# Supplementary material for: Ctenosciara alexanderkoenigi sp. n. (Diptera: Sciaridae), an exotic invader in Germany?
Source: PubMed Central journal article supplement (PMC4822059; doi:10.3897/bdj.4.e6460), 2016-04-01
Supplement: biodiversity_data_journal-4-e6460-s006.pdf [file biodiversity_data_journal-4-e6460-s006.pdf]

# BOLD TaxonID Tree

Title : Tree Result - Search (4047 records)  
Date : 20-January-2016  
Data Type : Nucleotide  
Distance Model : Kimura 2 Parameter  
Marker : COI-5P  
Colourization :

Label : Process ID  
Label : Country  
Label : Barcode Cluster (BIN)

Filter : exclude records with stop codons  
Filter : exclude contaminants

Sequence Count : 4047  
Species count : 2  
Genus count : 1  
Family count : 1  
Unidentified : 0

BIN Count : 1



















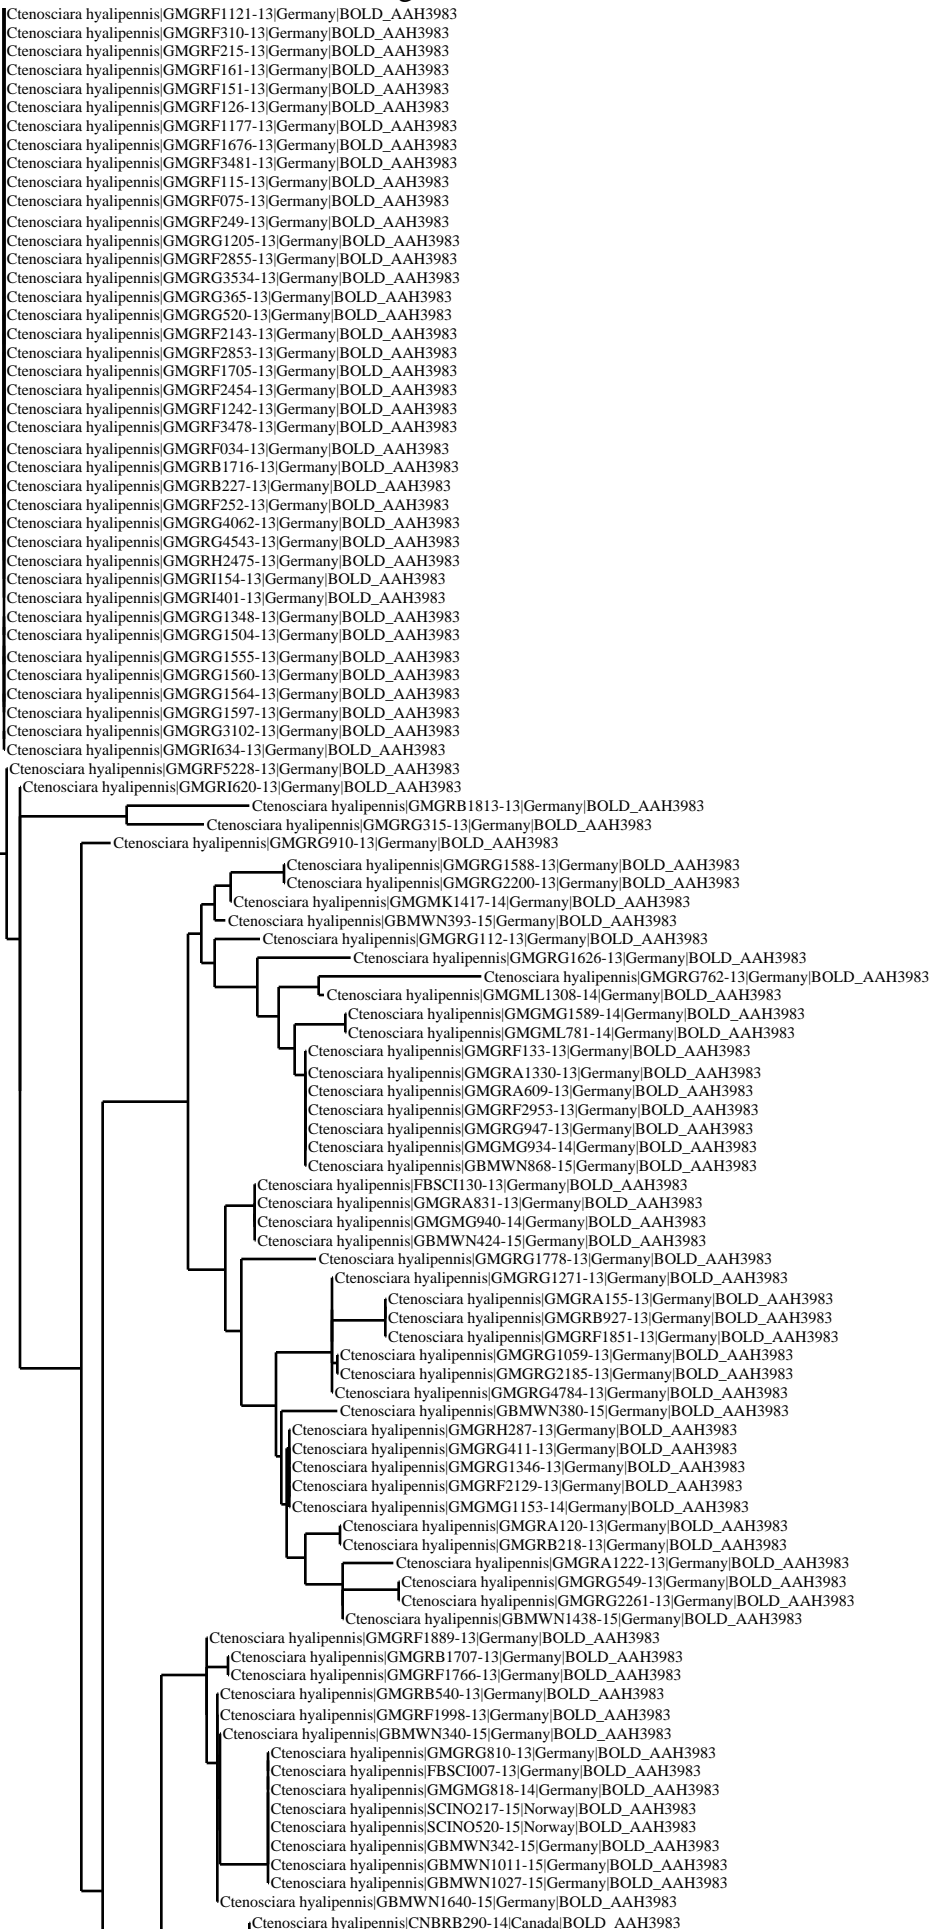



Ctenosciara hyalipennis|SSBRC707-14|Canada|BOLD\_AAH3983  
Ctenosciara hyalipennis|SSBRC693-14|Canada|BOLD\_AAH3983  
Ctenosciara hyalipennis|SSBRC690-14|Canada|BOLD\_AAH3983  
Ctenosciara hyalipennis|SSBRC685-14|Canada|BOLD\_AAH3983  
Ctenosciara hyalipennis|SSBRC682-14|Canada|BOLD\_AAH3983  
Ctenosciara hyalipennis|SSBRC658-14|Canada|BOLD\_AAH3983  
Ctenosciara hyalipennis|SSBRC630-14|Canada|BOLD\_AAH3983  
Ctenosciara hyalipennis|CNBRK107-14|Canada|BOLD\_AAH3983  
Ctenosciara hyalipennis|CNBRQ557-14|Canada|BOLD\_AAH3983  
Ctenosciara hyalipennis|SSBRC755-14|Canada|BOLD\_AAH3983  
Ctenosciara hyalipennis|CNBRN182-14|Canada|BOLD\_AAH3983  
Ctenosciara hyalipennis|CNBRK340-14|Canada|BOLD\_AAH3983  
Ctenosciara hyalipennis|CNPEB117-14|Canada|BOLD\_AAH3983  
Ctenosciara hyalipennis|CNBRA039-14|Canada|BOLD\_AAH3983  
Ctenosciara hyalipennis|CNBRB272-14|Canada|BOLD\_AAH3983  
Ctenosciara hyalipennis|CNBRA072-14|Canada|BOLD\_AAH3983  
Ctenosciara hyalipennis|SSBRC773-14|Canada|BOLD\_AAH3983  
Ctenosciara hyalipennis|SSBRC796-14|Canada|BOLD\_AAH3983  
Ctenosciara hyalipennis|SSBRC988-14|Canada|BOLD\_AAH3983  
Ctenosciara hyalipennis|SSBRC1100-14|Canada|BOLD\_AAH3983  
Ctenosciara hyalipennis|SSBRC1343-14|Canada|BOLD\_AAH3983  
Ctenosciara hyalipennis|SSBRC1364-14|Canada|BOLD\_AAH3983  
Ctenosciara hyalipennis|SSBRC1931-14|Canada|BOLD\_AAH3983  
Ctenosciara hyalipennis|SSBRC735-14|Canada|BOLD\_AAH3983  
Ctenosciara hyalipennis|SSBRC726-14|Canada|BOLD\_AAH3983  
Ctenosciara hyalipennis|SSBRC663-14|Canada|BOLD\_AAH3983  
Ctenosciara hyalipennis|CNBR181-14|Canada|BOLD\_AAH3983  
Ctenosciara hyalipennis|CNTIB501-15|Canada|BOLD\_AAH3983  
Ctenosciara hyalipennis|SSBRC1396-14|Canada|BOLD\_AAH3983  
Ctenosciara hyalipennis|SSBRC1365-14|Canada|BOLD\_AAH3983  
Ctenosciara hyalipennis|SSBRC1207-14|Canada|BOLD\_AAH3983  
Ctenosciara hyalipennis|SSBRC1097-14|Canada|BOLD\_AAH3983  
Ctenosciara hyalipennis|SSBRC993-14|Canada|BOLD\_AAH3983  
Ctenosciara hyalipennis|SSBRC986-14|Canada|BOLD\_AAH3983  
Ctenosciara hyalipennis|CNBRK195-14|Canada|BOLD\_AAH3983  
Ctenosciara hyalipennis|CNBRK157-14|Canada|BOLD\_AAH3983  
Ctenosciara hyalipennis|CNBRK154-14|Canada|BOLD\_AAH3983  
Ctenosciara hyalipennis|SSBRC1208-14|Canada|BOLD\_AAH3983  
Ctenosciara hyalipennis|CNBRA141-14|Canada|BOLD\_AAH3983  
Ctenosciara hyalipennis|SMTJ5631-14|Canada|BOLD\_AAH3983  
Ctenosciara hyalipennis|SSBRC2845-14|Canada|BOLD\_AAH3983  
Ctenosciara hyalipennis|SSBRC2085-14|Canada|BOLD\_AAH3983  
Ctenosciara hyalipennis|SSBRC1325-14|Canada|BOLD\_AAH3983  
Ctenosciara hyalipennis|SSBRC1316-14|Canada|BOLD\_AAH3983  
Ctenosciara hyalipennis|SSBRC976-14|Canada|BOLD\_AAH3983  
Ctenosciara hyalipennis|SSBRC932-14|Canada|BOLD\_AAH3983  
Ctenosciara hyalipennis|CNBRB165-14|Canada|BOLD\_AAH3983  
Ctenosciara hyalipennis|SSBRC1946-14|Canada|BOLD\_AAH3983  
Ctenosciara hyalipennis|SSBRC1393-14|Canada|BOLD\_AAH3983  
Ctenosciara hyalipennis|SSBRC1110-14|Canada|BOLD\_AAH3983  
Ctenosciara hyalipennis|SSBRC660-14|Canada|BOLD\_AAH3983  
Ctenosciara hyalipennis|SMTJ5719-14|Canada|BOLD\_AAH3983  
Ctenosciara hyalipennis|SSBRC1112-14|Canada|BOLD\_AAH3983  
Ctenosciara hyalipennis|CNBRK401-14|Canada|BOLD\_AAH3983  
Ctenosciara hyalipennis|SSBRC3248-14|Canada|BOLD\_AAH3983  
Ctenosciara hyalipennis|SSBRC1380-14|Canada|BOLD\_AAH3983  
Ctenosciara hyalipennis|SSBRC1354-14|Canada|BOLD\_AAH3983  
Ctenosciara hyalipennis|SSBRC1229-14|Canada|BOLD\_AAH3983  
Ctenosciara hyalipennis|SSBRC1187-14|Canada|BOLD\_AAH3983  
Ctenosciara hyalipennis|SSBRC939-14|Canada|BOLD\_AAH3983  
Ctenosciara hyalipennis|SSBRC938-14|Canada|BOLD\_AAH3983  
Ctenosciara hyalipennis|SSBRC930-14|Canada|BOLD\_AAH3983  
Ctenosciara hyalipennis|CNBRF261-14|Canada|BOLD\_AAH3983  
Ctenosciara hyalipennis|SSBRC1918-14|Canada|BOLD\_AAH3983  
Ctenosciara hyalipennis|SSBRC1149-14|Canada|BOLD\_AAH3983  
Ctenosciara hyalipennis|SSBRC963-14|Canada|BOLD\_AAH3983  
Ctenosciara hyalipennis|CNBRA117-14|Canada|BOLD\_AAH3983  
Ctenosciara hyalipennis|SSBRC1889-14|Canada|BOLD\_AAH3983  
Ctenosciara hyalipennis|SSBRC1204-14|Canada|BOLD\_AAH3983  
Ctenosciara hyalipennis|SSBRC657-14|Canada|BOLD\_AAH3983  
Ctenosciara hyalipennis|CNBRN180-14|Canada|BOLD\_AAH3983  
Ctenosciara hyalipennis|SSBRC931-14|Canada|BOLD\_AAH3983  
Ctenosciara hyalipennis|PANOV082-12|Canada|BOLD\_AAH3983  
Ctenosciara hyalipennis|SSBRC1164-14|Canada|BOLD\_AAH3983  
Ctenosciara hyalipennis|CNTIE1221-15|Canada|BOLD\_AAH3983  
Ctenosciara hyalipennis|CNTIG1006-15|Canada|BOLD\_AAH3983  
Ctenosciara hyalipennis|RRSSA2547-15|Canada|BOLD\_AAH3983  
Ctenosciara hyalipennis|RRSSA3297-15|Canada|BOLD\_AAH3983  
Ctenosciara hyalipennis|GMGRA398-13|Germany|BOLD\_AAH3983  
Ctenosciara hyalipennis|GMGRF3705-13|Germany|BOLD\_AAH3983  
Ctenosciara hyalipennis|GMGRG1899-13|Germany|BOLD\_AAH3983  
Ctenosciara hyalipennis|SSPRA496-15|Canada|BOLD\_AAH3983  
Ctenosciara hyalipennis|CNGAC624-15|Canada|BOLD\_AAH3983  
Ctenosciara hyalipennis|HEOCT1099-12|Canada|BOLD\_AAH3983  
Ctenosciara hyalipennis|RRSSA3465-15|Canada|BOLD\_AAH3983  
Ctenosciara hyalipennis|RRSSA2768-15|Canada|BOLD\_AAH3983  
Ctenosciara hyalipennis|SMTPM6037-15|Canada|BOLD\_AAH3983  
Ctenosciara hyalipennis|CNRVG767-15|Canada|BOLD\_AAH3983  
Ctenosciara hyalipennis|CNGUH358-15|Canada|BOLD\_AAH3983  
Ctenosciara hyalipennis|CNROC259-13|Canada|BOLD\_AAH3983  
Ctenosciara hyalipennis|CNRVG1116-15|Canada|BOLD\_AAH3983  
Ctenosciara hyalipennis|GMGMG975-14|Germany|BOLD\_AAH3983  
Ctenosciara hyalipennis|RRSSA1147-15|Canada|BOLD\_AAH3983  
Ctenosciara hyalipennis|RRSSA939-15|Canada|BOLD\_AAH3983  
Ctenosciara hyalipennis|RRMFD1282-15|Canada|BOLD\_AAH3983  
Ctenosciara hyalipennis|CNRVF331-15|Canada|BOLD\_AAH3983  
Ctenosciara hyalipennis|CNRVF158-15|Canada|BOLD\_AAH3983  
Ctenosciara hyalipennis|CNGAC308-15|Canada|BOLD\_AAH3983  
Ctenosciara hyalipennis|CNRVA1327-15|Canada|BOLD\_AAH3983  
Ctenosciara hyalipennis|CNRVA669-15|Canada|BOLD\_AAH3983  
Ctenosciara hyalipennis|CNGAB684-15|Canada|BOLD\_AAH3983  
Ctenosciara hyalipennis|CNGAB684-15|Canada|BOLD\_AAH3983



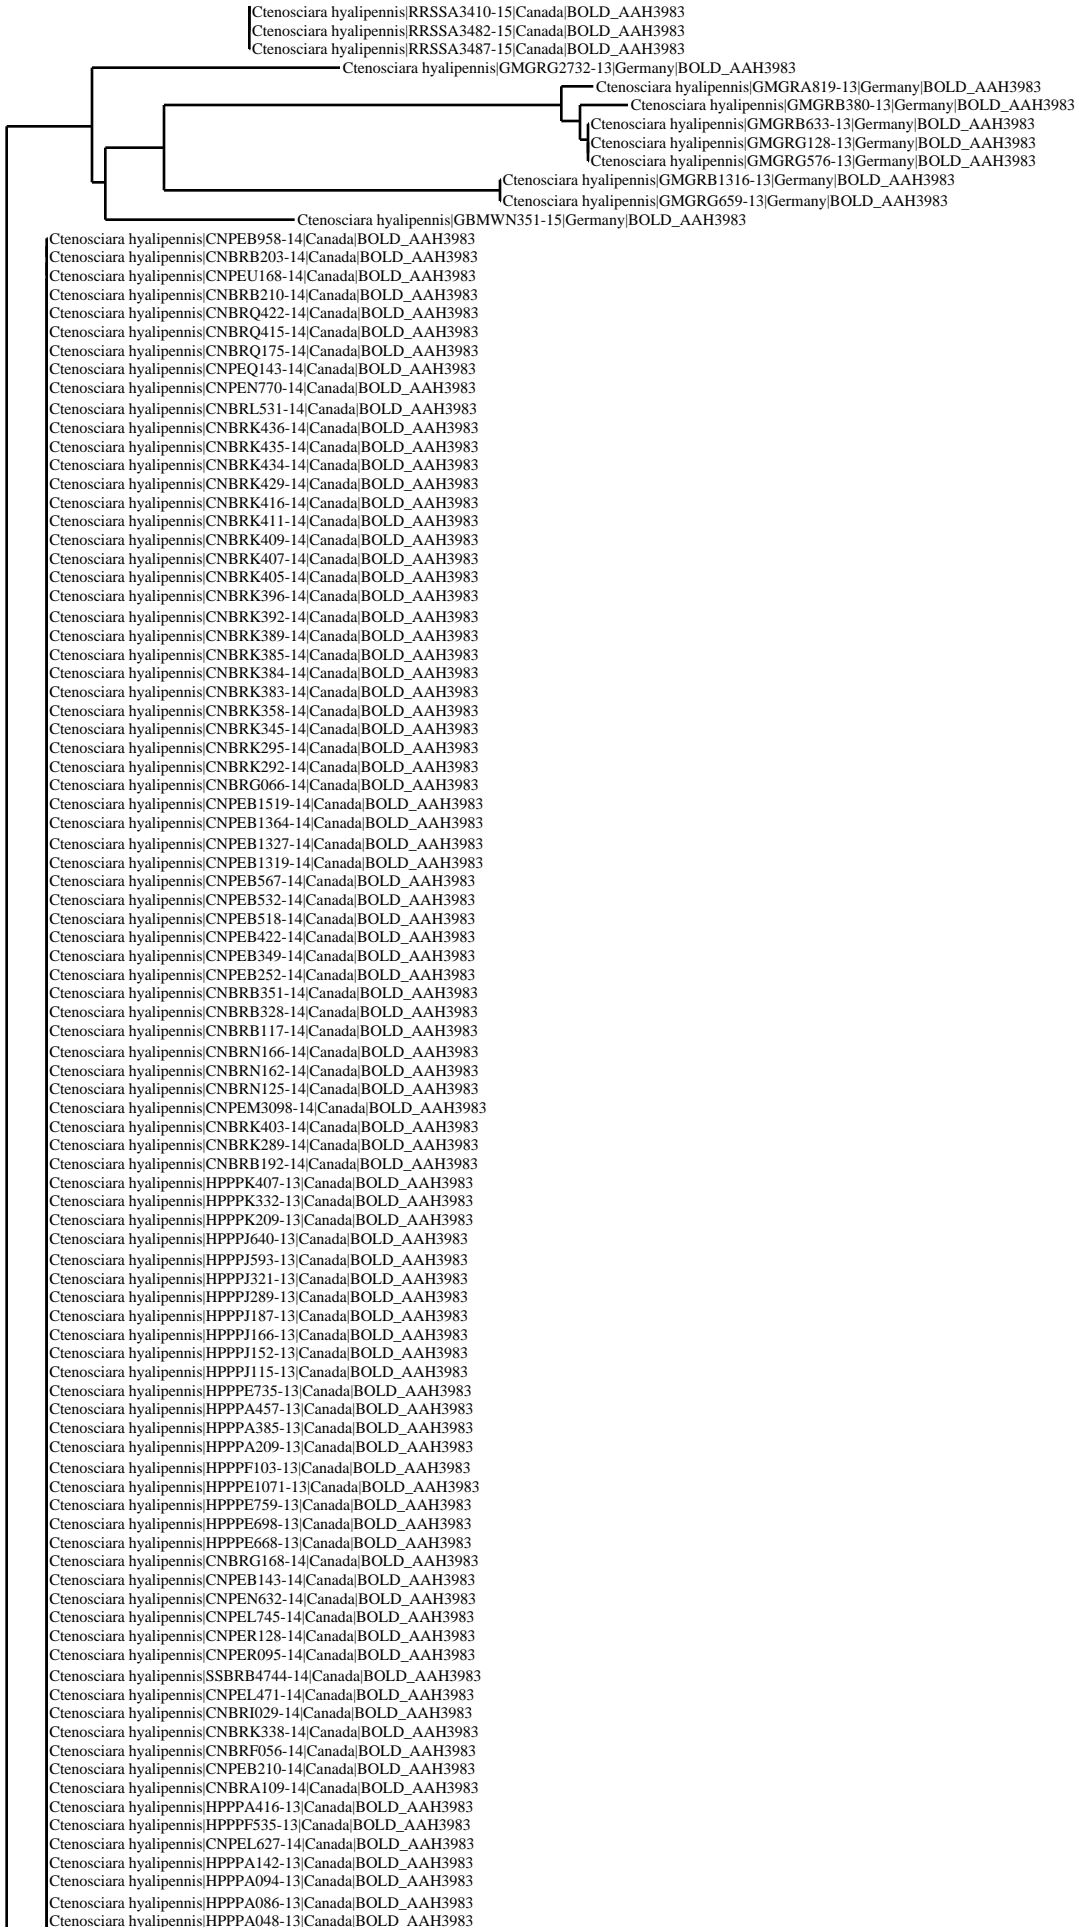

















Ctenosciara hyalipennis|SSBRA711-14|Canada|BOLD\_AAH3983  
Ctenosciara hyalipennis|SSBRA692-14|Canada|BOLD\_AAH3983  
Ctenosciara hyalipennis|SSBRB400-14|Canada|BOLD\_AAH3983  
Ctenosciara hyalipennis|SSBRB220-14|Canada|BOLD\_AAH3983  
Ctenosciara hyalipennis|SSBRB213-14|Canada|BOLD\_AAH3983  
Ctenosciara hyalipennis|SSBRB147-14|Canada|BOLD\_AAH3983  
Ctenosciara hyalipennis|SSBRB136-14|Canada|BOLD\_AAH3983  
Ctenosciara hyalipennis|SSBRB044-14|Canada|BOLD\_AAH3983  
Ctenosciara hyalipennis|CNPEM770-14|Canada|BOLD\_AAH3983  
Ctenosciara hyalipennis|CNPEL1889-14|Canada|BOLD\_AAH3983  
Ctenosciara hyalipennis|CNPEL1597-14|Canada|BOLD\_AAH3983  
Ctenosciara hyalipennis|CNPEL1584-14|Canada|BOLD\_AAH3983  
Ctenosciara hyalipennis|CNBRK123-14|Canada|BOLD\_AAH3983  
Ctenosciara hyalipennis|CNBRK115-14|Canada|BOLD\_AAH3983  
Ctenosciara hyalipennis|HPPPF847-13|Canada|BOLD\_AAH3983  
Ctenosciara hyalipennis|CNPEL1365-14|Canada|BOLD\_AAH3983  
Ctenosciara hyalipennis|SSBRB225-14|Canada|BOLD\_AAH3983  
Ctenosciara hyalipennis|CNPEL700-14|Canada|BOLD\_AAH3983  
Ctenosciara hyalipennis|HPPPI376-13|Canada|BOLD\_AAH3983  
Ctenosciara hyalipennis|CNPED240-14|Canada|BOLD\_AAH3983  
Ctenosciara hyalipennis|CNPEL099-14|Canada|BOLD\_AAH3983  
Ctenosciara hyalipennis|HPPPA047-13|Canada|BOLD\_AAH3983  
Ctenosciara hyalipennis|HPPPF006-13|Canada|BOLD\_AAH3983  
Ctenosciara hyalipennis|CNPEM1482-14|Canada|BOLD\_AAH3983  
Ctenosciara hyalipennis|CNBRB181-14|Canada|BOLD\_AAH3983  
Ctenosciara hyalipennis|CNPEL216-14|Canada|BOLD\_AAH3983  
Ctenosciara hyalipennis|SSBRB519-14|Canada|BOLD\_AAH3983  
Ctenosciara hyalipennis|CNBRB116-14|Canada|BOLD\_AAH3983  
Ctenosciara hyalipennis|CNPEL189-14|Canada|BOLD\_AAH3983  
Ctenosciara hyalipennis|CNPEL046-14|Canada|BOLD\_AAH3983  
Ctenosciara hyalipennis|CNPEM593-14|Canada|BOLD\_AAH3983  
Ctenosciara hyalipennis|CNPEL1282-14|Canada|BOLD\_AAH3983  
Ctenosciara hyalipennis|CNPEL950-14|Canada|BOLD\_AAH3983  
Ctenosciara hyalipennis|CNPEL059-14|Canada|BOLD\_AAH3983  
Ctenosciara hyalipennis|CNPEL056-14|Canada|BOLD\_AAH3983  
Ctenosciara hyalipennis|CNBRK126-14|Canada|BOLD\_AAH3983  
Ctenosciara hyalipennis|HPPPA202-13|Canada|BOLD\_AAH3983  
Ctenosciara hyalipennis|CNBRQ446-14|Canada|  
Ctenosciara hyalipennis|CNBRN242-14|Canada|  
Ctenosciara hyalipennis|HPPPE762-13|Canada|BOLD\_AAH3983  
Ctenosciara hyalipennis|CNBRB199-14|Canada|BOLD\_AAH3983  
Ctenosciara hyalipennis|SSPEA423-15|Canada|BOLD\_AAH3983  
Ctenosciara hyalipennis|HPPPF040-13|Canada|BOLD\_AAH3983  
Ctenosciara hyalipennis|GMGRF862-13|Germany|BOLD\_AAH3983  
Ctenosciara hyalipennis|HPPPG005-13|Canada|BOLD\_AAH3983  
Ctenosciara hyalipennis|HPPPM279-13|Canada|BOLD\_AAH3983  
Ctenosciara hyalipennis|CNBRK166-14|Canada|BOLD\_AAH3983  
Ctenosciara hyalipennis|SSBRB2728-14|Canada|BOLD\_AAH3983  
Ctenosciara hyalipennis|CNPEM3017-14|Canada|BOLD\_AAH3983  
Ctenosciara hyalipennis|CNPEM3016-14|Canada|BOLD\_AAH3983  
Ctenosciara hyalipennis|GMGRG2294-13|Germany|BOLD\_AAH3983  
Ctenosciara hyalipennis|CNPEB166-14|Canada|BOLD\_AAH3983  
Ctenosciara hyalipennis|GMGRF1489-13|Germany|BOLD\_AAH3983  
Ctenosciara hyalipennis|HPPPE583-13|Canada|BOLD\_AAH3983  
Ctenosciara hyalipennis|HPPPE780-13|Canada|BOLD\_AAH3983  
Ctenosciara hyalipennis|CNBRB307-14|Canada|BOLD\_AAH3983  
Ctenosciara hyalipennis|CNBRB254-14|Canada|BOLD\_AAH3983  
Ctenosciara hyalipennis|CNBRA164-14|Canada|BOLD\_AAH3983  
Ctenosciara hyalipennis|HPPPF109-13|Canada|BOLD\_AAH3983  
Ctenosciara hyalipennis|CNPEL1909-14|Canada|BOLD\_AAH3983  
Ctenosciara hyalipennis|CNBRN135-14|Canada|BOLD\_AAH3983  
Ctenosciara hyalipennis|CNPEB1208-14|Canada|BOLD\_AAH3983  
Ctenosciara hyalipennis|CNBRK113-14|Canada|BOLD\_AAH3983  
Ctenosciara hyalipennis|CNBRJ122-14|Canada|BOLD\_AAH3983  
Ctenosciara hyalipennis|CNPEL192-14|Canada|BOLD\_AAH3983  
Ctenosciara hyalipennis|CNPEL183-14|Canada|BOLD\_AAH3983  
Ctenosciara hyalipennis|CNPEL170-14|Canada|BOLD\_AAH3983  
Ctenosciara hyalipennis|CNPEL156-14|Canada|BOLD\_AAH3983  
Ctenosciara hyalipennis|CNPEL145-14|Canada|BOLD\_AAH3983  
Ctenosciara hyalipennis|CNPEL045-14|Canada|BOLD\_AAH3983  
Ctenosciara hyalipennis|CNPEL044-14|Canada|BOLD\_AAH3983  
Ctenosciara hyalipennis|CNPEE976-14|Canada|BOLD\_AAH3983  
Ctenosciara hyalipennis|HPPPM394-13|Canada|BOLD\_AAH3983  
Ctenosciara hyalipennis|HPPPI596-13|Canada|BOLD\_AAH3983  
Ctenosciara hyalipennis|HPPPA166-13|Canada|BOLD\_AAH3983  
Ctenosciara hyalipennis|HPPPA134-13|Canada|BOLD\_AAH3983  
Ctenosciara hyalipennis|HPPPA123-13|Canada|BOLD\_AAH3983  
Ctenosciara hyalipennis|CNPEB225-14|Canada|BOLD\_AAH3983  
Ctenosciara hyalipennis|CNPEB125-14|Canada|BOLD\_AAH3983  
Ctenosciara hyalipennis|CNPEA751-14|Canada|BOLD\_AAH3983  
Ctenosciara hyalipennis|HPPPS125-13|Canada|BOLD\_AAH3983  
Ctenosciara hyalipennis|HPPPA225-13|Canada|BOLD\_AAH3983  
Ctenosciara hyalipennis|HPPPS133-14|Canada|BOLD\_AAH3983  
Ctenosciara hyalipennis|CNPEB1188-14|Canada|BOLD\_AAH3983  
Ctenosciara hyalipennis|HPPPK408-13|Canada|BOLD\_AAH3983  
Ctenosciara hyalipennis|HPPPF821-13|Canada|BOLD\_AAH3983  
Ctenosciara hyalipennis|HPPPF095-13|Canada|BOLD\_AAH3983  
Ctenosciara hyalipennis|CNBRK404-14|Canada|BOLD\_AAH3983  
Ctenosciara hyalipennis|CNPEB512-14|Canada|BOLD\_AAH3983  
Ctenosciara hyalipennis|CNBRK541-14|Canada|BOLD\_AAH3983  
Ctenosciara hyalipennis|HPPPK245-13|Canada|BOLD\_AAH3983  
Ctenosciara hyalipennis|HPPPA453-13|Canada|BOLD\_AAH3983  
Ctenosciara hyalipennis|SSBRB052-14|Canada|BOLD\_AAH3983  
Ctenosciara hyalipennis|HPPPL371-13|Canada|BOLD\_AAH3983  
Ctenosciara hyalipennis|HPPPF539-13|Canada|BOLD\_AAH3983  
Ctenosciara hyalipennis|HPPPA185-13|Canada|BOLD\_AAH3983  
Ctenosciara hyalipennis|HPPPA009-13|Canada|BOLD\_AAH3983  
Ctenosciara hyalipennis|CNBRB361-14|Canada|BOLD\_AAH3983  
Ctenosciara hyalipennis|HPPPI139-13|Canada|BOLD\_AAH3983  
Ctenosciara hyalipennis|HPPPA270-13|Canada|BOLD\_AAH3983  
Ctenosciara hyalipennis|HPPPA073-13|Canada|BOLD\_AAH3983  
Ctenosciara hyalipennis|HPPPA040-13|Canada|BOLD\_AAH3983

Ctenosciara hyalipennis|HPPPA270-13|Canada|BOLD\_AAH3983  
Ctenosciara hyalipennis|HPPPA073-13|Canada|BOLD\_AAH3983  
Ctenosciara hyalipennis|HPPPA040-13|Canada|BOLD\_AAH3983  
Ctenosciara hyalipennis|HPPPA032-13|Canada|BOLD\_AAH3983  
Ctenosciara hyalipennis|HPPPA019-13|Canada|BOLD\_AAH3983  
Ctenosciara hyalipennis|CNBRL520-14|Canada|BOLD\_AAH3983  
Ctenosciara hyalipennis|CNBRL463-14|Canada|BOLD\_AAH3983  
Ctenosciara hyalipennis|CNPEL081-14|Canada|BOLD\_AAH3983  
Ctenosciara hyalipennis|CNBRB285-14|Canada|BOLD\_AAH3983  
Ctenosciara hyalipennis|CNBRB245-14|Canada|BOLD\_AAH3983  
Ctenosciara hyalipennis|HPPPK365-13|Canada|BOLD\_AAH3983  
Ctenosciara hyalipennis|HPPPJ633-13|Canada|BOLD\_AAH3983  
Ctenosciara hyalipennis|HPPPJ597-13|Canada|BOLD\_AAH3983  
Ctenosciara hyalipennis|HPPPE1169-13|Canada|BOLD\_AAH3983  
Ctenosciara hyalipennis|HPPPE530-13|Canada|BOLD\_AAH3983  
Ctenosciara hyalipennis|HPPPC458-13|Canada|BOLD\_AAH3983  
Ctenosciara hyalipennis|HPPPB354-13|Canada|BOLD\_AAH3983  
Ctenosciara hyalipennis|HPPPA555-13|Canada|BOLD\_AAH3983  
Ctenosciara hyalipennis|HPPPA176-13|Canada|BOLD\_AAH3983  
Ctenosciara hyalipennis|HPPPA165-13|Canada|BOLD\_AAH3983  
Ctenosciara hyalipennis|HPPPA153-13|Canada|BOLD\_AAH3983  
Ctenosciara hyalipennis|HPPPA147-13|Canada|BOLD\_AAH3983  
Ctenosciara hyalipennis|HPPPA121-13|Canada|BOLD\_AAH3983  
Ctenosciara hyalipennis|HPPPA115-13|Canada|BOLD\_AAH3983  
Ctenosciara hyalipennis|HPPPA114-13|Canada|BOLD\_AAH3983  
Ctenosciara hyalipennis|HPPPA108-13|Canada|BOLD\_AAH3983  
Ctenosciara hyalipennis|CNBRL658-14|Canada|BOLD\_AAH3983  
Ctenosciara hyalipennis|CNPEB689-14|Canada|BOLD\_AAH3983  
Ctenosciara hyalipennis|CNPEB484-14|Canada|BOLD\_AAH3983  
Ctenosciara hyalipennis|CNBRK139-14|Canada|BOLD\_AAH3983  
Ctenosciara hyalipennis|CNBRP1562-14|Canada|BOLD\_AAH3983  
Ctenosciara hyalipennis|CNPEB493-14|Canada|BOLD\_AAH3983  
Ctenosciara hyalipennis|HPPPK373-13|Canada|BOLD\_AAH3983  
Ctenosciara hyalipennis|HPPPK219-13|Canada|BOLD\_AAH3983  
Ctenosciara hyalipennis|HPPPK198-13|Canada|BOLD\_AAH3983  
Ctenosciara hyalipennis|HPPPA434-13|Canada|BOLD\_AAH3983  
Ctenosciara hyalipennis|HPPPA159-13|Canada|BOLD\_AAH3983  
Ctenosciara hyalipennis|CNPEN267-14|Canada|BOLD\_AAH3983  
Ctenosciara hyalipennis|HPPPA364-13|Canada|BOLD\_AAH3983  
Ctenosciara hyalipennis|HPPPA230-13|Canada|BOLD\_AAH3983  
Ctenosciara hyalipennis|HPPPA148-13|Canada|BOLD\_AAH3983  
Ctenosciara hyalipennis|HPPPE631-13|Canada|BOLD\_AAH3983  
Ctenosciara hyalipennis|CNPEQ411-14|Canada|BOLD\_AAH3983  
Ctenosciara hyalipennis|CNBRA152-14|Canada|BOLD\_AAH3983  
Ctenosciara hyalipennis|CNBRA002-14|Canada|BOLD\_AAH3983  
Ctenosciara hyalipennis|HPPPF061-13|Canada|BOLD\_AAH3983  
Ctenosciara hyalipennis|CNBRB270-14|Canada|BOLD\_AAH3983  
Ctenosciara hyalipennis|SSBRB2166-14|Canada|BOLD\_AAH3983  
Ctenosciara hyalipennis|SSBRB482-14|Canada|BOLD\_AAH3983  
Ctenosciara hyalipennis|SSBRB404-14|Canada|BOLD\_AAH3983  
Ctenosciara hyalipennis|CNPEM124-14|Canada|BOLD\_AAH3983  
Ctenosciara hyalipennis|CNPEM042-14|Canada|BOLD\_AAH3983  
Ctenosciara hyalipennis|CNBRJ129-14|Canada|BOLD\_AAH3983  
Ctenosciara hyalipennis|GMGRF3843-13|Germany|BOLD\_AAH3983  
Ctenosciara hyalipennis|SSBRB2700-14|Canada|BOLD\_AAH3983  
Ctenosciara hyalipennis|CNBRQ619-14|Canada|BOLD\_AAH3983  
Ctenosciara hyalipennis|CNPEL1854-14|Canada|BOLD\_AAH3983  
Ctenosciara hyalipennis|CNPEL1232-14|Canada|BOLD\_AAH3983  
Ctenosciara hyalipennis|CNPEL977-14|Canada|BOLD\_AAH3983  
Ctenosciara hyalipennis|CNPEL576-14|Canada|BOLD\_AAH3983  
Ctenosciara hyalipennis|CNPEL384-14|Canada|BOLD\_AAH3983  
Ctenosciara hyalipennis|CNBRK238-14|Canada|BOLD\_AAH3983  
Ctenosciara hyalipennis|CNBRK133-14|Canada|BOLD\_AAH3983  
Ctenosciara hyalipennis|CNPEB1121-14|Canada|BOLD\_AAH3983  
Ctenosciara hyalipennis|CNBRB291-14|Canada|BOLD\_AAH3983  
Ctenosciara hyalipennis|CNBRA137-14|Canada|BOLD\_AAH3983  
Ctenosciara hyalipennis|CNBRA009-14|Canada|BOLD\_AAH3983  
Ctenosciara hyalipennis|HPPPE1199-13|Canada|BOLD\_AAH3983  
Ctenosciara hyalipennis|HPPPE622-13|Canada|BOLD\_AAH3983  
Ctenosciara hyalipennis|CNPEQ542-14|Canada|BOLD\_AAH3983  
Ctenosciara hyalipennis|CNPEB777-14|Canada|BOLD\_AAH3983  
Ctenosciara hyalipennis|HPPPK340-13|Canada|BOLD\_AAH3983  
Ctenosciara hyalipennis|SSBRB1671-14|Canada|BOLD\_AAH3983  
Ctenosciara hyalipennis|CNBRP1208-14|Canada|BOLD\_AAH3983  
Ctenosciara hyalipennis|HPPPA302-13|Canada|BOLD\_AAH3983  
Ctenosciara hyalipennis|GMGRH557-13|Germany|BOLD\_AAH3983  
Ctenosciara hyalipennis|CNPEM3002-14|Canada|BOLD\_AAH3983  
Ctenosciara hyalipennis|CNBRP1912-14|Canada|BOLD\_AAH3983  
Ctenosciara hyalipennis|SSPEA427-15|Canada|BOLD\_AAH3983  
Ctenosciara hyalipennis|SSPEA302-15|Canada|BOLD\_AAH3983  
Ctenosciara hyalipennis|SSPEA240-15|Canada|BOLD\_AAH3983  
Ctenosciara hyalipennis|SSBRB3414-14|Canada|BOLD\_AAH3983  
Ctenosciara hyalipennis|SSBRB3298-14|Canada|BOLD\_AAH3983  
Ctenosciara hyalipennis|SSBRB3282-14|Canada|BOLD\_AAH3983  
Ctenosciara hyalipennis|SSBRB3254-14|Canada|BOLD\_AAH3983  
Ctenosciara hyalipennis|SSBRB3193-14|Canada|BOLD\_AAH3983  
Ctenosciara hyalipennis|SSBRB3066-14|Canada|BOLD\_AAH3983  
Ctenosciara hyalipennis|SSBRB2615-14|Canada|BOLD\_AAH3983  
Ctenosciara hyalipennis|SSBRB117-14|Canada|BOLD\_AAH3983  
Ctenosciara hyalipennis|CNBRP1190-14|Canada|BOLD\_AAH3983  
Ctenosciara hyalipennis|CNPEM1274-14|Canada|BOLD\_AAH3983  
Ctenosciara hyalipennis|CNBRJ074-14|Canada|BOLD\_AAH3983  
Ctenosciara hyalipennis|CNBRJ029-14|Canada|BOLD\_AAH3983  
Ctenosciara hyalipennis|CNPEL1898-14|Canada|BOLD\_AAH3983  
Ctenosciara hyalipennis|CNPEL1855-14|Canada|BOLD\_AAH3983  
Ctenosciara hyalipennis|CNPEL1845-14|Canada|BOLD\_AAH3983  
Ctenosciara hyalipennis|CNPEL1746-14|Canada|BOLD\_AAH3983  
Ctenosciara hyalipennis|CNPEL1715-14|Canada|BOLD\_AAH3983  
Ctenosciara hyalipennis|CNPEL1545-14|Canada|BOLD\_AAH3983  
Ctenosciara hyalipennis|CNPEL1290-14|Canada|BOLD\_AAH3983  
Ctenosciara hyalipennis|CNPEL1253-14|Canada|BOLD\_AAH3983  
Ctenosciara hyalipennis|CNPEL1247-14|Canada|BOLD\_AAH3983





Ctenosciara hyalipennis|CNPEL557-14|Canada|BOLD\_AAH3983  
Ctenosciara hyalipennis|GMGRB1676-13|Germany|BOLD\_AAH3983  
Ctenosciara hyalipennis|CNBRN236-14|Canada|BOLD\_AAH3983  
Ctenosciara hyalipennis|CNBRL567-14|Canada|BOLD\_AAH3983  
Ctenosciara hyalipennis|HPPPF084-13|Canada|BOLD\_AAH3983  
Ctenosciara hyalipennis|CNPEL1327-14|Canada|BOLD\_AAH3983  
Ctenosciara hyalipennis|GMGRG1023-13|Germany|BOLD\_AAH3983  
Ctenosciara hyalipennis|CNBRQ269-14|Canada|BOLD\_AAH3983  
Ctenosciara hyalipennis|GMGRA596-13|Germany|BOLD\_AAH3983  
Ctenosciara hyalipennis|CNBRA160-14|Canada|BOLD\_AAH3983  
Ctenosciara hyalipennis|GMGRF4641-13|Germany|BOLD\_AAH3983  
Ctenosciara hyalipennis|CNBRQ221-14|Canada|BOLD\_AAH3983  
Ctenosciara hyalipennis|CNBRP582-14|Canada|BOLD\_AAH3983  
Ctenosciara hyalipennis|CNBRK440-14|Canada|BOLD\_AAH3983  
Ctenosciara hyalipennis|CNBRK438-14|Canada|BOLD\_AAH3983  
Ctenosciara hyalipennis|CNBRK388-14|Canada|BOLD\_AAH3983  
Ctenosciara hyalipennis|CNBRK368-14|Canada|BOLD\_AAH3983  
Ctenosciara hyalipennis|CNBRK294-14|Canada|BOLD\_AAH3983  
Ctenosciara hyalipennis|CNBRF824-14|Canada|BOLD\_AAH3983  
Ctenosciara hyalipennis|CNBRF819-14|Canada|BOLD\_AAH3983  
Ctenosciara hyalipennis|CNBRG037-14|Canada|BOLD\_AAH3983  
Ctenosciara hyalipennis|CNPED432-14|Canada|BOLD\_AAH3983  
Ctenosciara hyalipennis|CNPEB752-14|Canada|BOLD\_AAH3983  
Ctenosciara hyalipennis|CNPEB613-14|Canada|BOLD\_AAH3983  
Ctenosciara hyalipennis|CNPEL985-14|Canada|BOLD\_AAH3983  
Ctenosciara hyalipennis|CNPEB1730-14|Canada|BOLD\_AAH3983  
Ctenosciara hyalipennis|CNPEB1172-14|Canada|BOLD\_AAH3983  
Ctenosciara hyalipennis|CNBRN187-14|Canada|BOLD\_AAH3983  
Ctenosciara hyalipennis|CNPEL1740-14|Canada|BOLD\_AAH3983  
Ctenosciara hyalipennis|CNBRN225-14|Canada|BOLD\_AAH3983  
Ctenosciara hyalipennis|CNBRN219-14|Canada|BOLD\_AAH3983  
Ctenosciara hyalipennis|CNBRN216-14|Canada|BOLD\_AAH3983  
Ctenosciara hyalipennis|CNBRN215-14|Canada|BOLD\_AAH3983  
Ctenosciara hyalipennis|CNBRN168-14|Canada|BOLD\_AAH3983  
Ctenosciara hyalipennis|CNBRN149-14|Canada|BOLD\_AAH3983  
Ctenosciara hyalipennis|CNBRN138-14|Canada|BOLD\_AAH3983  
Ctenosciara hyalipennis|CNPEB1486-14|Canada|BOLD\_AAH3983  
Ctenosciara hyalipennis|HPPPA173-13|Canada|BOLD\_AAH3983  
Ctenosciara hyalipennis|CNPEB1111-14|Canada|BOLD\_AAH3983  
Ctenosciara hyalipennis|CNPEB103-14|Canada|BOLD\_AAH3983  
Ctenosciara hyalipennis|SSBRB273-14|Canada|BOLD\_AAH3983  
Ctenosciara hyalipennis|CNBR5121-14|Canada|BOLD\_AAH3983  
Ctenosciara hyalipennis|CNPEL1900-14|Canada|BOLD\_AAH3983  
Ctenosciara hyalipennis|CNPEB346-14|Canada|BOLD\_AAH3983  
Ctenosciara hyalipennis|CNPEA588-14|Canada|BOLD\_AAH3983  
Ctenosciara hyalipennis|CNBRB169-14|Canada|BOLD\_AAH3983  
Ctenosciara hyalipennis|HPPPE544-13|Canada|BOLD\_AAH3983  
Ctenosciara hyalipennis|CNPEM224-14|Canada|BOLD\_AAH3983  
Ctenosciara hyalipennis|SSPEA285-15|Canada|BOLD\_AAH3983  
Ctenosciara hyalipennis|CNPED270-14|Canada|BOLD\_AAH3983  
Ctenosciara hyalipennis|CNPER170-14|Canada|BOLD\_AAH3983  
Ctenosciara hyalipennis|HPPPF115-13|Canada|BOLD\_AAH3983  
Ctenosciara hyalipennis|HPPPG021-13|Canada|BOLD\_AAH3983  
Ctenosciara hyalipennis|HPPPS142-14|Canada|BOLD\_AAH3983  
Ctenosciara hyalipennis|CNBRM457-14|Canada|BOLD\_AAH3983  
Ctenosciara hyalipennis|HPPPA087-13|Canada|BOLD\_AAH3983  
Ctenosciara hyalipennis|HPPPB228-13|Canada|BOLD\_AAH3983  
Ctenosciara hyalipennis|CNBRB129-14|Canada|BOLD\_AAH3983  
Ctenosciara hyalipennis|CNPEB1303-14|Canada|BOLD\_AAH3983  
Ctenosciara hyalipennis|GMGRF3472-13|Germany|  
Ctenosciara hyalipennis|SSBRB182-14|Canada|BOLD\_AAH3983  
Ctenosciara hyalipennis|HPPPF189-13|Canada|BOLD\_AAH3983  
Ctenosciara hyalipennis|CNBRN163-14|Canada|BOLD\_AAH3983  
Ctenosciara hyalipennis|HPPPA193-13|Canada|BOLD\_AAH3983  
Ctenosciara hyalipennis|CNPEB393-14|Canada|BOLD\_AAH3983  
Ctenosciara hyalipennis|HPPPA247-13|Canada|BOLD\_AAH3983  
Ctenosciara hyalipennis|CNBRP990-14|Canada|BOLD\_AAH3983  
Ctenosciara hyalipennis|HPPPF228-13|Canada|BOLD\_AAH3983  
Ctenosciara hyalipennis|HPPPF237-13|Canada|BOLD\_AAH3983  
Ctenosciara hyalipennis|HPPPF179-13|Canada|BOLD\_AAH3983  
Ctenosciara hyalipennis|HPPPF217-13|Canada|BOLD\_AAH3983  
Ctenosciara hyalipennis|HPPPE630-13|Canada|BOLD\_AAH3983  
Ctenosciara hyalipennis|HPPPF131-13|Canada|BOLD\_AAH3983  
Ctenosciara hyalipennis|HPPPA467-13|Canada|BOLD\_AAH3983  
Ctenosciara hyalipennis|HPPPB204-13|Canada|BOLD\_AAH3983  
Ctenosciara hyalipennis|SSBRB2847-14|Canada|BOLD\_AAH3983  
Ctenosciara hyalipennis|SSBRB3369-14|Canada|BOLD\_AAH3983  
Ctenosciara hyalipennis|CNPEL124-14|Canada|BOLD\_AAH3983  
Ctenosciara hyalipennis|SSBRB2782-14|Canada|BOLD\_AAH3983  
Ctenosciara hyalipennis|SSPEA315-15|Canada|BOLD\_AAH3983  
Ctenosciara hyalipennis|SSPEA366-15|Canada|BOLD\_AAH3983  
Ctenosciara hyalipennis|GMGMM1542-14|Germany|BOLD\_AAH3983  
Ctenosciara hyalipennis|SSPEA232-15|Canada|BOLD\_AAH3983  
Ctenosciara hyalipennis|SSBRB3343-14|Canada|BOLD\_AAH3983  
Ctenosciara hyalipennis|SSBRA2965-14|Canada|BOLD\_AAH3983  
Ctenosciara hyalipennis|SSBRB3186-14|Canada|BOLD\_AAH3983  
Ctenosciara hyalipennis|SSBRB3194-14|Canada|BOLD\_AAH3983  
Ctenosciara hyalipennis|SSBRB1662-14|Canada|BOLD\_AAH3983  
Ctenosciara hyalipennis|SSBRB2601-14|Canada|BOLD\_AAH3983  
Ctenosciara hyalipennis|SSBRA963-14|Canada|BOLD\_AAH3983  
Ctenosciara hyalipennis|SSBRB1503-14|Canada|BOLD\_AAH3983  
Ctenosciara hyalipennis|SSBRB616-14|Canada|BOLD\_AAH3983  
Ctenosciara hyalipennis|SSBRA901-14|Canada|BOLD\_AAH3983  
Ctenosciara hyalipennis|SSBRB269-14|Canada|BOLD\_AAH3983  
Ctenosciara hyalipennis|SSBRB464-14|Canada|BOLD\_AAH3983  
Ctenosciara hyalipennis|SSBRB096-14|Canada|BOLD\_AAH3983  
Ctenosciara hyalipennis|SSBRB230-14|Canada|BOLD\_AAH3983  
Ctenosciara hyalipennis|SSBRB065-14|Canada|BOLD\_AAH3983  
Ctenosciara hyalipennis|SSBRB078-14|Canada|BOLD\_AAH3983  
Ctenosciara hyalipennis|CNPEM3444-14|Canada|BOLD\_AAH3983  
Ctenosciara hyalipennis|CNBR162-14|Canada|BOLD\_AAH3983  
Ctenosciara hyalipennis|CNPEM1939-14|Canada|BOLD\_AAH3983

Ctenosciara hyalipennis|CNPEM3444-14|Canada|BOLD\_AAH3983  
Ctenosciara hyalipennis|CNBRR162-14|Canada|BOLD\_AAH3983  
Ctenosciara hyalipennis|CNPEM1939-14|Canada|BOLD\_AAH3983  
Ctenosciara hyalipennis|CNPEM2648-14|Canada|BOLD\_AAH3983  
Ctenosciara hyalipennis|CNPEM498-14|Canada|BOLD\_AAH3983  
Ctenosciara hyalipennis|CNPEM1909-14|Canada|BOLD\_AAH3983  
Ctenosciara hyalipennis|CNBRJ090-14|Canada|BOLD\_AAH3983  
Ctenosciara hyalipennis|CNPEM497-14|Canada|BOLD\_AAH3983  
Ctenosciara hyalipennis|CNPEL1851-14|Canada|BOLD\_AAH3983  
Ctenosciara hyalipennis|CNPEL1912-14|Canada|BOLD\_AAH3983  
Ctenosciara hyalipennis|CNPEL917-14|Canada|BOLD\_AAH3983  
Ctenosciara hyalipennis|CNPEL1280-14|Canada|BOLD\_AAH3983  
Ctenosciara hyalipennis|CNPEL659-14|Canada|BOLD\_AAH3983  
Ctenosciara hyalipennis|CNPEL849-14|Canada|BOLD\_AAH3983  
Ctenosciara hyalipennis|CNBRK252-14|Canada|BOLD\_AAH3983  
Ctenosciara hyalipennis|CNPEL341-14|Canada|BOLD\_AAH3983  
Ctenosciara hyalipennis|CNBRK185-14|Canada|BOLD\_AAH3983  
Ctenosciara hyalipennis|CNBRK192-14|Canada|BOLD\_AAH3983  
Ctenosciara hyalipennis|CNBRK136-14|Canada|BOLD\_AAH3983  
Ctenosciara hyalipennis|CNBRK165-14|Canada|BOLD\_AAH3983  
Ctenosciara hyalipennis|CNBRF199-14|Canada|BOLD\_AAH3983  
Ctenosciara hyalipennis|CNBRK099-14|Canada|BOLD\_AAH3983  
Ctenosciara hyalipennis|HPPPR066-13|Canada|BOLD\_AAH3983  
Ctenosciara hyalipennis|HPPPR068-13|Canada|BOLD\_AAH3983  
Ctenosciara hyalipennis|HPPPA372-13|Canada|BOLD\_AAH3983  
Ctenosciara hyalipennis|HPPPR050-13|Canada|BOLD\_AAH3983  
Ctenosciara hyalipennis|HPPPA356-13|Canada|BOLD\_AAH3983  
Ctenosciara hyalipennis|HPPPA366-13|Canada|BOLD\_AAH3983  
Ctenosciara hyalipennis|HPPPA305-13|Canada|BOLD\_AAH3983  
Ctenosciara hyalipennis|HPPPA354-13|Canada|BOLD\_AAH3983  
Ctenosciara hyalipennis|HPPPA269-13|Canada|BOLD\_AAH3983  
Ctenosciara hyalipennis|HPPPA291-13|Canada|BOLD\_AAH3983  
Ctenosciara hyalipennis|HPPPJ275-13|Canada|BOLD\_AAH3983  
Ctenosciara hyalipennis|HPPPJ363-13|Canada|BOLD\_AAH3983  
Ctenosciara hyalipennis|HPPPA382-13|Canada|BOLD\_AAH3983  
Ctenosciara hyalipennis|CNBRQ504-14|Canada|BOLD\_AAH3983  
Ctenosciara hyalipennis|SSBRB243-14|Canada|BOLD\_AAH3983  
Ctenosciara hyalipennis|SSBRB251-14|Canada|BOLD\_AAH3983  
Ctenosciara hyalipennis|HPPPA398-13|Canada|BOLD\_AAH3983  
Ctenosciara hyalipennis|CNBRP489-14|Canada|BOLD\_AAH3983  
Ctenosciara hyalipennis|CNBRQ278-14|Canada|BOLD\_AAH3983  
Ctenosciara hyalipennis|CNBRQ369-14|Canada|BOLD\_AAH3983  
Ctenosciara hyalipennis|CNPER169-14|Canada|BOLD\_AAH3983  
Ctenosciara hyalipennis|CNBRQ216-14|Canada|BOLD\_AAH3983  
Ctenosciara hyalipennis|CNPEQ149-14|Canada|BOLD\_AAH3983  
Ctenosciara hyalipennis|CNPEQ346-14|Canada|BOLD\_AAH3983  
Ctenosciara hyalipennis|CNPEB480-14|Canada|BOLD\_AAH3983  
Ctenosciara hyalipennis|CNPEM346-14|Canada|BOLD\_AAH3983  
Ctenosciara hyalipennis|HPPPK188-13|Canada|BOLD\_AAH3983  
Ctenosciara hyalipennis|HPPPK216-13|Canada|BOLD\_AAH3983  
Ctenosciara hyalipennis|HPPPJ366-13|Canada|BOLD\_AAH3983  
Ctenosciara hyalipennis|HPPPK186-13|Canada|BOLD\_AAH3983  
Ctenosciara hyalipennis|HPPPJ239-13|Canada|BOLD\_AAH3983  
Ctenosciara hyalipennis|HPPPJ252-13|Canada|BOLD\_AAH3983  
Ctenosciara hyalipennis|HPPPJ112-13|Canada|BOLD\_AAH3983  
Ctenosciara hyalipennis|HPPPJ190-13|Canada|BOLD\_AAH3983  
Ctenosciara hyalipennis|GMGRF1645-13|Germany|BOLD\_AAH3983  
Ctenosciara hyalipennis|HPPPJ007-13|Canada|BOLD\_AAH3983  
Ctenosciara hyalipennis|HPPPA462-13|Canada|BOLD\_AAH3983  
Ctenosciara hyalipennis|HPPPE018-13|Canada|BOLD\_AAH3983  
Ctenosciara hyalipennis|CNBRJ079-14|Canada|BOLD\_AAH3983  
Ctenosciara hyalipennis|CNBRJ097-14|Canada|BOLD\_AAH3983  
Ctenosciara hyalipennis|HPPPJ394-13|Canada|BOLD\_AAH3983  
Ctenosciara hyalipennis|HPPPS044-13|Canada|BOLD\_AAH3983  
Ctenosciara hyalipennis|GMGRF2214-13|Germany|BOLD\_AAH3983  
Ctenosciara hyalipennis|HPPPJ236-13|Canada|BOLD\_AAH3983  
Ctenosciara hyalipennis|HPPPE695-13|Canada|BOLD\_AAH3983  
Ctenosciara hyalipennis|HPPPE1209-13|Canada|BOLD\_AAH3983  
Ctenosciara hyalipennis|HPPPA461-13|Canada|BOLD\_AAH3983  
Ctenosciara hyalipennis|HPPPA464-13|Canada|BOLD\_AAH3983  
Ctenosciara hyalipennis|HPPPK395-13|Canada|BOLD\_AAH3983  
Ctenosciara hyalipennis|CNBRB119-14|Canada|BOLD\_AAH3983  
Ctenosciara hyalipennis|SSBRB2589-14|Canada|BOLD\_AAH3983  
Ctenosciara hyalipennis|SSBRB2600-14|Canada|BOLD\_AAH3983  
Ctenosciara hyalipennis|SSBRB066-14|Canada|BOLD\_AAH3983  
Ctenosciara hyalipennis|SSBRB076-14|Canada|BOLD\_AAH3983  
Ctenosciara hyalipennis|CNBRJ125-14|Canada|BOLD\_AAH3983  
Ctenosciara hyalipennis|SSBRB062-14|Canada|BOLD\_AAH3983  
Ctenosciara hyalipennis|CNPEL1863-14|Canada|BOLD\_AAH3983  
Ctenosciara hyalipennis|CNBRJ100-14|Canada|BOLD\_AAH3983  
Ctenosciara hyalipennis|CNPEL1752-14|Canada|BOLD\_AAH3983  
Ctenosciara hyalipennis|CNPEL1807-14|Canada|BOLD\_AAH3983  
Ctenosciara hyalipennis|CNPEL1391-14|Canada|BOLD\_AAH3983  
Ctenosciara hyalipennis|CNPEL1738-14|Canada|BOLD\_AAH3983  
Ctenosciara hyalipennis|CNBRN183-14|Canada|  
Ctenosciara hyalipennis|CNBRN204-14|Canada|  
Ctenosciara hyalipennis|CNPEB553-14|Canada|BOLD\_AAH3983  
Ctenosciara hyalipennis|CNBRN116-14|Canada|BOLD\_AAH3983  
Ctenosciara hyalipennis|CNBRB114-14|Canada|BOLD\_AAH3983  
Ctenosciara hyalipennis|CNBRQ408-14|Canada|BOLD\_AAH3983  
Ctenosciara hyalipennis|CNBRB156-14|Canada|BOLD\_AAH3983  
Ctenosciara hyalipennis|HPPPS134-14|Canada|BOLD\_AAH3983  
Ctenosciara hyalipennis|HPPPF162-13|Canada|BOLD\_AAH3983  
Ctenosciara hyalipennis|HPPPF208-13|Canada|BOLD\_AAH3983  
Ctenosciara hyalipennis|CNPEB775-14|Canada|BOLD\_AAH3983  
Ctenosciara hyalipennis|HPPPS150-14|Canada|BOLD\_AAH3983  
Ctenosciara hyalipennis|CNPEM1204-14|Canada|BOLD\_AAH3983  
Ctenosciara hyalipennis|CNPEM1937-14|Canada|BOLD\_AAH3983  
Ctenosciara hyalipennis|CNBRJ110-14|Canada|BOLD\_AAH3983  
Ctenosciara hyalipennis|CNPEM1103-14|Canada|BOLD\_AAH3983  
Ctenosciara hyalipennis|CNBRJ069-14|Canada|BOLD\_AAH3983  
Ctenosciara hyalipennis|CNBRJ075-14|Canada|BOLD\_AAH3983







Ctenosciara hyalipennis|CNBRK112-14|Canada|BOLD\_AAH3983  
Ctenosciara hyalipennis|CNBR1104-14|Canada|BOLD\_AAH3983  
Ctenosciara hyalipennis|CNBRK091-14|Canada|BOLD\_AAH3983  
Ctenosciara hyalipennis|GMGRF3202-13|Germany|BOLD\_AAH3983  
Ctenosciara hyalipennis|HPPPL501-13|Canada|BOLD\_AAH3983  
Ctenosciara hyalipennis|HPPPA352-13|Canada|BOLD\_AAH3983  
Ctenosciara hyalipennis|HPPPA358-13|Canada|BOLD\_AAH3983  
Ctenosciara hyalipennis|HPPPA344-13|Canada|BOLD\_AAH3983  
Ctenosciara hyalipennis|HPPPA351-13|Canada|BOLD\_AAH3983  
Ctenosciara hyalipennis|HPPPA328-13|Canada|BOLD\_AAH3983  
Ctenosciara hyalipennis|HPPPA329-13|Canada|BOLD\_AAH3983  
Ctenosciara hyalipennis|HPPPA272-13|Canada|BOLD\_AAH3983  
Ctenosciara hyalipennis|HPPPA320-13|Canada|BOLD\_AAH3983  
Ctenosciara hyalipennis|CNBRN237-14|Canada|BOLD\_AAH3983  
Ctenosciara hyalipennis|CNBRQ546-14|Canada|BOLD\_AAH3983  
Ctenosciara hyalipennis|CNPEL086-14|Canada|BOLD\_AAH3983  
Ctenosciara hyalipennis|SSPEA316-15|Canada|BOLD\_AAH3983  
Ctenosciara hyalipennis|HPPPA136-13|Canada|BOLD\_AAH3983  
Ctenosciara hyalipennis|GMGRG2136-13|Germany|BOLD\_AAH3983  
Ctenosciara hyalipennis|SSPEA353-15|Canada|BOLD\_AAH3983  
Ctenosciara hyalipennis|SSPEA425-15|Canada|BOLD\_AAH3983  
Ctenosciara hyalipennis|SSPEA254-15|Canada|BOLD\_AAH3983  
Ctenosciara hyalipennis|SSPEA288-15|Canada|BOLD\_AAH3983  
Ctenosciara hyalipennis|SSPEA189-15|Canada|BOLD\_AAH3983  
Ctenosciara hyalipennis|SSPEA241-15|Canada|BOLD\_AAH3983  
Ctenosciara hyalipennis|GMGMG789-14|Germany|BOLD\_AAH3983  
Ctenosciara hyalipennis|GMGMG840-14|Germany|BOLD\_AAH3983  
Ctenosciara hyalipennis|SSBRC1399-14|Canada|BOLD\_AAH3983  
Ctenosciara hyalipennis|SSBRC3256-14|Canada|BOLD\_AAH3983  
Ctenosciara hyalipennis|SSBRC1375-14|Canada|BOLD\_AAH3983  
Ctenosciara hyalipennis|SSBRC1395-14|Canada|BOLD\_AAH3983  
Ctenosciara hyalipennis|SSBRC1306-14|Canada|BOLD\_AAH3983  
Ctenosciara hyalipennis|SSBRC1355-14|Canada|BOLD\_AAH3983  
Ctenosciara hyalipennis|SSBRC937-14|Canada|BOLD\_AAH3983  
Ctenosciara hyalipennis|SSBRC1066-14|Canada|BOLD\_AAH3983  
Ctenosciara hyalipennis|SSBRC824-14|Canada|BOLD\_AAH3983  
Ctenosciara hyalipennis|SSBRC927-14|Canada|BOLD\_AAH3983  
Ctenosciara hyalipennis|SSBRB3285-14|Canada|BOLD\_AAH3983  
Ctenosciara hyalipennis|SSBRB3321-14|Canada|BOLD\_AAH3983  
Ctenosciara hyalipennis|SSBRB3252-14|Canada|BOLD\_AAH3983  
Ctenosciara hyalipennis|SSBRB3271-14|Canada|BOLD\_AAH3983  
Ctenosciara hyalipennis|SSBRB3190-14|Canada|BOLD\_AAH3983  
Ctenosciara hyalipennis|SSBRB3192-14|Canada|BOLD\_AAH3983  
Ctenosciara hyalipennis|SSBRB3183-14|Canada|BOLD\_AAH3983  
Ctenosciara hyalipennis|SSBRB3188-14|Canada|BOLD\_AAH3983  
Ctenosciara hyalipennis|CNBRQ373-14|Canada|BOLD\_AAH3983  
Ctenosciara hyalipennis|CNBRQ381-14|Canada|BOLD\_AAH3983  
Ctenosciara hyalipennis|CNBRB143-14|Canada|BOLD\_AAH3983  
Ctenosciara hyalipennis|CNBRB201-14|Canada|BOLD\_AAH3983  
Ctenosciara hyalipennis|CNPEB1297-14|Canada|BOLD\_AAH3983  
Ctenosciara hyalipennis|CNBRK387-14|Canada|BOLD\_AAH3983  
Ctenosciara hyalipennis|HPPPA274-13|Canada|BOLD\_AAH3983  
Ctenosciara hyalipennis|CNBRN174-14|Canada|BOLD\_AAH3983  
Ctenosciara hyalipennis|CNPEL1078-14|Canada|BOLD\_AAH3983  
Ctenosciara hyalipennis|CNPEL1225-14|Canada|BOLD\_AAH3983  
Ctenosciara hyalipennis|CNPEL951-14|Canada|BOLD\_AAH3983  
Ctenosciara hyalipennis|CNPEL994-14|Canada|BOLD\_AAH3983  
Ctenosciara hyalipennis|CNPEL857-14|Canada|BOLD\_AAH3983  
Ctenosciara hyalipennis|CNPEL913-14|Canada|BOLD\_AAH3983  
Ctenosciara hyalipennis|CNPEL182-14|Canada|BOLD\_AAH3983  
Ctenosciara hyalipennis|CNBRN1224-14|Canada|BOLD\_AAH3983  
Ctenosciara hyalipennis|SSBRB3200-14|Canada|BOLD\_AAH3983  
Ctenosciara hyalipennis|SSBRB3247-14|Canada|BOLD\_AAH3983  
Ctenosciara hyalipennis|GMGRF2632-13|Germany|BOLD\_AAH3983  
Ctenosciara hyalipennis|CNPEB1724-14|Canada|BOLD\_AAH3983  
Ctenosciara hyalipennis|HPPPA090-13|Canada|BOLD\_AAH3983  
Ctenosciara hyalipennis|CNPEL200-14|Canada|BOLD\_AAH3983  
Ctenosciara hyalipennis|CNBRK210-14|Canada|BOLD\_AAH3983  
Ctenosciara hyalipennis|CNBRN157-14|Canada|BOLD\_AAH3983  
Ctenosciara hyalipennis|CNPEC198-14|Canada|BOLD\_AAH3983  
Ctenosciara hyalipennis|CNBRN181-14|Canada|BOLD\_AAH3983  
Ctenosciara hyalipennis|HPPPF520-13|Canada|BOLD\_AAH3983  
Ctenosciara hyalipennis|CNPEB1512-14|Canada|BOLD\_AAH3983  
Ctenosciara hyalipennis|HPPPA076-13|Canada|BOLD\_AAH3983  
Ctenosciara hyalipennis|HPPPA085-13|Canada|BOLD\_AAH3983  
Ctenosciara hyalipennis|CNBRP020-14|Canada|BOLD\_AAH3983  
Ctenosciara hyalipennis|CNBRQ294-14|Canada|BOLD\_AAH3983  
Ctenosciara hyalipennis|CNPEQ142-14|Canada|BOLD\_AAH3983  
Ctenosciara hyalipennis|CNPEQ354-14|Canada|BOLD\_AAH3983  
Ctenosciara hyalipennis|CNBRM378-14|Canada|BOLD\_AAH3983  
Ctenosciara hyalipennis|CNBRM484-14|Canada|BOLD\_AAH3983  
Ctenosciara hyalipennis|CNPEM2146-14|Canada|BOLD\_AAH3983  
Ctenosciara hyalipennis|CNBRN172-14|Canada|BOLD\_AAH3983  
Ctenosciara hyalipennis|CNBRK420-14|Canada|BOLD\_AAH3983  
Ctenosciara hyalipennis|CNBRL501-14|Canada|BOLD\_AAH3983  
Ctenosciara hyalipennis|CNPEB453-14|Canada|BOLD\_AAH3983  
Ctenosciara hyalipennis|CNBRK329-14|Canada|BOLD\_AAH3983  
Ctenosciara hyalipennis|CNPEB1727-14|Canada|BOLD\_AAH3983  
Ctenosciara hyalipennis|SSBRB2836-14|Canada|BOLD\_AAH3983  
Ctenosciara hyalipennis|CNBRM208-14|Canada|BOLD\_AAH3983  
Ctenosciara hyalipennis|CNPEA536-14|Canada|BOLD\_AAH3983  
Ctenosciara hyalipennis|HPPPE733-13|Canada|BOLD\_AAH3983  
Ctenosciara hyalipennis|CNBRA173-14|Canada|BOLD\_AAH3983  
Ctenosciara hyalipennis|HPPPS139-14|Canada|BOLD\_AAH3983  
Ctenosciara hyalipennis|CNBRQ230-14|Canada|BOLD\_AAH3983  
Ctenosciara hyalipennis|HPPPJ297-13|Canada|BOLD\_AAH3983  
Ctenosciara hyalipennis|CNBRB187-14|Canada|BOLD\_AAH3983  
Ctenosciara hyalipennis|HPPPF493-13|Canada|BOLD\_AAH3983  
Ctenosciara hyalipennis|HPPPF514-13|Canada|BOLD\_AAH3983  
Ctenosciara hyalipennis|HPPPF403-13|Canada|BOLD\_AAH3983  
Ctenosciara hyalipennis|HPPPF415-13|Canada|BOLD\_AAH3983  
Ctenosciara hyalipennis|HPPPA191-13|Canada|BOLD\_AAH3983

Ctenosciara hyalipennis|HPPPF403-13|Canada|BOLD\_AAH3983  
Ctenosciara hyalipennis|HPPPF415-13|Canada|BOLD\_AAH3983  
Ctenosciara hyalipennis|HPPPA191-13|Canada|BOLD\_AAH3983  
Ctenosciara hyalipennis|CNBR5124-14|Canada|BOLD\_AAH3983  
Ctenosciara hyalipennis|HPPPA333-13|Canada|BOLD\_AAH3983  
Ctenosciara hyalipennis|HPPPA342-13|Canada|BOLD\_AAH3983  
Ctenosciara hyalipennis|SSBRB3229-14|Canada|BOLD\_AAH3983  
Ctenosciara hyalipennis|GMGMC1530-14|Germany|BOLD\_AAH3983  
Ctenosciara hyalipennis|SSBRB3195-14|Canada|BOLD\_AAH3983  
Ctenosciara hyalipennis|SSBRB3211-14|Canada|BOLD\_AAH3983  
Ctenosciara hyalipennis|SSBRB588-14|Canada|BOLD\_AAH3983  
Ctenosciara hyalipennis|SSBRB2843-14|Canada|BOLD\_AAH3983  
Ctenosciara hyalipennis|CNPEL1423-14|Canada|BOLD\_AAH3983  
Ctenosciara hyalipennis|SSBRB218-14|Canada|BOLD\_AAH3983  
Ctenosciara hyalipennis|CNPEL1342-14|Canada|BOLD\_AAH3983  
Ctenosciara hyalipennis|CNPEL1346-14|Canada|BOLD\_AAH3983  
Ctenosciara hyalipennis|CNPEL1297-14|Canada|BOLD\_AAH3983  
Ctenosciara hyalipennis|CNPEL1332-14|Canada|BOLD\_AAH3983  
Ctenosciara hyalipennis|CNPEL1238-14|Canada|BOLD\_AAH3983  
Ctenosciara hyalipennis|CNPEL1250-14|Canada|BOLD\_AAH3983  
Ctenosciara hyalipennis|CNBRK260-14|Canada|BOLD\_AAH3983  
Ctenosciara hyalipennis|CNPEL233-14|Canada|BOLD\_AAH3983  
Ctenosciara hyalipennis|CNBRK243-14|Canada|BOLD\_AAH3983  
Ctenosciara hyalipennis|CNBRK250-14|Canada|BOLD\_AAH3983  
Ctenosciara hyalipennis|CNBRK207-14|Canada|BOLD\_AAH3983  
Ctenosciara hyalipennis|CNBRK230-14|Canada|BOLD\_AAH3983  
Ctenosciara hyalipennis|CNBRK203-14|Canada|BOLD\_AAH3983  
Ctenosciara hyalipennis|CNBRK205-14|Canada|BOLD\_AAH3983  
Ctenosciara hyalipennis|CNBRK174-14|Canada|BOLD\_AAH3983  
Ctenosciara hyalipennis|CNBRK193-14|Canada|BOLD\_AAH3983  
Ctenosciara hyalipennis|CNBRK172-14|Canada|BOLD\_AAH3983  
Ctenosciara hyalipennis|CNBRK173-14|Canada|BOLD\_AAH3983  
Ctenosciara hyalipennis|CNBRK130-14|Canada|BOLD\_AAH3983  
Ctenosciara hyalipennis|CNBRK132-14|Canada|BOLD\_AAH3983  
Ctenosciara hyalipennis|CNBRH179-14|Canada|BOLD\_AAH3983  
Ctenosciara hyalipennis|CNBRK105-14|Canada|BOLD\_AAH3983  
Ctenosciara hyalipennis|HPPPK354-13|Canada|BOLD\_AAH3983  
Ctenosciara hyalipennis|HPPPK652-13|Canada|BOLD\_AAH3983  
Ctenosciara hyalipennis|HPPPK281-13|Canada|BOLD\_AAH3983  
Ctenosciara hyalipennis|HPPPK345-13|Canada|BOLD\_AAH3983  
Ctenosciara hyalipennis|HPPPJ654-13|Canada|BOLD\_AAH3983  
Ctenosciara hyalipennis|HPPPJ956-13|Canada|BOLD\_AAH3983  
Ctenosciara hyalipennis|HPPPJ395-13|Canada|BOLD\_AAH3983  
Ctenosciara hyalipennis|HPPPJ606-13|Canada|BOLD\_AAH3983  
Ctenosciara hyalipennis|HPPPJ199-13|Canada|BOLD\_AAH3983  
Ctenosciara hyalipennis|HPPPJ253-13|Canada|BOLD\_AAH3983  
Ctenosciara hyalipennis|GMGRF1302-13|Germany|BOLD\_AAH3983  
Ctenosciara hyalipennis|HPPPJ171-13|Canada|BOLD\_AAH3983  
Ctenosciara hyalipennis|HPPPF051-13|Canada|BOLD\_AAH3983  
Ctenosciara hyalipennis|HPPPF777-13|Canada|BOLD\_AAH3983  
Ctenosciara hyalipennis|HPPPE1186-13|Canada|BOLD\_AAH3983  
Ctenosciara hyalipennis|HPPPF041-13|Canada|BOLD\_AAH3983  
Ctenosciara hyalipennis|HPPPE1094-13|Canada|BOLD\_AAH3983  
Ctenosciara hyalipennis|HPPPE1144-13|Canada|BOLD\_AAH3983  
Ctenosciara hyalipennis|HPPPE776-13|Canada|BOLD\_AAH3983  
Ctenosciara hyalipennis|HPPPE786-13|Canada|BOLD\_AAH3983  
Ctenosciara hyalipennis|HPPPE732-13|Canada|BOLD\_AAH3983  
Ctenosciara hyalipennis|HPPPE760-13|Canada|BOLD\_AAH3983  
Ctenosciara hyalipennis|CNBRN203-14|Canada|BOLD\_AAH3983  
Ctenosciara hyalipennis|CNPEN151-14|Canada|BOLD\_AAH3983  
Ctenosciara hyalipennis|HPPPA041-13|Canada|BOLD\_AAH3983  
Ctenosciara hyalipennis|HPPPA042-13|Canada|BOLD\_AAH3983  
Ctenosciara hyalipennis|SSPEA373-15|Canada|BOLD\_AAH3983  
Ctenosciara hyalipennis|SSPEA419-15|Canada|BOLD\_AAH3983  
Ctenosciara hyalipennis|SSBRB3598-14|Canada|BOLD\_AAH3983  
Ctenosciara hyalipennis|SSBRC1148-14|Canada|BOLD\_AAH3983  
Ctenosciara hyalipennis|SSBRB3327-14|Canada|BOLD\_AAH3983  
Ctenosciara hyalipennis|SSBRB3366-14|Canada|BOLD\_AAH3983  
Ctenosciara hyalipennis|SSBRB3231-14|Canada|BOLD\_AAH3983  
Ctenosciara hyalipennis|SSBRB3246-14|Canada|BOLD\_AAH3983  
Ctenosciara hyalipennis|SSBRB2771-14|Canada|BOLD\_AAH3983  
Ctenosciara hyalipennis|SSBRB3208-14|Canada|BOLD\_AAH3983  
Ctenosciara hyalipennis|CNBRJ035-14|Canada|BOLD\_AAH3983  
Ctenosciara hyalipennis|CNBRO517-14|Canada|BOLD\_AAH3983  
Ctenosciara hyalipennis|CNPEL1129-14|Canada|BOLD\_AAH3983  
Ctenosciara hyalipennis|CNPEL1294-14|Canada|BOLD\_AAH3983  
Ctenosciara hyalipennis|CNBRK242-14|Canada|BOLD\_AAH3983  
Ctenosciara hyalipennis|CNPEL1096-14|Canada|BOLD\_AAH3983  
Ctenosciara hyalipennis|CNBRK187-14|Canada|BOLD\_AAH3983  
Ctenosciara hyalipennis|CNBRK234-14|Canada|BOLD\_AAH3983  
Ctenosciara hyalipennis|HPPPL022-13|Canada|BOLD\_AAH3983  
Ctenosciara hyalipennis|HPPPS032-13|Canada|BOLD\_AAH3983  
Ctenosciara hyalipennis|HPPPA317-13|Canada|BOLD\_AAH3983  
Ctenosciara hyalipennis|GMGRF2021-13|Germany|BOLD\_AAH3983  
Ctenosciara hyalipennis|HPPPL387-13|Canada|BOLD\_AAH3983  
Ctenosciara hyalipennis|SSBRB613-14|Canada|BOLD\_AAH3983  
Ctenosciara hyalipennis|CNPEB1369-14|Canada|BOLD\_AAH3983  
Ctenosciara hyalipennis|CNPEN411-14|Canada|BOLD\_AAH3983  
Ctenosciara hyalipennis|HPPPA415-13|Canada|BOLD\_AAH3983  
Ctenosciara hyalipennis|CNPEB552-14|Canada|BOLD\_AAH3983  
Ctenosciara hyalipennis|HPPPJ373-13|Canada|BOLD\_AAH3983  
Ctenosciara hyalipennis|HPPPR087-13|Canada|BOLD\_AAH3983  
Ctenosciara hyalipennis|CNPEB1360-14|Canada|BOLD\_AAH3983  
Ctenosciara hyalipennis|CNPEB1405-14|Canada|BOLD\_AAH3983  
Ctenosciara hyalipennis|HPPPS055-13|Canada|BOLD\_AAH3983  
Ctenosciara hyalipennis|CNBRB209-14|Canada|BOLD\_AAH3983  
Ctenosciara hyalipennis|HPPPJ315-13|Canada|BOLD\_AAH3983  
Ctenosciara hyalipennis|HPPPJ371-13|Canada|BOLD\_AAH3983  
Ctenosciara hyalipennis|HPPPE657-13|Canada|BOLD\_AAH3983  
Ctenosciara hyalipennis|HPPPE704-13|Canada|BOLD\_AAH3983  
Ctenosciara hyalipennis|HPPPB249-13|Canada|BOLD\_AAH3983  
Ctenosciara hyalipennis|HPPPE571-13|Canada|BOLD\_AAH3983

Ctenosciara hyalipennis|HPPPE704-13|Canada|BOLD\_AAH3983  
Ctenosciara hyalipennis|HPPPB249-13|Canada|BOLD\_AAH3983  
Ctenosciara hyalipennis|HPPPE571-13|Canada|BOLD\_AAH3983  
Ctenosciara hyalipennis|HPPPA475-13|Canada|BOLD\_AAH3983  
Ctenosciara hyalipennis|HPPPB200-13|Canada|BOLD\_AAH3983  
Ctenosciara hyalipennis|HPPPA390-13|Canada|BOLD\_AAH3983  
Ctenosciara hyalipennis|HPPPA392-13|Canada|BOLD\_AAH3983  
Ctenosciara hyalipennis|HPPPF072-13|Canada|BOLD\_AAH3983  
Ctenosciara hyalipennis|CNBRP1232-14|Canada|BOLD\_AAH3983  
Ctenosciara hyalipennis|HPPPE660-13|Canada|BOLD\_AAH3983  
Ctenosciara hyalipennis|CNBRN167-14|Canada|BOLD\_AAH3983  
Ctenosciara hyalipennis|HPPPA151-13|Canada|BOLD\_AAH3983  
Ctenosciara hyalipennis|HPPPE1074-13|Canada|BOLD\_AAH3983  
Ctenosciara hyalipennis|HPPPA107-13|Canada|BOLD\_AAH3983  
Ctenosciara hyalipennis|HPPPA130-13|Canada|BOLD\_AAH3983  
Ctenosciara hyalipennis|HPPPA413-13|Canada|BOLD\_AAH3983  
Ctenosciara hyalipennis|CNPEL586-14|Canada|BOLD\_AAH3983  
Ctenosciara hyalipennis|CNPEK171-14|Canada|BOLD\_AAH3983  
Ctenosciara hyalipennis|CNPEL1364-14|Canada|BOLD\_AAH3983  
Ctenosciara hyalipennis|HPPPA012-13|Canada|BOLD\_AAH3983  
Ctenosciara hyalipennis|HPPPE779-13|Canada|BOLD\_AAH3983  
Ctenosciara hyalipennis|CNBRP181-14|Canada|BOLD\_AAH3983  
Ctenosciara hyalipennis|CNBRP321-14|Canada|BOLD\_AAH3983  
Ctenosciara hyalipennis|HPPPA428-13|Canada|BOLD\_AAH3983  
Ctenosciara hyalipennis|HPPPA451-13|Canada|BOLD\_AAH3983  
Ctenosciara hyalipennis|CNBRA119-14|Canada|BOLD\_AAH3983  
Ctenosciara hyalipennis|SSBRB168-14|Canada|BOLD\_AAH3983  
Ctenosciara hyalipennis|HPPPE782-13|Canada|BOLD\_AAH3983  
Ctenosciara hyalipennis|CNBRN222-14|Canada|BOLD\_AAH3983  
Ctenosciara hyalipennis|CNBRK300-14|Canada|BOLD\_AAH3983  
Ctenosciara hyalipennis|SSBRB1600-14|Canada|BOLD\_AAH3983  
Ctenosciara hyalipennis|HPPPE643-13|Canada|BOLD\_AAH3983  
Ctenosciara hyalipennis|CNBRN1100-14|Canada|BOLD\_AAH3983  
Ctenosciara hyalipennis|CNPEB1363-14|Canada|BOLD\_AAH3983  
Ctenosciara hyalipennis|SSPEA217-15|Canada|BOLD\_AAH3983  
Ctenosciara hyalipennis|CNPEF619-14|Canada|BOLD\_AAH3983  
Ctenosciara hyalipennis|CNBRK281-14|Canada|BOLD\_AAH3983  
Ctenosciara hyalipennis|CNBRN146-14|Canada|BOLD\_AAH3983  
Ctenosciara hyalipennis|CNPEN783-14|Canada|BOLD\_AAH3983  
Ctenosciara hyalipennis|HPPPS135-14|Canada|BOLD\_AAH3983  
Ctenosciara hyalipennis|HPPPS138-14|Canada|BOLD\_AAH3983  
Ctenosciara hyalipennis|HPPPS148-14|Canada|BOLD\_AAH3983  
Ctenosciara hyalipennis|CNPED804-14|Canada|BOLD\_AAH3983  
Ctenosciara hyalipennis|CNBRA163-14|Canada|BOLD\_AAH3983  
Ctenosciara hyalipennis|CNBRB172-14|Canada|BOLD\_AAH3983  
Ctenosciara hyalipennis|CNBRB179-14|Canada|BOLD\_AAH3983  
Ctenosciara hyalipennis|CNPEB201-14|Canada|BOLD\_AAH3983  
Ctenosciara hyalipennis|HPPPF091-13|Canada|BOLD\_AAH3983  
Ctenosciara hyalipennis|HPPPF779-13|Canada|BOLD\_AAH3983  
Ctenosciara hyalipennis|HPPPJ664-13|Canada|BOLD\_AAH3983  
Ctenosciara hyalipennis|HPPPJ665-13|Canada|BOLD\_AAH3983  
Ctenosciara hyalipennis|HPPPJ260-13|Canada|BOLD\_AAH3983  
Ctenosciara hyalipennis|HPPPJ263-13|Canada|BOLD\_AAH3983  
Ctenosciara hyalipennis|HPPPA035-13|Canada|BOLD\_AAH3983  
Ctenosciara hyalipennis|CNBRQ467-14|Canada|BOLD\_AAH3983  
Ctenosciara hyalipennis|HPPPE608-13|Canada|BOLD\_AAH3983  
Ctenosciara hyalipennis|CNBRN120-14|Canada|BOLD\_AAH3983  
Ctenosciara hyalipennis|CNBRQ206-14|Canada|BOLD\_AAH3983  
Ctenosciara hyalipennis|CNBRQ391-14|Canada|BOLD\_AAH3983  
Ctenosciara hyalipennis|HPPPJ210-13|Canada|BOLD\_AAH3983  
Ctenosciara hyalipennis|HPPPK383-13|Canada|BOLD\_AAH3983  
Ctenosciara hyalipennis|HPPPK700-13|Canada|BOLD\_AAH3983  
Ctenosciara hyalipennis|CNBRK447-14|Canada|BOLD\_AAH3983  
Ctenosciara hyalipennis|HPPPJ379-13|Canada|BOLD\_AAH3983  
Ctenosciara hyalipennis|CNBRA150-14|Canada|BOLD\_AAH3983  
Ctenosciara hyalipennis|CNPEL1727-14|Canada|BOLD\_AAH3983  
Ctenosciara hyalipennis|CNBRK298-14|Canada|BOLD\_AAH3983  
Ctenosciara hyalipennis|SSBRB434-14|Canada|BOLD\_AAH3983  
Ctenosciara hyalipennis|SSBRB2696-14|Canada|BOLD\_AAH3983  
Ctenosciara hyalipennis|SSBRB2842-14|Canada|BOLD\_AAH3983  
Ctenosciara hyalipennis|SMTPI1679-14|Canada|BOLD\_AAH3983  
Ctenosciara hyalipennis|CNPEL932-14|Canada|BOLD\_AAH3983  
Ctenosciara hyalipennis|CNPEL1198-14|Canada|BOLD\_AAH3983  
Ctenosciara hyalipennis|CNPEL1440-14|Canada|BOLD\_AAH3983  
Ctenosciara hyalipennis|CNPEM030-14|Canada|BOLD\_AAH3983  
Ctenosciara hyalipennis|CNPEL376-14|Canada|BOLD\_AAH3983  
Ctenosciara hyalipennis|CNPEL500-14|Canada|BOLD\_AAH3983  
Ctenosciara hyalipennis|CNPEL554-14|Canada|BOLD\_AAH3983  
Ctenosciara hyalipennis|CNPEL565-14|Canada|BOLD\_AAH3983  
Ctenosciara hyalipennis|HPPPA223-13|Canada|BOLD\_AAH3983  
Ctenosciara hyalipennis|HPPPA234-13|Canada|BOLD\_AAH3983  
Ctenosciara hyalipennis|HPPPA288-13|Canada|BOLD\_AAH3983  
Ctenosciara hyalipennis|HPPPA318-13|Canada|BOLD\_AAH3983  
Ctenosciara hyalipennis|HPPPF250-13|Canada|BOLD\_AAH3983  
Ctenosciara hyalipennis|HPPPF276-13|Canada|BOLD\_AAH3983  
Ctenosciara hyalipennis|CNBRK109-14|Canada|BOLD\_AAH3983  
Ctenosciara hyalipennis|CNBRN220-14|Canada|BOLD\_AAH3983  
Ctenosciara hyalipennis|CNPEB385-14|Canada|BOLD\_AAH3983  
Ctenosciara hyalipennis|SSBRB2783-14|Canada|BOLD\_AAH3983  
Ctenosciara hyalipennis|SSBRB3332-14|Canada|BOLD\_AAH3983  
Ctenosciara hyalipennis|SSBRK1350-14|Canada|BOLD\_AAH3983  
Ctenosciara hyalipennis|HPPPF421-13|Canada|BOLD\_AAH3983  
Ctenosciara hyalipennis|CNPEB1436-14|Canada|BOLD\_AAH3983  
Ctenosciara hyalipennis|CNPEI051-14|Canada|BOLD\_AAH3983  
Ctenosciara hyalipennis|CNBRK156-14|Canada|BOLD\_AAH3983  
Ctenosciara hyalipennis|CNPEB1443-14|Canada|BOLD\_AAH3983  
Ctenosciara hyalipennis|CNPEF521-14|Canada|BOLD\_AAH3983  
Ctenosciara hyalipennis|HPPPE1064-13|Canada|BOLD\_AAH3983  
Ctenosciara hyalipennis|SSBRB1617-14|Canada|BOLD\_AAH3983  
Ctenosciara hyalipennis|HPPPF880-13|Canada|BOLD\_AAH3983  
Ctenosciara hyalipennis|GMGRF2346-13|Germany|BOLD\_AAH3983



Ctenosciara hyalipennis|SSBKB161-14|Canada|BOLD\_AAH3983  
Ctenosciara hyalipennis|HPPPF880-13|Canada|BOLD\_AAH3983  
Ctenosciara hyalipennis|GMGRF2346-13|Germany|BOLD\_AAH3983  
Ctenosciara hyalipennis|HPPPK217-13|Canada|BOLD\_AAH3983  
Ctenosciara hyalipennis|CNBRN142-14|Canada|BOLD\_AAH3983  
Ctenosciara hyalipennis|HPPPF491-13|Canada|BOLD\_AAH3983  
Ctenosciara hyalipennis|HPPPF517-13|Canada|BOLD\_AAH3983  
Ctenosciara hyalipennis|HPPPF534-13|Canada|BOLD\_AAH3983  
Ctenosciara hyalipennis|HPPPF536-13|Canada|BOLD\_AAH3983  
Ctenosciara hyalipennis|HPPPE023-13|Canada|BOLD\_AAH3983  
Ctenosciara hyalipennis|HPPPF031-13|Canada|BOLD\_AAH3983  
Ctenosciara hyalipennis|HPPPJ005-13|Canada|BOLD\_AAH3983  
Ctenosciara hyalipennis|HPPPJ643-13|Canada|BOLD\_AAH3983  
Ctenosciara hyalipennis|HPPPJ362-13|Canada|BOLD\_AAH3983  
Ctenosciara hyalipennis|HPPPJ368-13|Canada|BOLD\_AAH3983  
Ctenosciara hyalipennis|CNPEB834-14|Canada|BOLD\_AAH3983  
Ctenosciara hyalipennis|CNPEL173-14|Canada|BOLD\_AAH3983  
Ctenosciara hyalipennis|HPPPA043-13|Canada|BOLD\_AAH3983  
Ctenosciara hyalipennis|HPPPA050-13|Canada|BOLD\_AAH3983  
Ctenosciara hyalipennis|HPPPE623-13|Canada|BOLD\_AAH3983  
Ctenosciara hyalipennis|HPPPF163-13|Canada|BOLD\_AAH3983  
Ctenosciara hyalipennis|HPPPA322-13|Canada|BOLD\_AAH3983  
Ctenosciara hyalipennis|HPPPA350-13|Canada|BOLD\_AAH3983  
Ctenosciara hyalipennis|HPPPA275-13|Canada|BOLD\_AAH3983  
Ctenosciara hyalipennis|CNPEM1438-14|Canada|BOLD\_AAH3983  
Ctenosciara hyalipennis|HPPPA249-13|Canada|BOLD\_AAH3983  
Ctenosciara hyalipennis|HPPPA346-13|Canada|BOLD\_AAH3983  
Ctenosciara hyalipennis|GMGRG623-13|Germany|BOLD\_AAH3983  
Ctenosciara hyalipennis|HPPPS136-14|Canada|BOLD\_AAH3983  
Ctenosciara hyalipennis|HPPPA204-13|Canada|BOLD\_AAH3983  
Ctenosciara hyalipennis|HPPPA206-13|Canada|BOLD\_AAH3983  
Ctenosciara hyalipennis|HPPPA207-13|Canada|BOLD\_AAH3983  
Ctenosciara hyalipennis|HPPPA253-13|Canada|BOLD\_AAH3983  
Ctenosciara hyalipennis|HPPPF406-13|Canada|BOLD\_AAH3983  
Ctenosciara hyalipennis|HPPPF798-13|Canada|BOLD\_AAH3983  
Ctenosciara hyalipennis|GMGRF083-13|Germany|BOLD\_AAH3983  
Ctenosciara hyalipennis|CNPEA152-14|Canada|BOLD\_AAH3983  
Ctenosciara hyalipennis|HPPPJ332-13|Canada|BOLD\_AAH3983  
Ctenosciara hyalipennis|CNBRN232-14|Canada|BOLD\_AAH3983  
Ctenosciara hyalipennis|CNBRP937-14|Canada|BOLD\_AAH3983  
Ctenosciara hyalipennis|CNBRQ398-14|Canada|  
Ctenosciara hyalipennis|CNBRK169-14|Canada|BOLD\_AAH3983  
Ctenosciara hyalipennis|CNBRK176-14|Canada|BOLD\_AAH3983  
Ctenosciara hyalipennis|HPPPA227-13|Canada|BOLD\_AAH3983  
Ctenosciara hyalipennis|CNBRQ441-14|Canada|BOLD\_AAH3983  
Ctenosciara hyalipennis|HPPPA442-13|Canada|BOLD\_AAH3983  
Ctenosciara hyalipennis|HPPPE756-13|Canada|BOLD\_AAH3983  
Ctenosciara hyalipennis|CNPEM002-14|Canada|BOLD\_AAH3983  
Ctenosciara hyalipennis|CNPEM950-14|Canada|BOLD\_AAH3983  
Ctenosciara hyalipennis|CNPEL031-14|Canada|BOLD\_AAH3983  
Ctenosciara hyalipennis|CNPEL886-14|Canada|BOLD\_AAH3983  
Ctenosciara hyalipennis|SSBRA840-14|Canada|BOLD\_AAH3983  
Ctenosciara hyalipennis|SSBRB2195-14|Canada|BOLD\_AAH3983  
Ctenosciara hyalipennis|HPPPA394-13|Canada|BOLD\_AAH3983  
Ctenosciara hyalipennis|HPPPA439-13|Canada|BOLD\_AAH3983  
Ctenosciara hyalipennis|CNBRQ312-14|Canada|BOLD\_AAH3983  
Ctenosciara hyalipennis|CNBRQ364-14|Canada|BOLD\_AAH3983  
Ctenosciara hyalipennis|CNBRB200-14|Canada|BOLD\_AAH3983  
Ctenosciara hyalipennis|CNPEA922-14|Canada|BOLD\_AAH3983  
Ctenosciara hyalipennis|HPPPA016-13|Canada|BOLD\_AAH3983  
Ctenosciara hyalipennis|CNBRQ372-14|Canada|BOLD\_AAH3983  
Ctenosciara hyalipennis|CNPEL1449-14|Canada|BOLD\_AAH3983  
Ctenosciara hyalipennis|CNBR119-14|Canada|BOLD\_AAH3983  
Ctenosciara hyalipennis|CNBR070-14|Canada|BOLD\_AAH3983  
Ctenosciara hyalipennis|SSBRA793-14|Canada|BOLD\_AAH3983  
Ctenosciara hyalipennis|CNBRQ457-14|Canada|BOLD\_AAH3983  
Ctenosciara hyalipennis|CNBR084-14|Canada|BOLD\_AAH3983  
Ctenosciara hyalipennis|HPPPO089-13|Canada|BOLD\_AAH3983  
Ctenosciara hyalipennis|SSBRB2642-14|Canada|BOLD\_AAH3983  
Ctenosciara hyalipennis|HPPPA355-13|Canada|BOLD\_AAH3983  
Ctenosciara hyalipennis|CNBRK127-14|Canada|BOLD\_AAH3983  
Ctenosciara hyalipennis|CNPEL135-14|Canada|BOLD\_AAH3983  
Ctenosciara hyalipennis|CNPEL322-14|Canada|BOLD\_AAH3983  
Ctenosciara hyalipennis|CNBRK199-14|Canada|BOLD\_AAH3983  
Ctenosciara hyalipennis|CNBRQ473-14|Canada|BOLD\_AAH3983  
Ctenosciara hyalipennis|GMGRF1183-13|Germany|BOLD\_AAH3983  
Ctenosciara hyalipennis|SSBRB2735-14|Canada|BOLD\_AAH3983  
Ctenosciara hyalipennis|CNBRJ147-14|Canada|BOLD\_AAH3983  
Ctenosciara hyalipennis|CNBRJ184-14|Canada|BOLD\_AAH3983  
Ctenosciara hyalipennis|CNBRJ192-14|Canada|BOLD\_AAH3983  
Ctenosciara hyalipennis|CNPEO647-14|Canada|BOLD\_AAH3983  
Ctenosciara hyalipennis|CNBR179-14|Canada|BOLD\_AAH3983  
Ctenosciara hyalipennis|SSBRB228-14|Canada|BOLD\_AAH3983  
Ctenosciara hyalipennis|SSBRB2586-14|Canada|BOLD\_AAH3983  
Ctenosciara hyalipennis|SSBRB2750-14|Canada|BOLD\_AAH3983  
Ctenosciara hyalipennis|CNBRF209-14|Canada|BOLD\_AAH3983  
Ctenosciara hyalipennis|CNBR1072-14|Canada|BOLD\_AAH3983  
Ctenosciara hyalipennis|CNBR1102-14|Canada|BOLD\_AAH3983  
Ctenosciara hyalipennis|CNBRK087-14|Canada|BOLD\_AAH3983  
Ctenosciara hyalipennis|CNBRK257-14|Canada|BOLD\_AAH3983  
Ctenosciara hyalipennis|CNBRK261-14|Canada|BOLD\_AAH3983  
Ctenosciara hyalipennis|CNPEL345-14|Canada|BOLD\_AAH3983  
Ctenosciara hyalipennis|CNBRJ096-14|Canada|BOLD\_AAH3983  
Ctenosciara hyalipennis|CNPEL1127-14|Canada|BOLD\_AAH3983  
Ctenosciara hyalipennis|CNPEL1396-14|Canada|BOLD\_AAH3983  
Ctenosciara hyalipennis|CNPEL1566-14|Canada|BOLD\_AAH3983  
Ctenosciara hyalipennis|CNPEL1887-14|Canada|BOLD\_AAH3983  
Ctenosciara hyalipennis|SSBRB183-14|Canada|BOLD\_AAH3983  
Ctenosciara hyalipennis|SSBRB442-14|Canada|BOLD\_AAH3983  
Ctenosciara hyalipennis|SSBRA764-14|Canada|BOLD\_AAH3983  
Ctenosciara hyalipennis|SSBRB2704-14|Canada|BOLD\_AAH3983  
Ctenosciara hyalipennis|CNBR138-14|Canada|BOLD\_AAH3983



Ctenosciara hyalipennis|HPPPJ955-13|Canada|BOLD\_AAH3983  
Ctenosciara hyalipennis|CNBRK277-14|Canada|BOLD\_AAH3983  
Ctenosciara hyalipennis|CNBRK285-14|Canada|BOLD\_AAH3983  
Ctenosciara hyalipennis|HPPPE685-13|Canada|BOLD\_AAH3983  
Ctenosciara hyalipennis|HPPPF047-13|Canada|BOLD\_AAH3983  
Ctenosciara hyalipennis|CNBRP473-14|Canada|BOLD\_AAH3983  
Ctenosciara hyalipennis|CNBRP1014-14|Canada|BOLD\_AAH3983  
Ctenosciara hyalipennis|HPPPK378-13|Canada|BOLD\_AAH3983  
Ctenosciara hyalipennis|HPPPK380-13|Canada|BOLD\_AAH3983  
Ctenosciara hyalipennis|GMGRA1345-13|Germany|BOLD\_AAH3983  
Ctenosciara hyalipennis|CNBRL467-14|Canada|BOLD\_AAH3983  
Ctenosciara hyalipennis|CNPEQ322-14|Canada|BOLD\_AAH3983  
Ctenosciara hyalipennis|CNPEQ567-14|Canada|BOLD\_AAH3983  
Ctenosciara hyalipennis|CNPER068-14|Canada|BOLD\_AAH3983  
Ctenosciara hyalipennis|CNBRP435-14|Canada|BOLD\_AAH3983  
Ctenosciara hyalipennis|CNPEL762-14|Canada|BOLD\_AAH3983  
Ctenosciara hyalipennis|CNBRL482-14|Canada|BOLD\_AAH3983  
Ctenosciara hyalipennis|CNBRL625-14|Canada|BOLD\_AAH3983  
Ctenosciara hyalipennis|CNPEQ157-14|Canada|BOLD\_AAH3983  
Ctenosciara hyalipennis|CNBRK310-14|Canada|BOLD\_AAH3983  
Ctenosciara hyalipennis|CNBRK341-14|Canada|BOLD\_AAH3983  
Ctenosciara hyalipennis|CNBRK364-14|Canada|BOLD\_AAH3983  
Ctenosciara hyalipennis|CNPEL738-14|Canada|BOLD\_AAH3983  
Ctenosciara hyalipennis|CNPED399-14|Canada|BOLD\_AAH3983  
Ctenosciara hyalipennis|CNPED846-14|Canada|BOLD\_AAH3983  
Ctenosciara hyalipennis|CNBRG107-14|Canada|BOLD\_AAH3983  
Ctenosciara hyalipennis|CNBRG136-14|Canada|BOLD\_AAH3983  
Ctenosciara hyalipennis|CNPEB214-14|Canada|BOLD\_AAH3983  
Ctenosciara hyalipennis|CNPEB262-14|Canada|BOLD\_AAH3983  
Ctenosciara hyalipennis|CNPEB463-14|Canada|BOLD\_AAH3983  
Ctenosciara hyalipennis|CNPEB623-14|Canada|BOLD\_AAH3983  
Ctenosciara hyalipennis|CNBR302-14|Canada|BOLD\_AAH3983  
Ctenosciara hyalipennis|CNBR148-14|Canada|BOLD\_AAH3983  
Ctenosciara hyalipennis|CNBR152-14|Canada|BOLD\_AAH3983  
Ctenosciara hyalipennis|CNPEA102-14|Canada|BOLD\_AAH3983  
Ctenosciara hyalipennis|CNBRB198-14|Canada|BOLD\_AAH3983  
Ctenosciara hyalipennis|CNBRB220-14|Canada|BOLD\_AAH3983  
Ctenosciara hyalipennis|CNBRB227-14|Canada|BOLD\_AAH3983  
Ctenosciara hyalipennis|CNBRB261-14|Canada|BOLD\_AAH3983  
Ctenosciara hyalipennis|CNBRA161-14|Canada|BOLD\_AAH3983  
Ctenosciara hyalipennis|CNBRB127-14|Canada|BOLD\_AAH3983  
Ctenosciara hyalipennis|CNBRB141-14|Canada|BOLD\_AAH3983  
Ctenosciara hyalipennis|CNBRB166-14|Canada|BOLD\_AAH3983  
Ctenosciara hyalipennis|HPPPF005-13|Canada|BOLD\_AAH3983  
Ctenosciara hyalipennis|HPPPF211-13|Canada|BOLD\_AAH3983  
Ctenosciara hyalipennis|CNPEA566-14|Canada|BOLD\_AAH3983  
Ctenosciara hyalipennis|CNPEA648-14|Canada|BOLD\_AAH3983  
Ctenosciara hyalipennis|GMGRB609-13|Germany|BOLD\_AAH3983  
Ctenosciara hyalipennis|HPPPA021-13|Canada|BOLD\_AAH3983  
Ctenosciara hyalipennis|HPPPA037-13|Canada|BOLD\_AAH3983  
Ctenosciara hyalipennis|HPPPA080-13|Canada|BOLD\_AAH3983  
Ctenosciara hyalipennis|HPPPA062-13|Canada|BOLD\_AAH3983  
Ctenosciara hyalipennis|HPPPA064-13|Canada|BOLD\_AAH3983  
Ctenosciara hyalipennis|HPPPA069-13|Canada|BOLD\_AAH3983  
Ctenosciara hyalipennis|HPPPA075-13|Canada|BOLD\_AAH3983  
Ctenosciara hyalipennis|HPPPA053-13|Canada|BOLD\_AAH3983  
Ctenosciara hyalipennis|HPPPA054-13|Canada|BOLD\_AAH3983  
Ctenosciara hyalipennis|HPPPA055-13|Canada|BOLD\_AAH3983  
Ctenosciara hyalipennis|HPPPA058-13|Canada|BOLD\_AAH3983  
Ctenosciara hyalipennis|GMGRA474-13|Germany|BOLD\_AAH3983  
Ctenosciara hyalipennis|GMGRA737-13|Germany|BOLD\_AAH3983  
Ctenosciara hyalipennis|HPPPA187-13|Canada|BOLD\_AAH3983  
Ctenosciara hyalipennis|CNPEL1366-14|Canada|BOLD\_AAH3983  
Ctenosciara hyalipennis|CNPEQ166-14|Canada|BOLD\_AAH3983  
Ctenosciara hyalipennis|CNBRQ168-14|Canada|BOLD\_AAH3983  
Ctenosciara hyalipennis|SSBRB3248-14|Canada|BOLD\_AAH3983  
Ctenosciara hyalipennis|SSBRB3274-14|Canada|BOLD\_AAH3983  
Ctenosciara hyalipennis|HPPPA082-13|Canada|BOLD\_AAH3983  
Ctenosciara hyalipennis|HPPPM306-13|Canada|BOLD\_AAH3983  
Ctenosciara hyalipennis|HPPPA025-13|Canada|BOLD\_AAH3983  
Ctenosciara hyalipennis|HPPPA038-13|Canada|BOLD\_AAH3983  
Ctenosciara hyalipennis|HPPPJ327-13|Canada|BOLD\_AAH3983  
Ctenosciara hyalipennis|HPPPJ331-13|Canada|BOLD\_AAH3983  
Ctenosciara hyalipennis|HPPPA326-13|Canada|BOLD\_AAH3983  
Ctenosciara hyalipennis|HPPPA337-13|Canada|BOLD\_AAH3983  
Ctenosciara hyalipennis|HPPPA235-13|Canada|BOLD\_AAH3983  
Ctenosciara hyalipennis|CNPEL1718-14|Canada|BOLD\_AAH3983  
Ctenosciara hyalipennis|GMGRB190-13|Germany|BOLD\_AAH3983  
Ctenosciara hyalipennis|HPPPA002-13|Canada|BOLD\_AAH3983  
Ctenosciara hyalipennis|GMGRA229-13|Germany|BOLD\_AAH3983  
Ctenosciara hyalipennis|GMGRA649-13|Germany|BOLD\_AAH3983  
Ctenosciara hyalipennis|HPPPA071-13|Canada|BOLD\_AAH3983  
Ctenosciara hyalipennis|SSBRB3219-14|Canada|BOLD\_AAH3983  
Ctenosciara hyalipennis|HPPPA266-13|Canada|BOLD\_AAH3983  
Ctenosciara hyalipennis|HPPPE633-13|Canada|BOLD\_AAH3983  
Ctenosciara hyalipennis|HPPPA030-13|Canada|BOLD\_AAH3983  
Ctenosciara hyalipennis|HPPPA084-13|Canada|BOLD\_AAH3983  
Ctenosciara hyalipennis|GMGRB475-13|Germany|BOLD\_AAH3983  
Ctenosciara hyalipennis|CNBRK316-14|Canada|BOLD\_AAH3983  
Ctenosciara hyalipennis|CNBRP590-14|Canada|BOLD\_AAH3983  
Ctenosciara hyalipennis|CNBR3118-14|Canada|BOLD\_AAH3983  
Ctenosciara hyalipennis|HPPPA312-13|Canada|BOLD\_AAH3983  
Ctenosciara hyalipennis|CNBRK322-14|Canada|BOLD\_AAH3983  
Ctenosciara hyalipennis|HPPPA277-13|Canada|BOLD\_AAH3983  
Ctenosciara hyalipennis|HPPPA279-13|Canada|BOLD\_AAH3983  
Ctenosciara hyalipennis|HPPPA060-13|Canada|BOLD\_AAH3983  
Ctenosciara hyalipennis|HPPPA250-13|Canada|BOLD\_AAH3983  
Ctenosciara hyalipennis|HPPPM283-13|Canada|BOLD\_AAH3983  
Ctenosciara hyalipennis|CNBRL472-14|Canada|BOLD\_AAH3983  
Ctenosciara hyalipennis|CNBRK351-14|Canada|BOLD\_AAH3983  
Ctenosciara hyalipennis|CNBRN201-14|Canada|BOLD\_AAH3983  
Ctenosciara hyalipennis|CNBRK227-14|Canada|BOLD\_AAH3983

Ctenosciara hyalipennis|CNBRK351-14|Canada|BOLD\_AAH3983  
Ctenosciara hyalipennis|CNBRN201-14|Canada|BOLD\_AAH3983  
Ctenosciara hyalipennis|CNBRK337-14|Canada|BOLD\_AAH3983  
Ctenosciara hyalipennis|CNBRK349-14|Canada|BOLD\_AAH3983  
Ctenosciara hyalipennis|CNBRK321-14|Canada|BOLD\_AAH3983  
Ctenosciara hyalipennis|CNBRK326-14|Canada|BOLD\_AAH3983  
Ctenosciara hyalipennis|CNBRK288-14|Canada|BOLD\_AAH3983  
Ctenosciara hyalipennis|CNBRK306-14|Canada|BOLD\_AAH3983  
Ctenosciara hyalipennis|HPPPA380-13|Canada|BOLD\_AAH3983  
Ctenosciara hyalipennis|HPPPS019-13|Canada|BOLD\_AAH3983  
Ctenosciara hyalipennis|CNBRN227-14|Canada|BOLD\_AAH3983  
Ctenosciara hyalipennis|CNBRN234-14|Canada|BOLD\_AAH3983  
Ctenosciara hyalipennis|HPPPA293-13|Canada|BOLD\_AAH3983  
Ctenosciara hyalipennis|HPPPA334-13|Canada|BOLD\_AAH3983  
Ctenosciara hyalipennis|HPPPA079-13|Canada|BOLD\_AAH3983  
Ctenosciara hyalipennis|HPPPA241-13|Canada|BOLD\_AAH3983  
Ctenosciara hyalipennis|HPPPA004-13|Canada|BOLD\_AAH3983  
Ctenosciara hyalipennis|HPPPA070-13|Canada|BOLD\_AAH3983  
Ctenosciara hyalipennis|CNBRN212-14|Canada|BOLD\_AAH3983  
Ctenosciara hyalipennis|CNBRN226-14|Canada|BOLD\_AAH3983  
Ctenosciara hyalipennis|HPPPA347-13|Canada|BOLD\_AAH3983  
Ctenosciara hyalipennis|CNBRN192-14|Canada|BOLD\_AAH3983  
Ctenosciara hyalipennis|HPPPA068-13|Canada|BOLD\_AAH3983  
Ctenosciara hyalipennis|HPPPA072-13|Canada|BOLD\_AAH3983  
Ctenosciara hyalipennis|HPPPA036-13|Canada|BOLD\_AAH3983  
Ctenosciara hyalipennis|HPPPA046-13|Canada|BOLD\_AAH3983  
Ctenosciara hyalipennis|HPPPA022-13|Canada|BOLD\_AAH3983  
Ctenosciara hyalipennis|HPPPA026-13|Canada|BOLD\_AAH3983  
Ctenosciara hyalipennis|HPPPA063-13|Canada|BOLD\_AAH3983  
Ctenosciara hyalipennis|HPPPA261-13|Canada|BOLD\_AAH3983  
Ctenosciara hyalipennis|HPPPA078-13|Canada|BOLD\_AAH3983  
Ctenosciara hyalipennis|HPPPA093-13|Canada|BOLD\_AAH3983  
Ctenosciara hyalipennis|HPPPA045-13|Canada|BOLD\_AAH3983  
Ctenosciara hyalipennis|HPPPA049-13|Canada|BOLD\_AAH3983  
Ctenosciara hyalipennis|CNBRK445-14|Canada|BOLD\_AAH3983  
Ctenosciara hyalipennis|CNPEN170-14|Canada|BOLD\_AAH3983  
Ctenosciara hyalipennis|CNBRB121-14|Canada|BOLD\_AAH3983  
Ctenosciara hyalipennis|CNBRK325-14|Canada|BOLD\_AAH3983  
Ctenosciara hyalipennis|HPPPA161-13|Canada|BOLD\_AAH3983  
Ctenosciara hyalipennis|HPPPF385-13|Canada|BOLD\_AAH3983  
Ctenosciara hyalipennis|HPPPJ002-13|Canada|BOLD\_AAH3983  
Ctenosciara hyalipennis|HPPPJ155-13|Canada|BOLD\_AAH3983  
Ctenosciara hyalipennis|HPPPJ194-13|Canada|BOLD\_AAH3983  
Ctenosciara hyalipennis|HPPPK197-13|Canada|BOLD\_AAH3983  
Ctenosciara hyalipennis|HPPPS049-13|Canada|BOLD\_AAH3983  
Ctenosciara hyalipennis|CNPEA1025-14|Canada|BOLD\_AAH3983  
Ctenosciara hyalipennis|CNPEB119-14|Canada|BOLD\_AAH3983  
Ctenosciara hyalipennis|CNPEB288-14|Canada|BOLD\_AAH3983  
Ctenosciara hyalipennis|CNPEB315-14|Canada|BOLD\_AAH3983  
Ctenosciara hyalipennis|CNPEQ469-14|Canada|BOLD\_AAH3983  
Ctenosciara hyalipennis|CNBRP344-14|Canada|BOLD\_AAH3983  
Ctenosciara hyalipennis|HPPPA089-13|Canada|BOLD\_AAH3983  
Ctenosciara hyalipennis|HPPPA404-13|Canada|BOLD\_AAH3983  
Ctenosciara hyalipennis|CNBRB334-14|Canada|BOLD\_AAH3983  
Ctenosciara hyalipennis|GMGRB570-13|Germany|BOLD\_AAH3983  
Ctenosciara hyalipennis|GMGRA054-13|Germany|BOLD\_AAH3983  
Ctenosciara hyalipennis|HPPPA255-13|Canada|BOLD\_AAH3983  
Ctenosciara hyalipennis|HPPPA067-13|Canada|BOLD\_AAH3983  
Ctenosciara hyalipennis|HPPPA066-13|Canada|BOLD\_AAH3983  
Ctenosciara hyalipennis|HPPPA065-13|Canada|BOLD\_AAH3983  
Ctenosciara hyalipennis|GBMWN1426-15|Germany|BOLD\_AAH3983  
Ctenosciara hyalipennis|HPPPA244-13|Canada|BOLD\_AAH3983  
Ctenosciara hyalipennis|HPPPA224-13|Canada|BOLD\_AAH3983  
Ctenosciara hyalipennis|HPPPA214-13|Canada|BOLD\_AAH3983  
Ctenosciara hyalipennis|HPPPA212-13|Canada|BOLD\_AAH3983  
Ctenosciara hyalipennis|HPPPA194-13|Canada|BOLD\_AAH3983  
Ctenosciara hyalipennis|HPPPA219-13|Canada|BOLD\_AAH3983  
Ctenosciara hyalipennis|HPPPF706-13|Canada|BOLD\_AAH3983  
Ctenosciara hyalipennis|HPPPS127-13|Canada|BOLD\_AAH3983  
Ctenosciara hyalipennis|SSBRB474-14|Canada|BOLD\_AAH3983  
Ctenosciara hyalipennis|GBMWN576-15|Germany|BOLD\_AAH3983  
Ctenosciara hyalipennis|GBMWN549-15|Germany|BOLD\_AAH3983  
Ctenosciara hyalipennis|CNBRB354-14|Canada|BOLD\_AAH3983  
Ctenosciara hyalipennis|CNBRB295-14|Canada|BOLD\_AAH3983  
Ctenosciara hyalipennis|CNBRB278-14|Canada|BOLD\_AAH3983  
Ctenosciara hyalipennis|CNBRB244-14|Canada|BOLD\_AAH3983  
Ctenosciara hyalipennis|CNBRA065-14|Canada|BOLD\_AAH3983  
Ctenosciara hyalipennis|HPPPE519-13|Canada|BOLD\_AAH3983  
Ctenosciara hyalipennis|CNPEL519-14|Canada|BOLD\_AAH3983  
Ctenosciara hyalipennis|GBMWN464-15|Germany|BOLD\_AAH3983  
Ctenosciara hyalipennis|GBMWN391-15|Germany|BOLD\_AAH3983  
Ctenosciara hyalipennis|GBMWN388-15|Germany|BOLD\_AAH3983  
Ctenosciara hyalipennis|HPPPA024-13|Canada|BOLD\_AAH3983  
Ctenosciara hyalipennis|HPPPA282-13|Canada|BOLD\_AAH3983  
Ctenosciara hyalipennis|CNPEG267-14|Canada|BOLD\_AAH3983  
Ctenosciara hyalipennis|CNPEQ140-14|Canada|BOLD\_AAH3983  
Ctenosciara hyalipennis|HPPPA294-13|Canada|BOLD\_AAH3983  
Ctenosciara hyalipennis|CNBRR158-14|Canada|BOLD\_AAH3983  
Ctenosciara hyalipennis|HPPPA465-13|Canada|BOLD\_AAH3983  
Ctenosciara hyalipennis|SSBRB270-14|Canada|BOLD\_AAH3983  
Ctenosciara hyalipennis|HPPPA083-13|Canada|BOLD\_AAH3983  
Ctenosciara hyalipennis|CNBRG096-14|Canada|BOLD\_AAH3983  
Ctenosciara hyalipennis|SSBRB570-14|Canada|BOLD\_AAH3983  
Ctenosciara hyalipennis|SSBRC1147-14|Canada|BOLD\_AAH3983  
Ctenosciara hyalipennis|GBMWN384-15|Germany|BOLD\_AAH3983  
Ctenosciara hyalipennis|GBMWN356-15|Germany|BOLD\_AAH3983  
Ctenosciara hyalipennis|GBMWN346-15|Germany|BOLD\_AAH3983  
Ctenosciara hyalipennis|GBMWN339-15|Germany|BOLD\_AAH3983  
Ctenosciara hyalipennis|GBMWN329-15|Germany|BOLD\_AAH3983  
Ctenosciara hyalipennis|CNPEB932-14|Canada|BOLD\_AAH3983  
Ctenosciara hyalipennis|SSFDC3434-14|Canada|BOLD\_AAH3983

Ctenosciara hyalipennis(GBMW N.529-13)(Germany|BOLD\_AAH3983  
Ctenosciara hyalipennis(CNPEB932-14|Canada|BOLD\_AAH3983  
Ctenosciara hyalipennis(SSFDC3434-14|Canada|BOLD\_AAH3983  
Ctenosciara hyalipennis(SSFDC4270-14|Canada|BOLD\_AAH3983  
Ctenosciara hyalipennis(GMGRB295-13|Germany|BOLD\_AAH3983  
Ctenosciara hyalipennis(CNKJB061-14|Canada|BOLD\_AAH3983  
Ctenosciara hyalipennis(GMGRB280-13|Germany|BOLD\_AAH3983  
Ctenosciara hyalipennis(GMGRA258-13|Germany|BOLD\_AAH3983  
Ctenosciara hyalipennis(SSFDC4274-14|Canada|BOLD\_AAH3983  
Ctenosciara hyalipennis(SSFDC4038-14|Canada|BOLD\_AAH3983  
Ctenosciara hyalipennis(SSFDC4110-14|Canada|BOLD\_AAH3983  
Ctenosciara hyalipennis(CNKJB15-14|Canada|BOLD\_AAH3983  
Ctenosciara hyalipennis(SSFDC4015-14|Canada|BOLD\_AAH3983  
Ctenosciara hyalipennis(GMGRA1186-13|Germany|BOLD\_AAH3983  
Ctenosciara hyalipennis(GMGRA294-13|Germany|BOLD\_AAH3983  
Ctenosciara hyalipennis(CNKJB353-14|Canada|BOLD\_AAH3983  
Ctenosciara hyalipennis(SSFDC4561-14|Canada|BOLD\_AAH3983  
Ctenosciara hyalipennis(GMGRA395-13|Germany|BOLD\_AAH3983  
Ctenosciara hyalipennis(CNKJA271-14|Canada|BOLD\_AAH3983  
Ctenosciara hyalipennis(CNKJB454-14|Canada|BOLD\_AAH3983  
Ctenosciara hyalipennis(CNPEM3070-14|Canada|BOLD\_AAH3983  
Ctenosciara hyalipennis(CNKJA185-14|Canada|BOLD\_AAH3983  
Ctenosciara hyalipennis(GMGRB681-13|Germany|BOLD\_AAH3983  
Ctenosciara hyalipennis(SSFDC4276-14|Canada|BOLD\_AAH3983  
Ctenosciara hyalipennis(GMGRA673-13|Germany|BOLD\_AAH3983  
Ctenosciara hyalipennis(GMGRA1277-13|Germany|BOLD\_AAH3983  
Ctenosciara hyalipennis(GMGRA829-13|Germany|BOLD\_AAH3983  
Ctenosciara hyalipennis(GMGRB520-13|Germany|BOLD\_AAH3983  
Ctenosciara hyalipennis(GMGRA1327-13|Germany|BOLD\_AAH3983  
Ctenosciara hyalipennis(GMGRA659-13|Germany|BOLD\_AAH3983  
Ctenosciara hyalipennis(GMGRA644-13|Germany|BOLD\_AAH3983  
Ctenosciara hyalipennis(GMGRA228-13|Germany|BOLD\_AAH3983  
Ctenosciara hyalipennis(GMGRA091-13|Germany|BOLD\_AAH3983  
Ctenosciara hyalipennis(SSFDC4224-14|Canada|BOLD\_AAH3983  
Ctenosciara hyalipennis(SSFDC3950-14|Canada|BOLD\_AAH3983  
Ctenosciara hyalipennis(SSFDC3024-14|Canada|BOLD\_AAH3983  
Ctenosciara hyalipennis(SSFDC4242-14|Canada|BOLD\_AAH3983  
Ctenosciara hyalipennis(SSFDC3474-14|Canada|BOLD\_AAH3983  
Ctenosciara hyalipennis(SSFDC3505-14|Canada|BOLD\_AAH3983  
Ctenosciara hyalipennis(SSFDC4665-14|Canada|BOLD\_AAH3983  
Ctenosciara hyalipennis(CNPEC1621-14|Canada|BOLD\_AAH3983  
Ctenosciara hyalipennis(CNBRL558-14|Canada|BOLD\_AAH3983  
Ctenosciara hyalipennis(CNPEB1577-14|Canada|BOLD\_AAH3983  
Ctenosciara hyalipennis(SSFDC4144-14|Canada|BOLD\_AAH3983  
Ctenosciara hyalipennis(SSFDC4250-14|Canada|BOLD\_AAH3983  
Ctenosciara hyalipennis(CNPEB1740-14|Canada|BOLD\_AAH3983  
Ctenosciara hyalipennis(CNKJA168-14|Canada|BOLD\_AAH3983  
Ctenosciara hyalipennis(CNPEN271-14|Canada|BOLD\_AAH3983  
Ctenosciara hyalipennis(CNPEB1149-14|Canada|BOLD\_AAH3983  
Ctenosciara hyalipennis(CNPEG089-14|Canada|BOLD\_AAH3983  
Ctenosciara hyalipennis(CNPEB960-14|Canada|BOLD\_AAH3983  
Ctenosciara hyalipennis(CNKJB030-14|Canada|BOLD\_AAH3983  
Ctenosciara hyalipennis(SSFDC589-14|Canada|BOLD\_AAH3983  
Ctenosciara hyalipennis(CNRVG1770-15|Canada|BOLD\_AAH3983  
Ctenosciara hyalipennis(CNGAI201-15|Canada|BOLD\_AAH3983  
Ctenosciara hyalipennis(CNPEQ036-14|Canada|BOLD\_AAH3983  
Ctenosciara hyalipennis(CNPEL757-14|Canada|BOLD\_AAH3983  
Ctenosciara hyalipennis(SSFDB1270-14|Canada|BOLD\_AAH3983  
Ctenosciara hyalipennis(CNPEB1671-14|Canada|BOLD\_AAH3983  
Ctenosciara hyalipennis(CNPEB1679-14|Canada|BOLD\_AAH3983  
Ctenosciara hyalipennis(CNPEB939-14|Canada|BOLD\_AAH3983  
Ctenosciara hyalipennis(CNPEB1117-14|Canada|BOLD\_AAH3983  
Ctenosciara hyalipennis(CNPEB190-14|Canada|BOLD\_AAH3983  
Ctenosciara hyalipennis(CNPEB275-14|Canada|BOLD\_AAH3983  
Ctenosciara hyalipennis(CNBRB303-14|Canada|BOLD\_AAH3983  
Ctenosciara hyalipennis(CNPEB076-14|Canada|BOLD\_AAH3983  
Ctenosciara hyalipennis(CNFDC195-14|Canada|BOLD\_AAH3983  
Ctenosciara hyalipennis(CNFDI092-14|Canada|BOLD\_AAH3983  
Ctenosciara hyalipennis(GMGRG331-13|Germany|BOLD\_AAH3983  
Ctenosciara hyalipennis(CNFDL459-14|Canada|BOLD\_AAH3983  
Ctenosciara hyalipennis(CNPEB704-14|Canada|BOLD\_AAH3983  
Ctenosciara hyalipennis(CNPEB756-14|Canada|BOLD\_AAH3983  
Ctenosciara hyalipennis(CNPEB637-14|Canada|BOLD\_AAH3983  
Ctenosciara hyalipennis(CNPEB639-14|Canada|BOLD\_AAH3983  
Ctenosciara hyalipennis(CNPEB296-14|Canada|BOLD\_AAH3983  
Ctenosciara hyalipennis(CNPEB308-14|Canada|BOLD\_AAH3983  
Ctenosciara hyalipennis(CNPEA670-14|Canada|BOLD\_AAH3983  
Ctenosciara hyalipennis(CNPEB258-14|Canada|BOLD\_AAH3983  
Ctenosciara hyalipennis(CNPEA080-14|Canada|BOLD\_AAH3983  
Ctenosciara hyalipennis(CNPEA127-14|Canada|BOLD\_AAH3983  
Ctenosciara hyalipennis(CNPEB1546-14|Canada|BOLD\_AAH3983  
Ctenosciara hyalipennis(CNPEB1566-14|Canada|BOLD\_AAH3983  
Ctenosciara hyalipennis(CNPEB943-14|Canada|BOLD\_AAH3983  
Ctenosciara hyalipennis(CNPEB1021-14|Canada|BOLD\_AAH3983  
Ctenosciara hyalipennis(CNPEB782-14|Canada|BOLD\_AAH3983  
Ctenosciara hyalipennis(CNPEB886-14|Canada|BOLD\_AAH3983  
Ctenosciara hyalipennis(CNPEB1576-14|Canada|BOLD\_AAH3983  
Ctenosciara hyalipennis(CNPEB1582-14|Canada|BOLD\_AAH3983  
Ctenosciara hyalipennis(CNPEB1592-14|Canada|BOLD\_AAH3983  
Ctenosciara hyalipennis(CNPEB779-14|Canada|BOLD\_AAH3983  
Ctenosciara hyalipennis(CNBRK406-14|Canada|BOLD\_AAH3983  
Ctenosciara hyalipennis(CNPEQ343-14|Canada|BOLD\_AAH3983  
Ctenosciara hyalipennis(CNPEQ393-14|Canada|BOLD\_AAH3983  
Ctenosciara hyalipennis(SSFDB193-14|Canada|BOLD\_AAH3983  
Ctenosciara hyalipennis(SSFDB1299-14|Canada|BOLD\_AAH3983  
Ctenosciara hyalipennis(SSFDB1334-14|Canada|BOLD\_AAH3983  
Ctenosciara hyalipennis(SSFDB1345-14|Canada|BOLD\_AAH3983  
Ctenosciara hyalipennis(SSFDB1377-14|Canada|BOLD\_AAH3983  
Ctenosciara hyalipennis(SSFDC3241-14|Canada|BOLD\_AAH3983  
Ctenosciara hyalipennis(SSFDC3335-14|Canada|BOLD\_AAH3983  
Ctenosciara hyalipennis(SSFDB1316-14|Canada|BOLD\_AAH3983  
Ctenosciara hyalipennis(SSFDC3382-14|Canada|BOLD\_AAH3983



Ctenosciara hyalipennis|SSFDC4592-14|Canada|BOLD\_AAH3983  
Ctenosciara hyalipennis|SSFDC4614-14|Canada|BOLD\_AAH3983  
Ctenosciara hyalipennis|SSFDC4626-14|Canada|BOLD\_AAH3983  
Ctenosciara hyalipennis|SSFDC4627-14|Canada|BOLD\_AAH3983  
Ctenosciara hyalipennis|SSFDC4628-14|Canada|BOLD\_AAH3983  
Ctenosciara hyalipennis|SSFDC4667-14|Canada|BOLD\_AAH3983  
Ctenosciara hyalipennis|SSFDC4800-14|Canada|BOLD\_AAH3983  
Ctenosciara hyalipennis|SMTPJ5714-14|Canada|BOLD\_AAH3983  
Ctenosciara hyalipennis|CNRVF171-15|Canada|BOLD\_AAH3983  
Ctenosciara hyalipennis|CNRVG787-15|Canada|BOLD\_AAH3983  
Ctenosciara hyalipennis|CNPEL553-14|Canada|BOLD\_AAH3983  
Ctenosciara hyalipennis|CNPEL601-14|Canada|BOLD\_AAH3983  
Ctenosciara hyalipennis|CNPEL063-14|Canada|BOLD\_AAH3983  
Ctenosciara hyalipennis|CNPEL249-14|Canada|BOLD\_AAH3983  
Ctenosciara hyalipennis|CNPEL1575-14|Canada|BOLD\_AAH3983  
Ctenosciara hyalipennis|CNPEL1578-14|Canada|BOLD\_AAH3983  
Ctenosciara hyalipennis|CNPEL1091-14|Canada|BOLD\_AAH3983  
Ctenosciara hyalipennis|CNPEL1235-14|Canada|BOLD\_AAH3983  
Ctenosciara hyalipennis|CNPEL1032-14|Canada|BOLD\_AAH3983  
Ctenosciara hyalipennis|CNPEL1076-14|Canada|BOLD\_AAH3983  
Ctenosciara hyalipennis|SSFDC4756-14|Canada|BOLD\_AAH3983  
Ctenosciara hyalipennis|SSFDC4765-14|Canada|BOLD\_AAH3983  
Ctenosciara hyalipennis|GMGRG1940-13|Germany|BOLD\_AAH3983  
Ctenosciara hyalipennis|CNFDB143-14|Canada|BOLD\_AAH3983  
Ctenosciara hyalipennis|SSFDC4754-14|Canada|BOLD\_AAH3983  
Ctenosciara hyalipennis|SSFDC4755-14|Canada|BOLD\_AAH3983  
Ctenosciara hyalipennis|GMGRG1248-13|Germany|BOLD\_AAH3983  
Ctenosciara hyalipennis|GMGRG1605-13|Germany|BOLD\_AAH3983  
Ctenosciara hyalipennis|CNFDB186-14|Canada|BOLD\_AAH3983  
Ctenosciara hyalipennis|GMGRG735-13|Germany|BOLD\_AAH3983  
Ctenosciara hyalipennis|GMGRG1623-13|Germany|BOLD\_AAH3983  
Ctenosciara hyalipennis|SSFDC4037-14|Canada|BOLD\_AAH3983  
Ctenosciara hyalipennis|SSFDC5933-14|Canada|BOLD\_AAH3983  
Ctenosciara hyalipennis|SSFDC4769-14|Canada|BOLD\_AAH3983  
Ctenosciara hyalipennis|SSFDC4054-14|Canada|BOLD\_AAH3983  
Ctenosciara hyalipennis|SSFDC4810-14|Canada|BOLD\_AAH3983  
Ctenosciara hyalipennis|SSFDC806-14|Canada|BOLD\_AAH3983  
Ctenosciara hyalipennis|CNPEL1712-14|Canada|BOLD\_AAH3983  
Ctenosciara hyalipennis|CNPEL1408-14|Canada|BOLD\_AAH3983  
Ctenosciara hyalipennis|CNPEL1169-14|Canada|BOLD\_AAH3983  
Ctenosciara hyalipennis|CNPEL394-14|Canada|BOLD\_AAH3983  
Ctenosciara hyalipennis|CNKJB320-14|Canada|BOLD\_AAH3983  
Ctenosciara hyalipennis|SSFDB432-14|Canada|BOLD\_AAH3983  
Ctenosciara hyalipennis|CNPEB1124-14|Canada|BOLD\_AAH3983  
Ctenosciara hyalipennis|BBDEE274-10|Canada|BOLD\_AAH3983  
Ctenosciara hyalipennis|BBDED382-10|Canada|BOLD\_AAH3983  
Ctenosciara hyalipennis|BBDED381-10|Canada|BOLD\_AAH3983  
Ctenosciara hyalipennis|GMGRF826-13|Germany|BOLD\_AAH3983  
Ctenosciara hyalipennis|CNKJ078-14|Canada|BOLD\_AAH3983  
Ctenosciara hyalipennis|CNPEN138-14|Canada|BOLD\_AAH3983  
Ctenosciara hyalipennis|CNPEB1066-14|Canada|BOLD\_AAH3983  
Ctenosciara hyalipennis|CNPEL767-14|Canada|BOLD\_AAH3983  
Ctenosciara hyalipennis|CNPEB723-14|Canada|BOLD\_AAH3983  
Ctenosciara hyalipennis|CNPEB981-14|Canada|BOLD\_AAH3983  
Ctenosciara hyalipennis|CNPEB638-14|Canada|BOLD\_AAH3983  
Ctenosciara hyalipennis|CNPEB675-14|Canada|BOLD\_AAH3983  
Ctenosciara hyalipennis|CNPEB085-14|Canada|BOLD\_AAH3983  
Ctenosciara hyalipennis|CNPEB587-14|Canada|BOLD\_AAH3983  
Ctenosciara hyalipennis|GMGRG377-13|Germany|BOLD\_AAH3983  
Ctenosciara hyalipennis|GMGRG155-13|Germany|BOLD\_AAH3983  
Ctenosciara hyalipennis|CNPED406-14|Canada|BOLD\_AAH3983  
Ctenosciara hyalipennis|GMGRF1768-13|Germany|BOLD\_AAH3983  
Ctenosciara hyalipennis|CNKJA098-14|Canada|BOLD\_AAH3983  
Ctenosciara hyalipennis|CNPEB507-14|Canada|BOLD\_AAH3983  
Ctenosciara hyalipennis|SSFDC4731-14|Canada|BOLD\_AAH3983  
Ctenosciara hyalipennis|SSFDC4344-14|Canada|BOLD\_AAH3983  
Ctenosciara hyalipennis|SSFDC4342-14|Canada|BOLD\_AAH3983  
Ctenosciara hyalipennis|SSFDC4152-14|Canada|BOLD\_AAH3983  
Ctenosciara hyalipennis|CNPEL887-14|Canada|BOLD\_AAH3983  
Ctenosciara hyalipennis|CNPEL940-14|Canada|BOLD\_AAH3983  
Ctenosciara hyalipennis|CNPEL477-14|Canada|BOLD\_AAH3983  
Ctenosciara hyalipennis|CNPEL499-14|Canada|BOLD\_AAH3983  
Ctenosciara hyalipennis|CNRVE2561-15|Canada|BOLD\_AAH3983  
Ctenosciara hyalipennis|SSPEA293-15|Canada|BOLD\_AAH3983  
Ctenosciara hyalipennis|CNPEL520-14|Canada|BOLD\_AAH3983  
Ctenosciara hyalipennis|CNPEL575-14|Canada|BOLD\_AAH3983  
Ctenosciara hyalipennis|SSFDC626-14|Canada|BOLD\_AAH3983  
Ctenosciara hyalipennis|SSFDC3564-14|Canada|BOLD\_AAH3983  
Ctenosciara hyalipennis|GMGRG2032-13|Germany|BOLD\_AAH3983  
Ctenosciara hyalipennis|CNPEL263-14|Canada|BOLD\_AAH3983  
Ctenosciara hyalipennis|GMGRF3016-13|Germany|BOLD\_AAH3983  
Ctenosciara hyalipennis|CNPEB1516-14|Canada|BOLD\_AAH3983  
Ctenosciara hyalipennis|CNPEL1304-14|Canada|BOLD\_AAH3983  
Ctenosciara hyalipennis|CNPEM524-14|Canada|BOLD\_AAH3983  
Ctenosciara hyalipennis|SSPEA314-15|Canada|BOLD\_AAH3983  
Ctenosciara hyalipennis|CNPEB428-14|Canada|BOLD\_AAH3983  
Ctenosciara hyalipennis|CNFDC138-14|Canada|BOLD\_AAH3983  
Ctenosciara hyalipennis|CNPEB1732-14|Canada|BOLD\_AAH3983  
Ctenosciara hyalipennis|CNPEM3062-14|Canada|BOLD\_AAH3983  
Ctenosciara hyalipennis|CNPEB1255-14|Canada|BOLD\_AAH3983  
Ctenosciara hyalipennis|CNPEB1726-14|Canada|BOLD\_AAH3983  
Ctenosciara hyalipennis|CNPEB1521-14|Canada|BOLD\_AAH3983  
Ctenosciara hyalipennis|CNPEB599-14|Canada|BOLD\_AAH3983  
Ctenosciara hyalipennis|CNPEB556-14|Canada|BOLD\_AAH3983  
Ctenosciara hyalipennis|CNPEB522-14|Canada|BOLD\_AAH3983  
Ctenosciara hyalipennis|CNPEB424-14|Canada|BOLD\_AAH3983  
Ctenosciara hyalipennis|CNPEB415-14|Canada|BOLD\_AAH3983  
Ctenosciara hyalipennis|GMGRG130-13|Germany|BOLD\_AAH3983  
Ctenosciara hyalipennis|CNKJA114-14|Canada|BOLD\_AAH3983  
Ctenosciara hyalipennis|CNKJB227-14|Canada|BOLD\_AAH3983  
Ctenosciara hyalipennis|GMGRG565-13|Germany|BOLD\_AAH3983  
Ctenosciara hyalipennis|GMGRG519-13|Germany|BOLD\_AAH3983

Ctenosciara hyalipennis|CNKJB227-14|Canada|BOLD\_AAH3983  
Ctenosciara hyalipennis|GMGRG565-13|Germany|BOLD\_AAH3983  
Ctenosciara hyalipennis|GMGRG318-13|Germany|BOLD\_AAH3983  
Ctenosciara hyalipennis|GMGRG146-13|Germany|BOLD\_AAH3983  
Ctenosciara hyalipennis|CNPEB1503-14|Canada|BOLD\_AAH3983  
Ctenosciara hyalipennis|SSFDC2651-14|Canada|BOLD\_AAH3983  
Ctenosciara hyalipennis|CNFDL467-14|Canada|BOLD\_AAH3983  
Ctenosciara hyalipennis|CNPEL1501-14|Canada|BOLD\_AAH3983  
Ctenosciara hyalipennis|CNFDL508-14|Canada|BOLD\_AAH3983  
Ctenosciara hyalipennis|CNFDL502-14|Canada|BOLD\_AAH3983  
Ctenosciara hyalipennis|SSFDC4434-14|Canada|BOLD\_AAH3983  
Ctenosciara hyalipennis|SSFDC3989-14|Canada|BOLD\_AAH3983  
Ctenosciara hyalipennis|SSFDC3945-14|Canada|BOLD\_AAH3983  
Ctenosciara hyalipennis|SSFDC1614-14|Canada|BOLD\_AAH3983  
Ctenosciara hyalipennis|SSFDB1321-14|Canada|BOLD\_AAH3983  
Ctenosciara hyalipennis|SSFDC2607-14|Canada|BOLD\_AAH3983  
Ctenosciara hyalipennis|CNPEL725-14|Canada|BOLD\_AAH3983  
Ctenosciara hyalipennis|CNPEB271-14|Canada|BOLD\_AAH3983  
Ctenosciara hyalipennis|CNPEU149-14|Canada|BOLD\_AAH3983  
Ctenosciara hyalipennis|CNPEQ318-14|Canada|BOLD\_AAH3983  
Ctenosciara hyalipennis|GMGRG601-13|Germany|BOLD\_AAH3983  
Ctenosciara hyalipennis|CNPEB899-14|Canada|BOLD\_AAH3983  
Ctenosciara hyalipennis|SSFDC4527-14|Canada|BOLD\_AAH3983  
Ctenosciara hyalipennis|SSFDC4661-14|Canada|BOLD\_AAH3983  
Ctenosciara hyalipennis|CNPEL1728-14|Canada|BOLD\_AAH3983  
Ctenosciara hyalipennis|SSFDC3987-14|Canada|BOLD\_AAH3983  
Ctenosciara hyalipennis|CNPEL666-14|Canada|BOLD\_AAH3983  
Ctenosciara hyalipennis|CNPEL1309-14|Canada|BOLD\_AAH3983  
Ctenosciara hyalipennis|SSFDB1893-14|Canada|BOLD\_AAH3983  
Ctenosciara hyalipennis|SSFDC1011-14|Canada|BOLD\_AAH3983  
Ctenosciara hyalipennis|CNRVF438-15|Canada|BOLD\_AAH3983  
Ctenosciara hyalipennis|CNPEL094-14|Canada|BOLD\_AAH3983  
Ctenosciara hyalipennis|SSFDB1730-14|Canada|BOLD\_AAH3983  
Ctenosciara hyalipennis|CNKJF1001-14|Canada|BOLD\_AAH3983  
Ctenosciara hyalipennis|CNKJF910-14|Canada|BOLD\_AAH3983  
Ctenosciara hyalipennis|CNPEM1990-14|Canada|BOLD\_AAH3983  
Ctenosciara hyalipennis|CNPEL1426-14|Canada|BOLD\_AAH3983  
Ctenosciara hyalipennis|CNPEL228-14|Canada|BOLD\_AAH3983  
Ctenosciara hyalipennis|SSFDC4526-14|Canada|BOLD\_AAH3983  
Ctenosciara hyalipennis|SSFDC4427-14|Canada|BOLD\_AAH3983  
Ctenosciara hyalipennis|CNPEL1144-14|Canada|BOLD\_AAH3983  
Ctenosciara hyalipennis|CNPEG391-14|Canada|BOLD\_AAH3983  
Ctenosciara hyalipennis|CNPEL1587-14|Canada|BOLD\_AAH3983  
Ctenosciara hyalipennis|SSFDC4249-14|Canada|BOLD\_AAH3983  
Ctenosciara hyalipennis|CNTIF1892-15|Canada|BOLD\_AAH3983  
Ctenosciara hyalipennis|SSPEA378-15|Canada|BOLD\_AAH3983  
Ctenosciara hyalipennis|SSFDC4706-14|Canada|BOLD\_AAH3983  
Ctenosciara hyalipennis|SSFDC4644-14|Canada|BOLD\_AAH3983  
Ctenosciara hyalipennis|SSFDC4386-14|Canada|BOLD\_AAH3983  
Ctenosciara hyalipennis|CNKJA027-14|Canada|BOLD\_AAH3983  
Ctenosciara hyalipennis|CNPEM726-14|Canada|BOLD\_AAH3983  
Ctenosciara hyalipennis|CNPEL1896-14|Canada|BOLD\_AAH3983  
Ctenosciara hyalipennis|CNPEL815-14|Canada|BOLD\_AAH3983  
Ctenosciara hyalipennis|CNPEB906-14|Canada|BOLD\_AAH3983  
Ctenosciara hyalipennis|CNPEL1823-14|Canada|BOLD\_AAH3983  
Ctenosciara hyalipennis|CNPEL1252-14|Canada|BOLD\_AAH3983  
Ctenosciara hyalipennis|SSFDC1033-14|Canada|BOLD\_AAH3983  
Ctenosciara hyalipennis|SSFDC5922-14|Canada|BOLD\_AAH3983  
Ctenosciara hyalipennis|SSFDC5894-14|Canada|BOLD\_AAH3983  
Ctenosciara hyalipennis|SSFDC4210-14|Canada|BOLD\_AAH3983  
Ctenosciara hyalipennis|SSFDC4180-14|Canada|BOLD\_AAH3983  
Ctenosciara hyalipennis|SSFDC4094-14|Canada|BOLD\_AAH3983  
Ctenosciara hyalipennis|SSFDC4047-14|Canada|BOLD\_AAH3983  
Ctenosciara hyalipennis|SSFDC4020-14|Canada|BOLD\_AAH3983  
Ctenosciara hyalipennis|SSFDC4001-14|Canada|BOLD\_AAH3983  
Ctenosciara hyalipennis|CNFDB074-14|Canada|BOLD\_AAH3983  
Ctenosciara hyalipennis|CNPEB1063-14|Canada|BOLD\_AAH3983  
Ctenosciara hyalipennis|CNPEB655-14|Canada|BOLD\_AAH3983  
Ctenosciara hyalipennis|SSFDC5797-14|Canada|BOLD\_AAH3983  
Ctenosciara hyalipennis|SSFDC5775-14|Canada|BOLD\_AAH3983  
Ctenosciara hyalipennis|SSFDC5759-14|Canada|BOLD\_AAH3983  
Ctenosciara hyalipennis|SSFDC5473-14|Canada|BOLD\_AAH3983  
Ctenosciara hyalipennis|SSFDC4476-14|Canada|BOLD\_AAH3983  
Ctenosciara hyalipennis|SSFDC2877-14|Canada|BOLD\_AAH3983  
Ctenosciara hyalipennis|SSFDB2674-14|Canada|BOLD\_AAH3983  
Ctenosciara hyalipennis|SSBRB3953-14|Canada|BOLD\_AAH3983  
Ctenosciara hyalipennis|CNKJN1031-14|Canada|BOLD\_AAH3983  
Ctenosciara hyalipennis|CNKJB319-14|Canada|BOLD\_AAH3983  
Ctenosciara hyalipennis|CNKJB282-14|Canada|BOLD\_AAH3983  
Ctenosciara hyalipennis|CNPEM2960-14|Canada|BOLD\_AAH3983  
Ctenosciara hyalipennis|CNPEM2299-14|Canada|BOLD\_AAH3983  
Ctenosciara hyalipennis|CNPEM681-14|Canada|BOLD\_AAH3983  
Ctenosciara hyalipennis|CNPEL1692-14|Canada|BOLD\_AAH3983  
Ctenosciara hyalipennis|CNPEL1689-14|Canada|BOLD\_AAH3983  
Ctenosciara hyalipennis|CNPEL559-14|Canada|BOLD\_AAH3983  
Ctenosciara hyalipennis|GMGRG2364-13|Germany|BOLD\_AAH3983  
Ctenosciara hyalipennis|GMGRG1628-13|Germany|BOLD\_AAH3983  
Ctenosciara hyalipennis|GMGRG1282-13|Germany|BOLD\_AAH3983  
Ctenosciara hyalipennis|SSFDC4311-14|Canada|BOLD\_AAH3983  
Ctenosciara hyalipennis|CNPEB1163-14|Canada|BOLD\_AAH3983  
Ctenosciara hyalipennis|CNPEB390-14|Canada|BOLD\_AAH3983  
Ctenosciara hyalipennis|SSFDC5734-14|Canada|BOLD\_AAH3983  
Ctenosciara hyalipennis|SSPEA375-15|Canada|BOLD\_AAH3983  
Ctenosciara hyalipennis|SSFDC2924-14|Canada|BOLD\_AAH3983  
Ctenosciara hyalipennis|SSFDC649-14|Canada|BOLD\_AAH3983  
Ctenosciara hyalipennis|SSFDA715-14|Canada|BOLD\_AAH3983  
Ctenosciara hyalipennis|CNKJ028-14|Canada|BOLD\_AAH3983  
Ctenosciara hyalipennis|CNPEL1816-14|Canada|BOLD\_AAH3983  
Ctenosciara hyalipennis|GMGRG3469-13|Germany|BOLD\_AAH3983  
Ctenosciara hyalipennis|CNPEB259-14|Canada|BOLD\_AAH3983  
Ctenosciara hyalipennis|CNPEB247-14|Canada|BOLD\_AAH3983



Ctenosciara hyalipennis|GMGRG3409-13|Germany|BOLD\_AAH3983  
Ctenosciara hyalipennis|CNPEB259-14|Canada|BOLD\_AAH3983  
Ctenosciara hyalipennis|CNPEB247-14|Canada|BOLD\_AAH3983  
Ctenosciara hyalipennis|SSFDC2644-14|Canada|BOLD\_AAH3983  
Ctenosciara hyalipennis|CNPEB1725-14|Canada|BOLD\_AAH3983  
Ctenosciara hyalipennis|CNKJB210-14|Canada|BOLD\_AAH3983  
Ctenosciara hyalipennis|GMGRF1349-13|Germany|BOLD\_AAH3983  
Ctenosciara hyalipennis|GMGRF1218-13|Germany|BOLD\_AAH3983  
Ctenosciara hyalipennis|CNPEB161-14|Canada|BOLD\_AAH3983  
Ctenosciara hyalipennis|CNFDD064-14|Canada|BOLD\_AAH3983  
Ctenosciara hyalipennis|CNFDC133-14|Canada|BOLD\_AAH3983  
Ctenosciara hyalipennis|CNPEB1333-14|Canada|BOLD\_AAH3983  
Ctenosciara hyalipennis|CNPEB1276-14|Canada|BOLD\_AAH3983  
Ctenosciara hyalipennis|CNPEB1239-14|Canada|BOLD\_AAH3983  
Ctenosciara hyalipennis|CNPEB607-14|Canada|BOLD\_AAH3983  
Ctenosciara hyalipennis|CNPEB402-14|Canada|BOLD\_AAH3983  
Ctenosciara hyalipennis|CNPEL781-14|Canada|BOLD\_AAH3983  
Ctenosciara hyalipennis|CNPEB1203-14|Canada|BOLD\_AAH3983  
Ctenosciara hyalipennis|SSPEA880-15|Canada|BOLD\_AAH3983  
Ctenosciara hyalipennis|SSPEA304-15|Canada|BOLD\_AAH3983  
Ctenosciara hyalipennis|SSFDC5560-14|Canada|BOLD\_AAH3983  
Ctenosciara hyalipennis|SSFDC4559-14|Canada|BOLD\_AAH3983  
Ctenosciara hyalipennis|SSFDC898-14|Canada|BOLD\_AAH3983  
Ctenosciara hyalipennis|CNKJK980-14|Canada|BOLD\_AAH3983  
Ctenosciara hyalipennis|CNKJB327-14|Canada|BOLD\_AAH3983  
Ctenosciara hyalipennis|CNPEM1858-14|Canada|BOLD\_AAH3983  
Ctenosciara hyalipennis|CNPEL968-14|Canada|BOLD\_AAH3983  
Ctenosciara hyalipennis|CNPEB1174-14|Canada|BOLD\_AAH3983  
Ctenosciara hyalipennis|GMGRG885-13|Germany|BOLD\_AAH3983  
Ctenosciara hyalipennis|CNKJA056-14|Canada|BOLD\_AAH3983  
Ctenosciara hyalipennis|SSPEA258-15|Canada|BOLD\_AAH3983  
Ctenosciara hyalipennis|CNGUB234-14|Canada|BOLD\_AAH3983  
Ctenosciara hyalipennis|SSFDC5864-14|Canada|BOLD\_AAH3983  
Ctenosciara hyalipennis|SSFDC2934-14|Canada|BOLD\_AAH3983  
Ctenosciara hyalipennis|SSFDC2930-14|Canada|BOLD\_AAH3983  
Ctenosciara hyalipennis|SSFDC2926-14|Canada|BOLD\_AAH3983  
Ctenosciara hyalipennis|SSFDC835-14|Canada|BOLD\_AAH3983  
Ctenosciara hyalipennis|SSFDB632-14|Canada|BOLD\_AAH3983  
Ctenosciara hyalipennis|CNKJN1098-14|Canada|BOLD\_AAH3983  
Ctenosciara hyalipennis|CNKJK387-14|Canada|BOLD\_AAH3983  
Ctenosciara hyalipennis|GMGRG1075-13|Germany|BOLD\_AAH3983  
Ctenosciara hyalipennis|CNPER204-14|Canada|BOLD\_AAH3983  
Ctenosciara hyalipennis|SSFDC4002-14|Canada|BOLD\_AAH3983  
Ctenosciara hyalipennis|SSFDC4012-14|Canada|BOLD\_AAH3983  
Ctenosciara hyalipennis|CNPEM387-14|Canada|BOLD\_AAH3983  
Ctenosciara hyalipennis|SSFDC3978-14|Canada|BOLD\_AAH3983  
Ctenosciara hyalipennis|SSFDC4022-14|Canada|BOLD\_AAH3983  
Ctenosciara hyalipennis|CNKJB181-14|Canada|BOLD\_AAH3983  
Ctenosciara hyalipennis|SSFDC3363-14|Canada|BOLD\_AAH3983  
Ctenosciara hyalipennis|CNKJP806-14|Canada|BOLD\_AAH3983  
Ctenosciara hyalipennis|CNKJA164-14|Canada|BOLD\_AAH3983  
Ctenosciara hyalipennis|CNPEB1465-14|Canada|BOLD\_AAH3983  
Ctenosciara hyalipennis|CNFDL371-14|Canada|BOLD\_AAH3983  
Ctenosciara hyalipennis|SSFDC4259-14|Canada|BOLD\_AAH3983  
Ctenosciara hyalipennis|SSFDC4254-14|Canada|BOLD\_AAH3983  
Ctenosciara hyalipennis|SSFDC4127-14|Canada|BOLD\_AAH3983  
Ctenosciara hyalipennis|SSFDC4121-14|Canada|BOLD\_AAH3983  
Ctenosciara hyalipennis|SSFDC4018-14|Canada|BOLD\_AAH3983  
Ctenosciara hyalipennis|CNPEM1339-14|Canada|BOLD\_AAH3983  
Ctenosciara hyalipennis|CNPEL1381-14|Canada|BOLD\_AAH3983  
Ctenosciara hyalipennis|CNPEL089-14|Canada|BOLD\_AAH3983  
Ctenosciara hyalipennis|GMGRG3002-13|Germany|BOLD\_AAH3983  
Ctenosciara hyalipennis|GMGRG2308-13|Germany|BOLD\_AAH3983  
Ctenosciara hyalipennis|GMGRG1379-13|Germany|BOLD\_AAH3983  
Ctenosciara hyalipennis|CNPEB1233-14|Canada|BOLD\_AAH3983  
Ctenosciara hyalipennis|SSFDC4223-14|Canada|BOLD\_AAH3983  
Ctenosciara hyalipennis|SSFDC4506-14|Canada|BOLD\_AAH3983  
Ctenosciara hyalipennis|GMGRF467-13|Germany|BOLD\_AAH3983  
Ctenosciara hyalipennis|SSFDC4719-14|Canada|BOLD\_AAH3983  
Ctenosciara hyalipennis|SSFDC719-14|Canada|BOLD\_AAH3983  
Ctenosciara hyalipennis|CNPEM2791-14|Canada|BOLD\_AAH3983  
Ctenosciara hyalipennis|CNPEL1763-14|Canada|BOLD\_AAH3983  
Ctenosciara hyalipennis|CNPEL1610-14|Canada|BOLD\_AAH3983  
Ctenosciara hyalipennis|CNPEL637-14|Canada|BOLD\_AAH3983  
Ctenosciara hyalipennis|CNPEL317-14|Canada|BOLD\_AAH3983  
Ctenosciara hyalipennis|GMGR1591-13|Germany|BOLD\_AAH3983  
Ctenosciara hyalipennis|GMGRG4616-13|Germany|BOLD\_AAH3983  
Ctenosciara hyalipennis|SSFDB1286-14|Canada|BOLD\_AAH3983  
Ctenosciara hyalipennis|GMGRF1491-13|Germany|BOLD\_AAH3983  
Ctenosciara hyalipennis|SSFDC4705-14|Canada|BOLD\_AAH3983  
Ctenosciara hyalipennis|SSFDC2972-14|Canada|BOLD\_AAH3983  
Ctenosciara hyalipennis|CNKJK953-14|Canada|BOLD\_AAH3983  
Ctenosciara hyalipennis|CNKJF301-14|Canada|BOLD\_AAH3983  
Ctenosciara hyalipennis|CNPEL1839-14|Canada|BOLD\_AAH3983  
Ctenosciara hyalipennis|SSFDC4061-14|Canada|BOLD\_AAH3983  
Ctenosciara hyalipennis|SSFDC4027-14|Canada|BOLD\_AAH3983  
Ctenosciara hyalipennis|CNKJA005-14|Canada|BOLD\_AAH3983  
Ctenosciara hyalipennis|SSFDC4221-14|Canada|BOLD\_AAH3983  
Ctenosciara hyalipennis|GMGRG2264-13|Germany|BOLD\_AAH3983  
Ctenosciara hyalipennis|SSFDC4475-14|Canada|BOLD\_AAH3983  
Ctenosciara hyalipennis|SSFDC4284-14|Canada|BOLD\_AAH3983  
Ctenosciara hyalipennis|CNPEB1345-14|Canada|BOLD\_AAH3983  
Ctenosciara hyalipennis|SSFDC4535-14|Canada|BOLD\_AAH3983  
Ctenosciara hyalipennis|SSFDC3389-14|Canada|BOLD\_AAH3983  
Ctenosciara hyalipennis|SSFDC3196-14|Canada|BOLD\_AAH3983  
Ctenosciara hyalipennis|CNPEO183-14|Canada|BOLD\_AAH3983  
Ctenosciara hyalipennis|CNKJ055-14|Canada|BOLD\_AAH3983  
Ctenosciara hyalipennis|SSFDC4009-14|Canada|BOLD\_AAH3983  
Ctenosciara hyalipennis|SSFDC4456-14|Canada|BOLD\_AAH3983  
Ctenosciara hyalipennis|SSFDC4387-14|Canada|BOLD\_AAH3983  
Ctenosciara hyalipennis|CNPEB360-14|Canada|BOLD\_AAH3983  
Ctenosciara hyalipennis|SSFDC4426-14|Canada|BOLD\_AAH3983

Ctenosciara hyalipennis|SSFDC4387-14|Canada|BOLD\_AAH3983  
Ctenosciara hyalipennis|CNPEB360-14|Canada|BOLD\_AAH3983  
Ctenosciara hyalipennis|SSFDC4426-14|Canada|BOLD\_AAH3983  
Ctenosciara hyalipennis|CNPEL888-14|Canada|BOLD\_AAH3983  
Ctenosciara hyalipennis|SSFDC1617-14|Canada|BOLD\_AAH3983  
Ctenosciara hyalipennis|SSFDC570-14|Canada|BOLD\_AAH3983  
Ctenosciara hyalipennis|CNPEL976-14|Canada|BOLD\_AAH3983  
Ctenosciara hyalipennis|SSFDC4536-14|Canada|BOLD\_AAH3983  
Ctenosciara hyalipennis|SSFDC4528-14|Canada|BOLD\_AAH3983  
Ctenosciara hyalipennis|SSFDC4288-14|Canada|BOLD\_AAH3983  
Ctenosciara hyalipennis|SSFDC4445-14|Canada|BOLD\_AAH3983  
Ctenosciara hyalipennis|CNPEB561-14|Canada|BOLD\_AAH3983  
Ctenosciara hyalipennis|CNPEB350-14|Canada|BOLD\_AAH3983  
Ctenosciara hyalipennis|GMGRF4907-13|Germany|BOLD\_AAH3983  
Ctenosciara hyalipennis|CNPER130-14|Canada|BOLD\_AAH3983  
Ctenosciara hyalipennis|GMGRF4892-13|Germany|BOLD\_AAH3983  
Ctenosciara hyalipennis|CNPEL1753-14|Canada|BOLD\_AAH3983  
Ctenosciara hyalipennis|CNPEL103-14|Canada|BOLD\_AAH3983  
Ctenosciara hyalipennis|CNKJA266-14|Canada|BOLD\_AAH3983  
Ctenosciara hyalipennis|SSFDC4089-14|Canada|BOLD\_AAH3983  
Ctenosciara hyalipennis|CNPEH063-14|Canada|BOLD\_AAH3983  
Ctenosciara hyalipennis|CNPEB1379-14|Canada|BOLD\_AAH3983  
Ctenosciara hyalipennis|CNPEB547-14|Canada|BOLD\_AAH3983  
Ctenosciara hyalipennis|SSFDC4534-14|Canada|BOLD\_AAH3983  
Ctenosciara hyalipennis|GMGRF205-13|Germany|BOLD\_AAH3983  
Ctenosciara hyalipennis|GMGRF369-13|Germany|BOLD\_AAH3983  
Ctenosciara hyalipennis|CNKJA049-14|Canada|BOLD\_AAH3983  
Ctenosciara hyalipennis|SSFDC4575-14|Canada|BOLD\_AAH3983  
Ctenosciara hyalipennis|SSFDB3421-14|Canada|BOLD\_AAH3983  
Ctenosciara hyalipennis|SSFDC4233-14|Canada|BOLD\_AAH3983  
Ctenosciara hyalipennis|SSFDC4066-14|Canada|BOLD\_AAH3983  
Ctenosciara hyalipennis|GMGRF194-13|Germany|BOLD\_AAH3983  
Ctenosciara hyalipennis|SSFDC2490-14|Canada|BOLD\_AAH3983  
Ctenosciara hyalipennis|GMGRG2316-13|Germany|BOLD\_AAH3983  
Ctenosciara hyalipennis|GMGRG4589-13|Germany|BOLD\_AAH3983  
Ctenosciara hyalipennis|SSFDC4502-14|Canada|BOLD\_AAH3983  
Ctenosciara hyalipennis|SSFDC4188-14|Canada|BOLD\_AAH3983  
Ctenosciara hyalipennis|SSFDC2994-14|Canada|BOLD\_AAH3983  
Ctenosciara hyalipennis|GMGRF1257-13|Germany|BOLD\_AAH3983  
Ctenosciara hyalipennis|SSFDC2819-14|Canada|BOLD\_AAH3983  
Ctenosciara hyalipennis|CNPEN139-14|Canada|BOLD\_AAH3983  
Ctenosciara hyalipennis|SSFDC4484-14|Canada|BOLD\_AAH3983  
Ctenosciara hyalipennis|CNPER156-14|Canada|BOLD\_AAH3983  
Ctenosciara hyalipennis|CNFDL525-14|Canada|BOLD\_AAH3983  
Ctenosciara hyalipennis|CNKJL403-14|Canada|BOLD\_AAH3983  
Ctenosciara hyalipennis|CNPEB1445-14|Canada|BOLD\_AAH3983  
Ctenosciara hyalipennis|CNKJ058-14|Canada|BOLD\_AAH3983  
Ctenosciara hyalipennis|SSFDC2850-14|Canada|BOLD\_AAH3983  
Ctenosciara hyalipennis|CNPEB1515-14|Canada|BOLD\_AAH3983  
Ctenosciara hyalipennis|CNPEM3201-14|Canada|  
Ctenosciara hyalipennis|SSFDC1059-14|Canada|BOLD\_AAH3983  
Ctenosciara hyalipennis|SSFDC5255-14|Canada|BOLD\_AAH3983  
Ctenosciara hyalipennis|SSPEA216-15|Canada|BOLD\_AAH3983  
Ctenosciara hyalipennis|SSPEA280-15|Canada|BOLD\_AAH3983  
Ctenosciara hyalipennis|SSPEA1043-15|Canada|BOLD\_AAH3983  
Ctenosciara hyalipennis|SCINO531-15|Norway|BOLD\_AAH3983  
Ctenosciara hyalipennis|SSFDC4388-14|Canada|BOLD\_AAH3983  
Ctenosciara hyalipennis|SSFDC4390-14|Canada|BOLD\_AAH3983  
Ctenosciara hyalipennis|SSFDC4410-14|Canada|BOLD\_AAH3983  
Ctenosciara hyalipennis|SSFDC4446-14|Canada|BOLD\_AAH3983  
Ctenosciara hyalipennis|SSFDC3002-14|Canada|BOLD\_AAH3983  
Ctenosciara hyalipennis|SSFDC4279-14|Canada|BOLD\_AAH3983  
Ctenosciara hyalipennis|SSFDC4332-14|Canada|BOLD\_AAH3983  
Ctenosciara hyalipennis|SSFDC4377-14|Canada|BOLD\_AAH3983  
Ctenosciara hyalipennis|SSFDC4457-14|Canada|BOLD\_AAH3983  
Ctenosciara hyalipennis|SSFDC4480-14|Canada|BOLD\_AAH3983  
Ctenosciara hyalipennis|SSFDC4507-14|Canada|BOLD\_AAH3983  
Ctenosciara hyalipennis|SSFDC4567-14|Canada|BOLD\_AAH3983  
Ctenosciara hyalipennis|SSFDC5828-14|Canada|BOLD\_AAH3983  
Ctenosciara hyalipennis|SSPEA371-15|Canada|BOLD\_AAH3983  
Ctenosciara hyalipennis|SSFDC4635-14|Canada|BOLD\_AAH3983  
Ctenosciara hyalipennis|SSFDC4711-14|Canada|BOLD\_AAH3983  
Ctenosciara hyalipennis|SSPEA428-15|Canada|BOLD\_AAH3983  
Ctenosciara hyalipennis|CNTIE321-15|Canada|BOLD\_AAH3983  
Ctenosciara hyalipennis|GBMWN368-15|Germany|BOLD\_AAH3983  
Ctenosciara hyalipennis|GBMWN1479-15|Germany|BOLD\_AAH3983  
Ctenosciara hyalipennis|GBMWN1569-15|Germany|BOLD\_AAH3983  
Ctenosciara exigua|HRCTE002-15|Finland|  
Ctenosciara exigua|HRCTE003-15|Finland|  
Ctenosciara hyalipennis|HPPPA007-13|Canada|BOLD\_AAH3983  
Ctenosciara hyalipennis|HPPPA052-13|Canada|BOLD\_AAH3983  
Ctenosciara hyalipennis|GMGRA1238-13|Germany|BOLD\_AAH3983  
Ctenosciara hyalipennis|GMGRA451-13|Germany|BOLD\_AAH3983  
Ctenosciara hyalipennis|HPPPM273-13|Canada|BOLD\_AAH3983  
Ctenosciara hyalipennis|HPPPA353-13|Canada|BOLD\_AAH3983  
Ctenosciara hyalipennis|CNBRK273-14|Canada|BOLD\_AAH3983  
Ctenosciara hyalipennis|CNPEL1470-14|Canada|BOLD\_AAH3983  
Ctenosciara hyalipennis|CNPEL1533-14|Canada|BOLD\_AAH3983  
Ctenosciara hyalipennis|HPPPA091-13|Canada|BOLD\_AAH3983  
Ctenosciara hyalipennis|CNPEL1754-14|Canada|BOLD\_AAH3983  
Ctenosciara hyalipennis|HPPPF117-13|Canada|BOLD\_AAH3983  
Ctenosciara hyalipennis|HPPPF419-13|Canada|BOLD\_AAH3983  
Ctenosciara hyalipennis|HPPPF408-13|Canada|BOLD\_AAH3983  
Ctenosciara hyalipennis|CNBRQ261-14|Canada|BOLD\_AAH3983  
Ctenosciara hyalipennis|CNPEL1596-14|Canada|BOLD\_AAH3983  
Ctenosciara hyalipennis|CNPEL1624-14|Canada|BOLD\_AAH3983  
Ctenosciara hyalipennis|CNBRQ300-14|Canada|BOLD\_AAH3983  
Ctenosciara hyalipennis|CNBRQ569-14|Canada|BOLD\_AAH3983  
Ctenosciara hyalipennis|GMGRF2120-13|Germany|BOLD\_AAH3983  
Ctenosciara hyalipennis|SSBRA343-14|Canada|BOLD\_AAH3983
