# Supplementary material for: Ctenosciara alexanderkoenigi sp. n. (Diptera: Sciaridae), an exotic invader in Germany?
Source: Biodivers Data J. 2016 Apr 1;(4):e6460. doi: 10.3897/BDJ.4.e6460 (PMC4822059; doi:10.3897/BDJ.4.e6460)
Supplement: Supplementary material 3 — K2P pairwise distances BIN AAH3983 [file biodiversity_data_journal-4-e6460-s003.xlsx]

## Sheet: Tabelle1
K2P pairwise distances of BIN BOLD:AAH3983
BIN BOLD:AAH3983	process-ID	region	1	2	3	4	5	6	7	8	9	10	11	12	13	14	15	16	17	18	19	20	21	22	23	24	25	26	27	28	29	30	31	32	33	34	35	36	37	38	39	40	41	42	43	44	45	46	47
[ 1] #BBDED381-10|HM412738|09BBEDI-1363|Ctenosciara_hyalipennis|COI-5P	BBDED381-10	ENEA
[ 2] #BBDED382-10|HM412739|09BBEDI-1364|Ctenosciara_hyalipennis|COI-5P	BBDED382-10	ENEA	0
[ 3] #BBDEE274-10|HQ551703|09BBEDI-2237|Ctenosciara_hyalipennis|COI-5P	BBDEE274-10	ENEA	0	0
[ 4] #CNBRA001-14|KR239178|BIOUG09813-B03|Ctenosciara_hyalipennis|COI-5P	CNBRA001-14	ENEA	0.0017	0.0017	0.0017
[ 5] #CNBRA002-14|KR236019|BIOUG09813-B04|Ctenosciara_hyalipennis|COI-5P	CNBRA002-14	ENEA	0.0018	0.0018	0.0018	0
[ 6] #CNBRA004-14|KR251817|BIOUG09813-B06|Ctenosciara_hyalipennis|COI-5P	CNBRA004-14	ENEA	0.0017	0.0017	0.0017	0	0
[ 7] #CNBRA009-14|KR242313|BIOUG09813-B11|Ctenosciara_hyalipennis|COI-5P	CNBRA009-14	ENEA	0.0017	0.0017	0.0017	0	0	0
[ 8] #CNBRA022-14|KR242918|BIOUG09813-C12|Ctenosciara_hyalipennis|COI-5P	CNBRA022-14	ENEA	0.0189	0.0189	0.0189	0.0175	0.0179	0.0172	0.0176
[ 9] #CNBRA023-14|KR247891|BIOUG09813-D01|Ctenosciara_hyalipennis|COI-5P	CNBRA023-14	ENEA	0.0017	0.0017	0.0017	0	0	0	0	0.0172
[ 10] #CNBRA033-14|KR239854|BIOUG09813-D11|Ctenosciara_hyalipennis|COI-5P	CNBRA033-14	ENEA	0.0017	0.0017	0.0017	0	0	0	0	0.0172	0
[ 11] #CNBRA038-14|KR236023|BIOUG09813-E04|Ctenosciara_hyalipennis|COI-5P	CNBRA038-14	ENEA	0.0017	0.0017	0.0017	0	0	0	0	0.0175	0	0
[ 12] #CNBRA039-14|KR250774|BIOUG09813-E05|Ctenosciara_hyalipennis|COI-5P	CNBRA039-14	ENEA	0.0193	0.0193	0.0193	0.0178	0.0184	0.0175	0.018	0	0.0175	0.0175	0.0178
[ 13] #CNBRA041-14|KR234957|BIOUG09813-E07|Ctenosciara_hyalipennis|COI-5P	CNBRA041-14	ENEA	0.0018	0.0018	0.0018	0	0	0	0	0.0186	0	0	0	0.0186
[ 14] #CNBRA043-14|KR242480|BIOUG09813-E09|Ctenosciara_hyalipennis|COI-5P	CNBRA043-14	ENEA	0.0017	0.0017	0.0017	0	0	0	0	0.0175	0	0	0	0.0178	0
[ 15] #CNBRA046-14|KR240223|BIOUG09813-E12|Ctenosciara_hyalipennis|COI-5P	CNBRA046-14	ENEA	0.0018	0.0018	0.0018	0	0	0	0	0.0179	0	0	0	0.0179	0	0
[ 16] #CNBRA050-14|KR250356|BIOUG09813-F04|Ctenosciara_hyalipennis|COI-5P	CNBRA050-14	ENEA	0.0017	0.0017	0.0017	0	0	0	0	0.0172	0	0	0	0.0175	0	0	0
[ 17] #CNBRA053-14|KR246139|BIOUG09813-F07|Ctenosciara_hyalipennis|COI-5P	CNBRA053-14	ENEA	0.0018	0.0018	0.0018	0	0	0	0	0.0179	0	0	0	0.0179	0	0	0	0
[ 18] #CNBRA055-14|KR237229|BIOUG09813-F09|Ctenosciara_hyalipennis|COI-5P	CNBRA055-14	ENEA	0.0018	0.0018	0.0018	0	0	0	0	0.0182	0	0	0	0.0185	0	0	0	0	0
[ 19] #CNBRA058-14|KR252553|BIOUG09813-F12|Ctenosciara_hyalipennis|COI-5P	CNBRA058-14	ENEA	0.0017	0.0017	0.0017	0	0	0	0	0.0172	0	0	0	0.0175	0	0	0	0	0	0
[ 20] #CNBRA060-14|KR255985|BIOUG09813-G02|Ctenosciara_hyalipennis|COI-5P	CNBRA060-14	ENEA	0.0017	0.0017	0.0017	0	0	0	0	0.0176	0	0	0	0.0176	0	0	0	0	0	0	0
[ 21] #CNBRA065-14|KR243550|BIOUG09813-G07|Ctenosciara_hyalipennis|COI-5P	CNBRA065-14	ENEA	0.0017	0.0017	0.0017	0	0	0	0	0.0175	0	0	0	0.0178	0	0	0	0	0	0	0	0
[ 22] #CNBRA069-14|KR245336|BIOUG09813-G11|Ctenosciara_hyalipennis|COI-5P	CNBRA069-14	ENEA	0.0017	0.0017	0.0017	0	0	0	0	0.0175	0	0	0	0.0178	0	0	0	0	0	0	0	0	0
[ 23] #CNBRA072-14|KR234969|BIOUG09813-H02|Ctenosciara_hyalipennis|COI-5P	CNBRA072-14	ENEA	0.0193	0.0193	0.0193	0.0175	0.018	0.0175	0.0176	0	0.0175	0.0175	0.0175	0	0.0186	0.0175	0.0179	0.0175	0.0179	0.0182	0.0175	0.0179	0.0175	0.0175
[ 24] #CNBRA074-14|KR248045|BIOUG09813-H04|Ctenosciara_hyalipennis|COI-5P	CNBRA074-14	ENEA	0.0017	0.0017	0.0017	0	0	0	0	0.0172	0	0	0	0.0175	0	0	0	0	0	0	0	0	0	0	0.0175
[ 25] #CNBRA076-14|KR245786|BIOUG09813-H06|Ctenosciara_hyalipennis|COI-5P	CNBRA076-14	ENEA	0.0017	0.0017	0.0017	0	0	0	0	0.0172	0	0	0	0.0175	0	0	0	0	0	0	0	0	0	0	0.0175	0
[ 26] #CNBRA080-14|KR257982|BIOUG09813-H10|Ctenosciara_hyalipennis|COI-5P	CNBRA080-14	ENEA	0.0017	0.0017	0.0017	0	0	0	0	0.0172	0	0	0	0.0175	0	0	0	0	0	0	0	0	0	0	0.0175	0	0
[ 27] #CNBRA104-14|KR248692|BIOUG09889-A07|Ctenosciara_hyalipennis|COI-5P	CNBRA104-14	ENEA	0.0017	0.0017	0.0017	0	0	0	0	0.0172	0	0	0	0.0175	0	0	0	0	0	0	0	0	0	0	0.0175	0	0	0
[ 28] #CNBRA109-14|KR251058|BIOUG09889-A12|Ctenosciara_hyalipennis|COI-5P	CNBRA109-14	ENEA	0.0017	0.0017	0.0017	0	0	0	0	0.0175	0	0	0	0.0178	0	0	0	0	0	0	0	0	0	0	0.0175	0	0	0	0
[ 29] #CNBRA112-14|KR246620|BIOUG09889-B03|Ctenosciara_hyalipennis|COI-5P	CNBRA112-14	ENEA	0.0018	0.0018	0.0018	0	0	0	0	0.0184	0	0	0	0.0184	0	0	0	0	0	0	0	0	0	0	0.0184	0	0	0	0	0
[ 30] #CNBRA113-14|KR252632|BIOUG09889-B04|Ctenosciara_hyalipennis|COI-5P	CNBRA113-14	ENEA	0.0017	0.0017	0.0017	0	0	0	0	0.0172	0	0	0	0.0175	0	0	0	0	0	0	0	0	0	0	0.0175	0	0	0	0	0	0
[ 31] #CNBRA117-14|KR242115|BIOUG09889-B08|Ctenosciara_hyalipennis|COI-5P	CNBRA117-14	ENEA	0.0202	0.0202	0.0202	0.0184	0.0184	0.0184	0.0184	0	0.0184	0.0184	0.0184	0	0.0186	0.0184	0.0184	0.0184	0.0184	0.0185	0.0184	0.0184	0.0184	0.0184	0	0.0184	0.0184	0.0184	0.0184	0.0184	0.0184	0.0184
[ 32] #CNBRA118-14|KR247608|BIOUG09889-B09|Ctenosciara_hyalipennis|COI-5P	CNBRA118-14	ENEA	0.0017	0.0017	0.0017	0	0	0	0	0.0172	0	0	0	0.0175	0	0	0	0	0	0	0	0	0	0	0.0175	0	0	0	0	0	0	0	0.0184
[ 33] #CNBRA119-14|KR239806|BIOUG09889-B10|Ctenosciara_hyalipennis|COI-5P	CNBRA119-14	ENEA	0.0018	0.0018	0.0018	0	0	0	0	0.0182	0	0	0	0.0185	0	0	0	0	0	0	0	0	0	0	0.0182	0	0	0	0	0	0	0	0.0185	0
[ 34] #CNBRA126-14|KR252118|BIOUG09889-C05|Ctenosciara_hyalipennis|COI-5P	CNBRA126-14	ENEA	0.0017	0.0017	0.0017	0	0	0	0	0.0172	0	0	0	0.0175	0	0	0	0	0	0	0	0	0	0	0.0175	0	0	0	0	0	0	0	0.0184	0	0
[ 35] #CNBRA129-14|KR244493|BIOUG09889-C08|Ctenosciara_hyalipennis|COI-5P	CNBRA129-14	ENEA	0.0017	0.0017	0.0017	0	0	0	0	0.0172	0	0	0	0.0175	0	0	0	0	0	0	0	0	0	0	0.0175	0	0	0	0	0	0	0	0.0184	0	0	0
[ 36] #CNBRA130-14|KR252989|BIOUG09889-C09|Ctenosciara_hyalipennis|COI-5P	CNBRA130-14	ENEA	0.0017	0.0017	0.0017	0	0	0	0	0.0175	0	0	0	0.0175	0	0	0	0	0	0	0	0	0	0	0.0178	0	0	0	0	0	0	0	0.0184	0	0	0	0
[ 37] #CNBRA133-14|KR245551|BIOUG09889-C12|Ctenosciara_hyalipennis|COI-5P	CNBRA133-14	ENEA	0.0017	0.0017	0.0017	0	0	0	0	0.0175	0	0	0	0.0175	0	0	0	0	0	0	0	0	0	0	0.0178	0	0	0	0	0	0	0	0.0184	0	0	0	0	0
[ 38] #CNBRA137-14|KR237996|BIOUG09889-D04|Ctenosciara_hyalipennis|COI-5P	CNBRA137-14	ENEA	0.0017	0.0017	0.0017	0	0	0	0	0.0176	0	0	0	0.018	0	0	0	0	0	0	0	0	0	0	0.0176	0	0	0	0	0	0	0	0.0184	0	0	0	0	0	0
[ 39] #CNBRA140-14|KR237557|BIOUG09889-D07|Ctenosciara_hyalipennis|COI-5P	CNBRA140-14	ENEA	0.0017	0.0017	0.0017	0	0	0	0	0.0175	0	0	0	0.0178	0	0	0	0	0	0	0	0	0	0	0.0175	0	0	0	0	0	0	0	0.0184	0	0	0	0	0	0	0
[ 40] #CNBRA141-14|KR249506|BIOUG09889-D08|Ctenosciara_hyalipennis|COI-5P	CNBRA141-14	ENEA	0.0195	0.0195	0.0195	0.018	0.0185	0.0177	0.0181	0	0.0177	0.0177	0.018	0	0.0187	0.018	0.018	0.0177	0.018	0.0187	0.0177	0.0177	0.018	0.018	0	0.0177	0.0177	0.0177	0.0177	0.018	0.0185	0.0177	0	0.0177	0.0187	0.0177	0.0177	0.0177	0.0177	0.0181	0.018
[ 41] #CNBRA144-14|KR252417|BIOUG09889-D11|Ctenosciara_hyalipennis|COI-5P	CNBRA144-14	ENEA	0.0018	0.0018	0.0018	0	0	0	0	0.0182	0	0	0	0.0185	0	0	0	0	0	0	0	0	0	0	0.0182	0	0	0	0	0	0	0	0.0185	0	0	0	0	0	0	0	0	0.0187
[ 42] #CNBRA150-14|KR255653|BIOUG09889-E05|Ctenosciara_hyalipennis|COI-5P	CNBRA150-14	ENEA	0.0017	0.0017	0.0017	0	0	0	0	0.0177	0	0	0	0.018	0	0	0	0	0	0	0	0	0	0	0.0177	0	0	0	0	0	0	0	0.0184	0	0	0	0	0	0	0	0	0.0182	0
[ 43] #CNBRA151-14|KR255668|BIOUG09889-E06|Ctenosciara_hyalipennis|COI-5P	CNBRA151-14	ENEA	0.0018	0.0018	0.0018	0	0	0	0	0.018	0	0	0	0.018	0	0	0	0	0	0	0	0	0	0	0.018	0	0	0	0	0	0	0	0.0185	0	0	0	0	0	0	0	0	0.018	0	0
[ 44] #CNBRA152-14|KR234618|BIOUG09889-E07|Ctenosciara_hyalipennis|COI-5P	CNBRA152-14	ENEA	0.0018	0.0018	0.0018	0	0	0	0	0.0179	0	0	0	0.0184	0	0	0	0	0	0	0	0	0	0	0.018	0	0	0	0	0	0	0	0.0184	0	0	0	0	0	0	0	0	0.0185	0	0	0
[ 45] #CNBRA156-14|KR236101|BIOUG09889-E11|Ctenosciara_hyalipennis|COI-5P	CNBRA156-14	ENEA	0.0018	0.0018	0.0018	0	0	0	0	0.0182	0	0	0	0.0185	0	0	0	0	0	0	0	0	0	0	0.0182	0	0	0	0	0	0	0	0.0185	0	0	0	0	0	0	0	0	0.0187	0	0	0	0
[ 46] #CNBRA157-14|KR242505|BIOUG09889-E12|Ctenosciara_hyalipennis|COI-5P	CNBRA157-14	ENEA	0.0017	0.0017	0.0017	0	0	0	0	0.0172	0	0	0	0.0175	0	0	0	0	0	0	0	0	0	0	0.0175	0	0	0	0	0	0	0	0.0184	0	0	0	0	0	0	0	0	0.0177	0	0	0	0	0
[ 47] #CNBRA158-14|KR235279|BIOUG09889-F01|Ctenosciara_hyalipennis|COI-5P	CNBRA158-14	ENEA	0.0017	0.0017	0.0017	0	0	0	0	0.0175	0	0	0	0.0178	0	0	0	0	0	0	0	0	0	0	0.0175	0	0	0	0	0	0	0	0.0184	0	0	0	0	0	0	0	0	0.018	0	0	0	0	0	0
[ 48] #CNBRA160-14|KR254077|BIOUG09889-F03|Ctenosciara_hyalipennis|COI-5P	CNBRA160-14	ENEA	0.0018	0.0018	0.0018	0	0	0	0	0.0172	0	0	0	0.0176	0	0	0	0	0	0	0	0	0	0	0.0173	0	0	0	0	0	0	0	0.0176	0	0	0	0	0	0	0	0	0.0178	0	0	0	0	0	0	0
[ 49] #CNBRA161-14|KR240040|BIOUG09889-F04|Ctenosciara_hyalipennis|COI-5P	CNBRA161-14	ENEA	0.0017	0.0017	0.0017	0	0	0	0	0.0175	0	0	0	0.0175	0	0	0	0	0	0	0	0	0	0	0.0178	0	0	0	0	0	0	0	0.0184	0	0	0	0	0	0	0	0	0.0177	0	0	0	0	0	0	0
[ 50] #CNBRA163-14|KR236901|BIOUG09889-F06|Ctenosciara_hyalipennis|COI-5P	CNBRA163-14	ENEA	0.0018	0.0018	0.0018	0	0	0	0	0.0178	0	0	0	0.0178	0	0	0	0	0	0	0	0	0	0	0.0178	0	0	0	0	0	0	0	0.0184	0	0	0	0	0	0	0	0	0.018	0	0	0	0	0	0	0
[ 51] #CNBRA164-14|KR238045|BIOUG09889-F07|Ctenosciara_hyalipennis|COI-5P	CNBRA164-14	ENEA	0.0018	0.0018	0.0018	0	0	0	0	0.0178	0	0	0	0.0178	0	0	0	0	0	0	0	0	0	0	0.0178	0	0	0	0	0	0	0	0.0184	0	0	0	0	0	0	0	0	0.018	0	0	0	0	0	0	0
[ 52] #CNBRA166-14|KR235314|BIOUG09889-F09|Ctenosciara_hyalipennis|COI-5P	CNBRA166-14	ENEA	0.0017	0.0017	0.0017	0	0	0	0	0.0172	0	0	0	0.0175	0	0	0	0	0	0	0	0	0	0	0.0175	0	0	0	0	0	0	0	0.0184	0	0	0	0	0	0	0	0	0.0177	0	0	0	0	0	0	0
[ 53] #CNBRA168-14|KR256611|BIOUG09889-F11|Ctenosciara_hyalipennis|COI-5P	CNBRA168-14	ENEA	0.0017	0.0017	0.0017	0	0	0	0	0.0175	0	0	0	0.0178	0	0	0	0	0	0	0	0	0	0	0.0175	0	0	0	0	0	0	0	0.0184	0	0	0	0	0	0	0	0	0.018	0	0	0	0	0	0	0
[ 54] #CNBRA172-14|KR251556|BIOUG09889-G03|Ctenosciara_hyalipennis|COI-5P	CNBRA172-14	ENEA	0.0017	0.0017	0.0017	0	0	0	0	0.0173	0	0	0	0.0176	0	0	0	0	0	0	0	0	0	0	0.0175	0	0	0	0	0	0	0	0.0184	0	0	0	0	0	0	0	0	0.0177	0	0	0	0	0	0	0
[ 55] #CNBRA173-14|KR256899|BIOUG09889-G04|Ctenosciara_hyalipennis|COI-5P	CNBRA173-14	ENEA	0.0017	0.0017	0.0017	0	0	0	0	0.0176	0	0	0	0.0179	0	0	0	0	0	0	0	0	0	0	0.0176	0	0	0	0	0	0	0	0.0184	0	0	0	0	0	0	0	0	0.0181	0	0	0	0	0	0	0
[ 56] #CNBRB104-14|KR252576|BIOUG09891-A01|Ctenosciara_hyalipennis|COI-5P	CNBRB104-14	ENEA	0.0018	0.0018	0.0018	0	0	0	0	0.0183	0	0	0	0.0183	0	0	0	0	0	0	0	0	0	0	0.0183	0	0	0	0	0	0	0	0.0185	0	0	0	0	0	0	0	0	0.0184	0	0	0	0	0	0	0
[ 57] #CNBRB108-14|KR253681|BIOUG09891-A05|Ctenosciara_hyalipennis|COI-5P	CNBRB108-14	ENEA	0.0017	0.0017	0.0017	0	0	0	0	0.0172	0	0	0	0.0175	0	0	0	0	0	0	0	0	0	0	0.0175	0	0	0	0	0	0	0	0.0184	0	0	0	0	0	0	0	0	0.0177	0	0	0	0	0	0	0
[ 58] #CNBRB110-14|KR249987|BIOUG09891-A07|Ctenosciara_hyalipennis|COI-5P	CNBRB110-14	ENEA	0.0017	0.0017	0.0017	0	0	0	0	0.0175	0	0	0	0.0178	0	0	0	0	0	0	0	0	0	0	0.0175	0	0	0	0	0	0	0	0.0184	0	0	0	0	0	0	0	0	0.018	0	0	0	0	0	0	0
[ 59] #CNBRB114-14|KR246465|BIOUG09891-A11|Ctenosciara_hyalipennis|COI-5P	CNBRB114-14	ENEA	0.0018	0.0018	0.0018	0	0	0	0	0.0184	0	0	0	0.0184	0	0	0	0	0	0	0	0	0	0	0.0184	0	0	0	0	0	0	0	0.0184	0	0	0	0	0	0	0	0	0.0185	0	0	0	0	0	0	0
[ 60] #CNBRB116-14|KR255024|BIOUG09891-B01|Ctenosciara_hyalipennis|COI-5P	CNBRB116-14	ENEA	0.0017	0.0017	0.0017	0	0	0	0	0.0175	0	0	0	0.0175	0	0	0	0	0	0	0	0	0	0	0.0177	0	0	0	0	0	0	0	0.0184	0	0	0	0	0	0	0	0	0.0177	0	0	0	0	0	0	0
[ 61] #CNBRB117-14|KR257956|BIOUG09891-B02|Ctenosciara_hyalipennis|COI-5P	CNBRB117-14	ENEA	0.0017	0.0017	0.0017	0	0	0	0	0.0177	0	0	0	0.0177	0	0	0	0	0	0	0	0	0	0	0.0179	0	0	0	0	0	0	0	0.0185	0	0	0	0	0	0	0	0	0.0177	0	0	0	0	0	0	0
[ 62] #CNBRB119-14|KR244143|BIOUG09891-B04|Ctenosciara_hyalipennis|COI-5P	CNBRB119-14	ENEA	0.0018	0.0018	0.0018	0	0	0	0	0.0187	0	0	0	0.0187	0	0	0	0	0	0	0	0	0	0	0.0187	0	0	0	0	0	0	0	0.0192	0	0	0	0	0	0	0	0	0.0187	0	0	0	0	0	0	0
[ 63] #CNBRB121-14|KR237854|BIOUG09891-B06|Ctenosciara_hyalipennis|COI-5P	CNBRB121-14	ENEA	0.0018	0.0018	0.0018	0	0	0	0	0.0179	0	0	0	0.0179	0	0	0	0	0	0	0	0	0	0	0.0179	0	0	0	0	0	0	0	0.0184	0	0	0	0	0	0	0	0	0.018	0	0	0	0	0	0	0
[ 64] #CNBRB122-14|KR243891|BIOUG09891-B07|Ctenosciara_hyalipennis|COI-5P	CNBRB122-14	ENEA	0.0017	0.0017	0.0017	0	0	0	0	0.0175	0	0	0	0.0178	0	0	0	0	0	0	0	0	0	0	0.0175	0	0	0	0	0	0	0	0.0184	0	0	0	0	0	0	0	0	0.018	0	0	0	0	0	0	0
[ 65] #CNBRB127-14|KR256843|BIOUG09891-B12|Ctenosciara_hyalipennis|COI-5P	CNBRB127-14	ENEA	0.0017	0.0017	0.0017	0	0	0	0	0.0175	0	0	0	0.0175	0	0	0	0	0	0	0	0	0	0	0.0178	0	0	0	0	0	0	0	0.0184	0	0	0	0	0	0	0	0	0.0177	0	0	0	0	0	0	0
[ 66] #CNBRB129-14|KR240068|BIOUG09891-C02|Ctenosciara_hyalipennis|COI-5P	CNBRB129-14	ENEA	0.0018	0.0018	0.0018	0	0	0	0	0.018	0	0	0	0.018	0	0	0	0	0	0	0	0	0	0	0.018	0	0	0	0	0	0	0	0.0185	0	0	0	0	0	0	0	0	0.018	0	0	0	0	0	0	0
[ 67] #CNBRB133-14|KR242676|BIOUG09891-C06|Ctenosciara_hyalipennis|COI-5P	CNBRB133-14	ENEA	0.0018	0.0018	0.0018	0	0	0	0	0.0182	0	0	0	0.0185	0	0	0	0	0	0	0	0	0	0	0.0182	0	0	0	0	0	0	0	0.0185	0	0	0	0	0	0	0	0	0.0187	0	0	0	0	0	0	0
[ 68] #CNBRB134-14|KR251237|BIOUG09891-C07|Ctenosciara_hyalipennis|COI-5P	CNBRB134-14	ENEA	0.0018	0.0018	0.0018	0	0	0	0	0.0182	0	0	0	0.0185	0	0	0	0	0	0	0	0	0	0	0.0182	0	0	0	0	0	0	0	0.0185	0	0	0	0	0	0	0	0	0.0187	0	0	0	0	0	0	0
[ 69] #CNBRB138-14|KR255235|BIOUG09891-C11|Ctenosciara_hyalipennis|COI-5P	CNBRB138-14	ENEA	0.0017	0.0017	0.0017	0	0	0	0	0.0175	0	0	0	0.0179	0	0	0	0	0	0	0	0	0	0	0.0175	0	0	0	0	0	0	0	0.0184	0	0	0	0	0	0	0	0	0.018	0	0	0	0	0	0	0
[ 70] #CNBRB141-14|KR250385|BIOUG09891-D02|Ctenosciara_hyalipennis|COI-5P	CNBRB141-14	ENEA	0.0017	0.0017	0.0017	0	0	0	0	0.0175	0	0	0	0.0175	0	0	0	0	0	0	0	0	0	0	0.0178	0	0	0	0	0	0	0	0.0184	0	0	0	0	0	0	0	0	0.0177	0	0	0	0	0	0	0
[ 71] #CNBRB142-14|KR249837|BIOUG09891-D03|Ctenosciara_hyalipennis|COI-5P	CNBRB142-14	ENEA	0.0017	0.0017	0.0017	0	0	0	0	0.0172	0	0	0	0.0175	0	0	0	0	0	0	0	0	0	0	0.0175	0	0	0	0	0	0	0	0.0184	0	0	0	0	0	0	0	0	0.0177	0	0	0	0	0	0	0
[ 72] #CNBRB143-14|KR239036|BIOUG09891-D04|Ctenosciara_hyalipennis|COI-5P	CNBRB143-14	ENEA	0.0019	0.0019	0.0019	0	0	0	0	0.017	0	0	0	0.017	0	0	0	0	0	0	0	0	0	0	0.017	0	0	0	0	0	0	0	0.0174	0	0	0	0	0	0	0	0	0.017	0	0	0	0	0	0	0
[ 73] #CNBRB144-14|KR248247|BIOUG09891-D05|Ctenosciara_hyalipennis|COI-5P	CNBRB144-14	ENEA	0.0017	0.0017	0.0017	0	0	0	0	0.0175	0	0	0	0.0178	0	0	0	0	0	0	0	0	0	0	0.0175	0	0	0	0	0	0	0	0.0184	0	0	0	0	0	0	0	0	0.018	0	0	0	0	0	0	0
[ 74] #CNBRB146-14|KR245212|BIOUG09891-D07|Ctenosciara_hyalipennis|COI-5P	CNBRB146-14	ENEA	0.0018	0.0018	0.0018	0	0	0	0	0.0182	0	0	0	0.0185	0	0	0	0	0	0	0	0	0	0	0.0182	0	0	0	0	0	0	0	0.0185	0	0	0	0	0	0	0	0	0.0187	0	0	0	0	0	0	0
[ 75] #CNBRB152-14|KR257839|BIOUG09891-E01|Ctenosciara_hyalipennis|COI-5P	CNBRB152-14	ENEA	0.0017	0.0017	0.0017	0	0	0	0	0.0175	0	0	0	0.0178	0	0	0	0	0	0	0	0	0	0	0.0175	0	0	0	0	0	0	0	0.0184	0	0	0	0	0	0	0	0	0.018	0	0	0	0	0	0	0
[ 76] #CNBRB153-14|KR235974|BIOUG09891-E02|Ctenosciara_hyalipennis|COI-5P	CNBRB153-14	ENEA	0.0017	0.0017	0.0017	0	0	0	0	0.0175	0	0	0	0.0178	0	0	0	0	0	0	0	0	0	0	0.0175	0	0	0	0	0	0	0	0.0184	0	0	0	0	0	0	0	0	0.018	0	0	0	0	0	0	0
[ 77] #CNBRB156-14|KR242646|BIOUG09891-E05|Ctenosciara_hyalipennis|COI-5P	CNBRB156-14	ENEA	0.0018	0.0018	0.0018	0	0	0	0	0.0187	0	0	0	0.0187	0	0	0	0	0	0	0	0	0	0	0.0187	0	0	0	0	0	0	0	0.0187	0	0	0	0	0	0	0	0	0.0187	0	0	0	0	0	0	0
[ 78] #CNBRB158-14|KR256308|BIOUG09891-E07|Ctenosciara_hyalipennis|COI-5P	CNBRB158-14	ENEA	0.0018	0.0018	0.0018	0	0	0	0	0.018	0	0	0	0.0184	0	0	0	0	0	0	0	0	0	0	0.018	0	0	0	0	0	0	0	0.0184	0	0	0	0	0	0	0	0	0.0185	0	0	0	0	0	0	0
[ 79] #CNBRB159-14|KR250661|BIOUG09891-E08|Ctenosciara_hyalipennis|COI-5P	CNBRB159-14	ENEA	0.0018	0.0018	0.0018	0	0	0	0	0.0181	0	0	0	0.0181	0	0	0	0	0	0	0	0	0	0	0.0181	0	0	0	0	0	0	0	0.0185	0	0	0	0	0	0	0	0	0.0181	0	0	0	0	0	0	0
[ 80] #CNBRB162-14|KR258139|BIOUG09891-E11|Ctenosciara_hyalipennis|COI-5P	CNBRB162-14	ENEA	0.0018	0.0018	0.0018	0	0	0	0	0.0182	0	0	0	0.0185	0	0	0	0	0	0	0	0	0	0	0.0182	0	0	0	0	0	0	0	0.0185	0	0	0	0	0	0	0	0	0.0187	0	0	0	0	0	0	0
[ 81] #CNBRB165-14|KR251977|BIOUG09891-F02|Ctenosciara_hyalipennis|COI-5P	CNBRB165-14	ENEA	0.0199	0.0199	0.0199	0.018	0.0185	0.018	0.0181	0	0.018	0.018	0.018	0	0.0186	0.018	0.018	0.018	0.018	0.0186	0.018	0.018	0.018	0.018	0	0.018	0.018	0.018	0.018	0.018	0.0185	0.018	0	0.018	0.0187	0.018	0.018	0.018	0.018	0.0181	0.018	0	0.0186	0.0181	0.0181	0.0185	0.0186	0.018	0.018
[ 82] #CNBRB166-14|KR236232|BIOUG09891-F03|Ctenosciara_hyalipennis|COI-5P	CNBRB166-14	ENEA	0.0017	0.0017	0.0017	0	0	0	0	0.0175	0	0	0	0.0175	0	0	0	0	0	0	0	0	0	0	0.0178	0	0	0	0	0	0	0	0.0184	0	0	0	0	0	0	0	0	0.0177	0	0	0	0	0	0	0
[ 83] #CNBRB169-14|KR251231|BIOUG09891-F06|Ctenosciara_hyalipennis|COI-5P	CNBRB169-14	ENEA	0.0018	0.0018	0.0018	0	0	0	0	0.018	0	0	0	0.018	0	0	0	0	0	0	0	0	0	0	0.018	0	0	0	0	0	0	0	0.0184	0	0	0	0	0	0	0	0	0.0181	0	0	0	0	0	0	0
[ 84] #CNBRB172-14|KR238954|BIOUG09891-F09|Ctenosciara_hyalipennis|COI-5P	CNBRB172-14	ENEA	0.0018	0.0018	0.0018	0	0	0	0	0.0178	0	0	0	0.0178	0	0	0	0	0	0	0	0	0	0	0.0178	0	0	0	0	0	0	0	0.0184	0	0	0	0	0	0	0	0	0.018	0	0	0	0	0	0	0
[ 85] #CNBRB174-14|KR245442|BIOUG09891-F11|Ctenosciara_hyalipennis|COI-5P	CNBRB174-14	ENEA	0.0017	0.0017	0.0017	0	0	0	0	0.0175	0	0	0	0.018	0	0	0	0	0	0	0	0	0	0	0.0176	0	0	0	0	0	0	0	0.0184	0	0	0	0	0	0	0	0	0.0181	0	0	0	0	0	0	0
[ 86] #CNBRB175-14|KR252570|BIOUG09891-F12|Ctenosciara_hyalipennis|COI-5P	CNBRB175-14	ENEA	0.0017	0.0017	0.0017	0	0	0	0	0.0175	0	0	0	0.0178	0	0	0	0	0	0	0	0	0	0	0.0175	0	0	0	0	0	0	0	0.0184	0	0	0	0	0	0	0	0	0.018	0	0	0	0	0	0	0
[ 87] #CNBRB176-14|KR248127|BIOUG09891-G01|Ctenosciara_hyalipennis|COI-5P	CNBRB176-14	ENEA	0.0017	0.0017	0.0017	0	0	0	0	0.0175	0	0	0	0.0178	0	0	0	0	0	0	0	0	0	0	0.0175	0	0	0	0	0	0	0	0.0184	0	0	0	0	0	0	0	0	0.018	0	0	0	0	0	0	0
[ 88] #CNBRB179-14|KR240119|BIOUG09891-G04|Ctenosciara_hyalipennis|COI-5P	CNBRB179-14	ENEA	0.0018	0.0018	0.0018	0	0	0	0	0.0178	0	0	0	0.0178	0	0	0	0	0	0	0	0	0	0	0.0178	0	0	0	0	0	0	0	0.0184	0	0	0	0	0	0	0	0	0.018	0	0	0	0	0	0	0
[ 89] #CNBRB181-14|KR253971|BIOUG09891-G06|Ctenosciara_hyalipennis|COI-5P	CNBRB181-14	ENEA	0.0018	0.0018	0.0018	0	0	0	0	0.0179	0	0	0	0.0179	0	0	0	0	0	0	0	0	0	0	0.0179	0	0	0	0	0	0	0	0.0184	0	0	0	0	0	0	0	0	0.0181	0	0	0	0	0	0	0
[ 90] #CNBRB182-14|KR237371|BIOUG09891-G07|Ctenosciara_hyalipennis|COI-5P	CNBRB182-14	ENEA	0.0017	0.0017	0.0017	0	0	0	0	0.0172	0	0	0	0.0175	0	0	0	0	0	0	0	0	0	0	0.0175	0	0	0	0	0	0	0	0.0184	0	0	0	0	0	0	0	0	0.0177	0	0	0	0	0	0	0
[ 91] #CNBRB183-14|KR245651|BIOUG09891-G08|Ctenosciara_hyalipennis|COI-5P	CNBRB183-14	ENEA	0.0018	0.0018	0.0018	0	0	0	0	0.0184	0	0	0	0.0187	0	0	0	0	0	0	0	0	0	0	0.0184	0	0	0	0	0	0	0	0.0187	0	0	0	0	0	0	0	0	0.0189	0	0	0	0	0	0	0
[ 92] #CNBRB184-14|KR236526|BIOUG09891-G09|Ctenosciara_hyalipennis|COI-5P	CNBRB184-14	ENEA	0.0018	0.0018	0.0018	0	0	0	0	0.0165	0	0	0	0.0165	0	0	0	0	0	0	0	0	0	0	0.0168	0	0	0	0	0	0	0	0.0173	0	0	0	0	0	0	0	0	0.0165	0	0	0	0	0	0	0
[ 93] #CNBRB186-14|KR243522|BIOUG09891-G11|Ctenosciara_hyalipennis|COI-5P	CNBRB186-14	ENEA	0.0017	0.0017	0.0017	0	0	0	0	0.0175	0	0	0	0.0178	0	0	0	0	0	0	0	0	0	0	0.0175	0	0	0	0	0	0	0	0.0184	0	0	0	0	0	0	0	0	0.018	0	0	0	0	0	0	0
[ 94] #CNBRB187-14|KR254068|BIOUG09891-G12|Ctenosciara_hyalipennis|COI-5P	CNBRB187-14	ENEA	0.0018	0.0018	0.0018	0	0	0	0	0.0186	0	0	0	0.0186	0	0	0	0	0	0	0	0	0	0	0.0186	0	0	0	0	0	0	0	0.0192	0	0	0	0	0	0	0	0	0.0186	0	0	0	0	0	0	0
[ 95] #CNBRB192-14|KR253784|BIOUG09891-H05|Ctenosciara_hyalipennis|COI-5P	CNBRB192-14	ENEA	0.0018	0.0018	0.0018	0	0	0	0	0.0179	0	0	0	0.0179	0	0	0	0	0	0	0	0	0	0	0.0179	0	0	0	0	0	0	0	0.0185	0	0	0	0	0	0	0	0	0.018	0	0	0	0	0	0	0
[ 96] #CNBRB196-14|KR255864|BIOUG09891-H09|Ctenosciara_hyalipennis|COI-5P	CNBRB196-14	ENEA	0.0017	0.0017	0.0017	0	0	0	0	0.0172	0	0	0	0.0175	0	0	0	0	0	0	0	0	0	0	0.0175	0	0	0	0	0	0	0	0.0184	0	0	0	0	0	0	0	0	0.0177	0	0	0	0	0	0	0
[ 97] #CNBRB198-14|KR237829|BIOUG09891-H11|Ctenosciara_hyalipennis|COI-5P	CNBRB198-14	ENEA	0.0017	0.0017	0.0017	0	0	0	0	0.0175	0	0	0	0.0175	0	0	0	0	0	0	0	0	0	0	0.0178	0	0	0	0	0	0	0	0.0184	0	0	0	0	0	0	0	0	0.0177	0	0	0	0	0	0	0
[ 98] #CNBRB199-14|KR236355|BIOUG09892-A01|Ctenosciara_hyalipennis|COI-5P	CNBRB199-14	ENEA	0.0019	0.0019	0.0019	0	0	0	0	0.0193	0	0	0	0.0193	0	0	0	0	0	0	0	0	0	0	0.0193	0	0	0	0	0	0	0	0.0193	0	0	0	0	0	0	0	0	0.0193	0	0	0	0	0	0	0
[ 99] #CNBRB200-14|KR254202|BIOUG09892-A02|Ctenosciara_hyalipennis|COI-5P	CNBRB200-14	ENEA	0.0019	0.0019	0.0019	0	0	0	0	0.0188	0	0	0	0.0188	0	0	0	0	0	0	0	0	0	0	0.0188	0	0	0	0	0	0	0	0.0193	0	0	0	0	0	0	0	0	0.0188	0	0	0	0	0	0	0
[ 100] #CNBRB201-14|KR256346|BIOUG09892-A03|Ctenosciara_hyalipennis|COI-5P	CNBRB201-14	ENEA	0.0019	0.0019	0.0019	0	0	0	0	0.017	0	0	0	0.017	0	0	0	0	0	0	0	0	0	0	0.017	0	0	0	0	0	0	0	0.0174	0	0	0	0	0	0	0	0	0.017	0	0	0	0	0	0	0
[ 101] #CNBRB203-14|KR244614|BIOUG09892-A05|Ctenosciara_hyalipennis|COI-5P	CNBRB203-14	ENEA	0.0018	0.0018	0.0018	0	0	0	0	0.0185	0	0	0	0.0185	0	0	0	0	0	0	0	0	0	0	0.0186	0	0	0	0	0	0	0	0.0192	0	0	0	0	0	0	0	0	0.0185	0	0	0	0	0	0	0
[ 102] #CNBRB206-14|KR253254|BIOUG09892-A08|Ctenosciara_hyalipennis|COI-5P	CNBRB206-14	ENEA	0.0017	0.0017	0.0017	0	0	0	0	0.0173	0	0	0	0.0176	0	0	0	0	0	0	0	0	0	0	0.0175	0	0	0	0	0	0	0	0.0184	0	0	0	0	0	0	0	0	0.0177	0	0	0	0	0	0	0
[ 103] #CNBRB208-14|KR236266|BIOUG09892-A10|Ctenosciara_hyalipennis|COI-5P	CNBRB208-14	ENEA	0.0017	0.0017	0.0017	0	0	0	0	0.0176	0	0	0	0.0179	0	0	0	0	0	0	0	0	0	0	0.0176	0	0	0	0	0	0	0	0.0184	0	0	0	0	0	0	0	0	0.0181	0	0	0	0	0	0	0
[ 104] #CNBRB209-14|KR247678|BIOUG09892-A11|Ctenosciara_hyalipennis|COI-5P	CNBRB209-14	ENEA	0.0017	0.0017	0.0017	0	0	0	0	0.0175	0	0	0	0.0175	0	0	0	0	0	0	0	0	0	0	0.0178	0	0	0	0	0	0	0	0.0184	0	0	0	0	0	0	0	0	0.0177	0	0	0	0	0	0	0
[ 105] #CNBRB210-14|KR237396|BIOUG09892-A12|Ctenosciara_hyalipennis|COI-5P	CNBRB210-14	ENEA	0.0018	0.0018	0.0018	0	0	0	0	0.0187	0	0	0	0.0187	0	0	0	0	0	0	0	0	0	0	0.0187	0	0	0	0	0	0	0	0.0192	0	0	0	0	0	0	0	0	0.0187	0	0	0	0	0	0	0
[ 106] #CNBRB212-14|KR249893|BIOUG09892-B02|Ctenosciara_hyalipennis|COI-5P	CNBRB212-14	ENEA	0.0017	0.0017	0.0017	0	0	0	0	0.0172	0	0	0	0.0175	0	0	0	0	0	0	0	0	0	0	0.0175	0	0	0	0	0	0	0	0.0184	0	0	0	0	0	0	0	0	0.0177	0	0	0	0	0	0	0
[ 107] #CNBRB213-14|KR243179|BIOUG09892-B03|Ctenosciara_hyalipennis|COI-5P	CNBRB213-14	ENEA	0.0017	0.0017	0.0017	0	0	0	0	0.0172	0	0	0	0.0175	0	0	0	0	0	0	0	0	0	0	0.0175	0	0	0	0	0	0	0	0.0184	0	0	0	0	0	0	0	0	0.0177	0	0	0	0	0	0	0
[ 108] #CNBRB215-14|KR234840|BIOUG09892-B05|Ctenosciara_hyalipennis|COI-5P	CNBRB215-14	ENEA	0.0017	0.0017	0.0017	0	0	0	0	0.0172	0	0	0	0.0175	0	0	0	0	0	0	0	0	0	0	0.0175	0	0	0	0	0	0	0	0.0184	0	0	0	0	0	0	0	0	0.0177	0	0	0	0	0	0	0
[ 109] #CNBRB219-14|KR256527|BIOUG09892-B09|Ctenosciara_hyalipennis|COI-5P	CNBRB219-14	ENEA	0.0017	0.0017	0.0017	0	0	0	0	0.0172	0	0	0	0.0175	0	0	0	0	0	0	0	0	0	0	0.0175	0	0	0	0	0	0	0	0.0184	0	0	0	0	0	0	0	0	0.0177	0	0	0	0	0	0	0
[ 110] #CNBRB220-14|KR238351|BIOUG09892-B10|Ctenosciara_hyalipennis|COI-5P	CNBRB220-14	ENEA	0.0017	0.0017	0.0017	0	0	0	0	0.0175	0	0	0	0.0175	0	0	0	0	0	0	0	0	0	0	0.0178	0	0	0	0	0	0	0	0.0184	0	0	0	0	0	0	0	0	0.0177	0	0	0	0	0	0	0
[ 111] #CNBRB221-14|KR247209|BIOUG09892-B11|Ctenosciara_hyalipennis|COI-5P	CNBRB221-14	ENEA	0.0017	0.0017	0.0017	0	0	0	0	0.0172	0	0	0	0.0175	0	0	0	0	0	0	0	0	0	0	0.0175	0	0	0	0	0	0	0	0.0184	0	0	0	0	0	0	0	0	0.0177	0	0	0	0	0	0	0
[ 112] #CNBRB225-14|KR241282|BIOUG09892-C03|Ctenosciara_hyalipennis|COI-5P	CNBRB225-14	ENEA	0.0017	0.0017	0.0017	0	0	0	0	0.0172	0	0	0	0.0175	0	0	0	0	0	0	0	0	0	0	0.0175	0	0	0	0	0	0	0	0.0184	0	0	0	0	0	0	0	0	0.0177	0	0	0	0	0	0	0
[ 113] #CNBRB227-14|KR238183|BIOUG09892-C05|Ctenosciara_hyalipennis|COI-5P	CNBRB227-14	ENEA	0.0017	0.0017	0.0017	0	0	0	0	0.0175	0	0	0	0.0175	0	0	0	0	0	0	0	0	0	0	0.0178	0	0	0	0	0	0	0	0.0184	0	0	0	0	0	0	0	0	0.0177	0	0	0	0	0	0	0
[ 114] #CNBRB239-14|KR234713|BIOUG09892-D05|Ctenosciara_hyalipennis|COI-5P	CNBRB239-14	ENEA	0.0017	0.0017	0.0017	0	0	0	0	0.0172	0	0	0	0.0175	0	0	0	0	0	0	0	0	0	0	0.0175	0	0	0	0	0	0	0	0.0184	0	0	0	0	0	0	0	0	0.0177	0	0	0	0	0	0	0
[ 115] #CNBRB240-14|KR240723|BIOUG09892-D06|Ctenosciara_hyalipennis|COI-5P	CNBRB240-14	ENEA	0.0017	0.0017	0.0017	0	0	0	0	0.0172	0	0	0	0.0175	0	0	0	0	0	0	0	0	0	0	0.0175	0	0	0	0	0	0	0	0.0184	0	0	0	0	0	0	0	0	0.0177	0	0	0	0	0	0	0
[ 116] #CNBRB244-14|KR245495|BIOUG09892-D10|Ctenosciara_hyalipennis|COI-5P	CNBRB244-14	ENEA	0.0017	0.0017	0.0017	0	0	0	0	0.0175	0	0	0	0.0178	0	0	0	0	0	0	0	0	0	0	0.0175	0	0	0	0	0	0	0	0.0184	0	0	0	0	0	0	0	0	0.018	0	0	0	0	0	0	0
[ 117] #CNBRB245-14|KR235501|BIOUG09892-D11|Ctenosciara_hyalipennis|COI-5P	CNBRB245-14	ENEA	0.0017	0.0017	0.0017	0	0	0	0	0.0172	0	0	0	0.0175	0	0	0	0	0	0	0	0	0	0	0.0175	0	0	0	0	0	0	0	0.0184	0	0	0	0	0	0	0	0	0.0177	0	0	0	0	0	0	0
[ 118] #CNBRB250-14|KR236637|BIOUG09892-E04|Ctenosciara_hyalipennis|COI-5P	CNBRB250-14	ENEA	0.0017	0.0017	0.0017	0	0	0	0	0.0172	0	0	0	0.0175	0	0	0	0	0	0	0	0	0	0	0.0175	0	0	0	0	0	0	0	0.0184	0	0	0	0	0	0	0	0	0.0177	0	0	0	0	0	0	0
[ 119] #CNBRB254-14|KR246951|BIOUG09892-E08|Ctenosciara_hyalipennis|COI-5P	CNBRB254-14	ENEA	0.0018	0.0018	0.0018	0	0	0	0	0.0178	0	0	0	0.0178	0	0	0	0	0	0	0	0	0	0	0.0178	0	0	0	0	0	0	0	0.0184	0	0	0	0	0	0	0	0	0.018	0	0	0	0	0	0	0
[ 120] #CNBRB257-14|KR256244|BIOUG09892-E11|Ctenosciara_hyalipennis|COI-5P	CNBRB257-14	ENEA	0.0017	0.0017	0.0017	0	0	0	0	0.0172	0	0	0	0.0175	0	0	0	0	0	0	0	0	0	0	0.0175	0	0	0	0	0	0	0	0.0184	0	0	0	0	0	0	0	0	0.0177	0	0	0	0	0	0	0
[ 121] #CNBRB261-14|KR251779|BIOUG09892-F03|Ctenosciara_hyalipennis|COI-5P	CNBRB261-14	ENEA	0.0017	0.0017	0.0017	0	0	0	0	0.0175	0	0	0	0.0175	0	0	0	0	0	0	0	0	0	0	0.0178	0	0	0	0	0	0	0	0.0184	0	0	0	0	0	0	0	0	0.0177	0	0	0	0	0	0	0
[ 122] #CNBRB262-14|KR253501|BIOUG09892-F04|Ctenosciara_hyalipennis|COI-5P	CNBRB262-14	ENEA	0.0017	0.0017	0.0017	0	0	0	0	0.0172	0	0	0	0.0175	0	0	0	0	0	0	0	0	0	0	0.0175	0	0	0	0	0	0	0	0.0184	0	0	0	0	0	0	0	0	0.0177	0	0	0	0	0	0	0
[ 123] #CNBRB264-14|KR244558|BIOUG09892-F06|Ctenosciara_hyalipennis|COI-5P	CNBRB264-14	ENEA	0.0017	0.0017	0.0017	0	0	0	0	0.0172	0	0	0	0.0175	0	0	0	0	0	0	0	0	0	0	0.0175	0	0	0	0	0	0	0	0.0184	0	0	0	0	0	0	0	0	0.0177	0	0	0	0	0	0	0
[ 124] #CNBRB267-14|KR243882|BIOUG09892-F09|Ctenosciara_hyalipennis|COI-5P	CNBRB267-14	ENEA	0.0017	0.0017	0.0017	0	0	0	0	0.0172	0	0	0	0.0175	0	0	0	0	0	0	0	0	0	0	0.0175	0	0	0	0	0	0	0	0.0184	0	0	0	0	0	0	0	0	0.0177	0	0	0	0	0	0	0
[ 125] #CNBRB270-14|KR236764|BIOUG09892-F12|Ctenosciara_hyalipennis|COI-5P	CNBRB270-14	ENEA	0.0018	0.0018	0.0018	0	0	0	0	0.0182	0	0	0	0.0182	0	0	0	0	0	0	0	0	0	0	0.0184	0	0	0	0	0	0	0	0.0189	0	0	0	0	0	0	0	0	0.0182	0	0	0	0	0	0	0
[ 126] #CNBRB271-14|KR255428|BIOUG09892-G01|Ctenosciara_hyalipennis|COI-5P	CNBRB271-14	ENEA	0.0017	0.0017	0.0017	0	0	0	0	0.0172	0	0	0	0.0175	0	0	0	0	0	0	0	0	0	0	0.0175	0	0	0	0	0	0	0	0.0184	0	0	0	0	0	0	0	0	0.0177	0	0	0	0	0	0	0
[ 127] #CNBRB272-14|KR257417|BIOUG09892-G02|Ctenosciara_hyalipennis|COI-5P	CNBRB272-14	ENEA	0.0192	0.0192	0.0192	0.0175	0.0179	0.0175	0.0176	0	0.0175	0.0175	0.0175	0	0.0186	0.0175	0.0179	0.0175	0.0179	0.0182	0.0175	0.0179	0.0175	0.0175	0	0.0175	0.0175	0.0174	0.0175	0.0176	0.0184	0.0175	0	0.0174	0.0182	0.0175	0.0174	0.0178	0.0178	0.0176	0.0175	0	0.0182	0.0177	0.018	0.0179	0.0182	0.0175	0.0175
[ 128] #CNBRB273-14|KR252646|BIOUG09892-G03|Ctenosciara_hyalipennis|COI-5P	CNBRB273-14	ENEA	0.0017	0.0017	0.0017	0	0	0	0	0.0172	0	0	0	0.0175	0	0	0	0	0	0	0	0	0	0	0.0175	0	0	0	0	0	0	0	0.0184	0	0	0	0	0	0	0	0	0.0177	0	0	0	0	0	0	0
[ 129] #CNBRB274-14|KR237054|BIOUG09892-G04|Ctenosciara_hyalipennis|COI-5P	CNBRB274-14	ENEA	0.0017	0.0017	0.0017	0	0	0	0	0.0172	0	0	0	0.0175	0	0	0	0	0	0	0	0	0	0	0.0175	0	0	0	0	0	0	0	0.0184	0	0	0	0	0	0	0	0	0.0177	0	0	0	0	0	0	0
[ 130] #CNBRB277-14|KR245692|BIOUG09892-G07|Ctenosciara_hyalipennis|COI-5P	CNBRB277-14	ENEA	0.0017	0.0017	0.0017	0	0	0	0	0.0172	0	0	0	0.0175	0	0	0	0	0	0	0	0	0	0	0.0175	0	0	0	0	0	0	0	0.0184	0	0	0	0	0	0	0	0	0.0177	0	0	0	0	0	0	0
[ 131] #CNBRB278-14|KR242522|BIOUG09892-G08|Ctenosciara_hyalipennis|COI-5P	CNBRB278-14	ENEA	0.0017	0.0017	0.0017	0	0	0	0	0.0175	0	0	0	0.0178	0	0	0	0	0	0	0	0	0	0	0.0175	0	0	0	0	0	0	0	0.0184	0	0	0	0	0	0	0	0	0.018	0	0	0	0	0	0	0
[ 132] #CNBRB279-14|KR247740|BIOUG09892-G09|Ctenosciara_hyalipennis|COI-5P	CNBRB279-14	ENEA	0.0017	0.0017	0.0017	0	0	0	0	0.0172	0	0	0	0.0175	0	0	0	0	0	0	0	0	0	0	0.0175	0	0	0	0	0	0	0	0.0184	0	0	0	0	0	0	0	0	0.0177	0	0	0	0	0	0	0
[ 133] #CNBRB281-14|KR250111|BIOUG09892-G11|Ctenosciara_hyalipennis|COI-5P	CNBRB281-14	ENEA	0.0017	0.0017	0.0017	0	0	0	0	0.0172	0	0	0	0.0176	0	0	0	0	0	0	0	0	0	0	0.0175	0	0	0	0	0	0	0	0.0184	0	0	0	0	0	0	0	0	0.0177	0	0	0	0	0	0	0
[ 134] #CNBRB282-14|KR242642|BIOUG09892-G12|Ctenosciara_hyalipennis|COI-5P	CNBRB282-14	ENEA	0.0017	0.0017	0.0017	0	0	0	0	0.0172	0	0	0	0.0175	0	0	0	0	0	0	0	0	0	0	0.0175	0	0	0	0	0	0	0	0.0184	0	0	0	0	0	0	0	0	0.0177	0	0	0	0	0	0	0
[ 135] #CNBRB285-14|KR247032|BIOUG09892-H03|Ctenosciara_hyalipennis|COI-5P	CNBRB285-14	ENEA	0.0017	0.0017	0.0017	0	0	0	0	0.0172	0	0	0	0.0175	0	0	0	0	0	0	0	0	0	0	0.0175	0	0	0	0	0	0	0	0.0184	0	0	0	0	0	0	0	0	0.0177	0	0	0	0	0	0	0
[ 136] #CNBRB286-14|KR257177|BIOUG09892-H04|Ctenosciara_hyalipennis|COI-5P	CNBRB286-14	ENEA	0.0017	0.0017	0.0017	0	0	0	0	0.0172	0	0	0	0.0175	0	0	0	0	0	0	0	0	0	0	0.0175	0	0	0	0	0	0	0	0.0184	0	0	0	0	0	0	0	0	0.0177	0	0	0	0	0	0	0
[ 137] #CNBRB288-14|KR253893|BIOUG09892-H06|Ctenosciara_hyalipennis|COI-5P	CNBRB288-14	ENEA	0.0017	0.0017	0.0017	0	0	0	0	0.0172	0	0	0	0.0175	0	0	0	0	0	0	0	0	0	0	0.0175	0	0	0	0	0	0	0	0.0184	0	0	0	0	0	0	0	0	0.0177	0	0	0	0	0	0	0
[ 138] #CNBRB290-14|KR243102|BIOUG09892-H08|Ctenosciara_hyalipennis|COI-5P	CNBRB290-14	ENEA	0.0176	0.0176	0.0176	0.0157	0.0156	0.0157	0.0157	0	0.0157	0.0157	0.0157	0	0.0161	0.0157	0.0161	0.0157	0.016	0.0157	0.0157	0.0161	0.0157	0.0157	0	0.0157	0.0157	0.0156	0.0157	0.0158	0.016	0.0157	0	0.0156	0.0157	0.0157	0.0156	0.016	0.016	0.0157	0.0157	0	0.0157	0.0157	0.0162	0.0156	0.0157	0.0157	0.0157
[ 139] #CNBRB291-14|KR254296|BIOUG09892-H09|Ctenosciara_hyalipennis|COI-5P	CNBRB291-14	ENEA	0.0017	0.0017	0.0017	0	0	0	0	0.0176	0	0	0	0.018	0	0	0	0	0	0	0	0	0	0	0.0176	0	0	0	0	0	0	0	0.0184	0	0	0	0	0	0	0	0	0.0181	0	0	0	0	0	0	0
[ 140] #CNBRB293-14|KR241389|BIOUG09892-H11|Ctenosciara_hyalipennis|COI-5P	CNBRB293-14	ENEA	0.0017	0.0017	0.0017	0	0	0	0	0.0172	0	0	0	0.0175	0	0	0	0	0	0	0	0	0	0	0.0175	0	0	0	0	0	0	0	0.0184	0	0	0	0	0	0	0	0	0.0177	0	0	0	0	0	0	0
[ 141] #CNBRB295-14|KR258685|BIOUG09893-A02|Ctenosciara_hyalipennis|COI-5P	CNBRB295-14	ENEA	0.0017	0.0017	0.0017	0	0	0	0	0.0175	0	0	0	0.0178	0	0	0	0	0	0	0	0	0	0	0.0175	0	0	0	0	0	0	0	0.0184	0	0	0	0	0	0	0	0	0.018	0	0	0	0	0	0	0
[ 142] #CNBRB299-14|KR237224|BIOUG09893-A06|Ctenosciara_hyalipennis|COI-5P	CNBRB299-14	ENEA	0.0017	0.0017	0.0017	0	0	0	0	0.0172	0	0	0	0.0175	0	0	0	0	0	0	0	0	0	0	0.0175	0	0	0	0	0	0	0	0.0184	0	0	0	0	0	0	0	0	0.0177	0	0	0	0	0	0	0
[ 143] #CNBRB300-14|KR248724|BIOUG09893-A07|Ctenosciara_hyalipennis|COI-5P	CNBRB300-14	ENEA	0.0017	0.0017	0.0017	0	0	0	0	0.0172	0	0	0	0.0175	0	0	0	0	0	0	0	0	0	0	0.0175	0	0	0	0	0	0	0	0.0184	0	0	0	0	0	0	0	0	0.0177	0	0	0	0	0	0	0
[ 144] #CNBRB302-14|KR239915|BIOUG09893-A09|Ctenosciara_hyalipennis|COI-5P	CNBRB302-14	ENEA	0.0017	0.0017	0.0017	0	0	0	0	0.0175	0	0	0	0.0175	0	0	0	0	0	0	0	0	0	0	0.0178	0	0	0	0	0	0	0	0.0184	0	0	0	0	0	0	0	0	0.0177	0	0	0	0	0	0	0
[ 145] #CNBRB303-14|KR251068|BIOUG09893-A10|Ctenosciara_hyalipennis|COI-5P	CNBRB303-14	ENEA	0	0	0	0.0017	0.0018	0.0017	0.0017	0.0189	0.0017	0.0017	0.0017	0.0193	0.0018	0.0017	0.0018	0.0017	0.0018	0.0018	0.0017	0.0017	0.0017	0.0017	0.0193	0.0017	0.0017	0.0017	0.0017	0.0017	0.0018	0.0017	0.0202	0.0017	0.0018	0.0017	0.0017	0.0017	0.0017	0.0017	0.0017	0.0195	0.0018	0.0017	0.0018	0.0018	0.0018	0.0017	0.0017
[ 146] #CNBRB304-14|KR251271|BIOUG09893-A11|Ctenosciara_hyalipennis|COI-5P	CNBRB304-14	ENEA	0.0017	0.0017	0.0017	0	0	0	0	0.0174	0	0	0	0.0178	0	0	0	0	0	0	0	0	0	0	0.0175	0	0	0	0	0	0	0	0.0184	0	0	0	0	0	0	0	0	0.018	0	0	0	0	0	0	0
[ 147] #CNBRB305-14|KR243073|BIOUG09893-A12|Ctenosciara_hyalipennis|COI-5P	CNBRB305-14	ENEA	0.0017	0.0017	0.0017	0	0	0	0	0.0172	0	0	0	0.0175	0	0	0	0	0	0	0	0	0	0	0.0175	0	0	0	0	0	0	0	0.0184	0	0	0	0	0	0	0	0	0.0177	0	0	0	0	0	0	0
[ 148] #CNBRB306-14|KR250865|BIOUG09893-B01|Ctenosciara_hyalipennis|COI-5P	CNBRB306-14	ENEA	0.0017	0.0017	0.0017	0	0	0	0	0.0172	0	0	0	0.0175	0	0	0	0	0	0	0	0	0	0	0.0175	0	0	0	0	0	0	0	0.0184	0	0	0	0	0	0	0	0	0.0177	0	0	0	0	0	0	0
[ 149] #CNBRB307-14|KR256787|BIOUG09893-B02|Ctenosciara_hyalipennis|COI-5P	CNBRB307-14	ENEA	0.0018	0.0018	0.0018	0	0	0	0	0.0178	0	0	0	0.0178	0	0	0	0	0	0	0	0	0	0	0.0178	0	0	0	0	0	0	0	0.0184	0	0	0	0	0	0	0	0	0.018	0	0	0	0	0	0	0
[ 150] #CNBRB314-14|KR235072|BIOUG09893-B09|Ctenosciara_hyalipennis|COI-5P	CNBRB314-14	ENEA	0.0017	0.0017	0.0017	0	0	0	0	0.0172	0	0	0	0.0175	0	0	0	0	0	0	0	0	0	0	0.0175	0	0	0	0	0	0	0	0.0184	0	0	0	0	0	0	0	0	0.0177	0	0	0	0	0	0	0
[ 151] #CNBRB315-14|KR258409|BIOUG09893-B10|Ctenosciara_hyalipennis|COI-5P	CNBRB315-14	ENEA	0.0017	0.0017	0.0017	0	0	0	0	0.0172	0	0	0	0.0175	0	0	0	0	0	0	0	0	0	0	0.0175	0	0	0	0	0	0	0	0.0184	0	0	0	0	0	0	0	0	0.0177	0	0	0	0	0	0	0
[ 152] #CNBRB318-14|KR240652|BIOUG09893-C01|Ctenosciara_hyalipennis|COI-5P	CNBRB318-14	ENEA	0.0017	0.0017	0.0017	0	0	0	0	0.0172	0	0	0	0.0175	0	0	0	0	0	0	0	0	0	0	0.0175	0	0	0	0	0	0	0	0.0184	0	0	0	0	0	0	0	0	0.0177	0	0	0	0	0	0	0
[ 153] #CNBRB321-14|KR253934|BIOUG09893-C04|Ctenosciara_hyalipennis|COI-5P	CNBRB321-14	ENEA	0.0017	0.0017	0.0017	0	0	0	0	0.0172	0	0	0	0.0175	0	0	0	0	0	0	0	0	0	0	0.0175	0	0	0	0	0	0	0	0.0184	0	0	0	0	0	0	0	0	0.0177	0	0	0	0	0	0	0
[ 154] #CNBRB327-14|KR254116|BIOUG09893-C10|Ctenosciara_hyalipennis|COI-5P	CNBRB327-14	ENEA	0.0017	0.0017	0.0017	0	0	0	0	0.0172	0	0	0	0.0175	0	0	0	0	0	0	0	0	0	0	0.0175	0	0	0	0	0	0	0	0.0184	0	0	0	0	0	0	0	0	0.0177	0	0	0	0	0	0	0
[ 155] #CNBRB328-14|KR254651|BIOUG09893-C11|Ctenosciara_hyalipennis|COI-5P	CNBRB328-14	ENEA	0.0017	0.0017	0.0017	0	0	0	0	0.0177	0	0	0	0.0177	0	0	0	0	0	0	0	0	0	0	0.0179	0	0	0	0	0	0	0	0.0185	0	0	0	0	0	0	0	0	0.0177	0	0	0	0	0	0	0
[ 156] #CNBRB329-14|KR251613|BIOUG09893-C12|Ctenosciara_hyalipennis|COI-5P	CNBRB329-14	ENEA	0.0017	0.0017	0.0017	0	0	0	0	0.0172	0	0	0	0.0175	0	0	0	0	0	0	0	0	0	0	0.0175	0	0	0	0	0	0	0	0.0184	0	0	0	0	0	0	0	0	0.0177	0	0	0	0	0	0	0
[ 157] #CNBRB331-14|KR239651|BIOUG09893-D02|Ctenosciara_hyalipennis|COI-5P	CNBRB331-14	ENEA	0.0017	0.0017	0.0017	0	0	0	0	0.0172	0	0	0	0.0175	0	0	0	0	0	0	0	0	0	0	0.0175	0	0	0	0	0	0	0	0.0184	0	0	0	0	0	0	0	0	0.0177	0	0	0	0	0	0	0
[ 158] #CNBRB333-14|KR240541|BIOUG09893-D04|Ctenosciara_hyalipennis|COI-5P	CNBRB333-14	ENEA	0.0017	0.0017	0.0017	0	0	0	0	0.0172	0	0	0	0.0175	0	0	0	0	0	0	0	0	0	0	0.0175	0	0	0	0	0	0	0	0.0184	0	0	0	0	0	0	0	0	0.0177	0	0	0	0	0	0	0
[ 159] #CNBRB334-14|KR249615|BIOUG09893-D05|Ctenosciara_hyalipennis|COI-5P	CNBRB334-14	ENEA	0.0017	0.0017	0.0017	0	0	0	0	0.0172	0	0	0	0.0175	0	0	0	0	0	0	0	0	0	0	0.0175	0	0	0	0	0	0	0	0.0184	0	0	0	0	0	0	0	0	0.0177	0	0	0	0	0	0	0
[ 160] #CNBRB337-14|KR245941|BIOUG09893-D08|Ctenosciara_hyalipennis|COI-5P	CNBRB337-14	ENEA	0.0017	0.0017	0.0017	0	0	0	0	0.0175	0	0	0	0.0179	0	0	0	0	0	0	0	0	0	0	0.0175	0	0	0	0	0	0	0	0.0184	0	0	0	0	0	0	0	0	0.018	0	0	0	0	0	0	0
[ 161] #CNBRB340-14|KR244310|BIOUG09893-D11|Ctenosciara_hyalipennis|COI-5P	CNBRB340-14	ENEA	0.0017	0.0017	0.0017	0	0	0	0	0.0175	0	0	0	0.0178	0	0	0	0	0	0	0	0	0	0	0.0175	0	0	0	0	0	0	0	0.0184	0	0	0	0	0	0	0	0	0.018	0	0	0	0	0	0	0
[ 162] #CNBRB342-14|KR253493|BIOUG09893-E01|Ctenosciara_hyalipennis|COI-5P	CNBRB342-14	ENEA	0.0017	0.0017	0.0017	0	0	0	0	0.0172	0	0	0	0.0175	0	0	0	0	0	0	0	0	0	0	0.0175	0	0	0	0	0	0	0	0.0184	0	0	0	0	0	0	0	0	0.0177	0	0	0	0	0	0	0
[ 163] #CNBRB343-14|KR256432|BIOUG09893-E02|Ctenosciara_hyalipennis|COI-5P	CNBRB343-14	ENEA	0.0017	0.0017	0.0017	0	0	0	0	0.0172	0	0	0	0.0175	0	0	0	0	0	0	0	0	0	0	0.0175	0	0	0	0	0	0	0	0.0184	0	0	0	0	0	0	0	0	0.0177	0	0	0	0	0	0	0
[ 164] #CNBRB346-14|KR236771|BIOUG09893-E05|Ctenosciara_hyalipennis|COI-5P	CNBRB346-14	ENEA	0.0017	0.0017	0.0017	0	0	0	0	0.0173	0	0	0	0.0175	0	0	0	0	0	0	0	0	0	0	0.0175	0	0	0	0	0	0	0	0.0184	0	0	0	0	0	0	0	0	0.0177	0	0	0	0	0	0	0
[ 165] #CNBRB347-14|KR250626|BIOUG09893-E06|Ctenosciara_hyalipennis|COI-5P	CNBRB347-14	ENEA	0.0017	0.0017	0.0017	0	0	0	0	0.0172	0	0	0	0.0175	0	0	0	0	0	0	0	0	0	0	0.0175	0	0	0	0	0	0	0	0.0184	0	0	0	0	0	0	0	0	0.0177	0	0	0	0	0	0	0
[ 166] #CNBRB349-14|KR236977|BIOUG09893-E08|Ctenosciara_hyalipennis|COI-5P	CNBRB349-14	ENEA	0.0017	0.0017	0.0017	0	0	0	0	0.0173	0	0	0	0.0175	0	0	0	0	0	0	0	0	0	0	0.0175	0	0	0	0	0	0	0	0.0184	0	0	0	0	0	0	0	0	0.0177	0	0	0	0	0	0	0
[ 167] #CNBRB351-14|KR248419|BIOUG09893-E10|Ctenosciara_hyalipennis|COI-5P	CNBRB351-14	ENEA	0.0017	0.0017	0.0017	0	0	0	0	0.0177	0	0	0	0.0177	0	0	0	0	0	0	0	0	0	0	0.0179	0	0	0	0	0	0	0	0.0185	0	0	0	0	0	0	0	0	0.0177	0	0	0	0	0	0	0
[ 168] #CNBRB353-14|KR257702|BIOUG09893-E12|Ctenosciara_hyalipennis|COI-5P	CNBRB353-14	ENEA	0.0017	0.0017	0.0017	0	0	0	0	0.0172	0	0	0	0.0175	0	0	0	0	0	0	0	0	0	0	0.0175	0	0	0	0	0	0	0	0.0184	0	0	0	0	0	0	0	0	0.0177	0	0	0	0	0	0	0
[ 169] #CNBRB354-14|KR252279|BIOUG09893-F01|Ctenosciara_hyalipennis|COI-5P	CNBRB354-14	ENEA	0.0017	0.0017	0.0017	0	0	0	0	0.0175	0	0	0	0.0178	0	0	0	0	0	0	0	0	0	0	0.0175	0	0	0	0	0	0	0	0.0184	0	0	0	0	0	0	0	0	0.018	0	0	0	0	0	0	0
[ 170] #CNBRB359-14|KR256888|BIOUG09893-F06|Ctenosciara_hyalipennis|COI-5P	CNBRB359-14	ENEA	0.0017	0.0017	0.0017	0	0	0	0	0.0172	0	0	0	0.0175	0	0	0	0	0	0	0	0	0	0	0.0175	0	0	0	0	0	0	0	0.0184	0	0	0	0	0	0	0	0	0.0177	0	0	0	0	0	0	0
[ 171] #CNBRB361-14|KR242439|BIOUG09893-F08|Ctenosciara_hyalipennis|COI-5P	CNBRB361-14	ENEA	0.0018	0.0018	0.0018	0	0	0	0	0.0181	0	0	0	0.0181	0	0	0	0	0	0	0	0	0	0	0.0184	0	0	0	0	0	0	0	0.0189	0	0	0	0	0	0	0	0	0.0181	0	0	0	0	0	0	0
[ 172] #CNBRB362-14|KR253485|BIOUG09893-F09|Ctenosciara_hyalipennis|COI-5P	CNBRB362-14	ENEA	0.0017	0.0017	0.0017	0	0	0	0	0.0174	0	0	0	0.0178	0	0	0	0	0	0	0	0	0	0	0.0175	0	0	0	0	0	0	0	0.0184	0	0	0	0	0	0	0	0	0.018	0	0	0	0	0	0	0
[ 173] #CNBRB365-14|KR253155|BIOUG09893-F12|Ctenosciara_hyalipennis|COI-5P	CNBRB365-14	ENEA	0.0017	0.0017	0.0017	0	0	0	0	0.0172	0	0	0	0.0175	0	0	0	0	0	0	0	0	0	0	0.0175	0	0	0	0	0	0	0	0.0184	0	0	0	0	0	0	0	0	0.0177	0	0	0	0	0	0	0
[ 174] #CNBRB368-14|KR234694|BIOUG09893-G03|Ctenosciara_hyalipennis|COI-5P	CNBRB368-14	ENEA	0.0017	0.0017	0.0017	0	0	0	0	0.0172	0	0	0	0.0175	0	0	0	0	0	0	0	0	0	0	0.0175	0	0	0	0	0	0	0	0.0184	0	0	0	0	0	0	0	0	0.0177	0	0	0	0	0	0	0
[ 175] #CNBRB371-14|KR241793|BIOUG09893-G06|Ctenosciara_hyalipennis|COI-5P	CNBRB371-14	ENEA	0.0017	0.0017	0.0017	0	0	0	0	0.0172	0	0	0	0.0175	0	0	0	0	0	0	0	0	0	0	0.0175	0	0	0	0	0	0	0	0.0184	0	0	0	0	0	0	0	0	0.0177	0	0	0	0	0	0	0
[ 176] #CNBRC045-14|KR245562|BIOUG09937-A01|Ctenosciara_hyalipennis|COI-5P	CNBRC045-14	ENEA	0.0017	0.0017	0.0017	0	0	0	0	0.0172	0	0	0	0.0175	0	0	0	0	0	0	0	0	0	0	0.0175	0	0	0	0	0	0	0	0.0184	0	0	0	0	0	0	0	0	0.0177	0	0	0	0	0	0	0
[ 177] #CNBRC054-14|KR249115|BIOUG09937-A10|Ctenosciara_hyalipennis|COI-5P	CNBRC054-14	ENEA	0.0017	0.0017	0.0017	0	0	0	0	0.0172	0	0	0	0.0175	0	0	0	0	0	0	0	0	0	0	0.0175	0	0	0	0	0	0	0	0.0184	0	0	0	0	0	0	0	0	0.0177	0	0	0	0	0	0	0
[ 178] #CNBRC061-14|KR234256|BIOUG09937-B05|Ctenosciara_hyalipennis|COI-5P	CNBRC061-14	ENEA	0.0017	0.0017	0.0017	0	0	0	0	0.0172	0	0	0	0.0175	0	0	0	0	0	0	0	0	0	0	0.0175	0	0	0	0	0	0	0	0.0184	0	0	0	0	0	0	0	0	0.0177	0	0	0	0	0	0	0
[ 179] #CNBRC086-14|KR247660|BIOUG09937-D06|Ctenosciara_hyalipennis|COI-5P	CNBRC086-14	ENEA	0.0017	0.0017	0.0017	0	0	0	0	0.0172	0	0	0	0.0175	0	0	0	0	0	0	0	0	0	0	0.0175	0	0	0	0	0	0	0	0.0184	0	0	0	0	0	0	0	0	0.0177	0	0	0	0	0	0	0
[ 180] #CNBRC107-14|KR240386|BIOUG09937-F03|Ctenosciara_hyalipennis|COI-5P	CNBRC107-14	ENEA	0.0017	0.0017	0.0017	0	0	0	0	0.0172	0	0	0	0.0175	0	0	0	0	0	0	0	0	0	0	0.0175	0	0	0	0	0	0	0	0.0184	0	0	0	0	0	0	0	0	0.0177	0	0	0	0	0	0	0
[ 181] #CNBRC148-14|KR250839|BIOUG09938-A09|Ctenosciara_hyalipennis|COI-5P	CNBRC148-14	ENEA	0.0017	0.0017	0.0017	0	0	0	0	0.0175	0	0	0	0.0175	0	0	0	0	0	0	0	0	0	0	0.0178	0	0	0	0	0	0	0	0.0184	0	0	0	0	0	0	0	0	0.0177	0	0	0	0	0	0	0
[ 182] #CNBRC152-14|KR245423|BIOUG09938-B01|Ctenosciara_hyalipennis|COI-5P	CNBRC152-14	ENEA	0.0017	0.0017	0.0017	0	0	0	0	0.0175	0	0	0	0.0175	0	0	0	0	0	0	0	0	0	0	0.0178	0	0	0	0	0	0	0	0.0184	0	0	0	0	0	0	0	0	0.0177	0	0	0	0	0	0	0
[ 183] #CNBRC164-14|KR240811|BIOUG09938-C01|Ctenosciara_hyalipennis|COI-5P	CNBRC164-14	ENEA	0.0017	0.0017	0.0017	0	0	0	0	0.0172	0	0	0	0.0175	0	0	0	0	0	0	0	0	0	0	0.0175	0	0	0	0	0	0	0	0.0184	0	0	0	0	0	0	0	0	0.0177	0	0	0	0	0	0	0
[ 184] #CNBRC189-14|KR238513|BIOUG09938-E02|Ctenosciara_hyalipennis|COI-5P	CNBRC189-14	ENEA	0.0017	0.0017	0.0017	0	0	0	0	0.0172	0	0	0	0.0175	0	0	0	0	0	0	0	0	0	0	0.0175	0	0	0	0	0	0	0	0.0184	0	0	0	0	0	0	0	0	0.0177	0	0	0	0	0	0	0
[ 185] #CNBRC201-14|KR246221|BIOUG09938-F02|Ctenosciara_hyalipennis|COI-5P	CNBRC201-14	ENEA	0.0017	0.0017	0.0017	0	0	0	0	0.0172	0	0	0	0.0175	0	0	0	0	0	0	0	0	0	0	0.0175	0	0	0	0	0	0	0	0.0184	0	0	0	0	0	0	0	0	0.0177	0	0	0	0	0	0	0
[ 186] #CNBRD299-14|KR235664|BIOUG09995-A02|Ctenosciara_hyalipennis|COI-5P	CNBRD299-14	ENEA	0.0017	0.0017	0.0017	0	0	0	0	0.0172	0	0	0	0.0175	0	0	0	0	0	0	0	0	0	0	0.0175	0	0	0	0	0	0	0	0.0184	0	0	0	0	0	0	0	0	0.0177	0	0	0	0	0	0	0
[ 187] #CNBRE122-14|KR245346|BIOUG10133-E04|Ctenosciara_hyalipennis|COI-5P	CNBRE122-14	ENEA	0.0017	0.0017	0.0017	0	0	0	0	0.0173	0	0	0	0.0176	0	0	0	0	0	0	0	0	0	0	0.0175	0	0	0	0	0	0	0	0.0184	0	0	0	0	0	0	0	0	0.0177	0	0	0	0	0	0	0
[ 188] #CNBRE876-14|KR255290|BIOUG10331-F10|Ctenosciara_hyalipennis|COI-5P	CNBRE876-14	ENEA	0.0017	0.0017	0.0017	0	0	0	0	0.0173	0	0	0	0.0176	0	0	0	0	0	0	0	0	0	0	0.0175	0	0	0	0	0	0	0	0.0184	0	0	0	0	0	0	0	0	0.0177	0	0	0	0	0	0	0
[ 189] #CNBRF056-14|KR255866|BIOUG10334-B09|Ctenosciara_hyalipennis|COI-5P	CNBRF056-14	ENEA	0.0017	0.0017	0.0017	0	0	0	0	0.0175	0	0	0	0.0178	0	0	0	0	0	0	0	0	0	0	0.0175	0	0	0	0	0	0	0	0.0184	0	0	0	0	0	0	0	0	0.018	0	0	0	0	0	0	0
[ 190] #CNBRF067-14|KR245078|BIOUG10334-C08|Ctenosciara_hyalipennis|COI-5P	CNBRF067-14	ENEA	0.0017	0.0017	0.0017	0	0	0	0	0.0172	0	0	0	0.0175	0	0	0	0	0	0	0	0	0	0	0.0175	0	0	0	0	0	0	0	0.0184	0	0	0	0	0	0	0	0	0.0177	0	0	0	0	0	0	0
[ 191] #CNBRF199-14|KR249400|BIOUG10415-A12|Ctenosciara_hyalipennis|COI-5P	CNBRF199-14	ENEA	0.0018	0.0018	0.0018	0	0	0	0	0.018	0	0	0	0.018	0	0	0	0	0	0	0	0	0	0	0.0183	0	0	0	0	0	0	0	0.0188	0	0	0	0	0	0	0	0	0.018	0	0	0	0	0	0	0
[ 192] #CNBRF209-14|KR254214|BIOUG10415-B10|Ctenosciara_hyalipennis|COI-5P	CNBRF209-14	ENEA	0.0018	0.0018	0.0018	0	0	0	0	0.0183	0	0	0	0.0183	0	0	0	0	0	0	0	0	0	0	0.0186	0	0	0	0	0	0	0	0.0192	0	0	0	0	0	0	0	0	0.0183	0	0	0	0	0	0	0
[ 193] #CNBRF261-14|KR249546|BIOUG10415-G02|Ctenosciara_hyalipennis|COI-5P	CNBRF261-14	ENEA	0.0202	0.0202	0.0202	0.0186	0.0192	0.0183	0.0187	0	0.0183	0.0183	0.0186	0	0.0193	0.0186	0.0186	0.0183	0.0186	0.0193	0.0183	0.0183	0.0186	0.0186	0	0.0183	0.0183	0.0183	0.0183	0.0186	0.0192	0.0183	0	0.0183	0.0193	0.0183	0.0183	0.0183	0.0183	0.0187	0.0186	0	0.0193	0.0188	0.0186	0.0192	0.0193	0.0183	0.0186
[ 194] #CNBRF484-14|KR240691|BIOUG10418-A12|Ctenosciara_hyalipennis|COI-5P	CNBRF484-14	ENEA	0.0017	0.0017	0.0017	0	0	0	0	0.0172	0	0	0	0.0175	0	0	0	0	0	0	0	0	0	0	0.0175	0	0	0	0	0	0	0	0.0184	0	0	0	0	0	0	0	0	0.0177	0	0	0	0	0	0	0
[ 195] #CNBRF635-14|KR251214|BIOUG10419-F08|Ctenosciara_hyalipennis|COI-5P	CNBRF635-14	ENEA	0.0018	0.0018	0.0018	0	0	0	0	0.0181	0	0	0	0.0181	0	0	0	0	0	0	0	0	0	0	0.0184	0	0	0	0	0	0	0	0.0189	0	0	0	0	0	0	0	0	0.0181	0	0	0	0	0	0	0
[ 196] #CNBRF819-14|KR248337|BIOUG10448-F02|Ctenosciara_hyalipennis|COI-5P	CNBRF819-14	ENEA	0.0018	0.0018	0.0018	0	0	0	0	0.0183	0	0	0	0.0183	0	0	0	0	0	0	0	0	0	0	0.0186	0	0	0	0	0	0	0	0.0192	0	0	0	0	0	0	0	0	0.0183	0	0	0	0	0	0	0
[ 197] #CNBRF824-14|KR251953|BIOUG10448-F07|Ctenosciara_hyalipennis|COI-5P	CNBRF824-14	ENEA	0.0018	0.0018	0.0018	0	0	0	0	0.0183	0	0	0	0.0183	0	0	0	0	0	0	0	0	0	0	0.0186	0	0	0	0	0	0	0	0.0192	0	0	0	0	0	0	0	0	0.0183	0	0	0	0	0	0	0
[ 198] #CNBRG007-14|KR238139|BIOUG10453-A03|Ctenosciara_hyalipennis|COI-5P	CNBRG007-14	ENEA	0.0017	0.0017	0.0017	0	0	0	0	0.0174	0	0	0	0.0178	0	0	0	0	0	0	0	0	0	0	0.0175	0	0	0	0	0	0	0	0.0184	0	0	0	0	0	0	0	0	0.018	0	0	0	0	0	0	0
[ 199] #CNBRG013-14|KR249059|BIOUG10453-A09|Ctenosciara_hyalipennis|COI-5P	CNBRG013-14	ENEA	0.0017	0.0017	0.0017	0	0	0	0	0.0172	0	0	0	0.0175	0	0	0	0	0	0	0	0	0	0	0.0175	0	0	0	0	0	0	0	0.0184	0	0	0	0	0	0	0	0	0.0177	0	0	0	0	0	0	0
[ 200] #CNBRG020-14|KR250500|BIOUG10453-B04|Ctenosciara_hyalipennis|COI-5P	CNBRG020-14	ENEA	0.0017	0.0017	0.0017	0	0	0	0	0.0172	0	0	0	0.0175	0	0	0	0	0	0	0	0	0	0	0.0175	0	0	0	0	0	0	0	0.0184	0	0	0	0	0	0	0	0	0.0177	0	0	0	0	0	0	0
[ 201] #CNBRG029-14|KR256122|BIOUG10453-C01|Ctenosciara_hyalipennis|COI-5P	CNBRG029-14	ENEA	0.0018	0.0018	0.0018	0	0	0	0	0.0183	0	0	0	0.0183	0	0	0	0	0	0	0	0	0	0	0.0185	0	0	0	0	0	0	0	0.0191	0	0	0	0	0	0	0	0	0.0183	0	0	0	0	0	0	0
[ 202] #CNBRG032-14|KR250503|BIOUG10453-C04|Ctenosciara_hyalipennis|COI-5P	CNBRG032-14	ENEA	0.0017	0.0017	0.0017	0	0	0	0	0.0172	0	0	0	0.0175	0	0	0	0	0	0	0	0	0	0	0.0175	0	0	0	0	0	0	0	0.0184	0	0	0	0	0	0	0	0	0.0177	0	0	0	0	0	0	0
[ 203] #CNBRG037-14|KR248597|BIOUG10453-C09|Ctenosciara_hyalipennis|COI-5P	CNBRG037-14	ENEA	0.0018	0.0018	0.0018	0	0	0	0	0.0183	0	0	0	0.0183	0	0	0	0	0	0	0	0	0	0	0.0186	0	0	0	0	0	0	0	0.0192	0	0	0	0	0	0	0	0	0.0183	0	0	0	0	0	0	0
[ 204] #CNBRG066-14|KR253104|BIOUG10453-F02|Ctenosciara_hyalipennis|COI-5P	CNBRG066-14	ENEA	0.0017	0.0017	0.0017	0	0	0	0	0.0177	0	0	0	0.0177	0	0	0	0	0	0	0	0	0	0	0.0179	0	0	0	0	0	0	0	0.0185	0	0	0	0	0	0	0	0	0.0177	0	0	0	0	0	0	0
[ 205] #CNBRG096-14|KR249652|BIOUG10453-H08|Ctenosciara_hyalipennis|COI-5P	CNBRG096-14	ENEA	0.0018	0.0018	0.0018	0	0	0	0	0.0166	0	0	0	0.017	0	0	0	0	0	0	0	0	0	0	0.0167	0	0	0	0	0	0	0	0.017	0	0	0	0	0	0	0	0	0.0171	0	0	0	0	0	0	0
[ 206] #CNBRG107-14|KR234832|BIOUG10454-A08|Ctenosciara_hyalipennis|COI-5P	CNBRG107-14	ENEA	0.0017	0.0017	0.0017	0	0	0	0	0.0175	0	0	0	0.0175	0	0	0	0	0	0	0	0	0	0	0.0178	0	0	0	0	0	0	0	0.0184	0	0	0	0	0	0	0	0	0.0177	0	0	0	0	0	0	0
[ 207] #CNBRG114-14|KR247079|BIOUG10454-B03|Ctenosciara_hyalipennis|COI-5P	CNBRG114-14	ENEA	0.0017	0.0017	0.0017	0	0	0	0	0.0172	0	0	0	0.0175	0	0	0	0	0	0	0	0	0	0	0.0175	0	0	0	0	0	0	0	0.0184	0	0	0	0	0	0	0	0	0.0177	0	0	0	0	0	0	0
[ 208] #CNBRG129-14|KR256639|BIOUG10454-C06|Ctenosciara_hyalipennis|COI-5P	CNBRG129-14	ENEA	0.0017	0.0017	0.0017	0	0	0	0	0.0172	0	0	0	0.0175	0	0	0	0	0	0	0	0	0	0	0.0175	0	0	0	0	0	0	0	0.0184	0	0	0	0	0	0	0	0	0.0177	0	0	0	0	0	0	0
[ 209] #CNBRG136-14|KR235909|BIOUG10454-D01|Ctenosciara_hyalipennis|COI-5P	CNBRG136-14	ENEA	0.0017	0.0017	0.0017	0	0	0	0	0.0175	0	0	0	0.0175	0	0	0	0	0	0	0	0	0	0	0.0178	0	0	0	0	0	0	0	0.0184	0	0	0	0	0	0	0	0	0.0177	0	0	0	0	0	0	0
[ 210] #CNBRG159-14|KR243474|BIOUG10454-E12|Ctenosciara_hyalipennis|COI-5P	CNBRG159-14	ENEA	0.0017	0.0017	0.0017	0	0	0	0	0.0172	0	0	0	0.0175	0	0	0	0	0	0	0	0	0	0	0.0175	0	0	0	0	0	0	0	0.0184	0	0	0	0	0	0	0	0	0.0177	0	0	0	0	0	0	0
[ 211] #CNBRG168-14|KR236091|BIOUG10454-F09|Ctenosciara_hyalipennis|COI-5P	CNBRG168-14	ENEA	0.0017	0.0017	0.0017	0	0	0	0	0.0174	0	0	0	0.0175	0	0	0	0	0	0	0	0	0	0	0.0177	0	0	0	0	0	0	0	0.0184	0	0	0	0	0	0	0	0	0.0177	0	0	0	0	0	0	0
[ 212] #CNBRG250-14|KR252212|BIOUG10516-B01|Ctenosciara_hyalipennis|COI-5P	CNBRG250-14	ENEA	0.0017	0.0017	0.0017	0	0	0	0	0.0172	0	0	0	0.0175	0	0	0	0	0	0	0	0	0	0	0.0175	0	0	0	0	0	0	0	0.0184	0	0	0	0	0	0	0	0	0.0177	0	0	0	0	0	0	0
[ 213] #CNBRH108-14|KR248694|BIOUG10518-A04|Ctenosciara_hyalipennis|COI-5P	CNBRH108-14	ENEA	0.0017	0.0017	0.0017	0	0	0	0	0.0173	0	0	0	0.0176	0	0	0	0	0	0	0	0	0	0	0.0175	0	0	0	0	0	0	0	0.0184	0	0	0	0	0	0	0	0	0.0177	0	0	0	0	0	0	0
[ 214] #CNBRH110-14|KR245168|BIOUG10518-A06|Ctenosciara_hyalipennis|COI-5P	CNBRH110-14	ENEA	0.0017	0.0017	0.0017	0	0	0	0	0.0172	0	0	0	0.0176	0	0	0	0	0	0	0	0	0	0	0.0175	0	0	0	0	0	0	0	0.0184	0	0	0	0	0	0	0	0	0.0177	0	0	0	0	0	0	0
[ 215] #CNBRH112-14|KR254313|BIOUG10518-A08|Ctenosciara_hyalipennis|COI-5P	CNBRH112-14	ENEA	0.0017	0.0017	0.0017	0	0	0	0	0.0173	0	0	0	0.0176	0	0	0	0	0	0	0	0	0	0	0.0175	0	0	0	0	0	0	0	0.0184	0	0	0	0	0	0	0	0	0.0177	0	0	0	0	0	0	0
[ 216] #CNBRH135-14|KR253317|BIOUG10518-C07|Ctenosciara_hyalipennis|COI-5P	CNBRH135-14	ENEA	0.0017	0.0017	0.0017	0	0	0	0	0.0173	0	0	0	0.0176	0	0	0	0	0	0	0	0	0	0	0.0175	0	0	0	0	0	0	0	0.0184	0	0	0	0	0	0	0	0	0.0177	0	0	0	0	0	0	0
[ 217] #CNBRH179-14|KR241909|BIOUG10518-G03|Ctenosciara_hyalipennis|COI-5P	CNBRH179-14	ENEA	0.0017	0.0017	0.0017	0	0	0	0	0.0174	0	0	0	0.0176	0	0	0	0	0	0	0	0	0	0	0.0176	0	0	0	0	0	0	0	0.0184	0	0	0	0	0	0	0	0	0.0177	0	0	0	0	0	0	0
[ 218] #CNBRH201-14|KR242792|BIOUG10519-A02|Ctenosciara_hyalipennis|COI-5P	CNBRH201-14	ENEA	0.0017	0.0017	0.0017	0	0	0	0	0.0173	0	0	0	0.0176	0	0	0	0	0	0	0	0	0	0	0.0175	0	0	0	0	0	0	0	0.0184	0	0	0	0	0	0	0	0	0.0177	0	0	0	0	0	0	0
[ 219] #CNBRI029-14|KR256886|BIOUG10533-A09|Ctenosciara_hyalipennis|COI-5P	CNBRI029-14	ENEA	0.0018	0.0018	0.0018	0	0	0	0	0.0167	0	0	0	0.0167	0	0	0	0	0	0	0	0	0	0	0.017	0	0	0	0	0	0	0	0.0175	0	0	0	0	0	0	0	0	0.0167	0	0	0	0	0	0	0
[ 220] #CNBRI053-14|KR239045|BIOUG10533-C09|Ctenosciara_hyalipennis|COI-5P	CNBRI053-14	ENEA	0.0017	0.0017	0.0017	0	0	0	0	0.0175	0	0	0	0.0176	0	0	0	0	0	0	0	0	0	0	0.0178	0	0	0	0	0	0	0	0.0184	0	0	0	0	0	0	0	0	0.0177	0	0	0	0	0	0	0
[ 221] #CNBRI072-14|KR244680|BIOUG10533-E04|Ctenosciara_hyalipennis|COI-5P	CNBRI072-14	ENEA	0.0018	0.0018	0.0018	0	0	0	0	0.0183	0	0	0	0.0183	0	0	0	0	0	0	0	0	0	0	0.0186	0	0	0	0	0	0	0	0.0192	0	0	0	0	0	0	0	0	0.0183	0	0	0	0	0	0	0
[ 222] #CNBRI089-14|KR258187|BIOUG10533-F09|Ctenosciara_hyalipennis|COI-5P	CNBRI089-14	ENEA	0.0017	0.0017	0.0017	0	0	0	0	0.0173	0	0	0	0.0176	0	0	0	0	0	0	0	0	0	0	0.0175	0	0	0	0	0	0	0	0.0184	0	0	0	0	0	0	0	0	0.0177	0	0	0	0	0	0	0
[ 223] #CNBRI100-14|KR240620|BIOUG10533-G08|Ctenosciara_hyalipennis|COI-5P	CNBRI100-14	ENEA	0.0018	0.0018	0.0018	0	0	0	0	0.0168	0	0	0	0.0168	0	0	0	0	0	0	0	0	0	0	0.017	0	0	0	0	0	0	0	0.0176	0	0	0	0	0	0	0	0	0.0168	0	0	0	0	0	0	0
[ 224] #CNBRI102-14|KR244975|BIOUG10533-G10|Ctenosciara_hyalipennis|COI-5P	CNBRI102-14	ENEA	0.0018	0.0018	0.0018	0	0	0	0	0.0183	0	0	0	0.0183	0	0	0	0	0	0	0	0	0	0	0.0186	0	0	0	0	0	0	0	0.0192	0	0	0	0	0	0	0	0	0.0183	0	0	0	0	0	0	0
[ 225] #CNBRI104-14|KR235008|BIOUG10533-G12|Ctenosciara_hyalipennis|COI-5P	CNBRI104-14	ENEA	0.0017	0.0017	0.0017	0	0	0	0	0.0176	0	0	0	0.0176	0	0	0	0	0	0	0	0	0	0	0.0179	0	0	0	0	0	0	0	0.0184	0	0	0	0	0	0	0	0	0.0177	0	0	0	0	0	0	0
[ 226] #CNBRI107-14|KR257652|BIOUG10533-H03|Ctenosciara_hyalipennis|COI-5P	CNBRI107-14	ENEA	0.0017	0.0017	0.0017	0	0	0	0	0.0173	0	0	0	0.0176	0	0	0	0	0	0	0	0	0	0	0.0175	0	0	0	0	0	0	0	0.0184	0	0	0	0	0	0	0	0	0.0177	0	0	0	0	0	0	0
[ 227] #CNBRJ029-14|KR245798|BIOUG10537-B01|Ctenosciara_hyalipennis|COI-5P	CNBRJ029-14	ENEA	0.0017	0.0017	0.0017	0	0	0	0	0.0172	0	0	0	0.0176	0	0	0	0	0	0	0	0	0	0	0.0175	0	0	0	0	0	0	0	0.0184	0	0	0	0	0	0	0	0	0.0177	0	0	0	0	0	0	0
[ 228] #CNBRJ035-14|KR254782|BIOUG10537-B07|Ctenosciara_hyalipennis|COI-5P	CNBRJ035-14	ENEA	0.0017	0.0017	0.0017	0	0	0	0	0.0172	0	0	0	0.0176	0	0	0	0	0	0	0	0	0	0	0.0175	0	0	0	0	0	0	0	0.0184	0	0	0	0	0	0	0	0	0.0177	0	0	0	0	0	0	0
[ 229] #CNBRJ042-14|KR251086|BIOUG10537-C02|Ctenosciara_hyalipennis|COI-5P	CNBRJ042-14	ENEA	0.0017	0.0017	0.0017	0	0	0	0	0.0173	0	0	0	0.0176	0	0	0	0	0	0	0	0	0	0	0.0175	0	0	0	0	0	0	0	0.0184	0	0	0	0	0	0	0	0	0.0177	0	0	0	0	0	0	0
[ 230] #CNBRJ047-14|KR246767|BIOUG10537-C07|Ctenosciara_hyalipennis|COI-5P	CNBRJ047-14	ENEA	0.0017	0.0017	0.0017	0	0	0	0	0.0173	0	0	0	0.0176	0	0	0	0	0	0	0	0	0	0	0.0175	0	0	0	0	0	0	0	0.0184	0	0	0	0	0	0	0	0	0.0177	0	0	0	0	0	0	0
[ 231] #CNBRJ069-14|KR252021|BIOUG10537-E05|Ctenosciara_hyalipennis|COI-5P	CNBRJ069-14	ENEA	0.0017	0.0017	0.0017	0	0	0	0	0.0173	0	0	0	0.0176	0	0	0	0	0	0	0	0	0	0	0.0175	0	0	0	0	0	0	0	0.0184	0	0	0	0	0	0	0	0	0.0177	0	0	0	0	0	0	0
[ 232] #CNBRJ074-14|KR245405|BIOUG10537-E10|Ctenosciara_hyalipennis|COI-5P	CNBRJ074-14	ENEA	0.0017	0.0017	0.0017	0	0	0	0	0.0172	0	0	0	0.0176	0	0	0	0	0	0	0	0	0	0	0.0175	0	0	0	0	0	0	0	0.0184	0	0	0	0	0	0	0	0	0.0177	0	0	0	0	0	0	0
[ 233] #CNBRJ075-14|KR246484|BIOUG10537-E11|Ctenosciara_hyalipennis|COI-5P	CNBRJ075-14	ENEA	0.0017	0.0017	0.0017	0	0	0	0	0.0173	0	0	0	0.0176	0	0	0	0	0	0	0	0	0	0	0.0175	0	0	0	0	0	0	0	0.0184	0	0	0	0	0	0	0	0	0.0177	0	0	0	0	0	0	0
[ 234] #CNBRJ079-14|KR236096|BIOUG10537-F03|Ctenosciara_hyalipennis|COI-5P	CNBRJ079-14	ENEA	0.0017	0.0017	0.0017	0	0	0	0	0.0173	0	0	0	0.0176	0	0	0	0	0	0	0	0	0	0	0.0175	0	0	0	0	0	0	0	0.0184	0	0	0	0	0	0	0	0	0.0177	0	0	0	0	0	0	0
[ 235] #CNBRJ090-14|KR255592|BIOUG10537-G02|Ctenosciara_hyalipennis|COI-5P	CNBRJ090-14	ENEA	0.0018	0.0018	0.0018	0	0	0	0	0.018	0	0	0	0.018	0	0	0	0	0	0	0	0	0	0	0.0183	0	0	0	0	0	0	0	0.0188	0	0	0	0	0	0	0	0	0.018	0	0	0	0	0	0	0
[ 236] #CNBRJ096-14|KR240925|BIOUG10537-G08|Ctenosciara_hyalipennis|COI-5P	CNBRJ096-14	ENEA	0.0018	0.0018	0.0018	0	0	0	0	0.0183	0	0	0	0.0183	0	0	0	0	0	0	0	0	0	0	0.0186	0	0	0	0	0	0	0	0.0192	0	0	0	0	0	0	0	0	0.0183	0	0	0	0	0	0	0
[ 237] #CNBRJ097-14|KR241330|BIOUG10537-G09|Ctenosciara_hyalipennis|COI-5P	CNBRJ097-14	ENEA	0.0017	0.0017	0.0017	0	0	0	0	0.0173	0	0	0	0.0176	0	0	0	0	0	0	0	0	0	0	0.0175	0	0	0	0	0	0	0	0.0184	0	0	0	0	0	0	0	0	0.0177	0	0	0	0	0	0	0
[ 238] #CNBRJ100-14|KR240952|BIOUG10537-G12|Ctenosciara_hyalipennis|COI-5P	CNBRJ100-14	ENEA	0.0017	0.0017	0.0017	0	0	0	0	0.0176	0	0	0	0.0176	0	0	0	0	0	0	0	0	0	0	0.0179	0	0	0	0	0	0	0	0.0184	0	0	0	0	0	0	0	0	0.0177	0	0	0	0	0	0	0
[ 239] #CNBRJ110-14|KR242350|BIOUG10537-H10|Ctenosciara_hyalipennis|COI-5P	CNBRJ110-14	ENEA	0.0017	0.0017	0.0017	0	0	0	0	0.0173	0	0	0	0.0176	0	0	0	0	0	0	0	0	0	0	0.0175	0	0	0	0	0	0	0	0.0184	0	0	0	0	0	0	0	0	0.0177	0	0	0	0	0	0	0
[ 240] #CNBRJ122-14|KR242984|BIOUG10538-A11|Ctenosciara_hyalipennis|COI-5P	CNBRJ122-14	ENEA	0.0017	0.0017	0.0017	0	0	0	0	0.0172	0	0	0	0.0175	0	0	0	0	0	0	0	0	0	0	0.0175	0	0	0	0	0	0	0	0.0184	0	0	0	0	0	0	0	0	0.0177	0	0	0	0	0	0	0
[ 241] #CNBRJ125-14|KR246603|BIOUG10538-B02|Ctenosciara_hyalipennis|COI-5P	CNBRJ125-14	ENEA	0.0017	0.0017	0.0017	0	0	0	0	0.0176	0	0	0	0.0176	0	0	0	0	0	0	0	0	0	0	0.0179	0	0	0	0	0	0	0	0.0184	0	0	0	0	0	0	0	0	0.0177	0	0	0	0	0	0	0
[ 242] #CNBRJ129-14|KR234819|BIOUG10538-B06|Ctenosciara_hyalipennis|COI-5P	CNBRJ129-14	ENEA	0.0018	0.0018	0.0018	0	0	0	0	0.0187	0	0	0	0.0187	0	0	0	0	0	0	0	0	0	0	0.0187	0	0	0	0	0	0	0	0.0193	0	0	0	0	0	0	0	0	0.0187	0	0	0	0	0	0	0
[ 243] #CNBRJ147-14|KR242487|BIOUG10538-C12|Ctenosciara_hyalipennis|COI-5P	CNBRJ147-14	ENEA	0.0018	0.0018	0.0018	0	0	0	0	0.0183	0	0	0	0.0183	0	0	0	0	0	0	0	0	0	0	0.0186	0	0	0	0	0	0	0	0.0192	0	0	0	0	0	0	0	0	0.0183	0	0	0	0	0	0	0
[ 244] #CNBRJ152-14|KR256047|BIOUG10538-D05|Ctenosciara_hyalipennis|COI-5P	CNBRJ152-14	ENEA	0.0018	0.0018	0.0018	0	0	0	0	0.0184	0	0	0	0.0184	0	0	0	0	0	0	0	0	0	0	0.0187	0	0	0	0	0	0	0	0.0193	0	0	0	0	0	0	0	0	0.0184	0	0	0	0	0	0	0
[ 245] #CNBRJ184-14|KR244125|BIOUG10538-G01|Ctenosciara_hyalipennis|COI-5P	CNBRJ184-14	ENEA	0.0018	0.0018	0.0018	0	0	0	0	0.0183	0	0	0	0.0183	0	0	0	0	0	0	0	0	0	0	0.0186	0	0	0	0	0	0	0	0.0192	0	0	0	0	0	0	0	0	0.0183	0	0	0	0	0	0	0
[ 246] #CNBRJ192-14|KR256435|BIOUG10538-G09|Ctenosciara_hyalipennis|COI-5P	CNBRJ192-14	ENEA	0.0018	0.0018	0.0018	0	0	0	0	0.0183	0	0	0	0.0183	0	0	0	0	0	0	0	0	0	0	0.0186	0	0	0	0	0	0	0	0.0192	0	0	0	0	0	0	0	0	0.0183	0	0	0	0	0	0	0
[ 247] #CNBRK087-14|KR235173|BIOUG10672-A01|Ctenosciara_hyalipennis|COI-5P	CNBRK087-14	ENEA	0.0018	0.0018	0.0018	0	0	0	0	0.0183	0	0	0	0.0183	0	0	0	0	0	0	0	0	0	0	0.0186	0	0	0	0	0	0	0	0.0192	0	0	0	0	0	0	0	0	0.0183	0	0	0	0	0	0	0
[ 248] #CNBRK090-14|KR237571|BIOUG10672-A04|Ctenosciara_hyalipennis|COI-5P	CNBRK090-14	ENEA	0.0017	0.0017	0.0017	0	0	0	0	0.0175	0	0	0	0.0179	0	0	0	0	0	0	0	0	0	0	0.0175	0	0	0	0	0	0	0	0.0184	0	0	0	0	0	0	0	0	0.018	0	0	0	0	0	0	0
[ 249] #CNBRK091-14|KR245440|BIOUG10672-A05|Ctenosciara_hyalipennis|COI-5P	CNBRK091-14	ENEA	0.0017	0.0017	0.0017	0	0	0	0	0.0176	0	0	0	0.0176	0	0	0	0	0	0	0	0	0	0	0.0179	0	0	0	0	0	0	0	0.0184	0	0	0	0	0	0	0	0	0.0177	0	0	0	0	0	0	0
[ 250] #CNBRK092-14|KR253983|BIOUG10672-A06|Ctenosciara_hyalipennis|COI-5P	CNBRK092-14	ENEA	0.0017	0.0017	0.0017	0	0	0	0	0.0173	0	0	0	0.0176	0	0	0	0	0	0	0	0	0	0	0.0175	0	0	0	0	0	0	0	0.0184	0	0	0	0	0	0	0	0	0.0177	0	0	0	0	0	0	0
[ 251] #CNBRK097-14|KR238604|BIOUG10672-A11|Ctenosciara_hyalipennis|COI-5P	CNBRK097-14	ENEA	0.0017	0.0017	0.0017	0	0	0	0	0.0176	0	0	0	0.0176	0	0	0	0	0	0	0	0	0	0	0.0179	0	0	0	0	0	0	0	0.0184	0	0	0	0	0	0	0	0	0.0177	0	0	0	0	0	0	0
[ 252] #CNBRK099-14|KR255042|BIOUG10672-B01|Ctenosciara_hyalipennis|COI-5P	CNBRK099-14	ENEA	0.0018	0.0018	0.0018	0	0	0	0	0.018	0	0	0	0.018	0	0	0	0	0	0	0	0	0	0	0.0183	0	0	0	0	0	0	0	0.0188	0	0	0	0	0	0	0	0	0.018	0	0	0	0	0	0	0
[ 253] #CNBRK100-14|KR235649|BIOUG10672-B02|Ctenosciara_hyalipennis|COI-5P	CNBRK100-14	ENEA	0.0017	0.0017	0.0017	0	0	0	0	0.0175	0	0	0	0.0179	0	0	0	0	0	0	0	0	0	0	0.0175	0	0	0	0	0	0	0	0.0184	0	0	0	0	0	0	0	0	0.018	0	0	0	0	0	0	0
[ 254] #CNBRK101-14|KR243724|BIOUG10672-B03|Ctenosciara_hyalipennis|COI-5P	CNBRK101-14	ENEA	0.0017	0.0017	0.0017	0	0	0	0	0.0173	0	0	0	0.0176	0	0	0	0	0	0	0	0	0	0	0.0175	0	0	0	0	0	0	0	0.0184	0	0	0	0	0	0	0	0	0.0177	0	0	0	0	0	0	0
[ 255] #CNBRK102-14|KR251479|BIOUG10672-B04|Ctenosciara_hyalipennis|COI-5P	CNBRK102-14	ENEA	0.0017	0.0017	0.0017	0	0	0	0	0.0173	0	0	0	0.0176	0	0	0	0	0	0	0	0	0	0	0.0175	0	0	0	0	0	0	0	0.0184	0	0	0	0	0	0	0	0	0.0177	0	0	0	0	0	0	0
[ 256] #CNBRK103-14|KR235343|BIOUG10672-B05|Ctenosciara_hyalipennis|COI-5P	CNBRK103-14	ENEA	0.0018	0.0018	0.0018	0	0	0	0	0.0186	0	0	0	0.0186	0	0	0	0	0	0	0	0	0	0	0.0186	0	0	0	0	0	0	0	0.0186	0	0	0	0	0	0	0	0	0.0187	0	0	0	0	0	0	0
[ 257] #CNBRK105-14|KR252352|BIOUG10672-B07|Ctenosciara_hyalipennis|COI-5P	CNBRK105-14	ENEA	0.0017	0.0017	0.0017	0	0	0	0	0.0174	0	0	0	0.0176	0	0	0	0	0	0	0	0	0	0	0.0176	0	0	0	0	0	0	0	0.0184	0	0	0	0	0	0	0	0	0.0177	0	0	0	0	0	0	0
[ 258] #CNBRK106-14|KR237234|BIOUG10672-B08|Ctenosciara_hyalipennis|COI-5P	CNBRK106-14	ENEA	0.0017	0.0017	0.0017	0	0	0	0	0.0173	0	0	0	0.0176	0	0	0	0	0	0	0	0	0	0	0.0175	0	0	0	0	0	0	0	0.0184	0	0	0	0	0	0	0	0	0.0177	0	0	0	0	0	0	0
[ 259] #CNBRK107-14|KR248098|BIOUG10672-B09|Ctenosciara_hyalipennis|COI-5P	CNBRK107-14	ENEA	0.019	0.019	0.019	0.0175	0.018	0.0173	0.0176	0	0.0173	0.0173	0.0175	0	0.0186	0.0175	0.0179	0.0173	0.0179	0.0182	0.0173	0.0176	0.0175	0.0175	0	0.0173	0.0173	0.0173	0.0173	0.0175	0.0184	0.0173	0	0.0173	0.0182	0.0173	0.0173	0.0176	0.0176	0.0176	0.0175	0	0.0182	0.0177	0.018	0.018	0.0182	0.0173	0.0175
[ 260] #CNBRK108-14|KR252200|BIOUG10672-B10|Ctenosciara_hyalipennis|COI-5P	CNBRK108-14	ENEA	0.0017	0.0017	0.0017	0	0	0	0	0.0173	0	0	0	0.0176	0	0	0	0	0	0	0	0	0	0	0.0175	0	0	0	0	0	0	0	0.0184	0	0	0	0	0	0	0	0	0.0177	0	0	0	0	0	0	0
[ 261] #CNBRK109-14|KR249080|BIOUG10672-B11|Ctenosciara_hyalipennis|COI-5P	CNBRK109-14	ENEA	0.0018	0.0018	0.0018	0	0	0	0	0.0185	0	0	0	0.0185	0	0	0	0	0	0	0	0	0	0	0.0185	0	0	0	0	0	0	0	0.0189	0	0	0	0	0	0	0	0	0.0185	0	0	0	0	0	0	0
[ 262] #CNBRK112-14|KR244648|BIOUG10672-C02|Ctenosciara_hyalipennis|COI-5P	CNBRK112-14	ENEA	0.0017	0.0017	0.0017	0	0	0	0	0.0176	0	0	0	0.0176	0	0	0	0	0	0	0	0	0	0	0.0179	0	0	0	0	0	0	0	0.0184	0	0	0	0	0	0	0	0	0.0177	0	0	0	0	0	0	0
[ 263] #CNBRK113-14|KR244403|BIOUG10672-C03|Ctenosciara_hyalipennis|COI-5P	CNBRK113-14	ENEA	0.0017	0.0017	0.0017	0	0	0	0	0.0172	0	0	0	0.0176	0	0	0	0	0	0	0	0	0	0	0.0175	0	0	0	0	0	0	0	0.0184	0	0	0	0	0	0	0	0	0.0177	0	0	0	0	0	0	0
[ 264] #CNBRK115-14|KR251846|BIOUG10672-C05|Ctenosciara_hyalipennis|COI-5P	CNBRK115-14	ENEA	0.0018	0.0018	0.0018	0	0	0	0	0.0183	0	0	0	0.0183	0	0	0	0	0	0	0	0	0	0	0.0183	0	0	0	0	0	0	0	0.0188	0	0	0	0	0	0	0	0	0.0183	0	0	0	0	0	0	0
[ 265] #CNBRK117-14|KR255295|BIOUG10672-C07|Ctenosciara_hyalipennis|COI-5P	CNBRK117-14	ENEA	0.0017	0.0017	0.0017	0	0	0	0	0.0173	0	0	0	0.0176	0	0	0	0	0	0	0	0	0	0	0.0175	0	0	0	0	0	0	0	0.0184	0	0	0	0	0	0	0	0	0.0177	0	0	0	0	0	0	0
[ 266] #CNBRK118-14|KR240341|BIOUG10672-C08|Ctenosciara_hyalipennis|COI-5P	CNBRK118-14	ENEA	0.0017	0.0017	0.0017	0	0	0	0	0.0173	0	0	0	0.0176	0	0	0	0	0	0	0	0	0	0	0.0175	0	0	0	0	0	0	0	0.0184	0	0	0	0	0	0	0	0	0.0177	0	0	0	0	0	0	0
[ 267] #CNBRK119-14|KR258667|BIOUG10672-C09|Ctenosciara_hyalipennis|COI-5P	CNBRK119-14	ENEA	0.0017	0.0017	0.0017	0	0	0	0	0.0172	0	0	0	0.0176	0	0	0	0	0	0	0	0	0	0	0.0175	0	0	0	0	0	0	0	0.0184	0	0	0	0	0	0	0	0	0.0177	0	0	0	0	0	0	0
[ 268] #CNBRK120-14|KR236837|BIOUG10672-C10|Ctenosciara_hyalipennis|COI-5P	CNBRK120-14	ENEA	0.0017	0.0017	0.0017	0	0	0	0	0.0175	0	0	0	0.0179	0	0	0	0	0	0	0	0	0	0	0.0175	0	0	0	0	0	0	0	0.0184	0	0	0	0	0	0	0	0	0.018	0	0	0	0	0	0	0
[ 269] #CNBRK121-14|KR236544|BIOUG10672-C11|Ctenosciara_hyalipennis|COI-5P	CNBRK121-14	ENEA	0.0017	0.0017	0.0017	0	0	0	0	0.0172	0	0	0	0.0176	0	0	0	0	0	0	0	0	0	0	0.0175	0	0	0	0	0	0	0	0.0184	0	0	0	0	0	0	0	0	0.0177	0	0	0	0	0	0	0
[ 270] #CNBRK123-14|KR244090|BIOUG10672-D01|Ctenosciara_hyalipennis|COI-5P	CNBRK123-14	ENEA	0.0018	0.0018	0.0018	0	0	0	0	0.0183	0	0	0	0.0183	0	0	0	0	0	0	0	0	0	0	0.0183	0	0	0	0	0	0	0	0.0188	0	0	0	0	0	0	0	0	0.0183	0	0	0	0	0	0	0
[ 271] #CNBRK124-14|KR237204|BIOUG10672-D02|Ctenosciara_hyalipennis|COI-5P	CNBRK124-14	ENEA	0.0017	0.0017	0.0017	0	0	0	0	0.0175	0	0	0	0.0179	0	0	0	0	0	0	0	0	0	0	0.0175	0	0	0	0	0	0	0	0.0184	0	0	0	0	0	0	0	0	0.018	0	0	0	0	0	0	0
[ 272] #CNBRK125-14|KR250018|BIOUG10672-D03|Ctenosciara_hyalipennis|COI-5P	CNBRK125-14	ENEA	0.0017	0.0017	0.0017	0	0	0	0	0.0172	0	0	0	0.0176	0	0	0	0	0	0	0	0	0	0	0.0175	0	0	0	0	0	0	0	0.0184	0	0	0	0	0	0	0	0	0.0177	0	0	0	0	0	0	0
[ 273] #CNBRK126-14|KR258151|BIOUG10672-D04|Ctenosciara_hyalipennis|COI-5P	CNBRK126-14	ENEA	0.0017	0.0017	0.0017	0	0	0	0	0.0176	0	0	0	0.0179	0	0	0	0	0	0	0	0	0	0	0.0176	0	0	0	0	0	0	0	0.0184	0	0	0	0	0	0	0	0	0.018	0	0	0	0	0	0	0
[ 274] #CNBRK127-14|KR239160|BIOUG10672-D05|Ctenosciara_hyalipennis|COI-5P	CNBRK127-14	ENEA	0.0018	0.0018	0.0018	0	0	0	0	0.0179	0	0	0	0.0179	0	0	0	0	0	0	0	0	0	0	0.0179	0	0	0	0	0	0	0	0.0184	0	0	0	0	0	0	0	0	0.018	0	0	0	0	0	0	0
[ 275] #CNBRK128-14|KR244542|BIOUG10672-D06|Ctenosciara_hyalipennis|COI-5P	CNBRK128-14	ENEA	0.0017	0.0017	0.0017	0	0	0	0	0.0175	0	0	0	0.0179	0	0	0	0	0	0	0	0	0	0	0.0175	0	0	0	0	0	0	0	0.0184	0	0	0	0	0	0	0	0	0.018	0	0	0	0	0	0	0
[ 276] #CNBRK130-14|KR248086|BIOUG10672-D08|Ctenosciara_hyalipennis|COI-5P	CNBRK130-14	ENEA	0.0017	0.0017	0.0017	0	0	0	0	0.0174	0	0	0	0.0176	0	0	0	0	0	0	0	0	0	0	0.0176	0	0	0	0	0	0	0	0.0184	0	0	0	0	0	0	0	0	0.0177	0	0	0	0	0	0	0
[ 277] #CNBRK131-14|KR235429|BIOUG10672-D09|Ctenosciara_hyalipennis|COI-5P	CNBRK131-14	ENEA	0.0017	0.0017	0.0017	0	0	0	0	0.0176	0	0	0	0.0176	0	0	0	0	0	0	0	0	0	0	0.0179	0	0	0	0	0	0	0	0.0184	0	0	0	0	0	0	0	0	0.0177	0	0	0	0	0	0	0
[ 278] #CNBRK132-14|KR244326|BIOUG10672-D10|Ctenosciara_hyalipennis|COI-5P	CNBRK132-14	ENEA	0.0017	0.0017	0.0017	0	0	0	0	0.0174	0	0	0	0.0176	0	0	0	0	0	0	0	0	0	0	0.0176	0	0	0	0	0	0	0	0.0184	0	0	0	0	0	0	0	0	0.0177	0	0	0	0	0	0	0
[ 279] #CNBRK133-14|KR248764|BIOUG10672-D11|Ctenosciara_hyalipennis|COI-5P	CNBRK133-14	ENEA	0.0017	0.0017	0.0017	0	0	0	0	0.0176	0	0	0	0.018	0	0	0	0	0	0	0	0	0	0	0.0176	0	0	0	0	0	0	0	0.0184	0	0	0	0	0	0	0	0	0.0181	0	0	0	0	0	0	0
[ 280] #CNBRK135-14|KR251737|BIOUG10672-E01|Ctenosciara_hyalipennis|COI-5P	CNBRK135-14	ENEA	0.0017	0.0017	0.0017	0	0	0	0	0.0173	0	0	0	0.0176	0	0	0	0	0	0	0	0	0	0	0.0175	0	0	0	0	0	0	0	0.0184	0	0	0	0	0	0	0	0	0.0177	0	0	0	0	0	0	0
[ 281] #CNBRK136-14|KR234897|BIOUG10672-E02|Ctenosciara_hyalipennis|COI-5P	CNBRK136-14	ENEA	0.0018	0.0018	0.0018	0	0	0	0	0.018	0	0	0	0.018	0	0	0	0	0	0	0	0	0	0	0.0183	0	0	0	0	0	0	0	0.0188	0	0	0	0	0	0	0	0	0.018	0	0	0	0	0	0	0
[ 282] #CNBRK137-14|KR242720|BIOUG10672-E03|Ctenosciara_hyalipennis|COI-5P	CNBRK137-14	ENEA	0.0017	0.0017	0.0017	0	0	0	0	0.0173	0	0	0	0.0176	0	0	0	0	0	0	0	0	0	0	0.0175	0	0	0	0	0	0	0	0.0184	0	0	0	0	0	0	0	0	0.0177	0	0	0	0	0	0	0
[ 283] #CNBRK138-14|KR244501|BIOUG10672-E04|Ctenosciara_hyalipennis|COI-5P	CNBRK138-14	ENEA	0.0017	0.0017	0.0017	0	0	0	0	0.0173	0	0	0	0.0176	0	0	0	0	0	0	0	0	0	0	0.0175	0	0	0	0	0	0	0	0.0184	0	0	0	0	0	0	0	0	0.0177	0	0	0	0	0	0	0
[ 284] #CNBRK139-14|KR254505|BIOUG10672-E05|Ctenosciara_hyalipennis|COI-5P	CNBRK139-14	ENEA	0.0017	0.0017	0.0017	0	0	0	0	0.0172	0	0	0	0.0176	0	0	0	0	0	0	0	0	0	0	0.0175	0	0	0	0	0	0	0	0.0184	0	0	0	0	0	0	0	0	0.0177	0	0	0	0	0	0	0
[ 285] #CNBRK140-14|KR247086|BIOUG10672-E06|Ctenosciara_hyalipennis|COI-5P	CNBRK140-14	ENEA	0.0017	0.0017	0.0017	0	0	0	0	0.0175	0	0	0	0.0179	0	0	0	0	0	0	0	0	0	0	0.0175	0	0	0	0	0	0	0	0.0184	0	0	0	0	0	0	0	0	0.018	0	0	0	0	0	0	0
[ 286] #CNBRK142-14|KR253855|BIOUG10672-E08|Ctenosciara_hyalipennis|COI-5P	CNBRK142-14	ENEA	0.0017	0.0017	0.0017	0	0	0	0	0.0176	0	0	0	0.0176	0	0	0	0	0	0	0	0	0	0	0.0179	0	0	0	0	0	0	0	0.0184	0	0	0	0	0	0	0	0	0.0177	0	0	0	0	0	0	0
[ 287] #CNBRK144-14|KR247688|BIOUG10672-E10|Ctenosciara_hyalipennis|COI-5P	CNBRK144-14	ENEA	0.0017	0.0017	0.0017	0	0	0	0	0.0172	0	0	0	0.0176	0	0	0	0	0	0	0	0	0	0	0.0175	0	0	0	0	0	0	0	0.0184	0	0	0	0	0	0	0	0	0.0177	0	0	0	0	0	0	0
[ 288] #CNBRK147-14|KR258521|BIOUG10672-F01|Ctenosciara_hyalipennis|COI-5P	CNBRK147-14	ENEA	0.0017	0.0017	0.0017	0	0	0	0	0.0173	0	0	0	0.0176	0	0	0	0	0	0	0	0	0	0	0.0175	0	0	0	0	0	0	0	0.0184	0	0	0	0	0	0	0	0	0.0177	0	0	0	0	0	0	0
[ 289] #CNBRK149-14|KR250439|BIOUG10672-F03|Ctenosciara_hyalipennis|COI-5P	CNBRK149-14	ENEA	0.0017	0.0017	0.0017	0	0	0	0	0.0173	0	0	0	0.0176	0	0	0	0	0	0	0	0	0	0	0.0175	0	0	0	0	0	0	0	0.0184	0	0	0	0	0	0	0	0	0.0177	0	0	0	0	0	0	0
[ 290] #CNBRK151-14|KR239139|BIOUG10672-F05|Ctenosciara_hyalipennis|COI-5P	CNBRK151-14	ENEA	0.0017	0.0017	0.0017	0	0	0	0	0.0173	0	0	0	0.0176	0	0	0	0	0	0	0	0	0	0	0.0175	0	0	0	0	0	0	0	0.0184	0	0	0	0	0	0	0	0	0.0177	0	0	0	0	0	0	0
[ 291] #CNBRK154-14|KR248767|BIOUG10672-F08|Ctenosciara_hyalipennis|COI-5P	CNBRK154-14	ENEA	0.0194	0.0194	0.0194	0.0179	0.0184	0.0176	0.018	0	0.0176	0.0176	0.0179	0	0.0186	0.0179	0.0179	0.0176	0.0179	0.0186	0.0176	0.0176	0.0179	0.0179	0	0.0176	0.0176	0.0176	0.0176	0.0179	0.0184	0.0176	0	0.0176	0.0186	0.0176	0.0176	0.0176	0.0176	0.018	0.0179	0	0.0186	0.0181	0.018	0.0184	0.0186	0.0176	0.0179
[ 292] #CNBRK155-14|KR248160|BIOUG10672-F09|Ctenosciara_hyalipennis|COI-5P	CNBRK155-14	ENEA	0.0017	0.0017	0.0017	0	0	0	0	0.0172	0	0	0	0.0176	0	0	0	0	0	0	0	0	0	0	0.0175	0	0	0	0	0	0	0	0.0184	0	0	0	0	0	0	0	0	0.0177	0	0	0	0	0	0	0
[ 293] #CNBRK156-14|KR253795|BIOUG10672-F10|Ctenosciara_hyalipennis|COI-5P	CNBRK156-14	ENEA	0.0017	0.0017	0.0017	0	0	0	0	0.0175	0	0	0	0.0176	0	0	0	0	0	0	0	0	0	0	0.0177	0	0	0	0	0	0	0	0.0184	0	0	0	0	0	0	0	0	0.0177	0	0	0	0	0	0	0
[ 294] #CNBRK157-14|KR243224|BIOUG10672-F11|Ctenosciara_hyalipennis|COI-5P	CNBRK157-14	ENEA	0.0194	0.0194	0.0194	0.0179	0.0184	0.0176	0.018	0	0.0176	0.0176	0.0179	0	0.0186	0.0179	0.0179	0.0176	0.0179	0.0186	0.0176	0.0176	0.0179	0.0179	0	0.0176	0.0176	0.0176	0.0176	0.0179	0.0184	0.0176	0	0.0176	0.0186	0.0176	0.0176	0.0176	0.0176	0.018	0.0179	0	0.0186	0.0181	0.018	0.0184	0.0186	0.0176	0.0179
[ 295] #CNBRK158-14|KR246202|BIOUG10672-F12|Ctenosciara_hyalipennis|COI-5P	CNBRK158-14	ENEA	0.0017	0.0017	0.0017	0	0	0	0	0.0175	0	0	0	0.0179	0	0	0	0	0	0	0	0	0	0	0.0175	0	0	0	0	0	0	0	0.0184	0	0	0	0	0	0	0	0	0.018	0	0	0	0	0	0	0
[ 296] #CNBRK159-14|KR253179|BIOUG10672-G01|Ctenosciara_hyalipennis|COI-5P	CNBRK159-14	ENEA	0.0017	0.0017	0.0017	0	0	0	0	0.0173	0	0	0	0.0176	0	0	0	0	0	0	0	0	0	0	0.0175	0	0	0	0	0	0	0	0.0184	0	0	0	0	0	0	0	0	0.0177	0	0	0	0	0	0	0
[ 297] #CNBRK161-14|KR243777|BIOUG10672-G03|Ctenosciara_hyalipennis|COI-5P	CNBRK161-14	ENEA	0.0017	0.0017	0.0017	0	0	0	0	0.0173	0	0	0	0.0176	0	0	0	0	0	0	0	0	0	0	0.0175	0	0	0	0	0	0	0	0.0184	0	0	0	0	0	0	0	0	0.0177	0	0	0	0	0	0	0
[ 298] #CNBRK162-14|KR245919|BIOUG10672-G04|Ctenosciara_hyalipennis|COI-5P	CNBRK162-14	ENEA	0.0017	0.0017	0.0017	0	0	0	0	0.0176	0	0	0	0.0176	0	0	0	0	0	0	0	0	0	0	0.0179	0	0	0	0	0	0	0	0.0184	0	0	0	0	0	0	0	0	0.0177	0	0	0	0	0	0	0
[ 299] #CNBRK163-14|KR235210|BIOUG10672-G05|Ctenosciara_hyalipennis|COI-5P	CNBRK163-14	ENEA	0.0017	0.0017	0.0017	0	0	0	0	0.0173	0	0	0	0.0176	0	0	0	0	0	0	0	0	0	0	0.0175	0	0	0	0	0	0	0	0.0184	0	0	0	0	0	0	0	0	0.0177	0	0	0	0	0	0	0
[ 300] #CNBRK164-14|KR251837|BIOUG10672-G06|Ctenosciara_hyalipennis|COI-5P	CNBRK164-14	ENEA	0.0018	0.0018	0.0018	0	0	0	0	0.0186	0	0	0	0.0186	0	0	0	0	0	0	0	0	0	0	0.0186	0	0	0	0	0	0	0	0.0192	0	0	0	0	0	0	0	0	0.0186	0	0	0	0	0	0	0
[ 301] #CNBRK165-14|KR236790|BIOUG10672-G07|Ctenosciara_hyalipennis|COI-5P	CNBRK165-14	ENEA	0.0018	0.0018	0.0018	0	0	0	0	0.018	0	0	0	0.018	0	0	0	0	0	0	0	0	0	0	0.0183	0	0	0	0	0	0	0	0.0188	0	0	0	0	0	0	0	0	0.018	0	0	0	0	0	0	0
[ 302] #CNBRK166-14|KR236647|BIOUG10672-G08|Ctenosciara_hyalipennis|COI-5P	CNBRK166-14	ENEA	0.0017	0.0017	0.0017	0	0	0	0	0.0172	0	0	0	0.0176	0	0	0	0	0	0	0	0	0	0	0.0175	0	0	0	0	0	0	0	0.0184	0	0	0	0	0	0	0	0	0.0177	0	0	0	0	0	0	0
[ 303] #CNBRK168-14|KR242488|BIOUG10672-G10|Ctenosciara_hyalipennis|COI-5P	CNBRK168-14	ENEA	0.0017	0.0017	0.0017	0	0	0	0	0.0173	0	0	0	0.0176	0	0	0	0	0	0	0	0	0	0	0.0175	0	0	0	0	0	0	0	0.0184	0	0	0	0	0	0	0	0	0.0177	0	0	0	0	0	0	0
[ 304] #CNBRK169-14|KR242981|BIOUG10672-G11|Ctenosciara_hyalipennis|COI-5P	CNBRK169-14	ENEA	0.0017	0.0017	0.0017	0	0	0	0	0.0175	0	0	0	0.0179	0	0	0	0	0	0	0	0	0	0	0.0175	0	0	0	0	0	0	0	0.0184	0	0	0	0	0	0	0	0	0.018	0	0	0	0	0	0	0
[ 305] #CNBRK172-14|KR253459|BIOUG10672-H02|Ctenosciara_hyalipennis|COI-5P	CNBRK172-14	ENEA	0.0017	0.0017	0.0017	0	0	0	0	0.0174	0	0	0	0.0176	0	0	0	0	0	0	0	0	0	0	0.0176	0	0	0	0	0	0	0	0.0184	0	0	0	0	0	0	0	0	0.0177	0	0	0	0	0	0	0
[ 306] #CNBRK173-14|KR242382|BIOUG10672-H03|Ctenosciara_hyalipennis|COI-5P	CNBRK173-14	ENEA	0.0017	0.0017	0.0017	0	0	0	0	0.0174	0	0	0	0.0176	0	0	0	0	0	0	0	0	0	0	0.0176	0	0	0	0	0	0	0	0.0184	0	0	0	0	0	0	0	0	0.0177	0	0	0	0	0	0	0
[ 307] #CNBRK174-14|KR257242|BIOUG10672-H04|Ctenosciara_hyalipennis|COI-5P	CNBRK174-14	ENEA	0.0017	0.0017	0.0017	0	0	0	0	0.0174	0	0	0	0.0176	0	0	0	0	0	0	0	0	0	0	0.0176	0	0	0	0	0	0	0	0.0184	0	0	0	0	0	0	0	0	0.0177	0	0	0	0	0	0	0
[ 308] #CNBRK176-14|KR240279|BIOUG10672-H06|Ctenosciara_hyalipennis|COI-5P	CNBRK176-14	ENEA	0.0017	0.0017	0.0017	0	0	0	0	0.0175	0	0	0	0.0179	0	0	0	0	0	0	0	0	0	0	0.0175	0	0	0	0	0	0	0	0.0184	0	0	0	0	0	0	0	0	0.018	0	0	0	0	0	0	0
[ 309] #CNBRK178-14|KR237335|BIOUG10672-H08|Ctenosciara_hyalipennis|COI-5P	CNBRK178-14	ENEA	0.0017	0.0017	0.0017	0	0	0	0	0.0173	0	0	0	0.0176	0	0	0	0	0	0	0	0	0	0	0.0175	0	0	0	0	0	0	0	0.0184	0	0	0	0	0	0	0	0	0.0177	0	0	0	0	0	0	0
[ 310] #CNBRK179-14|KR258085|BIOUG10672-H09|Ctenosciara_hyalipennis|COI-5P	CNBRK179-14	ENEA	0.0017	0.0017	0.0017	0	0	0	0	0.0173	0	0	0	0.0176	0	0	0	0	0	0	0	0	0	0	0.0175	0	0	0	0	0	0	0	0.0184	0	0	0	0	0	0	0	0	0.0177	0	0	0	0	0	0	0
[ 311] #CNBRK180-14|KR254596|BIOUG10672-H10|Ctenosciara_hyalipennis|COI-5P	CNBRK180-14	ENEA	0.0017	0.0017	0.0017	0	0	0	0	0.0173	0	0	0	0.0176	0	0	0	0	0	0	0	0	0	0	0.0175	0	0	0	0	0	0	0	0.0184	0	0	0	0	0	0	0	0	0.0177	0	0	0	0	0	0	0
[ 312] #CNBRK183-14|KR248132|BIOUG10673-A02|Ctenosciara_hyalipennis|COI-5P	CNBRK183-14	ENEA	0.0017	0.0017	0.0017	0	0	0	0	0.0173	0	0	0	0.0176	0	0	0	0	0	0	0	0	0	0	0.0175	0	0	0	0	0	0	0	0.0184	0	0	0	0	0	0	0	0	0.0177	0	0	0	0	0	0	0
[ 313] #CNBRK185-14|KR244684|BIOUG10673-A04|Ctenosciara_hyalipennis|COI-5P	CNBRK185-14	ENEA	0.0018	0.0018	0.0018	0	0	0	0	0.018	0	0	0	0.018	0	0	0	0	0	0	0	0	0	0	0.0183	0	0	0	0	0	0	0	0.0188	0	0	0	0	0	0	0	0	0.018	0	0	0	0	0	0	0
[ 314] #CNBRK187-14|KR245483|BIOUG10673-A06|Ctenosciara_hyalipennis|COI-5P	CNBRK187-14	ENEA	0.0017	0.0017	0.0017	0	0	0	0	0.0172	0	0	0	0.0176	0	0	0	0	0	0	0	0	0	0	0.0175	0	0	0	0	0	0	0	0.0184	0	0	0	0	0	0	0	0	0.0177	0	0	0	0	0	0	0
[ 315] #CNBRK188-14|KR256824|BIOUG10673-A07|Ctenosciara_hyalipennis|COI-5P	CNBRK188-14	ENEA	0.0017	0.0017	0.0017	0	0	0	0	0.0172	0	0	0	0.0176	0	0	0	0	0	0	0	0	0	0	0.0175	0	0	0	0	0	0	0	0.0184	0	0	0	0	0	0	0	0	0.0177	0	0	0	0	0	0	0
[ 316] #CNBRK189-14|KR255937|BIOUG10673-A08|Ctenosciara_hyalipennis|COI-5P	CNBRK189-14	ENEA	0.0017	0.0017	0.0017	0	0	0	0	0.0173	0	0	0	0.0176	0	0	0	0	0	0	0	0	0	0	0.0175	0	0	0	0	0	0	0	0.0184	0	0	0	0	0	0	0	0	0.0177	0	0	0	0	0	0	0
[ 317] #CNBRK191-14|KR246743|BIOUG10673-A10|Ctenosciara_hyalipennis|COI-5P	CNBRK191-14	ENEA	0.0017	0.0017	0.0017	0	0	0	0	0.0176	0	0	0	0.0176	0	0	0	0	0	0	0	0	0	0	0.0179	0	0	0	0	0	0	0	0.0184	0	0	0	0	0	0	0	0	0.0177	0	0	0	0	0	0	0
[ 318] #CNBRK192-14|KR243917|BIOUG10673-A11|Ctenosciara_hyalipennis|COI-5P	CNBRK192-14	ENEA	0.0018	0.0018	0.0018	0	0	0	0	0.018	0	0	0	0.018	0	0	0	0	0	0	0	0	0	0	0.0183	0	0	0	0	0	0	0	0.0188	0	0	0	0	0	0	0	0	0.018	0	0	0	0	0	0	0
[ 319] #CNBRK193-14|KR257698|BIOUG10673-A12|Ctenosciara_hyalipennis|COI-5P	CNBRK193-14	ENEA	0.0017	0.0017	0.0017	0	0	0	0	0.0174	0	0	0	0.0176	0	0	0	0	0	0	0	0	0	0	0.0176	0	0	0	0	0	0	0	0.0184	0	0	0	0	0	0	0	0	0.0177	0	0	0	0	0	0	0
[ 320] #CNBRK195-14|KR251828|BIOUG10673-B02|Ctenosciara_hyalipennis|COI-5P	CNBRK195-14	ENEA	0.0194	0.0194	0.0194	0.0179	0.0184	0.0176	0.018	0	0.0176	0.0176	0.0179	0	0.0186	0.0179	0.0179	0.0176	0.0179	0.0186	0.0176	0.0176	0.0179	0.0179	0	0.0176	0.0176	0.0176	0.0176	0.0179	0.0184	0.0176	0	0.0176	0.0186	0.0176	0.0176	0.0176	0.0176	0.018	0.0179	0	0.0186	0.0181	0.018	0.0184	0.0186	0.0176	0.0179
[ 321] #CNBRK197-14|KR243873|BIOUG10673-B04|Ctenosciara_hyalipennis|COI-5P	CNBRK197-14	ENEA	0.0017	0.0017	0.0017	0	0	0	0	0.0173	0	0	0	0.0176	0	0	0	0	0	0	0	0	0	0	0.0175	0	0	0	0	0	0	0	0.0184	0	0	0	0	0	0	0	0	0.0177	0	0	0	0	0	0	0
[ 322] #CNBRK198-14|KR237328|BIOUG10673-B05|Ctenosciara_hyalipennis|COI-5P	CNBRK198-14	ENEA	0.0017	0.0017	0.0017	0	0	0	0	0.0173	0	0	0	0.0176	0	0	0	0	0	0	0	0	0	0	0.0175	0	0	0	0	0	0	0	0.0184	0	0	0	0	0	0	0	0	0.0177	0	0	0	0	0	0	0
[ 323] #CNBRK199-14|KR243563|BIOUG10673-B06|Ctenosciara_hyalipennis|COI-5P	CNBRK199-14	ENEA	0.0017	0.0017	0.0017	0	0	0	0	0.0175	0	0	0	0.0179	0	0	0	0	0	0	0	0	0	0	0.0175	0	0	0	0	0	0	0	0.0184	0	0	0	0	0	0	0	0	0.018	0	0	0	0	0	0	0
[ 324] #CNBRK200-14|KR238767|BIOUG10673-B07|Ctenosciara_hyalipennis|COI-5P	CNBRK200-14	ENEA	0.0017	0.0017	0.0017	0	0	0	0	0.0173	0	0	0	0.0176	0	0	0	0	0	0	0	0	0	0	0.0175	0	0	0	0	0	0	0	0.0184	0	0	0	0	0	0	0	0	0.0177	0	0	0	0	0	0	0
[ 325] #CNBRK201-14|KR234251|BIOUG10673-B08|Ctenosciara_hyalipennis|COI-5P	CNBRK201-14	ENEA	0.0017	0.0017	0.0017	0	0	0	0	0.0173	0	0	0	0.0176	0	0	0	0	0	0	0	0	0	0	0.0175	0	0	0	0	0	0	0	0.0184	0	0	0	0	0	0	0	0	0.0177	0	0	0	0	0	0	0
[ 326] #CNBRK202-14|KR256369|BIOUG10673-B09|Ctenosciara_hyalipennis|COI-5P	CNBRK202-14	ENEA	0.0017	0.0017	0.0017	0	0	0	0	0.0172	0	0	0	0.0176	0	0	0	0	0	0	0	0	0	0	0.0175	0	0	0	0	0	0	0	0.0184	0	0	0	0	0	0	0	0	0.0177	0	0	0	0	0	0	0
[ 327] #CNBRK203-14|KR241492|BIOUG10673-B10|Ctenosciara_hyalipennis|COI-5P	CNBRK203-14	ENEA	0.0017	0.0017	0.0017	0	0	0	0	0.0174	0	0	0	0.0176	0	0	0	0	0	0	0	0	0	0	0.0176	0	0	0	0	0	0	0	0.0184	0	0	0	0	0	0	0	0	0.0177	0	0	0	0	0	0	0
[ 328] #CNBRK204-14|KR243311|BIOUG10673-B11|Ctenosciara_hyalipennis|COI-5P	CNBRK204-14	ENEA	0.0017	0.0017	0.0017	0	0	0	0	0.0172	0	0	0	0.0176	0	0	0	0	0	0	0	0	0	0	0.0175	0	0	0	0	0	0	0	0.0184	0	0	0	0	0	0	0	0	0.0177	0	0	0	0	0	0	0
[ 329] #CNBRK205-14|KR237838|BIOUG10673-B12|Ctenosciara_hyalipennis|COI-5P	CNBRK205-14	ENEA	0.0017	0.0017	0.0017	0	0	0	0	0.0174	0	0	0	0.0176	0	0	0	0	0	0	0	0	0	0	0.0176	0	0	0	0	0	0	0	0.0184	0	0	0	0	0	0	0	0	0.0177	0	0	0	0	0	0	0
[ 330] #CNBRK206-14|KR258286|BIOUG10673-C01|Ctenosciara_hyalipennis|COI-5P	CNBRK206-14	ENEA	0.0017	0.0017	0.0017	0	0	0	0	0.0173	0	0	0	0.0176	0	0	0	0	0	0	0	0	0	0	0.0175	0	0	0	0	0	0	0	0.0184	0	0	0	0	0	0	0	0	0.0177	0	0	0	0	0	0	0
[ 331] #CNBRK207-14|KR240449|BIOUG10673-C02|Ctenosciara_hyalipennis|COI-5P	CNBRK207-14	ENEA	0.0017	0.0017	0.0017	0	0	0	0	0.0174	0	0	0	0.0176	0	0	0	0	0	0	0	0	0	0	0.0176	0	0	0	0	0	0	0	0.0184	0	0	0	0	0	0	0	0	0.0177	0	0	0	0	0	0	0
[ 332] #CNBRK208-14|KR242126|BIOUG10673-C03|Ctenosciara_hyalipennis|COI-5P	CNBRK208-14	ENEA	0.0017	0.0017	0.0017	0	0	0	0	0.0172	0	0	0	0.0176	0	0	0	0	0	0	0	0	0	0	0.0175	0	0	0	0	0	0	0	0.0184	0	0	0	0	0	0	0	0	0.0177	0	0	0	0	0	0	0
[ 333] #CNBRK209-14|KR244177|BIOUG10673-C04|Ctenosciara_hyalipennis|COI-5P	CNBRK209-14	ENEA	0.0017	0.0017	0.0017	0	0	0	0	0.0173	0	0	0	0.0176	0	0	0	0	0	0	0	0	0	0	0.0175	0	0	0	0	0	0	0	0.0184	0	0	0	0	0	0	0	0	0.0177	0	0	0	0	0	0	0
[ 334] #CNBRK210-14|KR248394|BIOUG10673-C05|Ctenosciara_hyalipennis|COI-5P	CNBRK210-14	ENEA	0.0018	0.0018	0.0018	0	0	0	0	0.0179	0	0	0	0.0183	0	0	0	0	0	0	0	0	0	0	0.0179	0	0	0	0	0	0	0	0.0184	0	0	0	0	0	0	0	0	0.0184	0	0	0	0	0	0	0
[ 335] #CNBRK211-14|KR252759|BIOUG10673-C06|Ctenosciara_hyalipennis|COI-5P	CNBRK211-14	ENEA	0.0017	0.0017	0.0017	0	0	0	0	0.0175	0	0	0	0.0179	0	0	0	0	0	0	0	0	0	0	0.0175	0	0	0	0	0	0	0	0.0184	0	0	0	0	0	0	0	0	0.018	0	0	0	0	0	0	0
[ 336] #CNBRK212-14|KR244902|BIOUG10673-C07|Ctenosciara_hyalipennis|COI-5P	CNBRK212-14	ENEA	0.0017	0.0017	0.0017	0	0	0	0	0.0172	0	0	0	0.0176	0	0	0	0	0	0	0	0	0	0	0.0175	0	0	0	0	0	0	0	0.0184	0	0	0	0	0	0	0	0	0.0177	0	0	0	0	0	0	0
[ 337] #CNBRK213-14|KR234466|BIOUG10673-C08|Ctenosciara_hyalipennis|COI-5P	CNBRK213-14	ENEA	0.0017	0.0017	0.0017	0	0	0	0	0.0176	0	0	0	0.0176	0	0	0	0	0	0	0	0	0	0	0.0179	0	0	0	0	0	0	0	0.0184	0	0	0	0	0	0	0	0	0.0177	0	0	0	0	0	0	0
[ 338] #CNBRK214-14|KR246923|BIOUG10673-C09|Ctenosciara_hyalipennis|COI-5P	CNBRK214-14	ENEA	0.0017	0.0017	0.0017	0	0	0	0	0.0172	0	0	0	0.0176	0	0	0	0	0	0	0	0	0	0	0.0175	0	0	0	0	0	0	0	0.0184	0	0	0	0	0	0	0	0	0.0177	0	0	0	0	0	0	0
[ 339] #CNBRK215-14|KR243606|BIOUG10673-C10|Ctenosciara_hyalipennis|COI-5P	CNBRK215-14	ENEA	0.0017	0.0017	0.0017	0	0	0	0	0.0172	0	0	0	0.0176	0	0	0	0	0	0	0	0	0	0	0.0175	0	0	0	0	0	0	0	0.0184	0	0	0	0	0	0	0	0	0.0177	0	0	0	0	0	0	0
[ 340] #CNBRK216-14|KR256306|BIOUG10673-C11|Ctenosciara_hyalipennis|COI-5P	CNBRK216-14	ENEA	0.0017	0.0017	0.0017	0	0	0	0	0.0176	0	0	0	0.0176	0	0	0	0	0	0	0	0	0	0	0.0179	0	0	0	0	0	0	0	0.0184	0	0	0	0	0	0	0	0	0.0177	0	0	0	0	0	0	0
[ 341] #CNBRK217-14|KR240680|BIOUG10673-C12|Ctenosciara_hyalipennis|COI-5P	CNBRK217-14	ENEA	0.0018	0.0018	0.0018	0	0	0	0	0.0182	0	0	0	0.0186	0	0	0	0	0	0	0	0	0	0	0.0182	0	0	0	0	0	0	0	0.0186	0	0	0	0	0	0	0	0	0.0187	0	0	0	0	0	0	0
[ 342] #CNBRK220-14|KR241861|BIOUG10673-D03|Ctenosciara_hyalipennis|COI-5P	CNBRK220-14	ENEA	0.0017	0.0017	0.0017	0	0	0	0	0.0173	0	0	0	0.0176	0	0	0	0	0	0	0	0	0	0	0.0175	0	0	0	0	0	0	0	0.0184	0	0	0	0	0	0	0	0	0.0177	0	0	0	0	0	0	0
[ 343] #CNBRK221-14|KR253924|BIOUG10673-D04|Ctenosciara_hyalipennis|COI-5P	CNBRK221-14	ENEA	0.0017	0.0017	0.0017	0	0	0	0	0.0172	0	0	0	0.0176	0	0	0	0	0	0	0	0	0	0	0.0175	0	0	0	0	0	0	0	0.0184	0	0	0	0	0	0	0	0	0.0177	0	0	0	0	0	0	0
[ 344] #CNBRK224-14|KR246196|BIOUG10673-D07|Ctenosciara_hyalipennis|COI-5P	CNBRK224-14	ENEA	0.0017	0.0017	0.0017	0	0	0	0	0.0173	0	0	0	0.0176	0	0	0	0	0	0	0	0	0	0	0.0175	0	0	0	0	0	0	0	0.0184	0	0	0	0	0	0	0	0	0.0177	0	0	0	0	0	0	0
[ 345] #CNBRK225-14|KR235030|BIOUG10673-D08|Ctenosciara_hyalipennis|COI-5P	CNBRK225-14	ENEA	0.0017	0.0017	0.0017	0	0	0	0	0.0176	0	0	0	0.0176	0	0	0	0	0	0	0	0	0	0	0.0179	0	0	0	0	0	0	0	0.0184	0	0	0	0	0	0	0	0	0.0177	0	0	0	0	0	0	0
[ 346] #CNBRK226-14|KR251176|BIOUG10673-D09|Ctenosciara_hyalipennis|COI-5P	CNBRK226-14	ENEA	0.0017	0.0017	0.0017	0	0	0	0	0.0172	0	0	0	0.0176	0	0	0	0	0	0	0	0	0	0	0.0175	0	0	0	0	0	0	0	0.0184	0	0	0	0	0	0	0	0	0.0177	0	0	0	0	0	0	0
[ 347] #CNBRK230-14|KR238509|BIOUG10673-E01|Ctenosciara_hyalipennis|COI-5P	CNBRK230-14	ENEA	0.0017	0.0017	0.0017	0	0	0	0	0.0174	0	0	0	0.0176	0	0	0	0	0	0	0	0	0	0	0.0176	0	0	0	0	0	0	0	0.0184	0	0	0	0	0	0	0	0	0.0177	0	0	0	0	0	0	0
[ 348] #CNBRK231-14|KR239494|BIOUG10673-E02|Ctenosciara_hyalipennis|COI-5P	CNBRK231-14	ENEA	0.0017	0.0017	0.0017	0	0	0	0	0.0173	0	0	0	0.0176	0	0	0	0	0	0	0	0	0	0	0.0175	0	0	0	0	0	0	0	0.0184	0	0	0	0	0	0	0	0	0.0177	0	0	0	0	0	0	0
[ 349] #CNBRK232-14|KR252044|BIOUG10673-E03|Ctenosciara_hyalipennis|COI-5P	CNBRK232-14	ENEA	0.0017	0.0017	0.0017	0	0	0	0	0.0173	0	0	0	0.0176	0	0	0	0	0	0	0	0	0	0	0.0175	0	0	0	0	0	0	0	0.0184	0	0	0	0	0	0	0	0	0.0177	0	0	0	0	0	0	0
[ 350] #CNBRK234-14|KR242334|BIOUG10673-E05|Ctenosciara_hyalipennis|COI-5P	CNBRK234-14	ENEA	0.0017	0.0017	0.0017	0	0	0	0	0.0172	0	0	0	0.0176	0	0	0	0	0	0	0	0	0	0	0.0175	0	0	0	0	0	0	0	0.0184	0	0	0	0	0	0	0	0	0.0177	0	0	0	0	0	0	0
[ 351] #CNBRK235-14|KR255056|BIOUG10673-E06|Ctenosciara_hyalipennis|COI-5P	CNBRK235-14	ENEA	0.0017	0.0017	0.0017	0	0	0	0	0.0173	0	0	0	0.0176	0	0	0	0	0	0	0	0	0	0	0.0175	0	0	0	0	0	0	0	0.0184	0	0	0	0	0	0	0	0	0.0177	0	0	0	0	0	0	0
[ 352] #CNBRK237-14|KR237063|BIOUG10673-E08|Ctenosciara_hyalipennis|COI-5P	CNBRK237-14	ENEA	0.0017	0.0017	0.0017	0	0	0	0	0.0173	0	0	0	0.0176	0	0	0	0	0	0	0	0	0	0	0.0175	0	0	0	0	0	0	0	0.0184	0	0	0	0	0	0	0	0	0.0177	0	0	0	0	0	0	0
[ 353] #CNBRK238-14|KR245032|BIOUG10673-E09|Ctenosciara_hyalipennis|COI-5P	CNBRK238-14	ENEA	0.0017	0.0017	0.0017	0	0	0	0	0.0176	0	0	0	0.018	0	0	0	0	0	0	0	0	0	0	0.0176	0	0	0	0	0	0	0	0.0184	0	0	0	0	0	0	0	0	0.0181	0	0	0	0	0	0	0
[ 354] #CNBRK240-14|KR251871|BIOUG10673-E11|Ctenosciara_hyalipennis|COI-5P	CNBRK240-14	ENEA	0.0017	0.0017	0.0017	0	0	0	0	0.0172	0	0	0	0.0176	0	0	0	0	0	0	0	0	0	0	0.0175	0	0	0	0	0	0	0	0.0184	0	0	0	0	0	0	0	0	0.0177	0	0	0	0	0	0	0
[ 355] #CNBRK241-14|KR250924|BIOUG10673-E12|Ctenosciara_hyalipennis|COI-5P	CNBRK241-14	ENEA	0.0017	0.0017	0.0017	0	0	0	0	0.0172	0	0	0	0.0176	0	0	0	0	0	0	0	0	0	0	0.0175	0	0	0	0	0	0	0	0.0184	0	0	0	0	0	0	0	0	0.0177	0	0	0	0	0	0	0
[ 356] #CNBRK242-14|KR241710|BIOUG10673-F01|Ctenosciara_hyalipennis|COI-5P	CNBRK242-14	ENEA	0.0017	0.0017	0.0017	0	0	0	0	0.0172	0	0	0	0.0176	0	0	0	0	0	0	0	0	0	0	0.0175	0	0	0	0	0	0	0	0.0184	0	0	0	0	0	0	0	0	0.0177	0	0	0	0	0	0	0
[ 357] #CNBRK243-14|KR256311|BIOUG10673-F02|Ctenosciara_hyalipennis|COI-5P	CNBRK243-14	ENEA	0.0017	0.0017	0.0017	0	0	0	0	0.0174	0	0	0	0.0176	0	0	0	0	0	0	0	0	0	0	0.0176	0	0	0	0	0	0	0	0.0184	0	0	0	0	0	0	0	0	0.0177	0	0	0	0	0	0	0
[ 358] #CNBRK244-14|KR254585|BIOUG10673-F03|Ctenosciara_hyalipennis|COI-5P	CNBRK244-14	ENEA	0.0017	0.0017	0.0017	0	0	0	0	0.0173	0	0	0	0.0176	0	0	0	0	0	0	0	0	0	0	0.0175	0	0	0	0	0	0	0	0.0184	0	0	0	0	0	0	0	0	0.0177	0	0	0	0	0	0	0
[ 359] #CNBRK248-14|KR253853|BIOUG10673-F07|Ctenosciara_hyalipennis|COI-5P	CNBRK248-14	ENEA	0.0017	0.0017	0.0017	0	0	0	0	0.0176	0	0	0	0.0176	0	0	0	0	0	0	0	0	0	0	0.0179	0	0	0	0	0	0	0	0.0184	0	0	0	0	0	0	0	0	0.0177	0	0	0	0	0	0	0
[ 360] #CNBRK249-14|KR247391|BIOUG10673-F08|Ctenosciara_hyalipennis|COI-5P	CNBRK249-14	ENEA	0.0017	0.0017	0.0017	0	0	0	0	0.0173	0	0	0	0.0176	0	0	0	0	0	0	0	0	0	0	0.0175	0	0	0	0	0	0	0	0.0184	0	0	0	0	0	0	0	0	0.0177	0	0	0	0	0	0	0
[ 361] #CNBRK250-14|KR235095|BIOUG10673-F09|Ctenosciara_hyalipennis|COI-5P	CNBRK250-14	ENEA	0.0017	0.0017	0.0017	0	0	0	0	0.0174	0	0	0	0.0176	0	0	0	0	0	0	0	0	0	0	0.0176	0	0	0	0	0	0	0	0.0184	0	0	0	0	0	0	0	0	0.0177	0	0	0	0	0	0	0
[ 362] #CNBRK252-14|KR252766|BIOUG10673-F11|Ctenosciara_hyalipennis|COI-5P	CNBRK252-14	ENEA	0.0018	0.0018	0.0018	0	0	0	0	0.018	0	0	0	0.018	0	0	0	0	0	0	0	0	0	0	0.0183	0	0	0	0	0	0	0	0.0188	0	0	0	0	0	0	0	0	0.018	0	0	0	0	0	0	0
[ 363] #CNBRK253-14|KR237701|BIOUG10673-F12|Ctenosciara_hyalipennis|COI-5P	CNBRK253-14	ENEA	0.0017	0.0017	0.0017	0	0	0	0	0.0173	0	0	0	0.0176	0	0	0	0	0	0	0	0	0	0	0.0175	0	0	0	0	0	0	0	0.0184	0	0	0	0	0	0	0	0	0.0177	0	0	0	0	0	0	0
[ 364] #CNBRK255-14|KR250059|BIOUG10673-G02|Ctenosciara_hyalipennis|COI-5P	CNBRK255-14	ENEA	0.0017	0.0017	0.0017	0	0	0	0	0.0176	0	0	0	0.0176	0	0	0	0	0	0	0	0	0	0	0.0179	0	0	0	0	0	0	0	0.0184	0	0	0	0	0	0	0	0	0.0177	0	0	0	0	0	0	0
[ 365] #CNBRK257-14|KR242294|BIOUG10673-G04|Ctenosciara_hyalipennis|COI-5P	CNBRK257-14	ENEA	0.0018	0.0018	0.0018	0	0	0	0	0.0183	0	0	0	0.0183	0	0	0	0	0	0	0	0	0	0	0.0186	0	0	0	0	0	0	0	0.0192	0	0	0	0	0	0	0	0	0.0183	0	0	0	0	0	0	0
[ 366] #CNBRK258-14|KR253758|BIOUG10673-G05|Ctenosciara_hyalipennis|COI-5P	CNBRK258-14	ENEA	0.0018	0.0018	0.0018	0	0	0	0	0.0181	0	0	0	0.0181	0	0	0	0	0	0	0	0	0	0	0.0184	0	0	0	0	0	0	0	0.0189	0	0	0	0	0	0	0	0	0.0181	0	0	0	0	0	0	0
[ 367] #CNBRK260-14|KR234758|BIOUG10673-G07|Ctenosciara_hyalipennis|COI-5P	CNBRK260-14	ENEA	0.0017	0.0017	0.0017	0	0	0	0	0.0174	0	0	0	0.0176	0	0	0	0	0	0	0	0	0	0	0.0176	0	0	0	0	0	0	0	0.0184	0	0	0	0	0	0	0	0	0.0177	0	0	0	0	0	0	0
[ 368] #CNBRK261-14|KR240528|BIOUG10673-G08|Ctenosciara_hyalipennis|COI-5P	CNBRK261-14	ENEA	0.0018	0.0018	0.0018	0	0	0	0	0.0183	0	0	0	0.0183	0	0	0	0	0	0	0	0	0	0	0.0186	0	0	0	0	0	0	0	0.0192	0	0	0	0	0	0	0	0	0.0183	0	0	0	0	0	0	0
[ 369] #CNBRK264-14|KR245340|BIOUG10673-G11|Ctenosciara_hyalipennis|COI-5P	CNBRK264-14	ENEA	0.0017	0.0017	0.0017	0	0	0	0	0.0177	0	0	0	0.0181	0	0	0	0	0	0	0	0	0	0	0.0177	0	0	0	0	0	0	0	0.0184	0	0	0	0	0	0	0	0	0.0182	0	0	0	0	0	0	0
[ 370] #CNBRK265-14|KR235513|BIOUG10673-G12|Ctenosciara_hyalipennis|COI-5P	CNBRK265-14	ENEA	0.0019	0.0019	0.0019	0	0	0	0	0.017	0	0	0	0.017	0	0	0	0	0	0	0	0	0	0	0.017	0	0	0	0	0	0	0	0.0174	0	0	0	0	0	0	0	0	0.017	0	0	0	0	0	0	0
[ 371] #CNBRK266-14|KR246257|BIOUG10673-H01|Ctenosciara_hyalipennis|COI-5P	CNBRK266-14	ENEA	0.0018	0.0018	0.0018	0	0	0	0	0.0181	0	0	0	0.0184	0	0	0	0	0	0	0	0	0	0	0.0181	0	0	0	0	0	0	0	0.0184	0	0	0	0	0	0	0	0	0.0185	0	0	0	0	0	0	0
[ 372] #CNBRK267-14|KR234279|BIOUG10673-H02|Ctenosciara_hyalipennis|COI-5P	CNBRK267-14	ENEA	0.0017	0.0017	0.0017	0	0	0	0	0.0173	0	0	0	0.0176	0	0	0	0	0	0	0	0	0	0	0.0175	0	0	0	0	0	0	0	0.0184	0	0	0	0	0	0	0	0	0.0177	0	0	0	0	0	0	0
[ 373] #CNBRK268-14|KR239920|BIOUG10673-H03|Ctenosciara_hyalipennis|COI-5P	CNBRK268-14	ENEA	0.0017	0.0017	0.0017	0	0	0	0	0.0173	0	0	0	0.0176	0	0	0	0	0	0	0	0	0	0	0.0175	0	0	0	0	0	0	0	0.0184	0	0	0	0	0	0	0	0	0.0177	0	0	0	0	0	0	0
[ 374] #CNBRK272-14|KR250304|BIOUG10673-H07|Ctenosciara_hyalipennis|COI-5P	CNBRK272-14	ENEA	0.0017	0.0017	0.0017	0	0	0	0	0.0172	0	0	0	0.0176	0	0	0	0	0	0	0	0	0	0	0.0175	0	0	0	0	0	0	0	0.0184	0	0	0	0	0	0	0	0	0.0177	0	0	0	0	0	0	0
[ 375] #CNBRK273-14|KR234908|BIOUG10673-H08|Ctenosciara_hyalipennis|COI-5P	CNBRK273-14	ENEA	0.0019	0.0019	0.0019	0	0	0	0	0.0157	0	0	0	0.016	0	0	0	0	0	0	0	0	0	0	0.0157	0	0	0	0	0	0	0	0.016	0	0	0	0	0	0	0	0	0.0162	0	0	0	0	0	0	0
[ 376] #CNBRK274-14|KR248428|BIOUG10673-H09|Ctenosciara_hyalipennis|COI-5P	CNBRK274-14	ENEA	0.0017	0.0017	0.0017	0	0	0	0	0.0173	0	0	0	0.0176	0	0	0	0	0	0	0	0	0	0	0.0175	0	0	0	0	0	0	0	0.0184	0	0	0	0	0	0	0	0	0.0177	0	0	0	0	0	0	0
[ 377] #CNBRK275-14|KR238771|BIOUG10673-H10|Ctenosciara_hyalipennis|COI-5P	CNBRK275-14	ENEA	0.0017	0.0017	0.0017	0	0	0	0	0.0172	0	0	0	0.0176	0	0	0	0	0	0	0	0	0	0	0.0175	0	0	0	0	0	0	0	0.0184	0	0	0	0	0	0	0	0	0.0177	0	0	0	0	0	0	0
[ 378] #CNBRK277-14|KR236819|BIOUG10674-A01|Ctenosciara_hyalipennis|COI-5P	CNBRK277-14	ENEA	0.0017	0.0017	0.0017	0	0	0	0	0.0175	0	0	0	0.0175	0	0	0	0	0	0	0	0	0	0	0.0178	0	0	0	0	0	0	0	0.0184	0	0	0	0	0	0	0	0	0.0177	0	0	0	0	0	0	0
[ 379] #CNBRK278-14|KR244948|BIOUG10674-A02|Ctenosciara_hyalipennis|COI-5P	CNBRK278-14	ENEA	0.0017	0.0017	0.0017	0	0	0	0	0.0172	0	0	0	0.0175	0	0	0	0	0	0	0	0	0	0	0.0175	0	0	0	0	0	0	0	0.0184	0	0	0	0	0	0	0	0	0.0177	0	0	0	0	0	0	0
[ 380] #CNBRK281-14|KR249358|BIOUG10674-A05|Ctenosciara_hyalipennis|COI-5P	CNBRK281-14	ENEA	0.0018	0.0018	0.0018	0	0	0	0	0.0178	0	0	0	0.0178	0	0	0	0	0	0	0	0	0	0	0.0178	0	0	0	0	0	0	0	0.0184	0	0	0	0	0	0	0	0	0.018	0	0	0	0	0	0	0
[ 381] #CNBRK282-14|KR246437|BIOUG10674-A06|Ctenosciara_hyalipennis|COI-5P	CNBRK282-14	ENEA	0.0017	0.0017	0.0017	0	0	0	0	0.0172	0	0	0	0.0175	0	0	0	0	0	0	0	0	0	0	0.0175	0	0	0	0	0	0	0	0.0184	0	0	0	0	0	0	0	0	0.0177	0	0	0	0	0	0	0
[ 382] #CNBRK283-14|KR255850|BIOUG10674-A07|Ctenosciara_hyalipennis|COI-5P	CNBRK283-14	ENEA	0.0017	0.0017	0.0017	0	0	0	0	0.0172	0	0	0	0.0175	0	0	0	0	0	0	0	0	0	0	0.0175	0	0	0	0	0	0	0	0.0184	0	0	0	0	0	0	0	0	0.0177	0	0	0	0	0	0	0
[ 383] #CNBRK285-14|KR241178|BIOUG10674-A09|Ctenosciara_hyalipennis|COI-5P	CNBRK285-14	ENEA	0.0017	0.0017	0.0017	0	0	0	0	0.0175	0	0	0	0.0175	0	0	0	0	0	0	0	0	0	0	0.0178	0	0	0	0	0	0	0	0.0184	0	0	0	0	0	0	0	0	0.0177	0	0	0	0	0	0	0
[ 384] #CNBRK286-14|KR257758|BIOUG10674-A10|Ctenosciara_hyalipennis|COI-5P	CNBRK286-14	ENEA	0.0017	0.0017	0.0017	0	0	0	0	0.0172	0	0	0	0.0175	0	0	0	0	0	0	0	0	0	0	0.0175	0	0	0	0	0	0	0	0.0184	0	0	0	0	0	0	0	0	0.0177	0	0	0	0	0	0	0
[ 385] #CNBRK287-14|KR239517|BIOUG10674-A11|Ctenosciara_hyalipennis|COI-5P	CNBRK287-14	ENEA	0.0017	0.0017	0.0017	0	0	0	0	0.0172	0	0	0	0.0175	0	0	0	0	0	0	0	0	0	0	0.0175	0	0	0	0	0	0	0	0.0184	0	0	0	0	0	0	0	0	0.0177	0	0	0	0	0	0	0
[ 386] #CNBRK288-14|KR248332|BIOUG10674-A12|Ctenosciara_hyalipennis|COI-5P	CNBRK288-14	ENEA	0.0016	0.0016	0.0016	0	0	0	0	0.0172	0	0	0	0.0175	0	0	0	0	0	0	0	0	0	0	0.0175	0	0	0	0	0	0	0	0.0184	0	0	0	0	0	0	0	0	0.0177	0	0	0	0	0	0	0
[ 387] #CNBRK289-14|KR254770|BIOUG10674-B01|Ctenosciara_hyalipennis|COI-5P	CNBRK289-14	ENEA	0.0018	0.0018	0.0018	0	0	0	0	0.0179	0	0	0	0.0179	0	0	0	0	0	0	0	0	0	0	0.0179	0	0	0	0	0	0	0	0.0185	0	0	0	0	0	0	0	0	0.018	0	0	0	0	0	0	0
[ 388] #CNBRK291-14|KR253255|BIOUG10674-B03|Ctenosciara_hyalipennis|COI-5P	CNBRK291-14	ENEA	0.0017	0.0017	0.0017	0	0	0	0	0.0172	0	0	0	0.0175	0	0	0	0	0	0	0	0	0	0	0.0175	0	0	0	0	0	0	0	0.0184	0	0	0	0	0	0	0	0	0.0177	0	0	0	0	0	0	0
[ 389] #CNBRK292-14|KR241949|BIOUG10674-B04|Ctenosciara_hyalipennis|COI-5P	CNBRK292-14	ENEA	0.0017	0.0017	0.0017	0	0	0	0	0.0177	0	0	0	0.0177	0	0	0	0	0	0	0	0	0	0	0.0179	0	0	0	0	0	0	0	0.0185	0	0	0	0	0	0	0	0	0.0177	0	0	0	0	0	0	0
[ 390] #CNBRK294-14|KR245819|BIOUG10674-B06|Ctenosciara_hyalipennis|COI-5P	CNBRK294-14	ENEA	0.0018	0.0018	0.0018	0	0	0	0	0.0183	0	0	0	0.0183	0	0	0	0	0	0	0	0	0	0	0.0186	0	0	0	0	0	0	0	0.0192	0	0	0	0	0	0	0	0	0.0183	0	0	0	0	0	0	0
[ 391] #CNBRK295-14|KR251123|BIOUG10674-B07|Ctenosciara_hyalipennis|COI-5P	CNBRK295-14	ENEA	0.0017	0.0017	0.0017	0	0	0	0	0.0177	0	0	0	0.0177	0	0	0	0	0	0	0	0	0	0	0.0179	0	0	0	0	0	0	0	0.0185	0	0	0	0	0	0	0	0	0.0177	0	0	0	0	0	0	0
[ 392] #CNBRK296-14|KR252247|BIOUG10674-B08|Ctenosciara_hyalipennis|COI-5P	CNBRK296-14	ENEA	0.0017	0.0017	0.0017	0	0	0	0	0.0175	0	0	0	0.0178	0	0	0	0	0	0	0	0	0	0	0.0175	0	0	0	0	0	0	0	0.0184	0	0	0	0	0	0	0	0	0.018	0	0	0	0	0	0	0
[ 393] #CNBRK297-14|KR256340|BIOUG10674-B09|Ctenosciara_hyalipennis|COI-5P	CNBRK297-14	ENEA	0.0017	0.0017	0.0017	0	0	0	0	0.0172	0	0	0	0.0175	0	0	0	0	0	0	0	0	0	0	0.0175	0	0	0	0	0	0	0	0.0184	0	0	0	0	0	0	0	0	0.0177	0	0	0	0	0	0	0
[ 394] #CNBRK299-14|KR251784|BIOUG10674-B11|Ctenosciara_hyalipennis|COI-5P	CNBRK299-14	ENEA	0.0017	0.0017	0.0017	0	0	0	0	0.0172	0	0	0	0.0175	0	0	0	0	0	0	0	0	0	0	0.0175	0	0	0	0	0	0	0	0.0184	0	0	0	0	0	0	0	0	0.0177	0	0	0	0	0	0	0
[ 395] #CNBRK300-14|KR246561|BIOUG10674-B12|Ctenosciara_hyalipennis|COI-5P	CNBRK300-14	ENEA	0.0017	0.0017	0.0017	0	0	0	0	0.0172	0	0	0	0.0175	0	0	0	0	0	0	0	0	0	0	0.0175	0	0	0	0	0	0	0	0.0184	0	0	0	0	0	0	0	0	0.0177	0	0	0	0	0	0	0
[ 396] #CNBRK301-14|KR239312|BIOUG10674-C01|Ctenosciara_hyalipennis|COI-5P	CNBRK301-14	ENEA	0.0017	0.0017	0.0017	0	0	0	0	0.0172	0	0	0	0.0175	0	0	0	0	0	0	0	0	0	0	0.0175	0	0	0	0	0	0	0	0.0184	0	0	0	0	0	0	0	0	0.0177	0	0	0	0	0	0	0
[ 397] #CNBRK302-14|KR258239|BIOUG10674-C02|Ctenosciara_hyalipennis|COI-5P	CNBRK302-14	ENEA	0.0017	0.0017	0.0017	0	0	0	0	0.0172	0	0	0	0.0175	0	0	0	0	0	0	0	0	0	0	0.0175	0	0	0	0	0	0	0	0.0184	0	0	0	0	0	0	0	0	0.0177	0	0	0	0	0	0	0
[ 398] #CNBRK303-14|KR247090|BIOUG10674-C03|Ctenosciara_hyalipennis|COI-5P	CNBRK303-14	ENEA	0.0017	0.0017	0.0017	0	0	0	0	0.0172	0	0	0	0.0175	0	0	0	0	0	0	0	0	0	0	0.0175	0	0	0	0	0	0	0	0.0184	0	0	0	0	0	0	0	0	0.0177	0	0	0	0	0	0	0
[ 399] #CNBRK304-14|KR234872|BIOUG10674-C04|Ctenosciara_hyalipennis|COI-5P	CNBRK304-14	ENEA	0.0017	0.0017	0.0017	0	0	0	0	0.0172	0	0	0	0.0175	0	0	0	0	0	0	0	0	0	0	0.0175	0	0	0	0	0	0	0	0.0184	0	0	0	0	0	0	0	0	0.0177	0	0	0	0	0	0	0
[ 400] #CNBRK305-14|KR256590|BIOUG10674-C05|Ctenosciara_hyalipennis|COI-5P	CNBRK305-14	ENEA	0.0017	0.0017	0.0017	0	0	0	0	0.0172	0	0	0	0.0175	0	0	0	0	0	0	0	0	0	0	0.0175	0	0	0	0	0	0	0	0.0184	0	0	0	0	0	0	0	0	0.0177	0	0	0	0	0	0	0
[ 401] #CNBRK306-14|KR248070|BIOUG10674-C06|Ctenosciara_hyalipennis|COI-5P	CNBRK306-14	ENEA	0.0016	0.0016	0.0016	0	0	0	0	0.0172	0	0	0	0.0175	0	0	0	0	0	0	0	0	0	0	0.0175	0	0	0	0	0	0	0	0.0184	0	0	0	0	0	0	0	0	0.0177	0	0	0	0	0	0	0
[ 402] #CNBRK309-14|KR254745|BIOUG10674-C09|Ctenosciara_hyalipennis|COI-5P	CNBRK309-14	ENEA	0.0017	0.0017	0.0017	0	0	0	0	0.0175	0	0	0	0.0178	0	0	0	0	0	0	0	0	0	0	0.0175	0	0	0	0	0	0	0	0.0184	0	0	0	0	0	0	0	0	0.018	0	0	0	0	0	0	0
[ 403] #CNBRK310-14|KR248464|BIOUG10674-C10|Ctenosciara_hyalipennis|COI-5P	CNBRK310-14	ENEA	0.0017	0.0017	0.0017	0	0	0	0	0.0175	0	0	0	0.0175	0	0	0	0	0	0	0	0	0	0	0.0178	0	0	0	0	0	0	0	0.0184	0	0	0	0	0	0	0	0	0.0177	0	0	0	0	0	0	0
[ 404] #CNBRK312-14|KR244034|BIOUG10674-C12|Ctenosciara_hyalipennis|COI-5P	CNBRK312-14	ENEA	0.0017	0.0017	0.0017	0	0	0	0	0.0172	0	0	0	0.0175	0	0	0	0	0	0	0	0	0	0	0.0175	0	0	0	0	0	0	0	0.0184	0	0	0	0	0	0	0	0	0.0177	0	0	0	0	0	0	0
[ 405] #CNBRK315-14|KR243288|BIOUG10674-D03|Ctenosciara_hyalipennis|COI-5P	CNBRK315-14	ENEA	0.0017	0.0017	0.0017	0	0	0	0	0.0172	0	0	0	0.0175	0	0	0	0	0	0	0	0	0	0	0.0175	0	0	0	0	0	0	0	0.0184	0	0	0	0	0	0	0	0	0.0177	0	0	0	0	0	0	0
[ 406] #CNBRK316-14|KR236494|BIOUG10674-D04|Ctenosciara_hyalipennis|COI-5P	CNBRK316-14	ENEA	0.0016	0.0016	0.0016	0	0	0	0	0.0172	0	0	0	0.0175	0	0	0	0	0	0	0	0	0	0	0.0175	0	0	0	0	0	0	0	0.0184	0	0	0	0	0	0	0	0	0.0177	0	0	0	0	0	0	0
[ 407] #CNBRK317-14|KR241588|BIOUG10674-D05|Ctenosciara_hyalipennis|COI-5P	CNBRK317-14	ENEA	0.0017	0.0017	0.0017	0	0	0	0	0.0172	0	0	0	0.0175	0	0	0	0	0	0	0	0	0	0	0.0175	0	0	0	0	0	0	0	0.0184	0	0	0	0	0	0	0	0	0.0177	0	0	0	0	0	0	0
[ 408] #CNBRK318-14|KR235309|BIOUG10674-D06|Ctenosciara_hyalipennis|COI-5P	CNBRK318-14	ENEA	0.0017	0.0017	0.0017	0	0	0	0	0.0172	0	0	0	0.0175	0	0	0	0	0	0	0	0	0	0	0.0175	0	0	0	0	0	0	0	0.0184	0	0	0	0	0	0	0	0	0.0177	0	0	0	0	0	0	0
[ 409] #CNBRK320-14|KR241738|BIOUG10674-D08|Ctenosciara_hyalipennis|COI-5P	CNBRK320-14	ENEA	0.0017	0.0017	0.0017	0	0	0	0	0.0172	0	0	0	0.0175	0	0	0	0	0	0	0	0	0	0	0.0175	0	0	0	0	0	0	0	0.0184	0	0	0	0	0	0	0	0	0.0177	0	0	0	0	0	0	0
[ 410] #CNBRK321-14|KR245446|BIOUG10674-D09|Ctenosciara_hyalipennis|COI-5P	CNBRK321-14	ENEA	0.0016	0.0016	0.0016	0	0	0	0	0.0172	0	0	0	0.0175	0	0	0	0	0	0	0	0	0	0	0.0175	0	0	0	0	0	0	0	0.0184	0	0	0	0	0	0	0	0	0.0177	0	0	0	0	0	0	0
[ 411] #CNBRK322-14|KR246395|BIOUG10674-D10|Ctenosciara_hyalipennis|COI-5P	CNBRK322-14	ENEA	0.0016	0.0016	0.0016	0	0	0	0	0.0172	0	0	0	0.0175	0	0	0	0	0	0	0	0	0	0	0.0175	0	0	0	0	0	0	0	0.0184	0	0	0	0	0	0	0	0	0.0177	0	0	0	0	0	0	0
[ 412] #CNBRK324-14|KR252650|BIOUG10674-D12|Ctenosciara_hyalipennis|COI-5P	CNBRK324-14	ENEA	0.0017	0.0017	0.0017	0	0	0	0	0.0172	0	0	0	0.0175	0	0	0	0	0	0	0	0	0	0	0.0175	0	0	0	0	0	0	0	0.0184	0	0	0	0	0	0	0	0	0.0177	0	0	0	0	0	0	0
[ 413] #CNBRK325-14|KR242750|BIOUG10674-E01|Ctenosciara_hyalipennis|COI-5P	CNBRK325-14	ENEA	0.0017	0.0017	0.0017	0	0	0	0	0.0176	0	0	0	0.0176	0	0	0	0	0	0	0	0	0	0	0.0179	0	0	0	0	0	0	0	0.0184	0	0	0	0	0	0	0	0	0.0177	0	0	0	0	0	0	0
[ 414] #CNBRK326-14|KR243499|BIOUG10674-E02|Ctenosciara_hyalipennis|COI-5P	CNBRK326-14	ENEA	0.0016	0.0016	0.0016	0	0	0	0	0.0172	0	0	0	0.0175	0	0	0	0	0	0	0	0	0	0	0.0175	0	0	0	0	0	0	0	0.0184	0	0	0	0	0	0	0	0	0.0177	0	0	0	0	0	0	0
[ 415] #CNBRK328-14|KR247198|BIOUG10674-E04|Ctenosciara_hyalipennis|COI-5P	CNBRK328-14	ENEA	0.0017	0.0017	0.0017	0	0	0	0	0.0172	0	0	0	0.0175	0	0	0	0	0	0	0	0	0	0	0.0175	0	0	0	0	0	0	0	0.0184	0	0	0	0	0	0	0	0	0.0177	0	0	0	0	0	0	0
[ 416] #CNBRK329-14|KR247674|BIOUG10674-E05|Ctenosciara_hyalipennis|COI-5P	CNBRK329-14	ENEA	0.0017	0.0017	0.0017	0	0	0	0	0.0177	0	0	0	0.0177	0	0	0	0	0	0	0	0	0	0	0.018	0	0	0	0	0	0	0	0.0185	0	0	0	0	0	0	0	0	0.0177	0	0	0	0	0	0	0
[ 417] #CNBRK331-14|KR251747|BIOUG10674-E07|Ctenosciara_hyalipennis|COI-5P	CNBRK331-14	ENEA	0.0017	0.0017	0.0017	0	0	0	0	0.0172	0	0	0	0.0175	0	0	0	0	0	0	0	0	0	0	0.0175	0	0	0	0	0	0	0	0.0184	0	0	0	0	0	0	0	0	0.0177	0	0	0	0	0	0	0
[ 418] #CNBRK332-14|KR247133|BIOUG10674-E08|Ctenosciara_hyalipennis|COI-5P	CNBRK332-14	ENEA	0.0189	0.0189	0.0189	0.0175	0.018	0.0172	0.0176	0	0.0172	0.0172	0.0175	0	0.0186	0.0175	0.0179	0.0172	0.0179	0.0182	0.0172	0.0176	0.0175	0.0175	0	0.0172	0.0172	0.0172	0.0172	0.0175	0.0184	0.0172	0	0.0172	0.0182	0.0172	0.0172	0.0175	0.0175	0.0176	0.0175	0	0.0182	0.0177	0.018	0.018	0.0182	0.0172	0.0175
[ 419] #CNBRK333-14|KR247159|BIOUG10674-E09|Ctenosciara_hyalipennis|COI-5P	CNBRK333-14	ENEA	0.0017	0.0017	0.0017	0	0	0	0	0.0172	0	0	0	0.0175	0	0	0	0	0	0	0	0	0	0	0.0175	0	0	0	0	0	0	0	0.0184	0	0	0	0	0	0	0	0	0.0177	0	0	0	0	0	0	0
[ 420] #CNBRK335-14|KR241846|BIOUG10674-E11|Ctenosciara_hyalipennis|COI-5P	CNBRK335-14	ENEA	0.0017	0.0017	0.0017	0	0	0	0	0.0172	0	0	0	0.0175	0	0	0	0	0	0	0	0	0	0	0.0175	0	0	0	0	0	0	0	0.0184	0	0	0	0	0	0	0	0	0.0177	0	0	0	0	0	0	0
[ 421] #CNBRK337-14|KR237846|BIOUG10674-F01|Ctenosciara_hyalipennis|COI-5P	CNBRK337-14	ENEA	0.0016	0.0016	0.0016	0	0	0	0	0.0172	0	0	0	0.0175	0	0	0	0	0	0	0	0	0	0	0.0175	0	0	0	0	0	0	0	0.0184	0	0	0	0	0	0	0	0	0.0177	0	0	0	0	0	0	0
[ 422] #CNBRK338-14|KR248848|BIOUG10674-F02|Ctenosciara_hyalipennis|COI-5P	CNBRK338-14	ENEA	0.0017	0.0017	0.0017	0	0	0	0	0.0175	0	0	0	0.0178	0	0	0	0	0	0	0	0	0	0	0.0175	0	0	0	0	0	0	0	0.0184	0	0	0	0	0	0	0	0	0.018	0	0	0	0	0	0	0
[ 423] #CNBRK339-14|KR258418|BIOUG10674-F03|Ctenosciara_hyalipennis|COI-5P	CNBRK339-14	ENEA	0.0017	0.0017	0.0017	0	0	0	0	0.0175	0	0	0	0.0178	0	0	0	0	0	0	0	0	0	0	0.0175	0	0	0	0	0	0	0	0.0184	0	0	0	0	0	0	0	0	0.018	0	0	0	0	0	0	0
[ 424] #CNBRK340-14|KR237263|BIOUG10674-F04|Ctenosciara_hyalipennis|COI-5P	CNBRK340-14	ENEA	0.0193	0.0193	0.0193	0.0178	0.0184	0.0175	0.018	0	0.0175	0.0175	0.0178	0	0.0186	0.0178	0.0179	0.0175	0.0179	0.0185	0.0175	0.0176	0.0178	0.0178	0	0.0175	0.0175	0.0175	0.0175	0.0178	0.0184	0.0175	0	0.0175	0.0185	0.0175	0.0175	0.0175	0.0175	0.018	0.0178	0	0.0185	0.018	0.018	0.0184	0.0185	0.0175	0.0178
[ 425] #CNBRK341-14|KR247284|BIOUG10674-F05|Ctenosciara_hyalipennis|COI-5P	CNBRK341-14	ENEA	0.0017	0.0017	0.0017	0	0	0	0	0.0175	0	0	0	0.0175	0	0	0	0	0	0	0	0	0	0	0.0178	0	0	0	0	0	0	0	0.0184	0	0	0	0	0	0	0	0	0.0177	0	0	0	0	0	0	0
[ 426] #CNBRK343-14|KR245773|BIOUG10674-F07|Ctenosciara_hyalipennis|COI-5P	CNBRK343-14	ENEA	0.0017	0.0017	0.0017	0	0	0	0	0.0175	0	0	0	0.0178	0	0	0	0	0	0	0	0	0	0	0.0175	0	0	0	0	0	0	0	0.0184	0	0	0	0	0	0	0	0	0.018	0	0	0	0	0	0	0
[ 427] #CNBRK344-14|KR246182|BIOUG10674-F08|Ctenosciara_hyalipennis|COI-5P	CNBRK344-14	ENEA	0.0017	0.0017	0.0017	0	0	0	0	0.0174	0	0	0	0.0178	0	0	0	0	0	0	0	0	0	0	0.0175	0	0	0	0	0	0	0	0.0184	0	0	0	0	0	0	0	0	0.018	0	0	0	0	0	0	0
[ 428] #CNBRK345-14|KR253356|BIOUG10674-F09|Ctenosciara_hyalipennis|COI-5P	CNBRK345-14	ENEA	0.0017	0.0017	0.0017	0	0	0	0	0.0177	0	0	0	0.0177	0	0	0	0	0	0	0	0	0	0	0.0179	0	0	0	0	0	0	0	0.0185	0	0	0	0	0	0	0	0	0.0177	0	0	0	0	0	0	0
[ 429] #CNBRK346-14|KR247230|BIOUG10674-F10|Ctenosciara_hyalipennis|COI-5P	CNBRK346-14	ENEA	0.0017	0.0017	0.0017	0	0	0	0	0.0172	0	0	0	0.0175	0	0	0	0	0	0	0	0	0	0	0.0175	0	0	0	0	0	0	0	0.0184	0	0	0	0	0	0	0	0	0.0177	0	0	0	0	0	0	0
[ 430] #CNBRK347-14|KR242594|BIOUG10674-F11|Ctenosciara_hyalipennis|COI-5P	CNBRK347-14	ENEA	0.0017	0.0017	0.0017	0	0	0	0	0.0172	0	0	0	0.0175	0	0	0	0	0	0	0	0	0	0	0.0175	0	0	0	0	0	0	0	0.0184	0	0	0	0	0	0	0	0	0.0177	0	0	0	0	0	0	0
[ 431] #CNBRK348-14|KR234335|BIOUG10674-F12|Ctenosciara_hyalipennis|COI-5P	CNBRK348-14	ENEA	0.0017	0.0017	0.0017	0	0	0	0	0.0172	0	0	0	0.0175	0	0	0	0	0	0	0	0	0	0	0.0175	0	0	0	0	0	0	0	0.0184	0	0	0	0	0	0	0	0	0.0177	0	0	0	0	0	0	0
[ 432] #CNBRK349-14|KR247564|BIOUG10674-G01|Ctenosciara_hyalipennis|COI-5P	CNBRK349-14	ENEA	0.0016	0.0016	0.0016	0	0	0	0	0.0172	0	0	0	0.0175	0	0	0	0	0	0	0	0	0	0	0.0175	0	0	0	0	0	0	0	0.0184	0	0	0	0	0	0	0	0	0.0177	0	0	0	0	0	0	0
[ 433] #CNBRK351-14|KR249407|BIOUG10674-G03|Ctenosciara_hyalipennis|COI-5P	CNBRK351-14	ENEA	0.0016	0.0016	0.0016	0	0	0	0	0.0172	0	0	0	0.0175	0	0	0	0	0	0	0	0	0	0	0.0175	0	0	0	0	0	0	0	0.0184	0	0	0	0	0	0	0	0	0.0177	0	0	0	0	0	0	0
[ 434] #CNBRK358-14|KR236650|BIOUG10674-G10|Ctenosciara_hyalipennis|COI-5P	CNBRK358-14	ENEA	0.0017	0.0017	0.0017	0	0	0	0	0.0177	0	0	0	0.0177	0	0	0	0	0	0	0	0	0	0	0.0179	0	0	0	0	0	0	0	0.0185	0	0	0	0	0	0	0	0	0.0177	0	0	0	0	0	0	0
[ 435] #CNBRK360-14|KR237948|BIOUG10674-G12|Ctenosciara_hyalipennis|COI-5P	CNBRK360-14	ENEA	0.019	0.019	0.019	0.0175	0.018	0.0172	0.0176	0	0.0172	0.0172	0.0175	0	0.0186	0.0175	0.0179	0.0172	0.0179	0.0182	0.0172	0.0176	0.0175	0.0175	0	0.0172	0.0172	0.0172	0.0172	0.0175	0.0184	0.0172	0	0.0172	0.0182	0.0172	0.0172	0.0175	0.0175	0.0176	0.0175	0	0.0182	0.0177	0.018	0.018	0.0182	0.0172	0.0175
[ 436] #CNBRK362-14|KR244030|BIOUG10674-H02|Ctenosciara_hyalipennis|COI-5P	CNBRK362-14	ENEA	0.0017	0.0017	0.0017	0	0	0	0	0.0173	0	0	0	0.0175	0	0	0	0	0	0	0	0	0	0	0.0175	0	0	0	0	0	0	0	0.0184	0	0	0	0	0	0	0	0	0.0177	0	0	0	0	0	0	0
[ 437] #CNBRK363-14|KR242640|BIOUG10674-H03|Ctenosciara_hyalipennis|COI-5P	CNBRK363-14	ENEA	0.0017	0.0017	0.0017	0	0	0	0	0.0173	0	0	0	0.0175	0	0	0	0	0	0	0	0	0	0	0.0175	0	0	0	0	0	0	0	0.0184	0	0	0	0	0	0	0	0	0.0177	0	0	0	0	0	0	0
[ 438] #CNBRK364-14|KR238755|BIOUG10674-H04|Ctenosciara_hyalipennis|COI-5P	CNBRK364-14	ENEA	0.0017	0.0017	0.0017	0	0	0	0	0.0175	0	0	0	0.0175	0	0	0	0	0	0	0	0	0	0	0.0178	0	0	0	0	0	0	0	0.0184	0	0	0	0	0	0	0	0	0.0177	0	0	0	0	0	0	0
[ 439] #CNBRK368-14|KR249165|BIOUG10674-H08|Ctenosciara_hyalipennis|COI-5P	CNBRK368-14	ENEA	0.0018	0.0018	0.0018	0	0	0	0	0.0183	0	0	0	0.0183	0	0	0	0	0	0	0	0	0	0	0.0186	0	0	0	0	0	0	0	0.0192	0	0	0	0	0	0	0	0	0.0183	0	0	0	0	0	0	0
[ 440] #CNBRK383-14|KR255575|BIOUG10687-A02|Ctenosciara_hyalipennis|COI-5P	CNBRK383-14	ENEA	0.0017	0.0017	0.0017	0	0	0	0	0.0177	0	0	0	0.0177	0	0	0	0	0	0	0	0	0	0	0.0179	0	0	0	0	0	0	0	0.0185	0	0	0	0	0	0	0	0	0.0177	0	0	0	0	0	0	0
[ 441] #CNBRK384-14|KR255895|BIOUG10687-A03|Ctenosciara_hyalipennis|COI-5P	CNBRK384-14	ENEA	0.0017	0.0017	0.0017	0	0	0	0	0.0177	0	0	0	0.0177	0	0	0	0	0	0	0	0	0	0	0.0179	0	0	0	0	0	0	0	0.0185	0	0	0	0	0	0	0	0	0.0177	0	0	0	0	0	0	0
[ 442] #CNBRK385-14|KR240101|BIOUG10687-A04|Ctenosciara_hyalipennis|COI-5P	CNBRK385-14	ENEA	0.0017	0.0017	0.0017	0	0	0	0	0.0177	0	0	0	0.0177	0	0	0	0	0	0	0	0	0	0	0.0179	0	0	0	0	0	0	0	0.0185	0	0	0	0	0	0	0	0	0.0177	0	0	0	0	0	0	0
[ 443] #CNBRK387-14|KR242199|BIOUG10687-A06|Ctenosciara_hyalipennis|COI-5P	CNBRK387-14	ENEA	0.0019	0.0019	0.0019	0	0	0	0	0.0174	0	0	0	0.0174	0	0	0	0	0	0	0	0	0	0	0.0174	0	0	0	0	0	0	0	0.018	0	0	0	0	0	0	0	0	0.0174	0	0	0	0	0	0	0
[ 444] #CNBRK388-14|KR243265|BIOUG10687-A07|Ctenosciara_hyalipennis|COI-5P	CNBRK388-14	ENEA	0.0018	0.0018	0.0018	0	0	0	0	0.0183	0	0	0	0.0183	0	0	0	0	0	0	0	0	0	0	0.0186	0	0	0	0	0	0	0	0.0192	0	0	0	0	0	0	0	0	0.0183	0	0	0	0	0	0	0
[ 445] #CNBRK389-14|KR255995|BIOUG10687-A08|Ctenosciara_hyalipennis|COI-5P	CNBRK389-14	ENEA	0.0017	0.0017	0.0017	0	0	0	0	0.0177	0	0	0	0.0177	0	0	0	0	0	0	0	0	0	0	0.0179	0	0	0	0	0	0	0	0.0185	0	0	0	0	0	0	0	0	0.0177	0	0	0	0	0	0	0
[ 446] #CNBRK390-14|KR234463|BIOUG10687-A09|Ctenosciara_hyalipennis|COI-5P	CNBRK390-14	ENEA	0.0017	0.0017	0.0017	0	0	0	0	0.0176	0	0	0	0.0176	0	0	0	0	0	0	0	0	0	0	0.0179	0	0	0	0	0	0	0	0.0184	0	0	0	0	0	0	0	0	0.0177	0	0	0	0	0	0	0
[ 447] #CNBRK392-14|KR255370|BIOUG10687-A11|Ctenosciara_hyalipennis|COI-5P	CNBRK392-14	ENEA	0.0017	0.0017	0.0017	0	0	0	0	0.0177	0	0	0	0.0177	0	0	0	0	0	0	0	0	0	0	0.0179	0	0	0	0	0	0	0	0.0185	0	0	0	0	0	0	0	0	0.0177	0	0	0	0	0	0	0
[ 448] #CNBRK395-14|KR254977|BIOUG10687-B02|Ctenosciara_hyalipennis|COI-5P	CNBRK395-14	ENEA	0.0017	0.0017	0.0017	0	0	0	0	0.0172	0	0	0	0.0175	0	0	0	0	0	0	0	0	0	0	0.0175	0	0	0	0	0	0	0	0.0184	0	0	0	0	0	0	0	0	0.0177	0	0	0	0	0	0	0
[ 449] #CNBRK396-14|KR254809|BIOUG10687-B03|Ctenosciara_hyalipennis|COI-5P	CNBRK396-14	ENEA	0.0017	0.0017	0.0017	0	0	0	0	0.0177	0	0	0	0.0177	0	0	0	0	0	0	0	0	0	0	0.0179	0	0	0	0	0	0	0	0.0185	0	0	0	0	0	0	0	0	0.0177	0	0	0	0	0	0	0
[ 450] #CNBRK397-14|KR246517|BIOUG10687-B04|Ctenosciara_hyalipennis|COI-5P	CNBRK397-14	ENEA	0.0018	0.0018	0.0018	0	0	0	0	0.0181	0	0	0	0.0181	0	0	0	0	0	0	0	0	0	0	0.0184	0	0	0	0	0	0	0	0.0189	0	0	0	0	0	0	0	0	0.0181	0	0	0	0	0	0	0
[ 451] #CNBRK398-14|KR244790|BIOUG10687-B05|Ctenosciara_hyalipennis|COI-5P	CNBRK398-14	ENEA	0.0017	0.0017	0.0017	0	0	0	0	0.0176	0	0	0	0.0176	0	0	0	0	0	0	0	0	0	0	0.0179	0	0	0	0	0	0	0	0.0184	0	0	0	0	0	0	0	0	0.0177	0	0	0	0	0	0	0
[ 452] #CNBRK399-14|KR256075|BIOUG10687-B06|Ctenosciara_hyalipennis|COI-5P	CNBRK399-14	ENEA	0.0018	0.0018	0.0018	0	0	0	0	0.0181	0	0	0	0.0181	0	0	0	0	0	0	0	0	0	0	0.0184	0	0	0	0	0	0	0	0.0189	0	0	0	0	0	0	0	0	0.0181	0	0	0	0	0	0	0
[ 453] #CNBRK401-14|KR253756|BIOUG10687-B08|Ctenosciara_hyalipennis|COI-5P	CNBRK401-14	ENEA	0.0202	0.0202	0.0202	0.0186	0.0192	0.0183	0.0187	0	0.0183	0.0183	0.0186	0	0.0193	0.0186	0.0186	0.0183	0.0186	0.0193	0.0183	0.0183	0.0186	0.0186	0	0.0183	0.0183	0.0183	0.0183	0.0186	0.0192	0.0183	0	0.0183	0.0193	0.0183	0.0183	0.0183	0.0183	0.0187	0.0186	0	0.0193	0.0188	0.0186	0.0192	0.0193	0.0183	0.0186
[ 454] #CNBRK403-14|KR239398|BIOUG10687-B10|Ctenosciara_hyalipennis|COI-5P	CNBRK403-14	ENEA	0.0018	0.0018	0.0018	0	0	0	0	0.0179	0	0	0	0.0179	0	0	0	0	0	0	0	0	0	0	0.0179	0	0	0	0	0	0	0	0.0185	0	0	0	0	0	0	0	0	0.018	0	0	0	0	0	0	0
[ 455] #CNBRK404-14|KR245796|BIOUG10687-B11|Ctenosciara_hyalipennis|COI-5P	CNBRK404-14	ENEA	0.0018	0.0018	0.0018	0	0	0	0	0.0183	0	0	0	0.0183	0	0	0	0	0	0	0	0	0	0	0.0186	0	0	0	0	0	0	0	0.0192	0	0	0	0	0	0	0	0	0.0183	0	0	0	0	0	0	0
[ 456] #CNBRK405-14|KR255742|BIOUG10687-B12|Ctenosciara_hyalipennis|COI-5P	CNBRK405-14	ENEA	0.0017	0.0017	0.0017	0	0	0	0	0.0177	0	0	0	0.0177	0	0	0	0	0	0	0	0	0	0	0.0179	0	0	0	0	0	0	0	0.0185	0	0	0	0	0	0	0	0	0.0177	0	0	0	0	0	0	0
[ 457] #CNBRK406-14|KR245471|BIOUG10687-C01|Ctenosciara_hyalipennis|COI-5P	CNBRK406-14	ENEA	0	0	0	0.0017	0.0018	0.0017	0.0017	0.019	0.0017	0.0017	0.0017	0.0193	0.0018	0.0017	0.0018	0.0017	0.0018	0.0018	0.0017	0.0017	0.0017	0.0017	0.0193	0.0017	0.0017	0.0017	0.0017	0.0017	0.0018	0.0017	0.0202	0.0017	0.0018	0.0017	0.0017	0.0017	0.0017	0.0017	0.0017	0.0195	0.0018	0.0017	0.0018	0.0018	0.0018	0.0017	0.0017
[ 458] #CNBRK407-14|KR237082|BIOUG10687-C02|Ctenosciara_hyalipennis|COI-5P	CNBRK407-14	ENEA	0.0017	0.0017	0.0017	0	0	0	0	0.0177	0	0	0	0.0177	0	0	0	0	0	0	0	0	0	0	0.0179	0	0	0	0	0	0	0	0.0185	0	0	0	0	0	0	0	0	0.0177	0	0	0	0	0	0	0
[ 459] #CNBRK408-14|KR254437|BIOUG10687-C03|Ctenosciara_hyalipennis|COI-5P	CNBRK408-14	ENEA	0.0017	0.0017	0.0017	0	0	0	0	0.0176	0	0	0	0.0176	0	0	0	0	0	0	0	0	0	0	0.0179	0	0	0	0	0	0	0	0.0184	0	0	0	0	0	0	0	0	0.0177	0	0	0	0	0	0	0
[ 460] #CNBRK409-14|KR256469|BIOUG10687-C04|Ctenosciara_hyalipennis|COI-5P	CNBRK409-14	ENEA	0.0017	0.0017	0.0017	0	0	0	0	0.0177	0	0	0	0.0177	0	0	0	0	0	0	0	0	0	0	0.0179	0	0	0	0	0	0	0	0.0185	0	0	0	0	0	0	0	0	0.0177	0	0	0	0	0	0	0
[ 461] #CNBRK411-14|KR235236|BIOUG10687-C06|Ctenosciara_hyalipennis|COI-5P	CNBRK411-14	ENEA	0.0017	0.0017	0.0017	0	0	0	0	0.0177	0	0	0	0.0177	0	0	0	0	0	0	0	0	0	0	0.0179	0	0	0	0	0	0	0	0.0185	0	0	0	0	0	0	0	0	0.0177	0	0	0	0	0	0	0
[ 462] #CNBRK412-14|KR255740|BIOUG10687-C07|Ctenosciara_hyalipennis|COI-5P	CNBRK412-14	ENEA	0.0017	0.0017	0.0017	0	0	0	0	0.0172	0	0	0	0.0175	0	0	0	0	0	0	0	0	0	0	0.0175	0	0	0	0	0	0	0	0.0184	0	0	0	0	0	0	0	0	0.0177	0	0	0	0	0	0	0
[ 463] #CNBRK416-14|KR241240|BIOUG10687-C11|Ctenosciara_hyalipennis|COI-5P	CNBRK416-14	ENEA	0.0017	0.0017	0.0017	0	0	0	0	0.0177	0	0	0	0.0177	0	0	0	0	0	0	0	0	0	0	0.0179	0	0	0	0	0	0	0	0.0185	0	0	0	0	0	0	0	0	0.0177	0	0	0	0	0	0	0
[ 464] #CNBRK420-14|KR257050|BIOUG10687-D03|Ctenosciara_hyalipennis|COI-5P	CNBRK420-14	ENEA	0.0017	0.0017	0.0017	0	0	0	0	0.0177	0	0	0	0.0177	0	0	0	0	0	0	0	0	0	0	0.018	0	0	0	0	0	0	0	0.0185	0	0	0	0	0	0	0	0	0.0177	0	0	0	0	0	0	0
[ 465] #CNBRK421-14|KR238366|BIOUG10687-D04|Ctenosciara_hyalipennis|COI-5P	CNBRK421-14	ENEA	0.0017	0.0017	0.0017	0	0	0	0	0.0172	0	0	0	0.0175	0	0	0	0	0	0	0	0	0	0	0.0175	0	0	0	0	0	0	0	0.0184	0	0	0	0	0	0	0	0	0.0177	0	0	0	0	0	0	0
[ 466] #CNBRK429-14|KR235500|BIOUG10687-D12|Ctenosciara_hyalipennis|COI-5P	CNBRK429-14	ENEA	0.0017	0.0017	0.0017	0	0	0	0	0.0177	0	0	0	0.0177	0	0	0	0	0	0	0	0	0	0	0.0179	0	0	0	0	0	0	0	0.0185	0	0	0	0	0	0	0	0	0.0177	0	0	0	0	0	0	0
[ 467] #CNBRK434-14|KR242721|BIOUG10687-E05|Ctenosciara_hyalipennis|COI-5P	CNBRK434-14	ENEA	0.0017	0.0017	0.0017	0	0	0	0	0.0177	0	0	0	0.0177	0	0	0	0	0	0	0	0	0	0	0.0179	0	0	0	0	0	0	0	0.0185	0	0	0	0	0	0	0	0	0.0177	0	0	0	0	0	0	0
[ 468] #CNBRK435-14|KR246789|BIOUG10687-E06|Ctenosciara_hyalipennis|COI-5P	CNBRK435-14	ENEA	0.0017	0.0017	0.0017	0	0	0	0	0.0177	0	0	0	0.0177	0	0	0	0	0	0	0	0	0	0	0.0179	0	0	0	0	0	0	0	0.0185	0	0	0	0	0	0	0	0	0.0177	0	0	0	0	0	0	0
[ 469] #CNBRK436-14|KR241620|BIOUG10687-E07|Ctenosciara_hyalipennis|COI-5P	CNBRK436-14	ENEA	0.0017	0.0017	0.0017	0	0	0	0	0.0177	0	0	0	0.0177	0	0	0	0	0	0	0	0	0	0	0.0179	0	0	0	0	0	0	0	0.0185	0	0	0	0	0	0	0	0	0.0177	0	0	0	0	0	0	0
[ 470] #CNBRK437-14|KR236213|BIOUG10687-E08|Ctenosciara_hyalipennis|COI-5P	CNBRK437-14	ENEA	0.0017	0.0017	0.0017	0	0	0	0	0.0176	0	0	0	0.0176	0	0	0	0	0	0	0	0	0	0	0.0179	0	0	0	0	0	0	0	0.0184	0	0	0	0	0	0	0	0	0.0177	0	0	0	0	0	0	0
[ 471] #CNBRK438-14|KR251194|BIOUG10687-E09|Ctenosciara_hyalipennis|COI-5P	CNBRK438-14	ENEA	0.0018	0.0018	0.0018	0	0	0	0	0.0183	0	0	0	0.0183	0	0	0	0	0	0	0	0	0	0	0.0186	0	0	0	0	0	0	0	0.0192	0	0	0	0	0	0	0	0	0.0183	0	0	0	0	0	0	0
[ 472] #CNBRK439-14|KR247817|BIOUG10687-E10|Ctenosciara_hyalipennis|COI-5P	CNBRK439-14	ENEA	0.0017	0.0017	0.0017	0	0	0	0	0.0173	0	0	0	0.0175	0	0	0	0	0	0	0	0	0	0	0.0175	0	0	0	0	0	0	0	0.0184	0	0	0	0	0	0	0	0	0.0177	0	0	0	0	0	0	0
[ 473] #CNBRK440-14|KR239445|BIOUG10687-E11|Ctenosciara_hyalipennis|COI-5P	CNBRK440-14	ENEA	0.0018	0.0018	0.0018	0	0	0	0	0.0183	0	0	0	0.0183	0	0	0	0	0	0	0	0	0	0	0.0186	0	0	0	0	0	0	0	0.0192	0	0	0	0	0	0	0	0	0.0183	0	0	0	0	0	0	0
[ 474] #CNBRK442-14|KR245751|BIOUG10687-F01|Ctenosciara_hyalipennis|COI-5P	CNBRK442-14	ENEA	0.0017	0.0017	0.0017	0	0	0	0	0.0172	0	0	0	0.0175	0	0	0	0	0	0	0	0	0	0	0.0175	0	0	0	0	0	0	0	0.0184	0	0	0	0	0	0	0	0	0.0177	0	0	0	0	0	0	0
[ 475] #CNBRK445-14|KR257329|BIOUG10687-F04|Ctenosciara_hyalipennis|COI-5P	CNBRK445-14	ENEA	0.0017	0.0017	0.0017	0	0	0	0	0.0177	0	0	0	0.0177	0	0	0	0	0	0	0	0	0	0	0.018	0	0	0	0	0	0	0	0.0185	0	0	0	0	0	0	0	0	0.0177	0	0	0	0	0	0	0
[ 476] #CNBRK447-14|KR253503|BIOUG10687-F06|Ctenosciara_hyalipennis|COI-5P	CNBRK447-14	ENEA	0.0018	0.0018	0.0018	0	0	0	0	0.018	0	0	0	0.018	0	0	0	0	0	0	0	0	0	0	0.018	0	0	0	0	0	0	0	0.0185	0	0	0	0	0	0	0	0	0.018	0	0	0	0	0	0	0
[ 477] #CNBRL463-14|KR243040|BIOUG10693-A04|Ctenosciara_hyalipennis|COI-5P	CNBRL463-14	ENEA	0.0017	0.0017	0.0017	0	0	0	0	0.0172	0	0	0	0.0175	0	0	0	0	0	0	0	0	0	0	0.0175	0	0	0	0	0	0	0	0.0184	0	0	0	0	0	0	0	0	0.0177	0	0	0	0	0	0	0
[ 478] #CNBRL467-14|KR256754|BIOUG10693-A08|Ctenosciara_hyalipennis|COI-5P	CNBRL467-14	ENEA	0.0017	0.0017	0.0017	0	0	0	0	0.0175	0	0	0	0.018	0	0	0	0	0	0	0	0	0	0	0.0176	0	0	0	0	0	0	0	0.0184	0	0	0	0	0	0	0	0	0.0181	0	0	0	0	0	0	0
[ 479] #CNBRL470-14|KR258256|BIOUG10693-A11|Ctenosciara_hyalipennis|COI-5P	CNBRL470-14	ENEA	0.0017	0.0017	0.0017	0	0	0	0	0.0172	0	0	0	0.0175	0	0	0	0	0	0	0	0	0	0	0.0175	0	0	0	0	0	0	0	0.0184	0	0	0	0	0	0	0	0	0.0177	0	0	0	0	0	0	0
[ 480] #CNBRL472-14|KR241863|BIOUG10693-B01|Ctenosciara_hyalipennis|COI-5P	CNBRL472-14	ENEA	0.0016	0.0016	0.0016	0	0	0	0	0.0172	0	0	0	0.0175	0	0	0	0	0	0	0	0	0	0	0.0175	0	0	0	0	0	0	0	0.0184	0	0	0	0	0	0	0	0	0.0177	0	0	0	0	0	0	0
[ 481] #CNBRL479-14|KR257475|BIOUG10693-B08|Ctenosciara_hyalipennis|COI-5P	CNBRL479-14	ENEA	0.0017	0.0017	0.0017	0	0	0	0	0.0172	0	0	0	0.0175	0	0	0	0	0	0	0	0	0	0	0.0175	0	0	0	0	0	0	0	0.0184	0	0	0	0	0	0	0	0	0.0177	0	0	0	0	0	0	0
[ 482] #CNBRL481-14|KR256542|BIOUG10693-B10|Ctenosciara_hyalipennis|COI-5P	CNBRL481-14	ENEA	0.0017	0.0017	0.0017	0	0	0	0	0.0172	0	0	0	0.0175	0	0	0	0	0	0	0	0	0	0	0.0175	0	0	0	0	0	0	0	0.0184	0	0	0	0	0	0	0	0	0.0177	0	0	0	0	0	0	0
[ 483] #CNBRL482-14|KR248706|BIOUG10693-B11|Ctenosciara_hyalipennis|COI-5P	CNBRL482-14	ENEA	0.0017	0.0017	0.0017	0	0	0	0	0.0175	0	0	0	0.0175	0	0	0	0	0	0	0	0	0	0	0.0178	0	0	0	0	0	0	0	0.0184	0	0	0	0	0	0	0	0	0.0177	0	0	0	0	0	0	0
[ 484] #CNBRL485-14|KR239803|BIOUG10693-C02|Ctenosciara_hyalipennis|COI-5P	CNBRL485-14	ENEA	0.0189	0.0189	0.0189	0.0175	0.0179	0.0172	0.0176	0	0.0172	0.0172	0.0175	0	0.0186	0.0175	0.0179	0.0172	0.0179	0.0182	0.0172	0.0176	0.0175	0.0175	0	0.0172	0.0172	0.0172	0.0172	0.0175	0.0184	0.0172	0	0.0172	0.0182	0.0172	0.0172	0.0175	0.0175	0.0176	0.0175	0	0.0182	0.0177	0.018	0.0179	0.0182	0.0172	0.0175
[ 485] #CNBRL493-14|KR247087|BIOUG10693-C10|Ctenosciara_hyalipennis|COI-5P	CNBRL493-14	ENEA	0.0017	0.0017	0.0017	0	0	0	0	0.0172	0	0	0	0.0175	0	0	0	0	0	0	0	0	0	0	0.0175	0	0	0	0	0	0	0	0.0184	0	0	0	0	0	0	0	0	0.0177	0	0	0	0	0	0	0
[ 486] #CNBRL501-14|KR248369|BIOUG10693-D06|Ctenosciara_hyalipennis|COI-5P	CNBRL501-14	ENEA	0.0017	0.0017	0.0017	0	0	0	0	0.0177	0	0	0	0.0177	0	0	0	0	0	0	0	0	0	0	0.018	0	0	0	0	0	0	0	0.0185	0	0	0	0	0	0	0	0	0.0177	0	0	0	0	0	0	0
[ 487] #CNBRL510-14|KR248072|BIOUG10693-E03|Ctenosciara_hyalipennis|COI-5P	CNBRL510-14	ENEA	0.0189	0.0189	0.0189	0.0175	0.0179	0.0172	0.0176	0	0.0172	0.0172	0.0175	0	0.0186	0.0175	0.0179	0.0172	0.0179	0.0182	0.0172	0.0176	0.0175	0.0175	0	0.0172	0.0172	0.0172	0.0172	0.0175	0.0184	0.0172	0	0.0172	0.0182	0.0172	0.0172	0.0175	0.0175	0.0176	0.0175	0	0.0182	0.0177	0.018	0.0179	0.0182	0.0172	0.0175
[ 488] #CNBRL511-14|KR254950|BIOUG10693-E04|Ctenosciara_hyalipennis|COI-5P	CNBRL511-14	ENEA	0.0017	0.0017	0.0017	0	0	0	0	0.0172	0	0	0	0.0175	0	0	0	0	0	0	0	0	0	0	0.0175	0	0	0	0	0	0	0	0.0184	0	0	0	0	0	0	0	0	0.0177	0	0	0	0	0	0	0
[ 489] #CNBRL512-14|KR235081|BIOUG10693-E05|Ctenosciara_hyalipennis|COI-5P	CNBRL512-14	ENEA	0.0017	0.0017	0.0017	0	0	0	0	0.0172	0	0	0	0.0175	0	0	0	0	0	0	0	0	0	0	0.0175	0	0	0	0	0	0	0	0.0184	0	0	0	0	0	0	0	0	0.0177	0	0	0	0	0	0	0
[ 490] #CNBRL520-14|KR246384|BIOUG10693-F01|Ctenosciara_hyalipennis|COI-5P	CNBRL520-14	ENEA	0.0017	0.0017	0.0017	0	0	0	0	0.0172	0	0	0	0.0175	0	0	0	0	0	0	0	0	0	0	0.0175	0	0	0	0	0	0	0	0.0184	0	0	0	0	0	0	0	0	0.0177	0	0	0	0	0	0	0
[ 491] #CNBRL527-14|KR258419|BIOUG10693-F08|Ctenosciara_hyalipennis|COI-5P	CNBRL527-14	ENEA	0	0	0	0.0017	0.0018	0.0017	0.0017	0.0189	0.0017	0.0017	0.0017	0.0193	0.0018	0.0017	0.0018	0.0017	0.0018	0.0018	0.0017	0.0017	0.0017	0.0017	0.0193	0.0017	0.0017	0.0017	0.0017	0.0017	0.0018	0.0017	0.0202	0.0017	0.0018	0.0017	0.0017	0.0017	0.0017	0.0017	0.0017	0.0195	0.0018	0.0017	0.0018	0.0018	0.0018	0.0017	0.0017
[ 492] #CNBRL531-14|KR257607|BIOUG10693-F12|Ctenosciara_hyalipennis|COI-5P	CNBRL531-14	ENEA	0.0017	0.0017	0.0017	0	0	0	0	0.0177	0	0	0	0.0177	0	0	0	0	0	0	0	0	0	0	0.0179	0	0	0	0	0	0	0	0.0185	0	0	0	0	0	0	0	0	0.0177	0	0	0	0	0	0	0
[ 493] #CNBRL541-14|KR236358|BIOUG10693-G10|Ctenosciara_hyalipennis|COI-5P	CNBRL541-14	ENEA	0.0017	0.0017	0.0017	0	0	0	0	0.0175	0	0	0	0.0177	0	0	0	0	0	0	0	0	0	0	0.0175	0	0	0	0	0	0	0	0.0184	0	0	0	0	0	0	0	0	0.0179	0	0	0	0	0	0	0
[ 494] #CNBRL542-14|KR235910|BIOUG10693-G11|Ctenosciara_hyalipennis|COI-5P	CNBRL542-14	ENEA	0.0017	0.0017	0.0017	0	0	0	0	0.0172	0	0	0	0.0175	0	0	0	0	0	0	0	0	0	0	0.0175	0	0	0	0	0	0	0	0.0184	0	0	0	0	0	0	0	0	0.0177	0	0	0	0	0	0	0
[ 495] #CNBRL548-14|KR247300|BIOUG10693-H05|Ctenosciara_hyalipennis|COI-5P	CNBRL548-14	ENEA	0.0017	0.0017	0.0017	0	0	0	0	0.0172	0	0	0	0.0175	0	0	0	0	0	0	0	0	0	0	0.0175	0	0	0	0	0	0	0	0.0184	0	0	0	0	0	0	0	0	0.0177	0	0	0	0	0	0	0
[ 496] #CNBRL549-14|KR246663|BIOUG10693-H06|Ctenosciara_hyalipennis|COI-5P	CNBRL549-14	ENEA	0.0017	0.0017	0.0017	0	0	0	0	0.0172	0	0	0	0.0175	0	0	0	0	0	0	0	0	0	0	0.0175	0	0	0	0	0	0	0	0.0184	0	0	0	0	0	0	0	0	0.0177	0	0	0	0	0	0	0
[ 497] #CNBRL551-14|KR251895|BIOUG10693-H08|Ctenosciara_hyalipennis|COI-5P	CNBRL551-14	ENEA	0.0017	0.0017	0.0017	0	0	0	0	0.0172	0	0	0	0.0175	0	0	0	0	0	0	0	0	0	0	0.0175	0	0	0	0	0	0	0	0.0184	0	0	0	0	0	0	0	0	0.0177	0	0	0	0	0	0	0
[ 498] #CNBRL558-14|KR256133|BIOUG10694-A04|Ctenosciara_hyalipennis|COI-5P	CNBRL558-14	ENEA	0	0	0	0.0017	0.0018	0.0017	0.0017	0.0189	0.0017	0.0017	0.0017	0.0193	0.0018	0.0017	0.0018	0.0017	0.0018	0.0018	0.0017	0.0017	0.0017	0.0017	0.0193	0.0017	0.0017	0.0017	0.0017	0.0017	0.0018	0.0017	0.0202	0.0017	0.0018	0.0017	0.0017	0.0017	0.0017	0.0017	0.0017	0.0195	0.0018	0.0017	0.0018	0.0018	0.0018	0.0017	0.0017
[ 499] #CNBRL559-14|KR252619|BIOUG10694-A05|Ctenosciara_hyalipennis|COI-5P	CNBRL559-14	ENEA	0.0017	0.0017	0.0017	0	0	0	0	0.0172	0	0	0	0.0175	0	0	0	0	0	0	0	0	0	0	0.0175	0	0	0	0	0	0	0	0.0184	0	0	0	0	0	0	0	0	0.0177	0	0	0	0	0	0	0
[ 500] #CNBRL567-14|KR240752|BIOUG10694-B01|Ctenosciara_hyalipennis|COI-5P	CNBRL567-14	ENEA	0.0017	0.0017	0.0017	0	0	0	0	0.0173	0	0	0	0.0176	0	0	0	0	0	0	0	0	0	0	0.0175	0	0	0	0	0	0	0	0.0184	0	0	0	0	0	0	0	0	0.0177	0	0	0	0	0	0	0
[ 501] #CNBRL568-14|KR236310|BIOUG10694-B02|Ctenosciara_hyalipennis|COI-5P	CNBRL568-14	ENEA	0.0017	0.0017	0.0017	0	0	0	0	0.0172	0	0	0	0.0175	0	0	0	0	0	0	0	0	0	0	0.0175	0	0	0	0	0	0	0	0.0184	0	0	0	0	0	0	0	0	0.0177	0	0	0	0	0	0	0
[ 502] #CNBRL573-14|KR249850|BIOUG10694-B07|Ctenosciara_hyalipennis|COI-5P	CNBRL573-14	ENEA	0.0017	0.0017	0.0017	0	0	0	0	0.0172	0	0	0	0.0175	0	0	0	0	0	0	0	0	0	0	0.0175	0	0	0	0	0	0	0	0.0184	0	0	0	0	0	0	0	0	0.0177	0	0	0	0	0	0	0
[ 503] #CNBRL576-14|KR237042|BIOUG10694-B10|Ctenosciara_hyalipennis|COI-5P	CNBRL576-14	ENEA	0.0017	0.0017	0.0017	0	0	0	0	0.0172	0	0	0	0.0175	0	0	0	0	0	0	0	0	0	0	0.0175	0	0	0	0	0	0	0	0.0184	0	0	0	0	0	0	0	0	0.0177	0	0	0	0	0	0	0
[ 504] #CNBRL583-14|KR244649|BIOUG10694-C05|Ctenosciara_hyalipennis|COI-5P	CNBRL583-14	ENEA	0.0017	0.0017	0.0017	0	0	0	0	0.0172	0	0	0	0.0175	0	0	0	0	0	0	0	0	0	0	0.0175	0	0	0	0	0	0	0	0.0184	0	0	0	0	0	0	0	0	0.0177	0	0	0	0	0	0	0
[ 505] #CNBRL587-14|KR258484|BIOUG10694-C09|Ctenosciara_hyalipennis|COI-5P	CNBRL587-14	ENEA	0.0017	0.0017	0.0017	0	0	0	0	0.0172	0	0	0	0.0175	0	0	0	0	0	0	0	0	0	0	0.0175	0	0	0	0	0	0	0	0.0184	0	0	0	0	0	0	0	0	0.0177	0	0	0	0	0	0	0
[ 506] #CNBRL588-14|KR254293|BIOUG10694-C10|Ctenosciara_hyalipennis|COI-5P	CNBRL588-14	ENEA	0.0017	0.0017	0.0017	0	0	0	0	0.0172	0	0	0	0.0175	0	0	0	0	0	0	0	0	0	0	0.0175	0	0	0	0	0	0	0	0.0184	0	0	0	0	0	0	0	0	0.0177	0	0	0	0	0	0	0
[ 507] #CNBRL590-14|KR243825|BIOUG10694-C12|Ctenosciara_hyalipennis|COI-5P	CNBRL590-14	ENEA	0.0017	0.0017	0.0017	0	0	0	0	0.0175	0	0	0	0.0178	0	0	0	0	0	0	0	0	0	0	0.0175	0	0	0	0	0	0	0	0.0184	0	0	0	0	0	0	0	0	0.018	0	0	0	0	0	0	0
[ 508] #CNBRL598-14|KR254426|BIOUG10694-D08|Ctenosciara_hyalipennis|COI-5P	CNBRL598-14	ENEA	0.0017	0.0017	0.0017	0	0	0	0	0.0172	0	0	0	0.0175	0	0	0	0	0	0	0	0	0	0	0.0175	0	0	0	0	0	0	0	0.0184	0	0	0	0	0	0	0	0	0.0177	0	0	0	0	0	0	0
[ 509] #CNBRL599-14|KR257011|BIOUG10694-D09|Ctenosciara_hyalipennis|COI-5P	CNBRL599-14	ENEA	0.0017	0.0017	0.0017	0	0	0	0	0.0174	0	0	0	0.0175	0	0	0	0	0	0	0	0	0	0	0.0177	0	0	0	0	0	0	0	0.0184	0	0	0	0	0	0	0	0	0.0177	0	0	0	0	0	0	0
[ 510] #CNBRL603-14|KR254677|BIOUG10694-E01|Ctenosciara_hyalipennis|COI-5P	CNBRL603-14	ENEA	0.0017	0.0017	0.0017	0	0	0	0	0.0172	0	0	0	0.0175	0	0	0	0	0	0	0	0	0	0	0.0175	0	0	0	0	0	0	0	0.0184	0	0	0	0	0	0	0	0	0.0177	0	0	0	0	0	0	0
[ 511] #CNBRL605-14|KR255118|BIOUG10694-E03|Ctenosciara_hyalipennis|COI-5P	CNBRL605-14	ENEA	0.0017	0.0017	0.0017	0	0	0	0	0.0172	0	0	0	0.0175	0	0	0	0	0	0	0	0	0	0	0.0175	0	0	0	0	0	0	0	0.0184	0	0	0	0	0	0	0	0	0.0177	0	0	0	0	0	0	0
[ 512] #CNBRL609-14|KR246509|BIOUG10694-E07|Ctenosciara_hyalipennis|COI-5P	CNBRL609-14	ENEA	0.0017	0.0017	0.0017	0	0	0	0	0.0172	0	0	0	0.0175	0	0	0	0	0	0	0	0	0	0	0.0175	0	0	0	0	0	0	0	0.0184	0	0	0	0	0	0	0	0	0.0177	0	0	0	0	0	0	0
[ 513] #CNBRL620-14|KR249243|BIOUG10694-F06|Ctenosciara_hyalipennis|COI-5P	CNBRL620-14	ENEA	0.0017	0.0017	0.0017	0	0	0	0	0.0172	0	0	0	0.0175	0	0	0	0	0	0	0	0	0	0	0.0175	0	0	0	0	0	0	0	0.0184	0	0	0	0	0	0	0	0	0.0177	0	0	0	0	0	0	0
[ 514] #CNBRL625-14|KR247613|BIOUG10694-F11|Ctenosciara_hyalipennis|COI-5P	CNBRL625-14	ENEA	0.0017	0.0017	0.0017	0	0	0	0	0.0175	0	0	0	0.0175	0	0	0	0	0	0	0	0	0	0	0.0178	0	0	0	0	0	0	0	0.0184	0	0	0	0	0	0	0	0	0.0177	0	0	0	0	0	0	0
[ 515] #CNBRL636-14|KR252255|BIOUG10694-G10|Ctenosciara_hyalipennis|COI-5P	CNBRL636-14	ENEA	0.0017	0.0017	0.0017	0	0	0	0	0.0172	0	0	0	0.0175	0	0	0	0	0	0	0	0	0	0	0.0175	0	0	0	0	0	0	0	0.0184	0	0	0	0	0	0	0	0	0.0177	0	0	0	0	0	0	0
[ 516] #CNBRL637-14|KR257307|BIOUG10694-G11|Ctenosciara_hyalipennis|COI-5P	CNBRL637-14	ENEA	0.0017	0.0017	0.0017	0	0	0	0	0.0172	0	0	0	0.0175	0	0	0	0	0	0	0	0	0	0	0.0175	0	0	0	0	0	0	0	0.0184	0	0	0	0	0	0	0	0	0.0177	0	0	0	0	0	0	0
[ 517] #CNBRL655-14|KR256341|BIOUG10695-A06|Ctenosciara_hyalipennis|COI-5P	CNBRL655-14	ENEA	0.0017	0.0017	0.0017	0	0	0	0	0.0172	0	0	0	0.0175	0	0	0	0	0	0	0	0	0	0	0.0175	0	0	0	0	0	0	0	0.0184	0	0	0	0	0	0	0	0	0.0177	0	0	0	0	0	0	0
[ 518] #CNBRL658-14|KR258485|BIOUG10695-A09|Ctenosciara_hyalipennis|COI-5P	CNBRL658-14	ENEA	0.0017	0.0017	0.0017	0	0	0	0	0.0176	0	0	0	0.0176	0	0	0	0	0	0	0	0	0	0	0.0179	0	0	0	0	0	0	0	0.0185	0	0	0	0	0	0	0	0	0.0177	0	0	0	0	0	0	0
[ 519] #CNBRL659-14|KR243532|BIOUG10695-A10|Ctenosciara_hyalipennis|COI-5P	CNBRL659-14	ENEA	0.0017	0.0017	0.0017	0	0	0	0	0.0172	0	0	0	0.0175	0	0	0	0	0	0	0	0	0	0	0.0175	0	0	0	0	0	0	0	0.0184	0	0	0	0	0	0	0	0	0.0177	0	0	0	0	0	0	0
[ 520] #CNBRM378-14|KR257626|BIOUG10815-F06|Ctenosciara_hyalipennis|COI-5P	CNBRM378-14	ENEA	0.0017	0.0017	0.0017	0	0	0	0	0.0177	0	0	0	0.0177	0	0	0	0	0	0	0	0	0	0	0.018	0	0	0	0	0	0	0	0.0185	0	0	0	0	0	0	0	0	0.0177	0	0	0	0	0	0	0
[ 521] #CNBRM391-14|KR245875|BIOUG10815-G07|Ctenosciara_hyalipennis|COI-5P	CNBRM391-14	ENEA	0.0017	0.0017	0.0017	0	0	0	0	0.0174	0	0	0	0.0178	0	0	0	0	0	0	0	0	0	0	0.0175	0	0	0	0	0	0	0	0.0184	0	0	0	0	0	0	0	0	0.018	0	0	0	0	0	0	0
[ 522] #CNBRM457-14|KR256445|BIOUG10816-E02|Ctenosciara_hyalipennis|COI-5P	CNBRM457-14	ENEA	0.0018	0.0018	0.0018	0	0	0	0	0.018	0	0	0	0.018	0	0	0	0	0	0	0	0	0	0	0.018	0	0	0	0	0	0	0	0.0185	0	0	0	0	0	0	0	0	0.018	0	0	0	0	0	0	0
[ 523] #CNBRM478-14|KR252767|BIOUG10816-F11|Ctenosciara_hyalipennis|COI-5P	CNBRM478-14	ENEA	0.0017	0.0017	0.0017	0	0	0	0	0.0172	0	0	0	0.0175	0	0	0	0	0	0	0	0	0	0	0.0175	0	0	0	0	0	0	0	0.0184	0	0	0	0	0	0	0	0	0.0177	0	0	0	0	0	0	0
[ 524] #CNBRM484-14|KR254771|BIOUG10816-G05|Ctenosciara_hyalipennis|COI-5P	CNBRM484-14	ENEA	0.0017	0.0017	0.0017	0	0	0	0	0.0177	0	0	0	0.0177	0	0	0	0	0	0	0	0	0	0	0.018	0	0	0	0	0	0	0	0.0185	0	0	0	0	0	0	0	0	0.0177	0	0	0	0	0	0	0
[ 525] #CNBRN116-14|KR978021|BIOUG10842-A04|Ctenosciara_hyalipennis|COI-5P	CNBRN116-14	ENEA	0.0019	0.0019	0.0019	0	0	0	0	0.0178	0	0	0	0.0178	0	0	0	0	0	0	0	0	0	0	0.018	0	0	0	0	0	0	0	0.0187	0	0	0	0	0	0	0	0	0.0178	0	0	0	0	0	0	0
[ 526] #CNBRN120-14|KR246980|BIOUG10842-A08|Ctenosciara_hyalipennis|COI-5P	CNBRN120-14	ENEA	0.0019	0.0019	0.0019	0	0	0	0	0.0176	0	0	0	0.0176	0	0	0	0	0	0	0	0	0	0	0.0176	0	0	0	0	0	0	0	0.0176	0	0	0	0	0	0	0	0	0.0176	0	0	0	0	0	0	0
[ 527] #CNBRN122-14|KR256364|BIOUG10842-A10|Ctenosciara_hyalipennis|COI-5P	CNBRN122-14	ENEA	0.0018	0.0018	0.0018	0	0	0	0	0.0181	0	0	0	0.0181	0	0	0	0	0	0	0	0	0	0	0.0184	0	0	0	0	0	0	0	0.0189	0	0	0	0	0	0	0	0	0.0181	0	0	0	0	0	0	0
[ 528] #CNBRN1224-14|KR248279|BIOUG10974-B05|Ctenosciara_hyalipennis|COI-5P	CNBRN1224-14	ENEA	0.0017	0.0017	0.0017	0	0	0	0	0.0172	0	0	0	0.0175	0	0	0	0	0	0	0	0	0	0	0.0175	0	0	0	0	0	0	0	0.0184	0	0	0	0	0	0	0	0	0.0177	0	0	0	0	0	0	0
[ 529] #CNBRN125-14|KR252042|BIOUG10842-B01|Ctenosciara_hyalipennis|COI-5P	CNBRN125-14	ENEA	0.0018	0.0018	0.0018	0	0	0	0	0.0179	0	0	0	0.0179	0	0	0	0	0	0	0	0	0	0	0.0179	0	0	0	0	0	0	0	0.0185	0	0	0	0	0	0	0	0	0.018	0	0	0	0	0	0	0
[ 530] #CNBRN135-14|KR249038|BIOUG10842-B11|Ctenosciara_hyalipennis|COI-5P	CNBRN135-14	ENEA	0.0017	0.0017	0.0017	0	0	0	0	0.0176	0	0	0	0.0176	0	0	0	0	0	0	0	0	0	0	0.0179	0	0	0	0	0	0	0	0.0184	0	0	0	0	0	0	0	0	0.0177	0	0	0	0	0	0	0
[ 531] #CNBRN138-14|KR238468|BIOUG10842-C02|Ctenosciara_hyalipennis|COI-5P	CNBRN138-14	ENEA	0.0017	0.0017	0.0017	0	0	0	0	0.0172	0	0	0	0.0175	0	0	0	0	0	0	0	0	0	0	0.0175	0	0	0	0	0	0	0	0.0184	0	0	0	0	0	0	0	0	0.0177	0	0	0	0	0	0	0
[ 532] #CNBRN142-14|KR235737|BIOUG10842-C06|Ctenosciara_hyalipennis|COI-5P	CNBRN142-14	ENEA	0.0019	0.0019	0.0019	0	0	0	0	0.0169	0	0	0	0.0169	0	0	0	0	0	0	0	0	0	0	0.0169	0	0	0	0	0	0	0	0.0175	0	0	0	0	0	0	0	0	0.0169	0	0	0	0	0	0	0
[ 533] #CNBRN144-14|KR256953|BIOUG10842-C08|Ctenosciara_hyalipennis|COI-5P	CNBRN144-14	ENEA	0.0017	0.0017	0.0017	0	0	0	0	0.0176	0	0	0	0.0176	0	0	0	0	0	0	0	0	0	0	0.0179	0	0	0	0	0	0	0	0.0185	0	0	0	0	0	0	0	0	0.0177	0	0	0	0	0	0	0
[ 534] #CNBRN145-14|KR255708|BIOUG10842-C09|Ctenosciara_hyalipennis|COI-5P	CNBRN145-14	ENEA	0.0016	0.0016	0.0016	0	0	0	0	0.0172	0	0	0	0.0175	0	0	0	0	0	0	0	0	0	0	0.0175	0	0	0	0	0	0	0	0.0184	0	0	0	0	0	0	0	0	0.0177	0	0	0	0	0	0	0
[ 535] #CNBRN146-14|KR235931|BIOUG10842-C10|Ctenosciara_hyalipennis|COI-5P	CNBRN146-14	ENEA	0.0018	0.0018	0.0018	0	0	0	0	0.0178	0	0	0	0.0178	0	0	0	0	0	0	0	0	0	0	0.0178	0	0	0	0	0	0	0	0.0184	0	0	0	0	0	0	0	0	0.018	0	0	0	0	0	0	0
[ 536] #CNBRN149-14|KR255093|BIOUG10842-D01|Ctenosciara_hyalipennis|COI-5P	CNBRN149-14	ENEA	0.0017	0.0017	0.0017	0	0	0	0	0.0172	0	0	0	0.0175	0	0	0	0	0	0	0	0	0	0	0.0175	0	0	0	0	0	0	0	0.0184	0	0	0	0	0	0	0	0	0.0177	0	0	0	0	0	0	0
[ 537] #CNBRN157-14|KR251844|BIOUG10842-D09|Ctenosciara_hyalipennis|COI-5P	CNBRN157-14	ENEA	0.0018	0.0018	0.0018	0	0	0	0	0.0181	0	0	0	0.0181	0	0	0	0	0	0	0	0	0	0	0.0181	0	0	0	0	0	0	0	0.0185	0	0	0	0	0	0	0	0	0.0182	0	0	0	0	0	0	0
[ 538] #CNBRN162-14|KR238919|BIOUG10842-E02|Ctenosciara_hyalipennis|COI-5P	CNBRN162-14	ENEA	0.0018	0.0018	0.0018	0	0	0	0	0.0179	0	0	0	0.0179	0	0	0	0	0	0	0	0	0	0	0.0179	0	0	0	0	0	0	0	0.0185	0	0	0	0	0	0	0	0	0.018	0	0	0	0	0	0	0
[ 539] #CNBRN163-14|KR249690|BIOUG10842-E03|Ctenosciara_hyalipennis|COI-5P	CNBRN163-14	ENEA	0.0019	0.0019	0.0019	0	0	0	0	0.0176	0	0	0	0.0176	0	0	0	0	0	0	0	0	0	0	0.0176	0	0	0	0	0	0	0	0.018	0	0	0	0	0	0	0	0	0.0176	0	0	0	0	0	0	0
[ 540] #CNBRN165-14|KR245304|BIOUG10842-E05|Ctenosciara_hyalipennis|COI-5P	CNBRN165-14	ENEA	0.0017	0.0017	0.0017	0	0	0	0	0.0175	0	0	0	0.0178	0	0	0	0	0	0	0	0	0	0	0.0175	0	0	0	0	0	0	0	0.0184	0	0	0	0	0	0	0	0	0.018	0	0	0	0	0	0	0
[ 541] #CNBRN166-14|KR251039|BIOUG10842-E06|Ctenosciara_hyalipennis|COI-5P	CNBRN166-14	ENEA	0.0018	0.0018	0.0018	0	0	0	0	0.0179	0	0	0	0.0179	0	0	0	0	0	0	0	0	0	0	0.0179	0	0	0	0	0	0	0	0.0185	0	0	0	0	0	0	0	0	0.018	0	0	0	0	0	0	0
[ 542] #CNBRN167-14|KR234559|BIOUG10842-E07|Ctenosciara_hyalipennis|COI-5P	CNBRN167-14	ENEA	0.0018	0.0018	0.0018	0	0	0	0	0.0166	0	0	0	0.0166	0	0	0	0	0	0	0	0	0	0	0.0169	0	0	0	0	0	0	0	0.0174	0	0	0	0	0	0	0	0	0.0166	0	0	0	0	0	0	0
[ 543] #CNBRN168-14|KR245783|BIOUG10842-E08|Ctenosciara_hyalipennis|COI-5P	CNBRN168-14	ENEA	0.0017	0.0017	0.0017	0	0	0	0	0.0172	0	0	0	0.0175	0	0	0	0	0	0	0	0	0	0	0.0175	0	0	0	0	0	0	0	0.0184	0	0	0	0	0	0	0	0	0.0177	0	0	0	0	0	0	0
[ 544] #CNBRN170-14|KR234719|BIOUG10842-E10|Ctenosciara_hyalipennis|COI-5P	CNBRN170-14	ENEA	0.0017	0.0017	0.0017	0	0	0	0	0.0172	0	0	0	0.0175	0	0	0	0	0	0	0	0	0	0	0.0175	0	0	0	0	0	0	0	0.0184	0	0	0	0	0	0	0	0	0.0177	0	0	0	0	0	0	0
[ 545] #CNBRN172-14|KR256104|BIOUG10842-E12|Ctenosciara_hyalipennis|COI-5P	CNBRN172-14	ENEA	0.0017	0.0017	0.0017	0	0	0	0	0.0177	0	0	0	0.0177	0	0	0	0	0	0	0	0	0	0	0.018	0	0	0	0	0	0	0	0.0185	0	0	0	0	0	0	0	0	0.0177	0	0	0	0	0	0	0
[ 546] #CNBRN174-14|KR247488|BIOUG10842-F02|Ctenosciara_hyalipennis|COI-5P	CNBRN174-14	ENEA	0.0018	0.0018	0.0018	0	0	0	0	0.0181	0	0	0	0.0181	0	0	0	0	0	0	0	0	0	0	0.0181	0	0	0	0	0	0	0	0.0185	0	0	0	0	0	0	0	0	0.0181	0	0	0	0	0	0	0
[ 547] #CNBRN180-14|KR250244|BIOUG10842-F08|Ctenosciara_hyalipennis|COI-5P	CNBRN180-14	ENEA	0.0205	0.0205	0.0205	0.0186	0.0192	0.0186	0.0187	0	0.0186	0.0186	0.0186	0	0.0193	0.0186	0.0186	0.0186	0.0186	0.0193	0.0186	0.0186	0.0186	0.0186	0	0.0186	0.0186	0.0186	0.0186	0.0186	0.0192	0.0186	0	0.0186	0.0193	0.0186	0.0186	0.0186	0.0186	0.0187	0.0186	0	0.0193	0.0188	0.0186	0.0192	0.0193	0.0186	0.0186
[ 548] #CNBRN181-14|KR256024|BIOUG10842-F09|Ctenosciara_hyalipennis|COI-5P	CNBRN181-14	ENEA	0.0018	0.0018	0.0018	0	0	0	0	0.0186	0	0	0	0.0186	0	0	0	0	0	0	0	0	0	0	0.0186	0	0	0	0	0	0	0	0.0192	0	0	0	0	0	0	0	0	0.0186	0	0	0	0	0	0	0
[ 549] #CNBRN182-14|KR252559|BIOUG10842-F10|Ctenosciara_hyalipennis|COI-5P	CNBRN182-14	ENEA	0.0193	0.0193	0.0193	0.0178	0.0184	0.0175	0.018	0	0.0175	0.0175	0.0178	0	0.0186	0.0178	0.0179	0.0175	0.0179	0.0185	0.0175	0.0176	0.0178	0.0178	0	0.0175	0.0175	0.0175	0.0175	0.0178	0.0184	0.0175	0	0.0175	0.0185	0.0175	0.0175	0.0175	0.0175	0.018	0.0178	0	0.0185	0.018	0.018	0.0184	0.0185	0.0175	0.0178
[ 550] #CNBRN183-14|KR976027|BIOUG10842-F11|Ctenosciara_hyalipennis|COI-5P	CNBRN183-14	ENEA	0.0019	0.0019	0.0019	0	0	0	0	0.0178	0	0	0	0.0178	0	0	0	0	0	0	0	0	0	0	0.018	0	0	0	0	0	0	0	0.0187	0	0	0	0	0	0	0	0	0.0178	0	0	0	0	0	0	0
[ 551] #CNBRN187-14|KR256073|BIOUG10842-G03|Ctenosciara_hyalipennis|COI-5P	CNBRN187-14	ENEA	0.0016	0.0016	0.0016	0	0	0	0	0.0172	0	0	0	0.0175	0	0	0	0	0	0	0	0	0	0	0.0175	0	0	0	0	0	0	0	0.0184	0	0	0	0	0	0	0	0	0.0177	0	0	0	0	0	0	0
[ 552] #CNBRN191-14|KR241775|BIOUG10842-G07|Ctenosciara_hyalipennis|COI-5P	CNBRN191-14	ENEA	0.0019	0.0019	0.0019	0	0	0	0	0.017	0	0	0	0.017	0	0	0	0	0	0	0	0	0	0	0.017	0	0	0	0	0	0	0	0.0174	0	0	0	0	0	0	0	0	0.017	0	0	0	0	0	0	0
[ 553] #CNBRN192-14|KR248210|BIOUG10842-G08|Ctenosciara_hyalipennis|COI-5P	CNBRN192-14	ENEA	0.0016	0.0016	0.0016	0	0	0	0	0.0172	0	0	0	0.0175	0	0	0	0	0	0	0	0	0	0	0.0175	0	0	0	0	0	0	0	0.0184	0	0	0	0	0	0	0	0	0.0177	0	0	0	0	0	0	0
[ 554] #CNBRN196-14|KR977960|BIOUG10842-G12|Ctenosciara_hyalipennis|COI-5P	CNBRN196-14	ENEA	0.0019	0.0019	0.0019	0	0	0	0	0.0178	0	0	0	0.0178	0	0	0	0	0	0	0	0	0	0	0.018	0	0	0	0	0	0	0	0.0187	0	0	0	0	0	0	0	0	0.0178	0	0	0	0	0	0	0
[ 555] #CNBRN201-14|KR247666|BIOUG10842-H05|Ctenosciara_hyalipennis|COI-5P	CNBRN201-14	ENEA	0.0016	0.0016	0.0016	0	0	0	0	0.0172	0	0	0	0.0175	0	0	0	0	0	0	0	0	0	0	0.0175	0	0	0	0	0	0	0	0.0184	0	0	0	0	0	0	0	0	0.0177	0	0	0	0	0	0	0
[ 556] #CNBRN203-14|KR254990|BIOUG10842-H07|Ctenosciara_hyalipennis|COI-5P	CNBRN203-14	ENEA	0.0017	0.0017	0.0017	0	0	0	0	0.0172	0	0	0	0.0175	0	0	0	0	0	0	0	0	0	0	0.0175	0	0	0	0	0	0	0	0.0184	0	0	0	0	0	0	0	0	0.0177	0	0	0	0	0	0	0
[ 557] #CNBRN204-14|KR975808|BIOUG10842-H08|Ctenosciara_hyalipennis|COI-5P	CNBRN204-14	ENEA	0.0019	0.0019	0.0019	0	0	0	0	0.0178	0	0	0	0.0178	0	0	0	0	0	0	0	0	0	0	0.018	0	0	0	0	0	0	0	0.0187	0	0	0	0	0	0	0	0	0.0178	0	0	0	0	0	0	0
[ 558] #CNBRN210-14|KR258032|BIOUG10843-A03|Ctenosciara_hyalipennis|COI-5P	CNBRN210-14	ENEA	0.0188	0.0188	0.0188	0.0169	0.0175	0.0169	0.0171	0	0.0169	0.0169	0.0169	0	0.0176	0.0169	0.017	0.0169	0.017	0.0176	0.0169	0.0169	0.017	0.0169	0	0.0169	0.0169	0.0169	0.0169	0.0169	0.0175	0.0169	0	0.0169	0.0177	0.0169	0.0169	0.0169	0.0169	0.0171	0.0169	0	0.0176	0.0171	0.0169	0.0175	0.0176	0.0169	0.0169
[ 559] #CNBRN212-14|KR252736|BIOUG10843-A05|Ctenosciara_hyalipennis|COI-5P	CNBRN212-14	ENEA	0.0016	0.0016	0.0016	0	0	0	0	0.0172	0	0	0	0.0175	0	0	0	0	0	0	0	0	0	0	0.0175	0	0	0	0	0	0	0	0.0184	0	0	0	0	0	0	0	0	0.0177	0	0	0	0	0	0	0
[ 560] #CNBRN215-14|KR246345|BIOUG10843-A08|Ctenosciara_hyalipennis|COI-5P	CNBRN215-14	ENEA	0.0017	0.0017	0.0017	0	0	0	0	0.0172	0	0	0	0.0175	0	0	0	0	0	0	0	0	0	0	0.0175	0	0	0	0	0	0	0	0.0184	0	0	0	0	0	0	0	0	0.0177	0	0	0	0	0	0	0
[ 561] #CNBRN216-14|KR252123|BIOUG10843-A09|Ctenosciara_hyalipennis|COI-5P	CNBRN216-14	ENEA	0.0017	0.0017	0.0017	0	0	0	0	0.0172	0	0	0	0.0175	0	0	0	0	0	0	0	0	0	0	0.0175	0	0	0	0	0	0	0	0.0184	0	0	0	0	0	0	0	0	0.0177	0	0	0	0	0	0	0
[ 562] #CNBRN218-14|KR245062|BIOUG10843-A11|Ctenosciara_hyalipennis|COI-5P	CNBRN218-14	ENEA	0.0186	0.0186	0.0186	0.0175	0.0179	0.0172	0.0176	0	0.0172	0.0172	0.0175	0	0.0186	0.0175	0.0179	0.0172	0.0179	0.0182	0.0172	0.0176	0.0175	0.0175	0	0.0172	0.0172	0.0172	0.0172	0.0175	0.0184	0.0172	0	0.0172	0.0182	0.0172	0.0172	0.0175	0.0175	0.0176	0.0175	0	0.0182	0.0177	0.018	0.0179	0.0182	0.0172	0.0175
[ 563] #CNBRN219-14|KR258098|BIOUG10843-A12|Ctenosciara_hyalipennis|COI-5P	CNBRN219-14	ENEA	0.0017	0.0017	0.0017	0	0	0	0	0.0172	0	0	0	0.0175	0	0	0	0	0	0	0	0	0	0	0.0175	0	0	0	0	0	0	0	0.0184	0	0	0	0	0	0	0	0	0.0177	0	0	0	0	0	0	0
[ 564] #CNBRN220-14|KR257326|BIOUG10843-B01|Ctenosciara_hyalipennis|COI-5P	CNBRN220-14	ENEA	0.0018	0.0018	0.0018	0	0	0	0	0.0184	0	0	0	0.0184	0	0	0	0	0	0	0	0	0	0	0.0186	0	0	0	0	0	0	0	0.0192	0	0	0	0	0	0	0	0	0.0184	0	0	0	0	0	0	0
[ 565] #CNBRN221-14|KR250020|BIOUG10843-B02|Ctenosciara_hyalipennis|COI-5P	CNBRN221-14	ENEA	0.0017	0.0017	0.0017	0	0	0	0	0.0175	0	0	0	0.0178	0	0	0	0	0	0	0	0	0	0	0.0175	0	0	0	0	0	0	0	0.0184	0	0	0	0	0	0	0	0	0.018	0	0	0	0	0	0	0
[ 566] #CNBRN222-14|KR250553|BIOUG10843-B03|Ctenosciara_hyalipennis|COI-5P	CNBRN222-14	ENEA	0.0019	0.0019	0.0019	0	0	0	0	0.0171	0	0	0	0.0171	0	0	0	0	0	0	0	0	0	0	0.0174	0	0	0	0	0	0	0	0.018	0	0	0	0	0	0	0	0	0.0171	0	0	0	0	0	0	0
[ 567] #CNBRN225-14|KR251983|BIOUG10843-B06|Ctenosciara_hyalipennis|COI-5P	CNBRN225-14	ENEA	0.0017	0.0017	0.0017	0	0	0	0	0.0172	0	0	0	0.0175	0	0	0	0	0	0	0	0	0	0	0.0175	0	0	0	0	0	0	0	0.0184	0	0	0	0	0	0	0	0	0.0177	0	0	0	0	0	0	0
[ 568] #CNBRN226-14|KR240363|BIOUG10843-B07|Ctenosciara_hyalipennis|COI-5P	CNBRN226-14	ENEA	0.0016	0.0016	0.0016	0	0	0	0	0.0172	0	0	0	0.0175	0	0	0	0	0	0	0	0	0	0	0.0175	0	0	0	0	0	0	0	0.0184	0	0	0	0	0	0	0	0	0.0177	0	0	0	0	0	0	0
[ 569] #CNBRN227-14|KR235670|BIOUG10843-B08|Ctenosciara_hyalipennis|COI-5P	CNBRN227-14	ENEA	0.0016	0.0016	0.0016	0	0	0	0	0.0172	0	0	0	0.0175	0	0	0	0	0	0	0	0	0	0	0.0175	0	0	0	0	0	0	0	0.0184	0	0	0	0	0	0	0	0	0.0177	0	0	0	0	0	0	0
[ 570] #CNBRN232-14|KR254279|BIOUG10843-C01|Ctenosciara_hyalipennis|COI-5P	CNBRN232-14	ENEA	0.0017	0.0017	0.0017	0	0	0	0	0.0176	0	0	0	0.0179	0	0	0	0	0	0	0	0	0	0	0.0176	0	0	0	0	0	0	0	0.0184	0	0	0	0	0	0	0	0	0.0181	0	0	0	0	0	0	0
[ 571] #CNBRN233-14|KR253207|BIOUG10843-C02|Ctenosciara_hyalipennis|COI-5P	CNBRN233-14	ENEA	0.0017	0.0017	0.0017	0	0	0	0	0.0176	0	0	0	0.0176	0	0	0	0	0	0	0	0	0	0	0.0179	0	0	0	0	0	0	0	0.0184	0	0	0	0	0	0	0	0	0.0177	0	0	0	0	0	0	0
[ 572] #CNBRN234-14|KR247168|BIOUG10843-C03|Ctenosciara_hyalipennis|COI-5P	CNBRN234-14	ENEA	0.0016	0.0016	0.0016	0	0	0	0	0.0172	0	0	0	0.0175	0	0	0	0	0	0	0	0	0	0	0.0175	0	0	0	0	0	0	0	0.0184	0	0	0	0	0	0	0	0	0.0177	0	0	0	0	0	0	0
[ 573] #CNBRN235-14|KR243242|BIOUG10843-C04|Ctenosciara_hyalipennis|COI-5P	CNBRN235-14	ENEA	0.0018	0.0018	0.0018	0	0	0	0	0.0184	0	0	0	0.0184	0	0	0	0	0	0	0	0	0	0	0.0186	0	0	0	0	0	0	0	0.0192	0	0	0	0	0	0	0	0	0.0184	0	0	0	0	0	0	0
[ 574] #CNBRN236-14|KR244913|BIOUG10843-C05|Ctenosciara_hyalipennis|COI-5P	CNBRN236-14	ENEA	0.0019	0.0019	0.0019	0	0	0	0	0.0175	0	0	0	0.0175	0	0	0	0	0	0	0	0	0	0	0.0175	0	0	0	0	0	0	0	0.018	0	0	0	0	0	0	0	0	0.0175	0	0	0	0	0	0	0
[ 575] #CNBRN237-14|KR255713|BIOUG10843-C06|Ctenosciara_hyalipennis|COI-5P	CNBRN237-14	ENEA	0.0016	0.0016	0.0016	0	0	0	0	0.0172	0	0	0	0.0175	0	0	0	0	0	0	0	0	0	0	0.0175	0	0	0	0	0	0	0	0.0184	0	0	0	0	0	0	0	0	0.0177	0	0	0	0	0	0	0
[ 576] #CNBRN242-14|KR977030|BIOUG10843-C11|Ctenosciara_hyalipennis|COI-5P	CNBRN242-14	ENEA	0.002	0.002	0.002	0	0	0	0	0.0178	0	0	0	0.0178	0	0	0	0	0	0	0	0	0	0	0.0181	0	0	0	0	0	0	0	0.0188	0	0	0	0	0	0	0	0	0.0178	0	0	0	0	0	0	0
[ 577] #CNBRO147-14|KR244725|BIOUG11004-A06|Ctenosciara_hyalipennis|COI-5P	CNBRO147-14	ENEA	0.0017	0.0017	0.0017	0	0	0	0	0.0172	0	0	0	0.0175	0	0	0	0	0	0	0	0	0	0	0.0175	0	0	0	0	0	0	0	0.0184	0	0	0	0	0	0	0	0	0.0177	0	0	0	0	0	0	0
[ 578] #CNBRO264-14|KR254703|BIOUG11091-A02|Ctenosciara_hyalipennis|COI-5P	CNBRO264-14	ENEA	0.0018	0.0018	0.0018	0	0	0	0	0.0166	0	0	0	0.0166	0	0	0	0	0	0	0	0	0	0	0.0169	0	0	0	0	0	0	0	0.0174	0	0	0	0	0	0	0	0	0.0166	0	0	0	0	0	0	0
[ 579] #CNBRO423-14|KR254912|BIOUG11092-F06|Ctenosciara_hyalipennis|COI-5P	CNBRO423-14	ENEA	0.0019	0.0019	0.0019	0	0	0	0	0.017	0	0	0	0.017	0	0	0	0	0	0	0	0	0	0	0.0172	0	0	0	0	0	0	0	0.0178	0	0	0	0	0	0	0	0	0.017	0	0	0	0	0	0	0
[ 580] #CNBRO469-14|KR242729|BIOUG11093-B05|Ctenosciara_hyalipennis|COI-5P	CNBRO469-14	ENEA	0.0017	0.0017	0.0017	0	0	0	0	0.0173	0	0	0	0.0176	0	0	0	0	0	0	0	0	0	0	0.0175	0	0	0	0	0	0	0	0.0184	0	0	0	0	0	0	0	0	0.0177	0	0	0	0	0	0	0
[ 581] #CNBRO517-14|KR234233|BIOUG11093-F05|Ctenosciara_hyalipennis|COI-5P	CNBRO517-14	ENEA	0.0017	0.0017	0.0017	0	0	0	0	0.0172	0	0	0	0.0176	0	0	0	0	0	0	0	0	0	0	0.0175	0	0	0	0	0	0	0	0.0184	0	0	0	0	0	0	0	0	0.0177	0	0	0	0	0	0	0
[ 582] #CNBRP020-14|KR234581|BIOUG11104-B08|Ctenosciara_hyalipennis|COI-5P	CNBRP020-14	ENEA	0.0017	0.0017	0.0017	0	0	0	0	0.0177	0	0	0	0.0177	0	0	0	0	0	0	0	0	0	0	0.018	0	0	0	0	0	0	0	0.0185	0	0	0	0	0	0	0	0	0.0177	0	0	0	0	0	0	0
[ 583] #CNBRP041-14|KR254389|BIOUG11104-D05|Ctenosciara_hyalipennis|COI-5P	CNBRP041-14	ENEA	0.0017	0.0017	0.0017	0	0	0	0	0.0172	0	0	0	0.0175	0	0	0	0	0	0	0	0	0	0	0.0175	0	0	0	0	0	0	0	0.0184	0	0	0	0	0	0	0	0	0.0177	0	0	0	0	0	0	0
[ 584] #CNBRP1009-14|KR239011|BIOUG11163-E11|Ctenosciara_hyalipennis|COI-5P	CNBRP1009-14	ENEA	0.0189	0.0189	0.0189	0.0175	0.0179	0.0172	0.0176	0	0.0172	0.0172	0.0175	0	0.0186	0.0175	0.0179	0.0172	0.0179	0.0182	0.0172	0.0176	0.0175	0.0175	0	0.0172	0.0172	0.0172	0.0172	0.0175	0.0184	0.0172	0	0.0172	0.0182	0.0172	0.0172	0.0175	0.0175	0.0176	0.0175	0	0.0182	0.0177	0.018	0.0179	0.0182	0.0172	0.0175
[ 585] #CNBRP1014-14|KR249286|BIOUG11163-F04|Ctenosciara_hyalipennis|COI-5P	CNBRP1014-14	ENEA	0.0017	0.0017	0.0017	0	0	0	0	0.0175	0	0	0	0.0175	0	0	0	0	0	0	0	0	0	0	0.0178	0	0	0	0	0	0	0	0.0184	0	0	0	0	0	0	0	0	0.0177	0	0	0	0	0	0	0
[ 586] #CNBRP1040-14|KR252201|BIOUG11163-H06|Ctenosciara_hyalipennis|COI-5P	CNBRP1040-14	ENEA	0.0017	0.0017	0.0017	0	0	0	0	0.0176	0	0	0	0.0176	0	0	0	0	0	0	0	0	0	0	0.0179	0	0	0	0	0	0	0	0.0184	0	0	0	0	0	0	0	0	0.0177	0	0	0	0	0	0	0
[ 587] #CNBRP111-14|KR250162|BIOUG11144-B04|Ctenosciara_hyalipennis|COI-5P	CNBRP111-14	ENEA	0.0017	0.0017	0.0017	0	0	0	0	0.0172	0	0	0	0.0175	0	0	0	0	0	0	0	0	0	0	0.0175	0	0	0	0	0	0	0	0.0184	0	0	0	0	0	0	0	0	0.0177	0	0	0	0	0	0	0
[ 588] #CNBRP1190-14|KR235133|BIOUG11165-E02|Ctenosciara_hyalipennis|COI-5P	CNBRP1190-14	ENEA	0.0017	0.0017	0.0017	0	0	0	0	0.0172	0	0	0	0.0176	0	0	0	0	0	0	0	0	0	0	0.0175	0	0	0	0	0	0	0	0.0184	0	0	0	0	0	0	0	0	0.0177	0	0	0	0	0	0	0
[ 589] #CNBRP1208-14|KR243098|BIOUG11165-F08|Ctenosciara_hyalipennis|COI-5P	CNBRP1208-14	ENEA	0.0019	0.0019	0.0019	0	0	0	0	0.017	0	0	0	0.017	0	0	0	0	0	0	0	0	0	0	0.017	0	0	0	0	0	0	0	0.0175	0	0	0	0	0	0	0	0	0.017	0	0	0	0	0	0	0
[ 590] #CNBRP1232-14|KR250256|BIOUG11165-H08|Ctenosciara_hyalipennis|COI-5P	CNBRP1232-14	ENEA	0.0018	0.0018	0.0018	0	0	0	0	0.0184	0	0	0	0.0184	0	0	0	0	0	0	0	0	0	0	0.0184	0	0	0	0	0	0	0	0.0189	0	0	0	0	0	0	0	0	0.0184	0	0	0	0	0	0	0
[ 591] #CNBRP1560-14|KR238846|BIOUG11211-A12|Ctenosciara_hyalipennis|COI-5P	CNBRP1560-14	ENEA	0.0018	0.0018	0.0018	0	0	0	0	0.0187	0	0	0	0.0187	0	0	0	0	0	0	0	0	0	0	0.0187	0	0	0	0	0	0	0	0.0187	0	0	0	0	0	0	0	0	0.0187	0	0	0	0	0	0	0
[ 592] #CNBRP1562-14|KR244562|BIOUG11211-B02|Ctenosciara_hyalipennis|COI-5P	CNBRP1562-14	ENEA	0.0018	0.0018	0.0018	0	0	0	0	0.018	0	0	0	0.018	0	0	0	0	0	0	0	0	0	0	0.018	0	0	0	0	0	0	0	0.0185	0	0	0	0	0	0	0	0	0.018	0	0	0	0	0	0	0
[ 593] #CNBRP181-14|KR247917|BIOUG11144-H02|Ctenosciara_hyalipennis|COI-5P	CNBRP181-14	ENEA	0.0018	0.0018	0.0018	0	0	0	0	0.0178	0	0	0	0.0178	0	0	0	0	0	0	0	0	0	0	0.0178	0	0	0	0	0	0	0	0.0184	0	0	0	0	0	0	0	0	0.018	0	0	0	0	0	0	0
[ 594] #CNBRP1912-14|KR239419|BIOUG11214-G07|Ctenosciara_hyalipennis|COI-5P	CNBRP1912-14	ENEA	0.0016	0.0016	0.0016	0	0	0	0	0.0172	0	0	0	0.0175	0	0	0	0	0	0	0	0	0	0	0.0175	0	0	0	0	0	0	0	0.0184	0	0	0	0	0	0	0	0	0.0177	0	0	0	0	0	0	0
[ 595] #CNBRP228-14|KR235104|BIOUG11145-D02|Ctenosciara_hyalipennis|COI-5P	CNBRP228-14	ENEA	0.0017	0.0017	0.0017	0	0	0	0	0.0172	0	0	0	0.0175	0	0	0	0	0	0	0	0	0	0	0.0175	0	0	0	0	0	0	0	0.0184	0	0	0	0	0	0	0	0	0.0177	0	0	0	0	0	0	0
[ 596] #CNBRP229-14|KR236738|BIOUG11145-D03|Ctenosciara_hyalipennis|COI-5P	CNBRP229-14	ENEA	0.0017	0.0017	0.0017	0	0	0	0	0.0172	0	0	0	0.0175	0	0	0	0	0	0	0	0	0	0	0.0175	0	0	0	0	0	0	0	0.0184	0	0	0	0	0	0	0	0	0.0177	0	0	0	0	0	0	0
[ 597] #CNBRP246-14|KR254987|BIOUG11145-E08|Ctenosciara_hyalipennis|COI-5P	CNBRP246-14	ENEA	0.0017	0.0017	0.0017	0	0	0	0	0.0172	0	0	0	0.0175	0	0	0	0	0	0	0	0	0	0	0.0175	0	0	0	0	0	0	0	0.0184	0	0	0	0	0	0	0	0	0.0177	0	0	0	0	0	0	0
[ 598] #CNBRP321-14|KR244908|BIOUG11146-C12|Ctenosciara_hyalipennis|COI-5P	CNBRP321-14	ENEA	0.0018	0.0018	0.0018	0	0	0	0	0.0178	0	0	0	0.0178	0	0	0	0	0	0	0	0	0	0	0.0178	0	0	0	0	0	0	0	0.0184	0	0	0	0	0	0	0	0	0.018	0	0	0	0	0	0	0
[ 599] #CNBRP344-14|KR258113|BIOUG11146-E11|Ctenosciara_hyalipennis|COI-5P	CNBRP344-14	ENEA	0.0017	0.0017	0.0017	0	0	0	0	0.0175	0	0	0	0.0178	0	0	0	0	0	0	0	0	0	0	0.0175	0	0	0	0	0	0	0	0.0184	0	0	0	0	0	0	0	0	0.018	0	0	0	0	0	0	0
[ 600] #CNBRP345-14|KR245447|BIOUG11146-E12|Ctenosciara_hyalipennis|COI-5P	CNBRP345-14	ENEA	0.0017	0.0017	0.0017	0	0	0	0	0.0172	0	0	0	0.0175	0	0	0	0	0	0	0	0	0	0	0.0175	0	0	0	0	0	0	0	0.0184	0	0	0	0	0	0	0	0	0.0177	0	0	0	0	0	0	0
[ 601] #CNBRP360-14|KR234390|BIOUG11146-G03|Ctenosciara_hyalipennis|COI-5P	CNBRP360-14	ENEA	0.0017	0.0017	0.0017	0	0	0	0	0.0172	0	0	0	0.0175	0	0	0	0	0	0	0	0	0	0	0.0175	0	0	0	0	0	0	0	0.0184	0	0	0	0	0	0	0	0	0.0177	0	0	0	0	0	0	0
[ 602] #CNBRP393-14|KR254712|BIOUG11147-B01|Ctenosciara_hyalipennis|COI-5P	CNBRP393-14	ENEA	0.0018	0.0018	0.0018	0	0	0	0	0.0183	0	0	0	0.0183	0	0	0	0	0	0	0	0	0	0	0.0186	0	0	0	0	0	0	0	0.0192	0	0	0	0	0	0	0	0	0.0183	0	0	0	0	0	0	0
[ 603] #CNBRP435-14|KR235457|BIOUG11147-E07|Ctenosciara_hyalipennis|COI-5P	CNBRP435-14	ENEA	0.0017	0.0017	0.0017	0	0	0	0	0.0175	0	0	0	0.0175	0	0	0	0	0	0	0	0	0	0	0.0178	0	0	0	0	0	0	0	0.0184	0	0	0	0	0	0	0	0	0.0177	0	0	0	0	0	0	0
[ 604] #CNBRP452-14|KR253445|BIOUG11147-F12|Ctenosciara_hyalipennis|COI-5P	CNBRP452-14	ENEA	0.0017	0.0017	0.0017	0	0	0	0	0.0172	0	0	0	0.0175	0	0	0	0	0	0	0	0	0	0	0.0175	0	0	0	0	0	0	0	0.0184	0	0	0	0	0	0	0	0	0.0177	0	0	0	0	0	0	0
[ 605] #CNBRP460-14|KR234326|BIOUG11147-G08|Ctenosciara_hyalipennis|COI-5P	CNBRP460-14	ENEA	0.0017	0.0017	0.0017	0	0	0	0	0.0172	0	0	0	0.0175	0	0	0	0	0	0	0	0	0	0	0.0175	0	0	0	0	0	0	0	0.0184	0	0	0	0	0	0	0	0	0.0177	0	0	0	0	0	0	0
[ 606] #CNBRP470-14|KR238133|BIOUG11147-H06|Ctenosciara_hyalipennis|COI-5P	CNBRP470-14	ENEA	0.0017	0.0017	0.0017	0	0	0	0	0.0172	0	0	0	0.0175	0	0	0	0	0	0	0	0	0	0	0.0175	0	0	0	0	0	0	0	0.0184	0	0	0	0	0	0	0	0	0.0177	0	0	0	0	0	0	0
[ 607] #CNBRP472-14|KR249195|BIOUG11147-H08|Ctenosciara_hyalipennis|COI-5P	CNBRP472-14	ENEA	0.0017	0.0017	0.0017	0	0	0	0	0.0175	0	0	0	0.0178	0	0	0	0	0	0	0	0	0	0	0.0175	0	0	0	0	0	0	0	0.0184	0	0	0	0	0	0	0	0	0.018	0	0	0	0	0	0	0
[ 608] #CNBRP473-14|KR243108|BIOUG11147-H09|Ctenosciara_hyalipennis|COI-5P	CNBRP473-14	ENEA	0.0017	0.0017	0.0017	0	0	0	0	0.0175	0	0	0	0.0175	0	0	0	0	0	0	0	0	0	0	0.0178	0	0	0	0	0	0	0	0.0184	0	0	0	0	0	0	0	0	0.0177	0	0	0	0	0	0	0
[ 609] #CNBRP489-14|KR253878|BIOUG11148-B02|Ctenosciara_hyalipennis|COI-5P	CNBRP489-14	ENEA	0.0018	0.0018	0.0018	0	0	0	0	0.0178	0	0	0	0.0178	0	0	0	0	0	0	0	0	0	0	0.0178	0	0	0	0	0	0	0	0.0184	0	0	0	0	0	0	0	0	0.018	0	0	0	0	0	0	0
[ 610] #CNBRP507-14|KR254820|BIOUG11148-C08|Ctenosciara_hyalipennis|COI-5P	CNBRP507-14	ENEA	0.0017	0.0017	0.0017	0	0	0	0	0.0172	0	0	0	0.0175	0	0	0	0	0	0	0	0	0	0	0.0175	0	0	0	0	0	0	0	0.0184	0	0	0	0	0	0	0	0	0.0177	0	0	0	0	0	0	0
[ 611] #CNBRP550-14|KR246718|BIOUG11148-G03|Ctenosciara_hyalipennis|COI-5P	CNBRP550-14	ENEA	0.0017	0.0017	0.0017	0	0	0	0	0.0172	0	0	0	0.0175	0	0	0	0	0	0	0	0	0	0	0.0175	0	0	0	0	0	0	0	0.0184	0	0	0	0	0	0	0	0	0.0177	0	0	0	0	0	0	0
[ 612] #CNBRP560-14|KR258671|BIOUG11148-H01|Ctenosciara_hyalipennis|COI-5P	CNBRP560-14	ENEA	0.0017	0.0017	0.0017	0	0	0	0	0.0172	0	0	0	0.0175	0	0	0	0	0	0	0	0	0	0	0.0175	0	0	0	0	0	0	0	0.0184	0	0	0	0	0	0	0	0	0.0177	0	0	0	0	0	0	0
[ 613] #CNBRP582-14|KR238639|BIOUG11149-A12|Ctenosciara_hyalipennis|COI-5P	CNBRP582-14	ENEA	0.0018	0.0018	0.0018	0	0	0	0	0.0183	0	0	0	0.0183	0	0	0	0	0	0	0	0	0	0	0.0186	0	0	0	0	0	0	0	0.0192	0	0	0	0	0	0	0	0	0.0183	0	0	0	0	0	0	0
[ 614] #CNBRP585-14|KR237946|BIOUG11149-B03|Ctenosciara_hyalipennis|COI-5P	CNBRP585-14	ENEA	0.0017	0.0017	0.0017	0	0	0	0	0.0172	0	0	0	0.0175	0	0	0	0	0	0	0	0	0	0	0.0175	0	0	0	0	0	0	0	0.0184	0	0	0	0	0	0	0	0	0.0177	0	0	0	0	0	0	0
[ 615] #CNBRP590-14|KR240059|BIOUG11149-B08|Ctenosciara_hyalipennis|COI-5P	CNBRP590-14	ENEA	0.0016	0.0016	0.0016	0	0	0	0	0.0172	0	0	0	0.0175	0	0	0	0	0	0	0	0	0	0	0.0175	0	0	0	0	0	0	0	0.0184	0	0	0	0	0	0	0	0	0.0177	0	0	0	0	0	0	0
[ 616] #CNBRP635-14|KR256785|BIOUG11149-F05|Ctenosciara_hyalipennis|COI-5P	CNBRP635-14	ENEA	0.0017	0.0017	0.0017	0	0	0	0	0.0172	0	0	0	0.0175	0	0	0	0	0	0	0	0	0	0	0.0175	0	0	0	0	0	0	0	0.0184	0	0	0	0	0	0	0	0	0.0177	0	0	0	0	0	0	0
[ 617] #CNBRP661-14|KR251400|BIOUG11149-H07|Ctenosciara_hyalipennis|COI-5P	CNBRP661-14	ENEA	0.0017	0.0017	0.0017	0	0	0	0	0.0172	0	0	0	0.0175	0	0	0	0	0	0	0	0	0	0	0.0175	0	0	0	0	0	0	0	0.0184	0	0	0	0	0	0	0	0	0.0177	0	0	0	0	0	0	0
[ 618] #CNBRP714-14|KR245434|BIOUG11150-E01|Ctenosciara_hyalipennis|COI-5P	CNBRP714-14	ENEA	0.0017	0.0017	0.0017	0	0	0	0	0.0172	0	0	0	0.0175	0	0	0	0	0	0	0	0	0	0	0.0175	0	0	0	0	0	0	0	0.0184	0	0	0	0	0	0	0	0	0.0177	0	0	0	0	0	0	0
[ 619] #CNBRP746-14|KR252240|BIOUG11150-G09|Ctenosciara_hyalipennis|COI-5P	CNBRP746-14	ENEA	0.0017	0.0017	0.0017	0	0	0	0	0.0172	0	0	0	0.0175	0	0	0	0	0	0	0	0	0	0	0.0175	0	0	0	0	0	0	0	0.0184	0	0	0	0	0	0	0	0	0.0177	0	0	0	0	0	0	0
[ 620] #CNBRP915-14|KR246842|BIOUG11162-E12|Ctenosciara_hyalipennis|COI-5P	CNBRP915-14	ENEA	0.0017	0.0017	0.0017	0	0	0	0	0.0172	0	0	0	0.0175	0	0	0	0	0	0	0	0	0	0	0.0175	0	0	0	0	0	0	0	0.0184	0	0	0	0	0	0	0	0	0.0177	0	0	0	0	0	0	0
[ 621] #CNBRP930-14|KR245933|BIOUG11162-G03|Ctenosciara_hyalipennis|COI-5P	CNBRP930-14	ENEA	0.0017	0.0017	0.0017	0	0	0	0	0.0172	0	0	0	0.0175	0	0	0	0	0	0	0	0	0	0	0.0175	0	0	0	0	0	0	0	0.0184	0	0	0	0	0	0	0	0	0.0177	0	0	0	0	0	0	0
[ 622] #CNBRP937-14|KR244141|BIOUG11162-G10|Ctenosciara_hyalipennis|COI-5P	CNBRP937-14	ENEA	0.0017	0.0017	0.0017	0	0	0	0	0.0175	0	0	0	0.0178	0	0	0	0	0	0	0	0	0	0	0.0175	0	0	0	0	0	0	0	0.0184	0	0	0	0	0	0	0	0	0.018	0	0	0	0	0	0	0
[ 623] #CNBRP939-14|KR254084|BIOUG11162-G12|Ctenosciara_hyalipennis|COI-5P	CNBRP939-14	ENEA	0.0018	0.0018	0.0018	0	0	0	0	0.0181	0	0	0	0.0181	0	0	0	0	0	0	0	0	0	0	0.0184	0	0	0	0	0	0	0	0.0189	0	0	0	0	0	0	0	0	0.0181	0	0	0	0	0	0	0
[ 624] #CNBRP969-14|KR252937|BIOUG11163-B07|Ctenosciara_hyalipennis|COI-5P	CNBRP969-14	ENEA	0.0017	0.0017	0.0017	0	0	0	0	0.0172	0	0	0	0.0175	0	0	0	0	0	0	0	0	0	0	0.0175	0	0	0	0	0	0	0	0.0184	0	0	0	0	0	0	0	0	0.0177	0	0	0	0	0	0	0
[ 625] #CNBRP990-14|KR258094|BIOUG11163-D04|Ctenosciara_hyalipennis|COI-5P	CNBRP990-14	ENEA	0.0018	0.0018	0.0018	0	0	0	0	0.018	0	0	0	0.018	0	0	0	0	0	0	0	0	0	0	0.018	0	0	0	0	0	0	0	0.0185	0	0	0	0	0	0	0	0	0.018	0	0	0	0	0	0	0
[ 626] #CNBRP997-14|KR254220|BIOUG11163-D11|Ctenosciara_hyalipennis|COI-5P	CNBRP997-14	ENEA	0.0017	0.0017	0.0017	0	0	0	0	0.0172	0	0	0	0.0175	0	0	0	0	0	0	0	0	0	0	0.0175	0	0	0	0	0	0	0	0.0184	0	0	0	0	0	0	0	0	0.0177	0	0	0	0	0	0	0
[ 627] #CNBRQ168-14|KR251538|BIOUG11222-A05|Ctenosciara_hyalipennis|COI-5P	CNBRQ168-14	ENEA	0.0017	0.0017	0.0017	0	0	0	0	0.0172	0	0	0	0.0175	0	0	0	0	0	0	0	0	0	0	0.0175	0	0	0	0	0	0	0	0.0184	0	0	0	0	0	0	0	0	0.0177	0	0	0	0	0	0	0
[ 628] #CNBRQ175-14|KR240103|BIOUG11222-A12|Ctenosciara_hyalipennis|COI-5P	CNBRQ175-14	ENEA	0.0017	0.0017	0.0017	0	0	0	0	0.0177	0	0	0	0.0177	0	0	0	0	0	0	0	0	0	0	0.0179	0	0	0	0	0	0	0	0.0185	0	0	0	0	0	0	0	0	0.0177	0	0	0	0	0	0	0
[ 629] #CNBRQ189-14|KR242809|BIOUG11222-C02|Ctenosciara_hyalipennis|COI-5P	CNBRQ189-14	ENEA	0.0017	0.0017	0.0017	0	0	0	0	0.0172	0	0	0	0.0175	0	0	0	0	0	0	0	0	0	0	0.0175	0	0	0	0	0	0	0	0.0184	0	0	0	0	0	0	0	0	0.0177	0	0	0	0	0	0	0
[ 630] #CNBRQ190-14|KR251204|BIOUG11222-C03|Ctenosciara_hyalipennis|COI-5P	CNBRQ190-14	ENEA	0.0017	0.0017	0.0017	0	0	0	0	0.0172	0	0	0	0.0175	0	0	0	0	0	0	0	0	0	0	0.0175	0	0	0	0	0	0	0	0.0184	0	0	0	0	0	0	0	0	0.0177	0	0	0	0	0	0	0
[ 631] #CNBRQ206-14|KR257165|BIOUG11222-D07|Ctenosciara_hyalipennis|COI-5P	CNBRQ206-14	ENEA	0.0018	0.0018	0.0018	0	0	0	0	0.0167	0	0	0	0.0167	0	0	0	0	0	0	0	0	0	0	0.017	0	0	0	0	0	0	0	0.0175	0	0	0	0	0	0	0	0	0.0167	0	0	0	0	0	0	0
[ 632] #CNBRQ211-14|KR253801|BIOUG11222-D12|Ctenosciara_hyalipennis|COI-5P	CNBRQ211-14	ENEA	0.0017	0.0017	0.0017	0	0	0	0	0.0172	0	0	0	0.0175	0	0	0	0	0	0	0	0	0	0	0.0175	0	0	0	0	0	0	0	0.0184	0	0	0	0	0	0	0	0	0.0177	0	0	0	0	0	0	0
[ 633] #CNBRQ216-14|KR234689|BIOUG11222-E05|Ctenosciara_hyalipennis|COI-5P	CNBRQ216-14	ENEA	0.0018	0.0018	0.0018	0	0	0	0	0.0167	0	0	0	0.0167	0	0	0	0	0	0	0	0	0	0	0.0169	0	0	0	0	0	0	0	0.0175	0	0	0	0	0	0	0	0	0.0167	0	0	0	0	0	0	0
[ 634] #CNBRQ221-14|KR234843|BIOUG11222-E10|Ctenosciara_hyalipennis|COI-5P	CNBRQ221-14	ENEA	0.0018	0.0018	0.0018	0	0	0	0	0.0183	0	0	0	0.0183	0	0	0	0	0	0	0	0	0	0	0.0186	0	0	0	0	0	0	0	0.0192	0	0	0	0	0	0	0	0	0.0183	0	0	0	0	0	0	0
[ 635] #CNBRQ229-14|KR241331|BIOUG11222-F06|Ctenosciara_hyalipennis|COI-5P	CNBRQ229-14	ENEA	0.0019	0.0019	0.0019	0	0	0	0	0.0169	0	0	0	0.0169	0	0	0	0	0	0	0	0	0	0	0.0169	0	0	0	0	0	0	0	0.0174	0	0	0	0	0	0	0	0	0.0169	0	0	0	0	0	0	0
[ 636] #CNBRQ230-14|KR242100|BIOUG11222-F07|Ctenosciara_hyalipennis|COI-5P	CNBRQ230-14	ENEA	0.0018	0.0018	0.0018	0	0	0	0	0.0186	0	0	0	0.0186	0	0	0	0	0	0	0	0	0	0	0.0186	0	0	0	0	0	0	0	0.0192	0	0	0	0	0	0	0	0	0.0186	0	0	0	0	0	0	0
[ 637] #CNBRQ261-14|KR258645|BIOUG11223-A03|Ctenosciara_hyalipennis|COI-5P	CNBRQ261-14	ENEA	0.0018	0.0018	0.0018	0	0	0	0	0.0148	0	0	0	0.0148	0	0	0	0	0	0	0	0	0	0	0.0151	0	0	0	0	0	0	0	0.0156	0	0	0	0	0	0	0	0	0.0148	0	0	0	0	0	0	0
[ 638] #CNBRQ269-14|KR244535|BIOUG11223-A11|Ctenosciara_hyalipennis|COI-5P	CNBRQ269-14	ENEA	0.0018	0.0018	0.0018	0	0	0	0	0.0168	0	0	0	0.0172	0	0	0	0	0	0	0	0	0	0	0.0169	0	0	0	0	0	0	0	0.0172	0	0	0	0	0	0	0	0	0.0173	0	0	0	0	0	0	0
[ 639] #CNBRQ278-14|KR249598|BIOUG11223-B08|Ctenosciara_hyalipennis|COI-5P	CNBRQ278-14	ENEA	0.0018	0.0018	0.0018	0	0	0	0	0.0167	0	0	0	0.0167	0	0	0	0	0	0	0	0	0	0	0.0169	0	0	0	0	0	0	0	0.0175	0	0	0	0	0	0	0	0	0.0167	0	0	0	0	0	0	0
[ 640] #CNBRQ294-14|KR238873|BIOUG11223-C12|Ctenosciara_hyalipennis|COI-5P	CNBRQ294-14	ENEA	0.0017	0.0017	0.0017	0	0	0	0	0.0177	0	0	0	0.0177	0	0	0	0	0	0	0	0	0	0	0.018	0	0	0	0	0	0	0	0.0185	0	0	0	0	0	0	0	0	0.0177	0	0	0	0	0	0	0
[ 641] #CNBRQ300-14|KR236385|BIOUG11223-D06|Ctenosciara_hyalipennis|COI-5P	CNBRQ300-14	ENEA	0.0019	0.0019	0.0019	0	0	0	0	0.0153	0	0	0	0.0153	0	0	0	0	0	0	0	0	0	0	0.0155	0	0	0	0	0	0	0	0.016	0	0	0	0	0	0	0	0	0.0153	0	0	0	0	0	0	0
[ 642] #CNBRQ312-14|KR242338|BIOUG11223-E06|Ctenosciara_hyalipennis|COI-5P	CNBRQ312-14	ENEA	0.0019	0.0019	0.0019	0	0	0	0	0.0169	0	0	0	0.0169	0	0	0	0	0	0	0	0	0	0	0.0169	0	0	0	0	0	0	0	0.0175	0	0	0	0	0	0	0	0	0.0169	0	0	0	0	0	0	0
[ 643] #CNBRQ323-14|KR245755|BIOUG11223-F05|Ctenosciara_hyalipennis|COI-5P	CNBRQ323-14	ENEA	0.0019	0.0019	0.0019	0	0	0	0	0.017	0	0	0	0.017	0	0	0	0	0	0	0	0	0	0	0.017	0	0	0	0	0	0	0	0.0175	0	0	0	0	0	0	0	0	0.017	0	0	0	0	0	0	0
[ 644] #CNBRQ326-14|KR236603|BIOUG11223-F08|Ctenosciara_hyalipennis|COI-5P	CNBRQ326-14	ENEA	0.0019	0.0019	0.0019	0	0	0	0	0.0177	0	0	0	0.0177	0	0	0	0	0	0	0	0	0	0	0.0177	0	0	0	0	0	0	0	0.0177	0	0	0	0	0	0	0	0	0.0177	0	0	0	0	0	0	0
[ 645] #CNBRQ364-14|KR247612|BIOUG11224-A11|Ctenosciara_hyalipennis|COI-5P	CNBRQ364-14	ENEA	0.0019	0.0019	0.0019	0	0	0	0	0.0169	0	0	0	0.0169	0	0	0	0	0	0	0	0	0	0	0.0169	0	0	0	0	0	0	0	0.0175	0	0	0	0	0	0	0	0	0.0169	0	0	0	0	0	0	0
[ 646] #CNBRQ369-14|KR240159|BIOUG11224-B04|Ctenosciara_hyalipennis|COI-5P	CNBRQ369-14	ENEA	0.0018	0.0018	0.0018	0	0	0	0	0.0167	0	0	0	0.0167	0	0	0	0	0	0	0	0	0	0	0.0169	0	0	0	0	0	0	0	0.0175	0	0	0	0	0	0	0	0	0.0167	0	0	0	0	0	0	0
[ 647] #CNBRQ372-14|KR255273|BIOUG11224-B07|Ctenosciara_hyalipennis|COI-5P	CNBRQ372-14	ENEA	0.0018	0.0018	0.0018	0	0	0	0	0.0167	0	0	0	0.0167	0	0	0	0	0	0	0	0	0	0	0.017	0	0	0	0	0	0	0	0.0175	0	0	0	0	0	0	0	0	0.0167	0	0	0	0	0	0	0
[ 648] #CNBRQ373-14|KR245393|BIOUG11224-B08|Ctenosciara_hyalipennis|COI-5P	CNBRQ373-14	ENEA	0.0018	0.0018	0.0018	0	0	0	0	0.0167	0	0	0	0.0167	0	0	0	0	0	0	0	0	0	0	0.0169	0	0	0	0	0	0	0	0.0175	0	0	0	0	0	0	0	0	0.0167	0	0	0	0	0	0	0
[ 649] #CNBRQ381-14|KR253688|BIOUG11224-C04|Ctenosciara_hyalipennis|COI-5P	CNBRQ381-14	ENEA	0.0018	0.0018	0.0018	0	0	0	0	0.0167	0	0	0	0.0167	0	0	0	0	0	0	0	0	0	0	0.0169	0	0	0	0	0	0	0	0.0175	0	0	0	0	0	0	0	0	0.0167	0	0	0	0	0	0	0
[ 650] #CNBRQ391-14|KR250976|BIOUG11224-D02|Ctenosciara_hyalipennis|COI-5P	CNBRQ391-14	ENEA	0.0018	0.0018	0.0018	0	0	0	0	0.0167	0	0	0	0.0167	0	0	0	0	0	0	0	0	0	0	0.0169	0	0	0	0	0	0	0	0.0175	0	0	0	0	0	0	0	0	0.0167	0	0	0	0	0	0	0
[ 651] #CNBRQ398-14|KR975696|BIOUG11224-D09|Ctenosciara_hyalipennis|COI-5P	CNBRQ398-14	ENEA	0.0019	0.0019	0.0019	0	0	0	0	0.0178	0	0	0	0.0178	0	0	0	0	0	0	0	0	0	0	0.018	0	0	0	0	0	0	0	0.0187	0	0	0	0	0	0	0	0	0.0178	0	0	0	0	0	0	0
[ 652] #CNBRQ408-14|KR248492|BIOUG11224-E07|Ctenosciara_hyalipennis|COI-5P	CNBRQ408-14	ENEA	0.0017	0.0017	0.0017	0	0	0	0	0.0177	0	0	0	0.0177	0	0	0	0	0	0	0	0	0	0	0.018	0	0	0	0	0	0	0	0.0185	0	0	0	0	0	0	0	0	0.0177	0	0	0	0	0	0	0
[ 653] #CNBRQ411-14|KR255375|BIOUG11224-E10|Ctenosciara_hyalipennis|COI-5P	CNBRQ411-14	ENEA	0.0019	0.0019	0.0019	0	0	0	0	0.0175	0	0	0	0.0175	0	0	0	0	0	0	0	0	0	0	0.0175	0	0	0	0	0	0	0	0.0175	0	0	0	0	0	0	0	0	0.0175	0	0	0	0	0	0	0
[ 654] #CNBRQ415-14|KR250449|BIOUG11224-F02|Ctenosciara_hyalipennis|COI-5P	CNBRQ415-14	ENEA	0.0017	0.0017	0.0017	0	0	0	0	0.0177	0	0	0	0.0177	0	0	0	0	0	0	0	0	0	0	0.0179	0	0	0	0	0	0	0	0.0185	0	0	0	0	0	0	0	0	0.0177	0	0	0	0	0	0	0
[ 655] #CNBRQ422-14|KR238682|BIOUG11224-F09|Ctenosciara_hyalipennis|COI-5P	CNBRQ422-14	ENEA	0.0017	0.0017	0.0017	0	0	0	0	0.0177	0	0	0	0.0177	0	0	0	0	0	0	0	0	0	0	0.0179	0	0	0	0	0	0	0	0.0185	0	0	0	0	0	0	0	0	0.0177	0	0	0	0	0	0	0
[ 656] #CNBRQ441-14|KR250579|BIOUG11224-H04|Ctenosciara_hyalipennis|COI-5P	CNBRQ441-14	ENEA	0.0019	0.0019	0.0019	0	0	0	0	0.0171	0	0	0	0.0171	0	0	0	0	0	0	0	0	0	0	0.0174	0	0	0	0	0	0	0	0.018	0	0	0	0	0	0	0	0	0.0171	0	0	0	0	0	0	0
[ 657] #CNBRQ446-14|KR974485|BIOUG11224-H09|Ctenosciara_hyalipennis|COI-5P	CNBRQ446-14	ENEA	0.002	0.002	0.002	0	0	0	0	0.0178	0	0	0	0.0178	0	0	0	0	0	0	0	0	0	0	0.0181	0	0	0	0	0	0	0	0.0188	0	0	0	0	0	0	0	0	0.0178	0	0	0	0	0	0	0
[ 658] #CNBRQ457-14|KR247658|BIOUG11244-A01|Ctenosciara_hyalipennis|COI-5P	CNBRQ457-14	ENEA	0.0019	0.0019	0.0019	0	0	0	0	0.0192	0	0	0	0.0192	0	0	0	0	0	0	0	0	0	0	0.0192	0	0	0	0	0	0	0	0.0192	0	0	0	0	0	0	0	0	0.0192	0	0	0	0	0	0	0
[ 659] #CNBRQ458-14|KR248121|BIOUG11244-A02|Ctenosciara_hyalipennis|COI-5P	CNBRQ458-14	ENEA	0.0017	0.0017	0.0017	0	0	0	0	0.0177	0	0	0	0.0179	0	0	0	0	0	0	0	0	0	0	0.0177	0	0	0	0	0	0	0	0.0184	0	0	0	0	0	0	0	0	0.0181	0	0	0	0	0	0	0
[ 660] #CNBRQ462-14|KR243802|BIOUG11244-A06|Ctenosciara_hyalipennis|COI-5P	CNBRQ462-14	ENEA	0.0017	0.0017	0.0017	0	0	0	0	0.0172	0	0	0	0.0175	0	0	0	0	0	0	0	0	0	0	0.0175	0	0	0	0	0	0	0	0.0184	0	0	0	0	0	0	0	0	0.0177	0	0	0	0	0	0	0
[ 661] #CNBRQ464-14|KR244729|BIOUG11244-A08|Ctenosciara_hyalipennis|COI-5P	CNBRQ464-14	ENEA	0.0017	0.0017	0.0017	0	0	0	0	0.0172	0	0	0	0.0175	0	0	0	0	0	0	0	0	0	0	0.0175	0	0	0	0	0	0	0	0.0184	0	0	0	0	0	0	0	0	0.0177	0	0	0	0	0	0	0
[ 662] #CNBRQ467-14|KR236459|BIOUG11244-A11|Ctenosciara_hyalipennis|COI-5P	CNBRQ467-14	ENEA	0.0019	0.0019	0.0019	0	0	0	0	0.017	0	0	0	0.017	0	0	0	0	0	0	0	0	0	0	0.017	0	0	0	0	0	0	0	0.0175	0	0	0	0	0	0	0	0	0.017	0	0	0	0	0	0	0
[ 663] #CNBRQ468-14|KR251991|BIOUG11244-A12|Ctenosciara_hyalipennis|COI-5P	CNBRQ468-14	ENEA	0.0017	0.0017	0.0017	0	0	0	0	0.0175	0	0	0	0.0178	0	0	0	0	0	0	0	0	0	0	0.0175	0	0	0	0	0	0	0	0.0184	0	0	0	0	0	0	0	0	0.018	0	0	0	0	0	0	0
[ 664] #CNBRQ473-14|KR244696|BIOUG11244-B05|Ctenosciara_hyalipennis|COI-5P	CNBRQ473-14	ENEA	0.0018	0.0018	0.0018	0	0	0	0	0.0166	0	0	0	0.0166	0	0	0	0	0	0	0	0	0	0	0.0169	0	0	0	0	0	0	0	0.0174	0	0	0	0	0	0	0	0	0.0166	0	0	0	0	0	0	0
[ 665] #CNBRQ474-14|KR248651|BIOUG11244-B06|Ctenosciara_hyalipennis|COI-5P	CNBRQ474-14	ENEA	0.0017	0.0017	0.0017	0	0	0	0	0.0172	0	0	0	0.0175	0	0	0	0	0	0	0	0	0	0	0.0175	0	0	0	0	0	0	0	0.0184	0	0	0	0	0	0	0	0	0.0177	0	0	0	0	0	0	0
[ 666] #CNBRQ481-14|KR247615|BIOUG11244-C01|Ctenosciara_hyalipennis|COI-5P	CNBRQ481-14	ENEA	0.0017	0.0017	0.0017	0	0	0	0	0.0175	0	0	0	0.0178	0	0	0	0	0	0	0	0	0	0	0.0175	0	0	0	0	0	0	0	0.0184	0	0	0	0	0	0	0	0	0.018	0	0	0	0	0	0	0
[ 667] #CNBRQ488-14|KR247789|BIOUG11244-C08|Ctenosciara_hyalipennis|COI-5P	CNBRQ488-14	ENEA	0.0018	0.0018	0.0018	0	0	0	0	0.0188	0	0	0	0.0188	0	0	0	0	0	0	0	0	0	0	0.0188	0	0	0	0	0	0	0	0.0194	0	0	0	0	0	0	0	0	0.0188	0	0	0	0	0	0	0
[ 668] #CNBRQ504-14|KR252934|BIOUG11244-D12|Ctenosciara_hyalipennis|COI-5P	CNBRQ504-14	ENEA	0.0017	0.0017	0.0017	0	0	0	0	0.0175	0	0	0	0.0175	0	0	0	0	0	0	0	0	0	0	0.0178	0	0	0	0	0	0	0	0.0184	0	0	0	0	0	0	0	0	0.0177	0	0	0	0	0	0	0
[ 669] #CNBRQ511-14|KR241327|BIOUG11244-E07|Ctenosciara_hyalipennis|COI-5P	CNBRQ511-14	ENEA	0.0017	0.0017	0.0017	0	0	0	0	0.0172	0	0	0	0.0175	0	0	0	0	0	0	0	0	0	0	0.0175	0	0	0	0	0	0	0	0.0184	0	0	0	0	0	0	0	0	0.0177	0	0	0	0	0	0	0
[ 670] #CNBRQ531-14|KR241189|BIOUG11244-G03|Ctenosciara_hyalipennis|COI-5P	CNBRQ531-14	ENEA	0.0017	0.0017	0.0017	0	0	0	0	0.0172	0	0	0	0.0175	0	0	0	0	0	0	0	0	0	0	0.0175	0	0	0	0	0	0	0	0.0184	0	0	0	0	0	0	0	0	0.0177	0	0	0	0	0	0	0
[ 671] #CNBRQ546-14|KR250257|BIOUG11244-H06|Ctenosciara_hyalipennis|COI-5P	CNBRQ546-14	ENEA	0.0018	0.0018	0.0018	0	0	0	0	0.0183	0	0	0	0.0183	0	0	0	0	0	0	0	0	0	0	0.0186	0	0	0	0	0	0	0	0.0192	0	0	0	0	0	0	0	0	0.0183	0	0	0	0	0	0	0
[ 672] #CNBRQ553-14|KR242481|BIOUG11245-A02|Ctenosciara_hyalipennis|COI-5P	CNBRQ553-14	ENEA	0.0018	0.0018	0.0018	0	0	0	0	0.0184	0	0	0	0.0184	0	0	0	0	0	0	0	0	0	0	0.0186	0	0	0	0	0	0	0	0.0192	0	0	0	0	0	0	0	0	0.0184	0	0	0	0	0	0	0
[ 673] #CNBRQ557-14|KR240282|BIOUG11245-A06|Ctenosciara_hyalipennis|COI-5P	CNBRQ557-14	ENEA	0.0191	0.0191	0.0191	0.0176	0.0181	0.0173	0.0177	0	0.0173	0.0173	0.0176	0	0.0186	0.0176	0.0179	0.0173	0.0179	0.0182	0.0173	0.0176	0.0176	0.0176	0	0.0173	0.0173	0.0173	0.0173	0.0176	0.0184	0.0173	0	0.0173	0.0183	0.0173	0.0173	0.0176	0.0176	0.0177	0.0176	0	0.0182	0.0178	0.018	0.0181	0.0182	0.0173	0.0176
[ 674] #CNBRQ561-14|KR239938|BIOUG11245-A10|Ctenosciara_hyalipennis|COI-5P	CNBRQ561-14	ENEA	0.019	0.019	0.019	0.0175	0.018	0.0172	0.0176	0	0.0172	0.0172	0.0175	0	0.0186	0.0175	0.0179	0.0172	0.0179	0.0182	0.0172	0.0176	0.0175	0.0175	0	0.0172	0.0172	0.0172	0.0172	0.0175	0.0184	0.0172	0	0.0172	0.0182	0.0172	0.0172	0.0175	0.0175	0.0176	0.0175	0	0.0182	0.0177	0.018	0.018	0.0182	0.0172	0.0175
[ 675] #CNBRQ565-14|KR235139|BIOUG11245-B02|Ctenosciara_hyalipennis|COI-5P	CNBRQ565-14	ENEA	0.0017	0.0017	0.0017	0	0	0	0	0.0175	0	0	0	0.0178	0	0	0	0	0	0	0	0	0	0	0.0175	0	0	0	0	0	0	0	0.0184	0	0	0	0	0	0	0	0	0.018	0	0	0	0	0	0	0
[ 676] #CNBRQ567-14|KR243415|BIOUG11245-B04|Ctenosciara_hyalipennis|COI-5P	CNBRQ567-14	ENEA	0.0017	0.0017	0.0017	0	0	0	0	0.0172	0	0	0	0.0175	0	0	0	0	0	0	0	0	0	0	0.0175	0	0	0	0	0	0	0	0.0184	0	0	0	0	0	0	0	0	0.0177	0	0	0	0	0	0	0
[ 677] #CNBRQ569-14|KR243239|BIOUG11245-B06|Ctenosciara_hyalipennis|COI-5P	CNBRQ569-14	ENEA	0.0017	0.0017	0.0017	0	0	0	0	0.0155	0	0	0	0.0158	0	0	0	0	0	0	0	0	0	0	0.0158	0	0	0	0	0	0	0	0.0165	0	0	0	0	0	0	0	0	0.016	0	0	0	0	0	0	0
[ 678] #CNBRQ577-14|KR236705|BIOUG11245-C02|Ctenosciara_hyalipennis|COI-5P	CNBRQ577-14	ENEA	0.0018	0.0018	0.0018	0	0	0	0	0.0184	0	0	0	0.0184	0	0	0	0	0	0	0	0	0	0	0.0186	0	0	0	0	0	0	0	0.0192	0	0	0	0	0	0	0	0	0.0184	0	0	0	0	0	0	0
[ 679] #CNBRQ585-14|KR246965|BIOUG11245-C10|Ctenosciara_hyalipennis|COI-5P	CNBRQ585-14	ENEA	0.0017	0.0017	0.0017	0	0	0	0	0.0172	0	0	0	0.0175	0	0	0	0	0	0	0	0	0	0	0.0175	0	0	0	0	0	0	0	0.0184	0	0	0	0	0	0	0	0	0.0177	0	0	0	0	0	0	0
[ 680] #CNBRQ597-14|KR254451|BIOUG11245-D10|Ctenosciara_hyalipennis|COI-5P	CNBRQ597-14	ENEA	0.0017	0.0017	0.0017	0	0	0	0	0.0175	0	0	0	0.0178	0	0	0	0	0	0	0	0	0	0	0.0175	0	0	0	0	0	0	0	0.0184	0	0	0	0	0	0	0	0	0.018	0	0	0	0	0	0	0
[ 681] #CNBRQ599-14|KR246403|BIOUG11245-D12|Ctenosciara_hyalipennis|COI-5P	CNBRQ599-14	ENEA	0.0017	0.0017	0.0017	0	0	0	0	0.0172	0	0	0	0.0175	0	0	0	0	0	0	0	0	0	0	0.0175	0	0	0	0	0	0	0	0.0184	0	0	0	0	0	0	0	0	0.0177	0	0	0	0	0	0	0
[ 682] #CNBRQ601-14|KR257609|BIOUG11245-E02|Ctenosciara_hyalipennis|COI-5P	CNBRQ601-14	ENEA	0.0017	0.0017	0.0017	0	0	0	0	0.0172	0	0	0	0.0175	0	0	0	0	0	0	0	0	0	0	0.0175	0	0	0	0	0	0	0	0.0184	0	0	0	0	0	0	0	0	0.0177	0	0	0	0	0	0	0
[ 683] #CNBRQ602-14|KR250332|BIOUG11245-E03|Ctenosciara_hyalipennis|COI-5P	CNBRQ602-14	ENEA	0.0017	0.0017	0.0017	0	0	0	0	0.0172	0	0	0	0.0175	0	0	0	0	0	0	0	0	0	0	0.0175	0	0	0	0	0	0	0	0.0184	0	0	0	0	0	0	0	0	0.0177	0	0	0	0	0	0	0
[ 684] #CNBRQ610-14|KR241674|BIOUG11245-E11|Ctenosciara_hyalipennis|COI-5P	CNBRQ610-14	ENEA	0.0017	0.0017	0.0017	0	0	0	0	0.0172	0	0	0	0.0175	0	0	0	0	0	0	0	0	0	0	0.0175	0	0	0	0	0	0	0	0.0184	0	0	0	0	0	0	0	0	0.0177	0	0	0	0	0	0	0
[ 685] #CNBRQ619-14|KR239425|BIOUG11245-F08|Ctenosciara_hyalipennis|COI-5P	CNBRQ619-14	ENEA	0.0017	0.0017	0.0017	0	0	0	0	0.0176	0	0	0	0.018	0	0	0	0	0	0	0	0	0	0	0.0176	0	0	0	0	0	0	0	0.0184	0	0	0	0	0	0	0	0	0.0181	0	0	0	0	0	0	0
[ 686] #CNBRQ625-14|KR243595|BIOUG11245-G02|Ctenosciara_hyalipennis|COI-5P	CNBRQ625-14	ENEA	0.0017	0.0017	0.0017	0	0	0	0	0.0172	0	0	0	0.0175	0	0	0	0	0	0	0	0	0	0	0.0175	0	0	0	0	0	0	0	0.0184	0	0	0	0	0	0	0	0	0.0177	0	0	0	0	0	0	0
[ 687] #CNBRQ627-14|KR240968|BIOUG11245-G04|Ctenosciara_hyalipennis|COI-5P	CNBRQ627-14	ENEA	0.0017	0.0017	0.0017	0	0	0	0	0.0172	0	0	0	0.0175	0	0	0	0	0	0	0	0	0	0	0.0175	0	0	0	0	0	0	0	0.0184	0	0	0	0	0	0	0	0	0.0177	0	0	0	0	0	0	0
[ 688] #CNBRQ638-14|KR244330|BIOUG11245-H03|Ctenosciara_hyalipennis|COI-5P	CNBRQ638-14	ENEA	0.0017	0.0017	0.0017	0	0	0	0	0.0172	0	0	0	0.0175	0	0	0	0	0	0	0	0	0	0	0.0175	0	0	0	0	0	0	0	0.0184	0	0	0	0	0	0	0	0	0.0177	0	0	0	0	0	0	0
[ 689] #CNBRQ644-14|KR253955|BIOUG11245-H09|Ctenosciara_hyalipennis|COI-5P	CNBRQ644-14	ENEA	0.0017	0.0017	0.0017	0	0	0	0	0.0172	0	0	0	0.0175	0	0	0	0	0	0	0	0	0	0	0.0175	0	0	0	0	0	0	0	0.0184	0	0	0	0	0	0	0	0	0.0177	0	0	0	0	0	0	0
[ 690] #CNBRQ812-14|KR246513|BIOUG11247-F11|Ctenosciara_hyalipennis|COI-5P	CNBRQ812-14	ENEA	0.0017	0.0017	0.0017	0	0	0	0	0.0175	0	0	0	0.0178	0	0	0	0	0	0	0	0	0	0	0.0175	0	0	0	0	0	0	0	0.0184	0	0	0	0	0	0	0	0	0.018	0	0	0	0	0	0	0
[ 691] #CNBRQ841-14|KR253174|BIOUG11248-A05|Ctenosciara_hyalipennis|COI-5P	CNBRQ841-14	ENEA	0.0017	0.0017	0.0017	0	0	0	0	0.0175	0	0	0	0.0179	0	0	0	0	0	0	0	0	0	0	0.0175	0	0	0	0	0	0	0	0.0184	0	0	0	0	0	0	0	0	0.018	0	0	0	0	0	0	0
[ 692] #CNBRR119-14|KR245514|BIOUG11249-A11|Ctenosciara_hyalipennis|COI-5P	CNBRR119-14	ENEA	0.0019	0.0019	0.0019	0	0	0	0	0.017	0	0	0	0.017	0	0	0	0	0	0	0	0	0	0	0.017	0	0	0	0	0	0	0	0.0175	0	0	0	0	0	0	0	0	0.017	0	0	0	0	0	0	0
[ 693] #CNBRR121-14|KR253512|BIOUG11249-B01|Ctenosciara_hyalipennis|COI-5P	CNBRR121-14	ENEA	0.0017	0.0017	0.0017	0	0	0	0	0.0175	0	0	0	0.0179	0	0	0	0	0	0	0	0	0	0	0.0175	0	0	0	0	0	0	0	0.0184	0	0	0	0	0	0	0	0	0.018	0	0	0	0	0	0	0
[ 694] #CNBRR158-14|KR235273|BIOUG11249-E02|Ctenosciara_hyalipennis|COI-5P	CNBRR158-14	ENEA	0.0017	0.0017	0.0017	0	0	0	0	0.0174	0	0	0	0.0177	0	0	0	0	0	0	0	0	0	0	0.0176	0	0	0	0	0	0	0	0.0185	0	0	0	0	0	0	0	0	0.0179	0	0	0	0	0	0	0
[ 695] #CNBRR162-14|KR236914|BIOUG11249-E06|Ctenosciara_hyalipennis|COI-5P	CNBRR162-14	ENEA	0.0018	0.0018	0.0018	0	0	0	0	0.018	0	0	0	0.018	0	0	0	0	0	0	0	0	0	0	0.0183	0	0	0	0	0	0	0	0.0188	0	0	0	0	0	0	0	0	0.018	0	0	0	0	0	0	0
[ 696] #CNBRR179-14|KR244920|BIOUG11249-F11|Ctenosciara_hyalipennis|COI-5P	CNBRR179-14	ENEA	0.0018	0.0018	0.0018	0	0	0	0	0.0183	0	0	0	0.0183	0	0	0	0	0	0	0	0	0	0	0.0186	0	0	0	0	0	0	0	0.0192	0	0	0	0	0	0	0	0	0.0183	0	0	0	0	0	0	0
[ 697] #CNBRR181-14|KR241343|BIOUG11249-G01|Ctenosciara_hyalipennis|COI-5P	CNBRR181-14	ENEA	0.0193	0.0193	0.0193	0.0175	0.018	0.0175	0.0176	0	0.0175	0.0175	0.0175	0	0.0186	0.0175	0.0179	0.0175	0.0179	0.0182	0.0175	0.0179	0.0175	0.0175	0	0.0175	0.0175	0.0175	0.0175	0.0176	0.0184	0.0175	0	0.0175	0.0182	0.0175	0.0175	0.0179	0.0179	0.0176	0.0175	0	0.0182	0.0177	0.018	0.018	0.0182	0.0175	0.0175
[ 698] #CNBRR190-14|KR249807|BIOUG11249-G10|Ctenosciara_hyalipennis|COI-5P	CNBRR190-14	ENEA	0.0017	0.0017	0.0017	0	0	0	0	0.0173	0	0	0	0.0176	0	0	0	0	0	0	0	0	0	0	0.0175	0	0	0	0	0	0	0	0.0184	0	0	0	0	0	0	0	0	0.0177	0	0	0	0	0	0	0
[ 699] #CNBRR262-14|KR236535|BIOUG11286-B11|Ctenosciara_hyalipennis|COI-5P	CNBRR262-14	ENEA	0.0017	0.0017	0.0017	0	0	0	0	0.0173	0	0	0	0.0176	0	0	0	0	0	0	0	0	0	0	0.0175	0	0	0	0	0	0	0	0.0184	0	0	0	0	0	0	0	0	0.0177	0	0	0	0	0	0	0
[ 700] #CNBRR298-14|KR251071|BIOUG11286-E11|Ctenosciara_hyalipennis|COI-5P	CNBRR298-14	ENEA	0.0017	0.0017	0.0017	0	0	0	0	0.0175	0	0	0	0.0176	0	0	0	0	0	0	0	0	0	0	0.0177	0	0	0	0	0	0	0	0.0184	0	0	0	0	0	0	0	0	0.0177	0	0	0	0	0	0	0
[ 701] #CNBRR300-14|KR249495|BIOUG11286-F01|Ctenosciara_hyalipennis|COI-5P	CNBRR300-14	ENEA	0.0018	0.0018	0.0018	0	0	0	0	0.018	0	0	0	0.018	0	0	0	0	0	0	0	0	0	0	0.018	0	0	0	0	0	0	0	0.0184	0	0	0	0	0	0	0	0	0.0181	0	0	0	0	0	0	0
[ 702] #CNBRS070-14|KR255613|BIOUG11288-G05|Ctenosciara_hyalipennis|COI-5P	CNBRS070-14	ENEA	0.0019	0.0019	0.0019	0	0	0	0	0.017	0	0	0	0.017	0	0	0	0	0	0	0	0	0	0	0.017	0	0	0	0	0	0	0	0.0175	0	0	0	0	0	0	0	0	0.017	0	0	0	0	0	0	0
[ 703] #CNBRS076-14|KR240371|BIOUG11288-G11|Ctenosciara_hyalipennis|COI-5P	CNBRS076-14	ENEA	0.0018	0.0018	0.0018	0	0	0	0	0.0182	0	0	0	0.0186	0	0	0	0	0	0	0	0	0	0	0.0182	0	0	0	0	0	0	0	0.0186	0	0	0	0	0	0	0	0	0.0187	0	0	0	0	0	0	0
[ 704] #CNBRS084-14|KR234889|BIOUG11288-H07|Ctenosciara_hyalipennis|COI-5P	CNBRS084-14	ENEA	0.0016	0.0016	0.0016	0	0	0	0	0.0172	0	0	0	0.0175	0	0	0	0	0	0	0	0	0	0	0.0175	0	0	0	0	0	0	0	0.0184	0	0	0	0	0	0	0	0	0.0177	0	0	0	0	0	0	0
[ 705] #CNBRS110-14|KR256950|BIOUG11289-B10|Ctenosciara_hyalipennis|COI-5P	CNBRS110-14	ENEA	0.0017	0.0017	0.0017	0	0	0	0	0.0175	0	0	0	0.0179	0	0	0	0	0	0	0	0	0	0	0.0175	0	0	0	0	0	0	0	0.0184	0	0	0	0	0	0	0	0	0.018	0	0	0	0	0	0	0
[ 706] #CNBRS118-14|KR258564|BIOUG11289-C06|Ctenosciara_hyalipennis|COI-5P	CNBRS118-14	ENEA	0.0016	0.0016	0.0016	0	0	0	0	0.0172	0	0	0	0.0175	0	0	0	0	0	0	0	0	0	0	0.0175	0	0	0	0	0	0	0	0.0184	0	0	0	0	0	0	0	0	0.0177	0	0	0	0	0	0	0
[ 707] #CNBRS121-14|KR253741|BIOUG11289-C09|Ctenosciara_hyalipennis|COI-5P	CNBRS121-14	ENEA	0.0019	0.0019	0.0019	0	0	0	0	0.0173	0	0	0	0.0173	0	0	0	0	0	0	0	0	0	0	0.0173	0	0	0	0	0	0	0	0.0178	0	0	0	0	0	0	0	0	0.0173	0	0	0	0	0	0	0
[ 708] #CNBRS124-14|KR237671|BIOUG11289-C12|Ctenosciara_hyalipennis|COI-5P	CNBRS124-14	ENEA	0.0016	0.0016	0.0016	0	0	0	0	0.0172	0	0	0	0.0175	0	0	0	0	0	0	0	0	0	0	0.0175	0	0	0	0	0	0	0	0.0184	0	0	0	0	0	0	0	0	0.0177	0	0	0	0	0	0	0
[ 709] #CNFDB074-14|KR243221|BIOUG10289-C03|Ctenosciara_hyalipennis|COI-5P	CNFDB074-14	ENEA	0	0	0	0.0018	0.0019	0.0018	0.0018	0.0199	0.0018	0.0018	0.0018	0.0199	0.0019	0.0018	0.0018	0.0018	0.0018	0.0019	0.0018	0.0018	0.0018	0.0018	0.0202	0.0018	0.0018	0.0018	0.0018	0.0018	0.0019	0.0018	0.0209	0.0018	0.0019	0.0018	0.0018	0.0018	0.0018	0.0018	0.0018	0.0199	0.0019	0.0018	0.0018	0.0019	0.0019	0.0018	0.0018
[ 710] #CNFDB143-14|KR257754|BIOUG10290-A01|Ctenosciara_hyalipennis|COI-5P	CNFDB143-14	ENEA	0	0	0	0.0017	0.0018	0.0017	0.0017	0.019	0.0017	0.0017	0.0017	0.0194	0.0018	0.0017	0.0018	0.0017	0.0018	0.0018	0.0017	0.0017	0.0017	0.0017	0.0193	0.0017	0.0017	0.0017	0.0017	0.0017	0.0018	0.0017	0.0202	0.0017	0.0018	0.0017	0.0017	0.0017	0.0017	0.0017	0.0017	0.0195	0.0018	0.0017	0.0018	0.0018	0.0018	0.0017	0.0017
[ 711] #CNFDB186-14|KR242060|BIOUG10290-D08|Ctenosciara_hyalipennis|COI-5P	CNFDB186-14	ENEA	0	0	0	0.0017	0.0018	0.0017	0.0017	0.0189	0.0017	0.0017	0.0017	0.0194	0.0018	0.0017	0.0018	0.0017	0.0018	0.0018	0.0017	0.0017	0.0017	0.0017	0.0193	0.0017	0.0017	0.0017	0.0017	0.0017	0.0018	0.0017	0.0202	0.0017	0.0018	0.0017	0.0017	0.0017	0.0017	0.0017	0.0017	0.0195	0.0018	0.0017	0.0018	0.0018	0.0018	0.0017	0.0017
[ 712] #CNFDC133-14|KR237548|BIOUG10292-C12|Ctenosciara_hyalipennis|COI-5P	CNFDC133-14	ENEA	0	0	0	0.0018	0.0019	0.0018	0.0018	0.0202	0.0018	0.0018	0.0018	0.0202	0.0019	0.0018	0.0018	0.0018	0.0018	0.0019	0.0018	0.0018	0.0018	0.0018	0.0205	0.0018	0.0018	0.0018	0.0018	0.0018	0.0019	0.0018	0.0211	0.0018	0.0019	0.0018	0.0018	0.0018	0.0018	0.0018	0.0018	0.0202	0.0019	0.0018	0.0018	0.0019	0.0019	0.0018	0.0018
[ 713] #CNFDC138-14|KR251157|BIOUG10292-D05|Ctenosciara_hyalipennis|COI-5P	CNFDC138-14	ENEA	0	0	0	0.0018	0.0018	0.0017	0.0018	0.0194	0.0017	0.0017	0.0018	0.0194	0.0018	0.0018	0.0018	0.0017	0.0018	0.0018	0.0017	0.0017	0.0018	0.0018	0.0197	0.0017	0.0017	0.0017	0.0017	0.0018	0.0018	0.0017	0.0203	0.0017	0.0018	0.0017	0.0017	0.0017	0.0017	0.0018	0.0018	0.0195	0.0018	0.0018	0.0018	0.0018	0.0018	0.0017	0.0018
[ 714] #CNFDC195-14|KR240221|BIOUG10293-A03|Ctenosciara_hyalipennis|COI-5P	CNFDC195-14	ENEA	0	0	0	0.0017	0.0018	0.0017	0.0017	0.0189	0.0017	0.0017	0.0017	0.0193	0.0018	0.0017	0.0018	0.0017	0.0018	0.0018	0.0017	0.0017	0.0017	0.0017	0.0193	0.0017	0.0017	0.0017	0.0017	0.0017	0.0018	0.0017	0.0202	0.0017	0.0018	0.0017	0.0017	0.0017	0.0017	0.0017	0.0017	0.0195	0.0018	0.0017	0.0018	0.0018	0.0018	0.0017	0.0017
[ 715] #CNFDD064-14|KR246875|BIOUG10424-B03|Ctenosciara_hyalipennis|COI-5P	CNFDD064-14	ENEA	0	0	0	0.0018	0.0019	0.0018	0.0018	0.0202	0.0018	0.0018	0.0018	0.0202	0.0019	0.0018	0.0018	0.0018	0.0018	0.0019	0.0018	0.0018	0.0018	0.0018	0.0205	0.0018	0.0018	0.0018	0.0018	0.0018	0.0019	0.0018	0.0211	0.0018	0.0019	0.0018	0.0018	0.0018	0.0018	0.0018	0.0018	0.0202	0.0019	0.0018	0.0018	0.0019	0.0019	0.0018	0.0018
[ 716] #CNFDI092-14|KR246021|BIOUG11084-A10|Ctenosciara_hyalipennis|COI-5P	CNFDI092-14	ENEA	0	0	0	0.0017	0.0018	0.0017	0.0017	0.0189	0.0017	0.0017	0.0017	0.0193	0.0018	0.0017	0.0018	0.0017	0.0018	0.0018	0.0017	0.0017	0.0017	0.0017	0.0193	0.0017	0.0017	0.0017	0.0017	0.0017	0.0018	0.0017	0.0202	0.0017	0.0018	0.0017	0.0017	0.0017	0.0017	0.0017	0.0017	0.0195	0.0018	0.0017	0.0018	0.0018	0.0018	0.0017	0.0017
[ 717] #CNFDL371-14|KR235320|BIOUG11174-H06|Ctenosciara_hyalipennis|COI-5P	CNFDL371-14	ENEA	0	0	0	0.0018	0.0018	0.0018	0.0018	0.0199	0.0018	0.0018	0.0018	0.0199	0.0018	0.0018	0.0018	0.0018	0.0018	0.0018	0.0018	0.0018	0.0018	0.0018	0.0199	0.0018	0.0018	0.0018	0.0018	0.0018	0.0018	0.0018	0.0204	0.0018	0.0018	0.0018	0.0018	0.0018	0.0018	0.0018	0.0018	0.02	0.0018	0.0018	0.0018	0.0018	0.0018	0.0018	0.0018
[ 718] #CNFDL459-14|KR246830|BIOUG11175-G11|Ctenosciara_hyalipennis|COI-5P	CNFDL459-14	ENEA	0	0	0	0.0017	0.0018	0.0017	0.0017	0.0189	0.0017	0.0017	0.0017	0.0193	0.0018	0.0017	0.0018	0.0017	0.0018	0.0018	0.0017	0.0017	0.0017	0.0017	0.0193	0.0017	0.0017	0.0017	0.0017	0.0017	0.0018	0.0017	0.0202	0.0017	0.0018	0.0017	0.0017	0.0017	0.0017	0.0017	0.0017	0.0195	0.0018	0.0017	0.0018	0.0018	0.0018	0.0017	0.0017
[ 719] #CNFDL467-14|KR257760|BIOUG11175-H07|Ctenosciara_hyalipennis|COI-5P	CNFDL467-14	ENEA	0	0	0	0.0017	0.0018	0.0017	0.0017	0.0193	0.0017	0.0017	0.0017	0.0196	0.0018	0.0017	0.0018	0.0017	0.0018	0.0018	0.0017	0.0018	0.0017	0.0017	0.0193	0.0017	0.0017	0.0017	0.0017	0.0017	0.0018	0.0017	0.0202	0.0017	0.0018	0.0017	0.0017	0.0018	0.0018	0.0017	0.0017	0.0198	0.0018	0.0017	0.0018	0.0018	0.0018	0.0017	0.0017
[ 720] #CNFDL502-14|KR242957|BIOUG11255-C05|Ctenosciara_hyalipennis|COI-5P	CNFDL502-14	ENEA	0	0	0	0.0017	0.0018	0.0017	0.0017	0.0193	0.0017	0.0017	0.0017	0.0196	0.0018	0.0017	0.0018	0.0017	0.0018	0.0018	0.0017	0.0018	0.0017	0.0017	0.0193	0.0017	0.0017	0.0017	0.0017	0.0017	0.0018	0.0017	0.0202	0.0017	0.0018	0.0017	0.0017	0.0018	0.0018	0.0017	0.0017	0.0198	0.0018	0.0017	0.0018	0.0018	0.0018	0.0017	0.0017
[ 721] #CNFDL508-14|KR245111|BIOUG11255-C11|Ctenosciara_hyalipennis|COI-5P	CNFDL508-14	ENEA	0	0	0	0.0017	0.0018	0.0017	0.0017	0.0192	0.0017	0.0017	0.0017	0.0196	0.0018	0.0017	0.0018	0.0017	0.0018	0.0018	0.0017	0.0018	0.0017	0.0017	0.0193	0.0017	0.0017	0.0017	0.0017	0.0017	0.0018	0.0017	0.0202	0.0017	0.0018	0.0017	0.0017	0.0018	0.0018	0.0017	0.0017	0.0198	0.0018	0.0017	0.0018	0.0018	0.0018	0.0017	0.0017
[ 722] #CNFDL525-14|KR235653|BIOUG11255-E04|Ctenosciara_hyalipennis|COI-5P	CNFDL525-14	ENEA	0	0	0	0.0019	0.0019	0.0019	0.0019	0.0197	0.0019	0.0019	0.0019	0.0197	0.0019	0.0019	0.0019	0.0019	0.0019	0.0019	0.0019	0.0019	0.0019	0.0019	0.0197	0.0019	0.0019	0.0019	0.0019	0.0019	0.0019	0.0019	0.0197	0.0019	0.0019	0.0019	0.0019	0.0019	0.0019	0.0019	0.0019	0.0197	0.0019	0.0019	0.0019	0.0019	0.0019	0.0019	0.0019
[ 723] #CNGAA236-15|KR973570|BIOUG18981-F03|Ctenosciara_hyalipennis|COI-5P	CNGAA236-15	WNEA	0.019	0.019	0.019	0.0175	0.018	0.0173	0.0176	0.0017	0.0173	0.0173	0.0175	0.0017	0.0186	0.0175	0.0179	0.0173	0.0178	0.0181	0.0173	0.0176	0.0175	0.0175	0.0017	0.0173	0.0173	0.0173	0.0173	0.0175	0.0183	0.0173	0.0018	0.0173	0.0182	0.0173	0.0173	0.0176	0.0176	0.0176	0.0175	0.0017	0.0181	0.0176	0.0179	0.018	0.0181	0.0173	0.0175
[ 724] #CNGAB102-15|KR974264|BIOUG19266-F05|Ctenosciara_hyalipennis|COI-5P	CNGAB102-15	WNEA	0.0198	0.0198	0.0198	0.0182	0.0188	0.018	0.0184	0.0018	0.018	0.018	0.0182	0.0018	0.019	0.0182	0.0183	0.018	0.0183	0.019	0.018	0.018	0.0183	0.0182	0.0018	0.018	0.018	0.018	0.018	0.0182	0.0188	0.018	0.0019	0.018	0.019	0.018	0.018	0.018	0.018	0.0184	0.0182	0.0018	0.019	0.0184	0.0182	0.0188	0.019	0.018	0.0182
[ 725] #CNGAB337-15|KR976555|BIOUG19269-B03|Ctenosciara_hyalipennis|COI-5P	CNGAB337-15	WNEA	0.0209	0.0209	0.0209	0.019	0.0193	0.019	0.019	0.0019	0.019	0.019	0.019	0.0019	0.0194	0.019	0.019	0.019	0.019	0.0194	0.019	0.019	0.019	0.019	0.0019	0.019	0.019	0.019	0.019	0.019	0.0193	0.019	0.0019	0.019	0.0195	0.019	0.019	0.019	0.019	0.019	0.019	0.0019	0.0194	0.019	0.019	0.0193	0.0194	0.019	0.019
[ 726] #CNGAB366-15|KR977853|BIOUG19269-D08|Ctenosciara_hyalipennis|COI-5P	CNGAB366-15	WNEA	0.019	0.019	0.019	0.0175	0.018	0.0173	0.0176	0.0017	0.0173	0.0173	0.0175	0.0017	0.0186	0.0175	0.0179	0.0173	0.0178	0.0181	0.0173	0.0176	0.0175	0.0175	0.0017	0.0173	0.0173	0.0173	0.0173	0.0175	0.0183	0.0173	0.0018	0.0173	0.0182	0.0173	0.0173	0.0176	0.0176	0.0176	0.0175	0.0017	0.0181	0.0176	0.0179	0.018	0.0181	0.0173	0.0175
[ 727] #CNGAB392-15|KR975820|BIOUG19269-F10|Ctenosciara_hyalipennis|COI-5P	CNGAB392-15	WNEA	0.0189	0.0189	0.0189	0.0175	0.0179	0.0173	0.0176	0.0017	0.0173	0.0173	0.0175	0.0017	0.0186	0.0175	0.0179	0.0173	0.0178	0.0181	0.0173	0.0176	0.0175	0.0175	0.0017	0.0173	0.0173	0.0172	0.0173	0.0175	0.0183	0.0173	0.0018	0.0172	0.0182	0.0173	0.0172	0.0176	0.0176	0.0176	0.0175	0.0017	0.0181	0.0176	0.0179	0.0179	0.0181	0.0173	0.0175
[ 728] #CNGAB435-15|KR976255|BIOUG19341-B06|Ctenosciara_hyalipennis|COI-5P	CNGAB435-15	WNEA	0.0197	0.0197	0.0197	0.0179	0.0184	0.0179	0.018	0.0018	0.0179	0.0179	0.0179	0.0018	0.0186	0.0179	0.0179	0.0179	0.0179	0.0185	0.0179	0.0179	0.0179	0.0179	0.0018	0.0179	0.0179	0.0179	0.0179	0.0179	0.0184	0.0179	0.0018	0.0179	0.0186	0.0179	0.0179	0.0179	0.0179	0.018	0.0179	0.0018	0.0185	0.018	0.018	0.0184	0.0185	0.0179	0.0179
[ 729] #CNGAB450-15|KR977525|BIOUG19341-C09|Ctenosciara_hyalipennis|COI-5P	CNGAB450-15	WNEA	0.019	0.019	0.019	0.0175	0.018	0.0173	0.0176	0.0017	0.0173	0.0173	0.0175	0.0017	0.0186	0.0175	0.0179	0.0173	0.0178	0.0181	0.0173	0.0176	0.0175	0.0175	0.0017	0.0173	0.0173	0.0173	0.0173	0.0175	0.0183	0.0173	0.0018	0.0173	0.0182	0.0173	0.0173	0.0176	0.0176	0.0176	0.0175	0.0017	0.0181	0.0176	0.0179	0.018	0.0181	0.0173	0.0175
[ 730] #CNGAB461-15|KR974493|BIOUG19341-D08|Ctenosciara_hyalipennis|COI-5P	CNGAB461-15	WNEA	0.0197	0.0197	0.0197	0.0179	0.0184	0.0179	0.018	0.0018	0.0179	0.0179	0.0179	0.0018	0.0186	0.0179	0.0179	0.0179	0.0179	0.0185	0.0179	0.0179	0.0179	0.0179	0.0018	0.0179	0.0179	0.0179	0.0179	0.0179	0.0184	0.0179	0.0018	0.0179	0.0186	0.0179	0.0179	0.0179	0.0179	0.018	0.0179	0.0018	0.0185	0.018	0.018	0.0184	0.0185	0.0179	0.0179
[ 731] #CNGAB492-15|KR973775|BIOUG19341-G03|Ctenosciara_hyalipennis|COI-5P	CNGAB492-15	WNEA	0.0191	0.0191	0.0191	0.0176	0.0181	0.0173	0.0177	0.0017	0.0173	0.0173	0.0176	0.0017	0.0186	0.0176	0.0179	0.0173	0.0178	0.0182	0.0173	0.0176	0.0176	0.0176	0.0017	0.0173	0.0173	0.0173	0.0173	0.0176	0.0183	0.0173	0.0018	0.0173	0.0183	0.0173	0.0173	0.0176	0.0176	0.0177	0.0176	0.0017	0.0182	0.0177	0.0179	0.0181	0.0182	0.0173	0.0176
[ 732] #CNGAB498-15|KR974156|BIOUG19341-G09|Ctenosciara_hyalipennis|COI-5P	CNGAB498-15	WNEA	0.019	0.019	0.019	0.0175	0.018	0.0173	0.0176	0.0017	0.0173	0.0173	0.0175	0.0017	0.0186	0.0175	0.0179	0.0173	0.0178	0.0181	0.0173	0.0176	0.0175	0.0175	0.0017	0.0173	0.0173	0.0173	0.0173	0.0175	0.0183	0.0173	0.0018	0.0173	0.0182	0.0173	0.0173	0.0176	0.0176	0.0176	0.0175	0.0017	0.0181	0.0176	0.0179	0.018	0.0181	0.0173	0.0175
[ 733] #CNGAB500-15|KR974962|BIOUG19341-G11|Ctenosciara_hyalipennis|COI-5P	CNGAB500-15	WNEA	0.0194	0.0194	0.0194	0.0178	0.0184	0.0176	0.018	0.0017	0.0176	0.0176	0.0178	0.0017	0.0186	0.0178	0.0179	0.0176	0.0179	0.0185	0.0176	0.0176	0.0179	0.0178	0.0018	0.0176	0.0176	0.0176	0.0176	0.0178	0.0184	0.0176	0.0018	0.0176	0.0186	0.0176	0.0176	0.0176	0.0176	0.018	0.0178	0.0017	0.0185	0.018	0.0179	0.0184	0.0185	0.0176	0.0178
[ 734] #CNGAB660-15|KR975475|BIOUG19343-E05|Ctenosciara_hyalipennis|COI-5P	CNGAB660-15	WNEA	0.0189	0.0189	0.0189	0.0175	0.0179	0.0173	0.0176	0.0017	0.0173	0.0173	0.0175	0.0017	0.0186	0.0175	0.0179	0.0173	0.0178	0.0181	0.0173	0.0176	0.0175	0.0175	0.0017	0.0173	0.0173	0.0172	0.0173	0.0175	0.0183	0.0173	0.0018	0.0172	0.0182	0.0173	0.0172	0.0176	0.0176	0.0176	0.0175	0.0017	0.0181	0.0176	0.0179	0.0179	0.0181	0.0173	0.0175
[ 735] #CNGAB665-15|KR976636|BIOUG19343-E10|Ctenosciara_hyalipennis|COI-5P	CNGAB665-15	WNEA	0.019	0.019	0.019	0.0175	0.018	0.0173	0.0176	0.0017	0.0173	0.0173	0.0175	0.0017	0.0186	0.0175	0.0179	0.0173	0.0178	0.0181	0.0173	0.0176	0.0175	0.0175	0.0017	0.0173	0.0173	0.0173	0.0173	0.0175	0.0183	0.0173	0.0018	0.0173	0.0182	0.0173	0.0173	0.0176	0.0176	0.0176	0.0175	0.0017	0.0181	0.0176	0.0179	0.018	0.0181	0.0173	0.0175
[ 736] #CNGAB671-15|KR975104|BIOUG19343-F04|Ctenosciara_hyalipennis|COI-5P	CNGAB671-15	WNEA	0.0189	0.0189	0.0189	0.0175	0.0179	0.0173	0.0176	0.0017	0.0173	0.0173	0.0175	0.0017	0.0186	0.0175	0.0179	0.0173	0.0178	0.0181	0.0173	0.0176	0.0175	0.0175	0.0017	0.0173	0.0173	0.0172	0.0173	0.0175	0.0183	0.0173	0.0018	0.0172	0.0182	0.0173	0.0172	0.0176	0.0176	0.0176	0.0175	0.0017	0.0181	0.0176	0.0179	0.0179	0.0181	0.0173	0.0175
[ 737] #CNGAB684-15|KR975239|BIOUG19343-G05|Ctenosciara_hyalipennis|COI-5P	CNGAB684-15	WNEA	0.0189	0.0189	0.0189	0.0175	0.0179	0.0173	0.0176	0.0017	0.0173	0.0173	0.0175	0.0017	0.0186	0.0175	0.0179	0.0173	0.0178	0.0181	0.0173	0.0176	0.0175	0.0175	0.0017	0.0173	0.0173	0.0172	0.0173	0.0175	0.0183	0.0173	0.0018	0.0172	0.0182	0.0173	0.0172	0.0176	0.0176	0.0176	0.0175	0.0017	0.0181	0.0176	0.0179	0.0179	0.0181	0.0173	0.0175
[ 738] #CNGAC308-15|KR975607|BIOUG19461-G06|Ctenosciara_hyalipennis|COI-5P	CNGAC308-15	WNEA	0.0189	0.0189	0.0189	0.0175	0.0179	0.0173	0.0176	0.0017	0.0173	0.0173	0.0175	0.0017	0.0186	0.0175	0.0179	0.0173	0.0178	0.0181	0.0173	0.0176	0.0175	0.0175	0.0017	0.0173	0.0173	0.0172	0.0173	0.0175	0.0183	0.0173	0.0018	0.0172	0.0182	0.0173	0.0172	0.0176	0.0176	0.0176	0.0175	0.0017	0.0181	0.0176	0.0179	0.0179	0.0181	0.0173	0.0175
[ 739] #CNGAC528-15|KR977835|BIOUG19462-D12|Ctenosciara_hyalipennis|COI-5P	CNGAC528-15	WNEA	0.019	0.019	0.019	0.0175	0.018	0.0173	0.0176	0.0017	0.0173	0.0173	0.0175	0.0017	0.0186	0.0175	0.0179	0.0173	0.0178	0.0181	0.0173	0.0176	0.0175	0.0175	0.0017	0.0173	0.0173	0.0173	0.0173	0.0175	0.0183	0.0173	0.0018	0.0173	0.0182	0.0173	0.0173	0.0176	0.0176	0.0176	0.0175	0.0017	0.0181	0.0176	0.0179	0.018	0.0181	0.0173	0.0175
[ 740] #CNGAC623-15|KR974354|BIOUG19463-D12|Ctenosciara_hyalipennis|COI-5P	CNGAC623-15	WNEA	0.019	0.019	0.019	0.0175	0.018	0.0173	0.0176	0.0017	0.0173	0.0173	0.0175	0.0017	0.0186	0.0175	0.0179	0.0173	0.0178	0.0181	0.0173	0.0176	0.0175	0.0175	0.0017	0.0173	0.0173	0.0173	0.0173	0.0175	0.0183	0.0173	0.0018	0.0173	0.0182	0.0173	0.0173	0.0176	0.0176	0.0176	0.0175	0.0017	0.0181	0.0176	0.0179	0.018	0.0181	0.0173	0.0175
[ 741] #CNGAC624-15|KR973593|BIOUG19463-E01|Ctenosciara_hyalipennis|COI-5P	CNGAC624-15	WNEA	0.0173	0.0173	0.0173	0.0192	0.0198	0.019	0.0194	0.0034	0.019	0.019	0.0192	0.0035	0.0205	0.0192	0.0197	0.019	0.0197	0.02	0.019	0.0194	0.0193	0.0192	0.0035	0.019	0.019	0.019	0.019	0.0193	0.0202	0.019	0.0036	0.019	0.02	0.019	0.019	0.0193	0.0193	0.0194	0.0192	0.0035	0.02	0.0194	0.0198	0.0198	0.02	0.019	0.0192
[ 742] #CNGAH199-15|KR976812|BIOUG19907-E02|Ctenosciara_hyalipennis|COI-5P	CNGAH199-15	WNEA	0.019	0.019	0.019	0.0175	0.018	0.0173	0.0176	0.0017	0.0173	0.0173	0.0175	0.0017	0.0186	0.0175	0.0179	0.0173	0.0178	0.0181	0.0173	0.0176	0.0175	0.0175	0.0017	0.0173	0.0173	0.0173	0.0173	0.0175	0.0183	0.0173	0.0018	0.0173	0.0182	0.0173	0.0173	0.0176	0.0176	0.0176	0.0175	0.0017	0.0181	0.0176	0.0179	0.018	0.0181	0.0173	0.0175
[ 743] #CNGAI201-15|KR977314|BIOUG20010-G08|Ctenosciara_hyalipennis|COI-5P	CNGAI201-15	WNEA	0	0	0	0.0017	0.0018	0.0017	0.0017	0.0189	0.0017	0.0017	0.0017	0.0194	0.0018	0.0017	0.0018	0.0017	0.0018	0.0018	0.0017	0.0017	0.0017	0.0017	0.0193	0.0017	0.0017	0.0017	0.0017	0.0017	0.0018	0.0017	0.0202	0.0017	0.0018	0.0017	0.0017	0.0017	0.0017	0.0017	0.0017	0.0195	0.0018	0.0017	0.0018	0.0018	0.0018	0.0017	0.0017
[ 744] #CNGBE460-14|KR241346|BIOUG09830-C05|Ctenosciara_hyalipennis|COI-5P	CNGBE460-14	ENEA	0.019	0.019	0.019	0.0175	0.018	0.0172	0.0176	0	0.0172	0.0172	0.0175	0	0.0186	0.0175	0.0179	0.0172	0.0179	0.0182	0.0172	0.0176	0.0175	0.0175	0	0.0172	0.0172	0.0172	0.0172	0.0175	0.0184	0.0172	0	0.0172	0.0182	0.0172	0.0172	0.0175	0.0175	0.0176	0.0175	0	0.0182	0.0177	0.018	0.018	0.0182	0.0172	0.0175
[ 745] #CNGUA106-14|KR475925|BIOUG17679-A11|Ctenosciara_hyalipennis|COI-5P	CNGUA106-14	WNEA	0.019	0.019	0.019	0.0175	0.018	0.0173	0.0176	0.0017	0.0173	0.0173	0.0175	0.0017	0.0186	0.0175	0.0179	0.0173	0.0178	0.0181	0.0173	0.0176	0.0175	0.0175	0.0017	0.0173	0.0173	0.0173	0.0173	0.0175	0.0183	0.0173	0.0018	0.0173	0.0182	0.0173	0.0173	0.0176	0.0176	0.0176	0.0175	0.0017	0.0181	0.0176	0.0179	0.018	0.0181	0.0173	0.0175
[ 746] #CNGUA217-14|KR473158|BIOUG17680-C03|Ctenosciara_hyalipennis|COI-5P	CNGUA217-14	WNEA	0	0	0	0.0017	0.0018	0.0017	0.0017	0.0189	0.0017	0.0017	0.0017	0.0194	0.0018	0.0017	0.0018	0.0017	0.0018	0.0018	0.0017	0.0017	0.0017	0.0017	0.0193	0.0017	0.0017	0.0017	0.0017	0.0017	0.0018	0.0017	0.0202	0.0017	0.0018	0.0017	0.0017	0.0017	0.0017	0.0017	0.0017	0.0195	0.0018	0.0017	0.0018	0.0018	0.0018	0.0017	0.0017
[ 747] #CNGUB030-14|KR473631|BIOUG17752-D07|Ctenosciara_hyalipennis|COI-5P	CNGUB030-14	WNEA	0.019	0.019	0.019	0.0175	0.018	0.0173	0.0176	0.0017	0.0173	0.0173	0.0175	0.0017	0.0186	0.0175	0.0179	0.0173	0.0178	0.0181	0.0173	0.0176	0.0175	0.0175	0.0017	0.0173	0.0173	0.0173	0.0173	0.0175	0.0183	0.0173	0.0018	0.0173	0.0182	0.0173	0.0173	0.0176	0.0176	0.0176	0.0175	0.0017	0.0181	0.0176	0.0179	0.018	0.0181	0.0173	0.0175
[ 748] #CNGUB061-14|KR474811|BIOUG17752-G02|Ctenosciara_hyalipennis|COI-5P	CNGUB061-14	WNEA	0.019	0.019	0.019	0.0175	0.018	0.0173	0.0176	0.0017	0.0173	0.0173	0.0175	0.0017	0.0186	0.0175	0.0179	0.0173	0.0178	0.0181	0.0173	0.0176	0.0175	0.0175	0.0017	0.0173	0.0173	0.0173	0.0173	0.0175	0.0183	0.0173	0.0018	0.0173	0.0182	0.0173	0.0173	0.0176	0.0176	0.0176	0.0175	0.0017	0.0181	0.0176	0.0179	0.018	0.0181	0.0173	0.0175
[ 749] #CNGUB234-14|KR474463|BIOUG17918-H09|Ctenosciara_hyalipennis|COI-5P	CNGUB234-14	WNEA	0	0	0	0.0018	0.0019	0.0018	0.0018	0.0202	0.0018	0.0018	0.0018	0.0202	0.0019	0.0018	0.0018	0.0018	0.0018	0.0019	0.0018	0.0018	0.0018	0.0018	0.0205	0.0018	0.0018	0.0018	0.0018	0.0018	0.0019	0.0018	0.0211	0.0018	0.0019	0.0018	0.0018	0.0018	0.0018	0.0018	0.0018	0.0202	0.0019	0.0018	0.0018	0.0019	0.0019	0.0018	0.0018
[ 750] #CNGUB274-14|KR466005|BIOUG17919-D02|Ctenosciara_hyalipennis|COI-5P	CNGUB274-14	WNEA	0.019	0.019	0.019	0.0175	0.018	0.0173	0.0176	0.0017	0.0173	0.0173	0.0175	0.0017	0.0186	0.0175	0.0179	0.0173	0.0178	0.0181	0.0173	0.0176	0.0175	0.0175	0.0017	0.0173	0.0173	0.0173	0.0173	0.0175	0.0183	0.0173	0.0018	0.0173	0.0182	0.0173	0.0173	0.0176	0.0176	0.0176	0.0175	0.0017	0.0181	0.0176	0.0179	0.018	0.0181	0.0173	0.0175
[ 751] #CNGUB302-14|KR469730|BIOUG17919-F06|Ctenosciara_hyalipennis|COI-5P	CNGUB302-14	WNEA	0.019	0.019	0.019	0.0175	0.018	0.0173	0.0176	0.0017	0.0173	0.0173	0.0175	0.0017	0.0186	0.0175	0.0179	0.0173	0.0178	0.0181	0.0173	0.0176	0.0175	0.0175	0.0017	0.0173	0.0173	0.0173	0.0173	0.0175	0.0183	0.0173	0.0018	0.0173	0.0182	0.0173	0.0173	0.0176	0.0176	0.0176	0.0175	0.0017	0.0181	0.0176	0.0179	0.018	0.0181	0.0173	0.0175
[ 752] #CNGUB314-14|KR459383|BIOUG17919-G06|Ctenosciara_hyalipennis|COI-5P	CNGUB314-14	WNEA	0.019	0.019	0.019	0.0175	0.018	0.0173	0.0176	0.0017	0.0173	0.0173	0.0175	0.0017	0.0186	0.0175	0.0179	0.0173	0.0178	0.0181	0.0173	0.0176	0.0175	0.0175	0.0017	0.0173	0.0173	0.0173	0.0173	0.0175	0.0183	0.0173	0.0018	0.0173	0.0182	0.0173	0.0173	0.0176	0.0176	0.0176	0.0175	0.0017	0.0181	0.0176	0.0179	0.018	0.0181	0.0173	0.0175
[ 753] #CNGUB354-14|BIOUG17920-B11|Sciaridae|COI-5P	CNGUB354-14	WNEA	0.019	0.019	0.019	0.0175	0.018	0.0173	0.0176	0.0017	0.0173	0.0173	0.0175	0.0017	0.0186	0.0175	0.0179	0.0173	0.0178	0.0181	0.0173	0.0176	0.0175	0.0175	0.0017	0.0173	0.0173	0.0173	0.0173	0.0175	0.0183	0.0173	0.0018	0.0173	0.0182	0.0173	0.0173	0.0176	0.0176	0.0176	0.0175	0.0017	0.0181	0.0176	0.0179	0.018	0.0181	0.0173	0.0175
[ 754] #CNGUB356-14|KR466991|BIOUG17920-C01|Ctenosciara_hyalipennis|COI-5P	CNGUB356-14	WNEA	0.019	0.019	0.019	0.0175	0.018	0.0173	0.0176	0.0017	0.0173	0.0173	0.0175	0.0017	0.0186	0.0175	0.0179	0.0173	0.0178	0.0181	0.0173	0.0176	0.0175	0.0175	0.0017	0.0173	0.0173	0.0173	0.0173	0.0175	0.0183	0.0173	0.0018	0.0173	0.0182	0.0173	0.0173	0.0176	0.0176	0.0176	0.0175	0.0017	0.0181	0.0176	0.0179	0.018	0.0181	0.0173	0.0175
[ 755] #CNGUB358-14|KR467842|BIOUG17920-C03|Ctenosciara_hyalipennis|COI-5P	CNGUB358-14	WNEA	0.019	0.019	0.019	0.0175	0.018	0.0173	0.0176	0.0017	0.0173	0.0173	0.0175	0.0017	0.0186	0.0175	0.0179	0.0173	0.0178	0.0181	0.0173	0.0176	0.0175	0.0175	0.0017	0.0173	0.0173	0.0173	0.0173	0.0175	0.0183	0.0173	0.0018	0.0173	0.0182	0.0173	0.0173	0.0176	0.0176	0.0176	0.0175	0.0017	0.0181	0.0176	0.0179	0.018	0.0181	0.0173	0.0175
[ 756] #CNGUB396-14|KR460074|BIOUG17920-F05|Ctenosciara_hyalipennis|COI-5P	CNGUB396-14	WNEA	0.019	0.019	0.019	0.0175	0.018	0.0173	0.0176	0.0017	0.0173	0.0173	0.0175	0.0017	0.0186	0.0175	0.0179	0.0173	0.0178	0.0181	0.0173	0.0176	0.0175	0.0175	0.0017	0.0173	0.0173	0.0173	0.0173	0.0175	0.0183	0.0173	0.0018	0.0173	0.0182	0.0173	0.0173	0.0176	0.0176	0.0176	0.0175	0.0017	0.0181	0.0176	0.0179	0.018	0.0181	0.0173	0.0175
[ 757] #CNGUC156-15|KR471900|BIOUG17996-B11|Ctenosciara_hyalipennis|COI-5P	CNGUC156-15	WNEA	0.021	0.021	0.021	0.019	0.019	0.019	0.019	0.0019	0.019	0.019	0.019	0.0019	0.019	0.019	0.019	0.019	0.019	0.019	0.019	0.019	0.019	0.019	0.0019	0.019	0.019	0.019	0.019	0.019	0.019	0.019	0.0019	0.019	0.019	0.019	0.019	0.019	0.019	0.019	0.019	0.0019	0.019	0.019	0.019	0.019	0.019	0.019	0.019
[ 758] #CNGUC332-15|KR462652|BIOUG17998-A09|Ctenosciara_hyalipennis|COI-5P	CNGUC332-15	WNEA	0.0193	0.0193	0.0193	0.0175	0.018	0.0175	0.0176	0.0017	0.0175	0.0175	0.0175	0.0018	0.0186	0.0175	0.0179	0.0175	0.0178	0.0181	0.0175	0.0179	0.0175	0.0175	0.0017	0.0175	0.0175	0.0175	0.0175	0.0176	0.0183	0.0175	0.0018	0.0175	0.0182	0.0175	0.0175	0.0178	0.0178	0.0176	0.0175	0.0018	0.0181	0.0176	0.018	0.018	0.0181	0.0175	0.0175
[ 759] #CNGUC588-15|KR456850|BIOUG18031-G03|Ctenosciara_hyalipennis|COI-5P	CNGUC588-15	WNEA	0.0194	0.0194	0.0194	0.0178	0.0184	0.0176	0.018	0.0017	0.0176	0.0176	0.0178	0.0017	0.0186	0.0178	0.0179	0.0176	0.0179	0.0185	0.0176	0.0176	0.0179	0.0178	0.0018	0.0176	0.0176	0.0176	0.0176	0.0178	0.0184	0.0176	0.0018	0.0176	0.0186	0.0176	0.0176	0.0176	0.0176	0.018	0.0178	0.0017	0.0185	0.018	0.0179	0.0184	0.0185	0.0176	0.0178
[ 760] #CNGUC597-15|KR462391|BIOUG18031-G12|Ctenosciara_hyalipennis|COI-5P	CNGUC597-15	WNEA	0.0193	0.0193	0.0193	0.0175	0.018	0.0175	0.0176	0.0017	0.0175	0.0175	0.0175	0.0018	0.0186	0.0175	0.0179	0.0175	0.0178	0.0181	0.0175	0.0179	0.0175	0.0175	0.0017	0.0175	0.0175	0.0175	0.0175	0.0176	0.0183	0.0175	0.0018	0.0175	0.0182	0.0175	0.0175	0.0178	0.0178	0.0176	0.0175	0.0018	0.0181	0.0176	0.018	0.018	0.0181	0.0175	0.0175
[ 761] #CNGUC617-15|KR467293|BIOUG18032-A09|Ctenosciara_hyalipennis|COI-5P	CNGUC617-15	WNEA	0.019	0.019	0.019	0.0175	0.018	0.0173	0.0176	0.0017	0.0173	0.0173	0.0175	0.0017	0.0186	0.0175	0.0179	0.0173	0.0178	0.0181	0.0173	0.0176	0.0175	0.0175	0.0017	0.0173	0.0173	0.0173	0.0173	0.0175	0.0183	0.0173	0.0018	0.0173	0.0182	0.0173	0.0173	0.0176	0.0176	0.0176	0.0175	0.0017	0.0181	0.0176	0.0179	0.018	0.0181	0.0173	0.0175
[ 762] #CNGUC620-15|KR468604|BIOUG18032-A12|Ctenosciara_hyalipennis|COI-5P	CNGUC620-15	WNEA	0.0193	0.0193	0.0193	0.0175	0.018	0.0175	0.0176	0.0017	0.0175	0.0175	0.0175	0.0018	0.0186	0.0175	0.0179	0.0175	0.0178	0.0181	0.0175	0.0179	0.0175	0.0175	0.0017	0.0175	0.0175	0.0175	0.0175	0.0176	0.0183	0.0175	0.0018	0.0175	0.0182	0.0175	0.0175	0.0178	0.0178	0.0176	0.0175	0.0018	0.0181	0.0176	0.018	0.018	0.0181	0.0175	0.0175
[ 763] #CNGUC635-15|KR471091|BIOUG18032-C03|Ctenosciara_hyalipennis|COI-5P	CNGUC635-15	WNEA	0.019	0.019	0.019	0.0175	0.018	0.0173	0.0176	0.0017	0.0173	0.0173	0.0175	0.0017	0.0186	0.0175	0.0179	0.0173	0.0178	0.0181	0.0173	0.0176	0.0175	0.0175	0.0017	0.0173	0.0173	0.0173	0.0173	0.0175	0.0183	0.0173	0.0018	0.0173	0.0182	0.0173	0.0173	0.0176	0.0176	0.0176	0.0175	0.0017	0.0181	0.0176	0.0179	0.018	0.0181	0.0173	0.0175
[ 764] #CNGUC983-15|KR470525|BIOUG18036-A03|Ctenosciara_hyalipennis|COI-5P	CNGUC983-15	WNEA	0.0189	0.0189	0.0189	0.0175	0.0179	0.0173	0.0176	0.0017	0.0173	0.0173	0.0175	0.0017	0.0186	0.0175	0.0179	0.0173	0.0178	0.0181	0.0173	0.0176	0.0175	0.0175	0.0017	0.0173	0.0173	0.0172	0.0173	0.0175	0.0183	0.0173	0.0018	0.0172	0.0182	0.0173	0.0172	0.0176	0.0176	0.0176	0.0175	0.0017	0.0181	0.0176	0.0179	0.0179	0.0181	0.0173	0.0175
[ 765] #CNGUD214-15|KR466644|BIOUG18305-G01|Ctenosciara_hyalipennis|COI-5P	CNGUD214-15	WNEA	0.019	0.019	0.019	0.0175	0.018	0.0173	0.0176	0.0017	0.0173	0.0173	0.0175	0.0017	0.0186	0.0175	0.0179	0.0173	0.0178	0.0181	0.0173	0.0176	0.0175	0.0175	0.0017	0.0173	0.0173	0.0173	0.0173	0.0175	0.0183	0.0173	0.0018	0.0173	0.0182	0.0173	0.0173	0.0176	0.0176	0.0176	0.0175	0.0017	0.0181	0.0176	0.0179	0.018	0.0181	0.0173	0.0175
[ 766] #CNGUH358-15|KR977266|BIOUG18752-B10|Ctenosciara_hyalipennis|COI-5P	CNGUH358-15	WNEA	0.0186	0.0186	0.0186	0.0175	0.0179	0.0173	0.0176	0.0017	0.0173	0.0173	0.0175	0.0017	0.0186	0.0175	0.0179	0.0173	0.0178	0.0181	0.0173	0.0176	0.0175	0.0175	0.0017	0.0173	0.0173	0.0172	0.0173	0.0175	0.0183	0.0173	0.0018	0.0172	0.0182	0.0173	0.0172	0.0176	0.0176	0.0176	0.0175	0.0017	0.0181	0.0176	0.0179	0.0179	0.0181	0.0173	0.0175
[ 767] #CNGUH403-15|KR976461|BIOUG18752-F07|Ctenosciara_hyalipennis|COI-5P	CNGUH403-15	WNEA	0.019	0.019	0.019	0.0175	0.018	0.0173	0.0176	0.0017	0.0173	0.0173	0.0175	0.0017	0.0186	0.0175	0.0179	0.0173	0.0178	0.0181	0.0173	0.0176	0.0175	0.0175	0.0017	0.0173	0.0173	0.0173	0.0173	0.0175	0.0183	0.0173	0.0018	0.0173	0.0182	0.0173	0.0173	0.0176	0.0176	0.0176	0.0175	0.0017	0.0181	0.0176	0.0179	0.018	0.0181	0.0173	0.0175
[ 768] #CNKJA005-14|KR238411|BIOUG11202-A05|Ctenosciara_hyalipennis|COI-5P	CNKJA005-14	ENEA	0	0	0	0.0018	0.0018	0.0018	0.0018	0.02	0.0018	0.0018	0.0018	0.02	0.0018	0.0018	0.0018	0.0018	0.0018	0.0018	0.0018	0.0018	0.0018	0.0018	0.02	0.0018	0.0018	0.0018	0.0018	0.0018	0.0018	0.0018	0.0205	0.0018	0.0018	0.0018	0.0018	0.0018	0.0018	0.0018	0.0018	0.0201	0.0018	0.0018	0.0018	0.0018	0.0018	0.0018	0.0018
[ 769] #CNKJA027-14|KR237474|BIOUG11202-C03|Ctenosciara_hyalipennis|COI-5P	CNKJA027-14	ENEA	0	0	0	0.0017	0.0018	0.0017	0.0017	0.0194	0.0017	0.0017	0.0017	0.0198	0.0018	0.0017	0.0018	0.0017	0.0018	0.0018	0.0017	0.0018	0.0017	0.0017	0.0194	0.0017	0.0017	0.0017	0.0017	0.0017	0.0018	0.0017	0.0202	0.0017	0.0018	0.0017	0.0017	0.0018	0.0018	0.0017	0.0017	0.02	0.0018	0.0017	0.0018	0.0018	0.0018	0.0017	0.0017
[ 770] #CNKJA049-14|KR257573|BIOUG11202-E01|Ctenosciara_hyalipennis|COI-5P	CNKJA049-14	ENEA	0	0	0	0.0019	0.0019	0.0019	0.0019	0.019	0.0019	0.0019	0.0019	0.019	0.0019	0.0019	0.0019	0.0019	0.0019	0.0019	0.0019	0.0019	0.0019	0.0019	0.019	0.0019	0.0019	0.0019	0.0019	0.0019	0.0019	0.0019	0.0195	0.0019	0.0019	0.0019	0.0019	0.0019	0.0019	0.0019	0.0019	0.019	0.0019	0.0019	0.0019	0.0019	0.0019	0.0019	0.0019
[ 771] #CNKJA056-14|KR247502|BIOUG11202-E08|Ctenosciara_hyalipennis|COI-5P	CNKJA056-14	ENEA	0	0	0	0.0018	0.0018	0.0018	0.0018	0.0197	0.0018	0.0018	0.0018	0.0197	0.0018	0.0018	0.0018	0.0018	0.0018	0.0018	0.0018	0.0018	0.0018	0.0018	0.0197	0.0018	0.0018	0.0018	0.0018	0.0018	0.0018	0.0018	0.0203	0.0018	0.0018	0.0018	0.0018	0.0018	0.0018	0.0018	0.0018	0.0198	0.0018	0.0018	0.0018	0.0018	0.0018	0.0018	0.0018
[ 772] #CNKJA098-14|KR254372|BIOUG11203-A03|Ctenosciara_hyalipennis|COI-5P	CNKJA098-14	ENEA	0	0	0	0.0018	0.0018	0.0017	0.0018	0.0194	0.0017	0.0017	0.0018	0.0194	0.0018	0.0018	0.0018	0.0017	0.0018	0.0018	0.0017	0.0017	0.0018	0.0018	0.0197	0.0017	0.0017	0.0017	0.0017	0.0018	0.0018	0.0017	0.0203	0.0017	0.0018	0.0017	0.0017	0.0017	0.0017	0.0018	0.0018	0.0195	0.0018	0.0018	0.0018	0.0018	0.0018	0.0017	0.0018
[ 773] #CNKJA114-14|KR255086|BIOUG11203-B07|Ctenosciara_hyalipennis|COI-5P	CNKJA114-14	ENEA	0	0	0	0.0018	0.0018	0.0017	0.0018	0.0194	0.0017	0.0017	0.0018	0.0194	0.0018	0.0018	0.0018	0.0017	0.0018	0.0018	0.0017	0.0017	0.0018	0.0018	0.0197	0.0017	0.0017	0.0017	0.0017	0.0018	0.0018	0.0017	0.0203	0.0017	0.0018	0.0017	0.0017	0.0017	0.0017	0.0018	0.0018	0.0195	0.0018	0.0018	0.0018	0.0018	0.0018	0.0017	0.0018
[ 774] #CNKJA164-14|KR245067|BIOUG11203-F09|Ctenosciara_hyalipennis|COI-5P	CNKJA164-14	ENEA	0	0	0	0.0018	0.0018	0.0018	0.0018	0.0199	0.0018	0.0018	0.0018	0.0199	0.0018	0.0018	0.0018	0.0018	0.0018	0.0018	0.0018	0.0018	0.0018	0.0018	0.0199	0.0018	0.0018	0.0018	0.0018	0.0018	0.0018	0.0018	0.0203	0.0018	0.0018	0.0018	0.0018	0.0018	0.0018	0.0018	0.0018	0.02	0.0018	0.0018	0.0018	0.0018	0.0018	0.0018	0.0018
[ 775] #CNKJA168-14|KR249831|BIOUG11203-G01|Ctenosciara_hyalipennis|COI-5P	CNKJA168-14	ENEA	0	0	0	0.0017	0.0018	0.0017	0.0017	0.0189	0.0017	0.0017	0.0017	0.0193	0.0018	0.0017	0.0018	0.0017	0.0018	0.0018	0.0017	0.0017	0.0017	0.0017	0.0193	0.0017	0.0017	0.0017	0.0017	0.0017	0.0018	0.0017	0.0202	0.0017	0.0018	0.0017	0.0017	0.0017	0.0017	0.0017	0.0017	0.0195	0.0018	0.0017	0.0018	0.0018	0.0018	0.0017	0.0017
[ 776] #CNKJA185-14|KR247469|BIOUG11203-H06|Ctenosciara_hyalipennis|COI-5P	CNKJA185-14	ENEA	0	0	0	0.0017	0.0018	0.0017	0.0017	0.0189	0.0017	0.0017	0.0017	0.0193	0.0018	0.0017	0.0018	0.0017	0.0018	0.0018	0.0017	0.0017	0.0017	0.0017	0.0193	0.0017	0.0017	0.0017	0.0017	0.0017	0.0018	0.0017	0.0202	0.0017	0.0018	0.0017	0.0017	0.0017	0.0017	0.0017	0.0017	0.0195	0.0018	0.0017	0.0018	0.0018	0.0018	0.0017	0.0017
[ 777] #CNKJA266-14|KR252830|BIOUG11204-G04|Ctenosciara_hyalipennis|COI-5P	CNKJA266-14	ENEA	0	0	0	0.0018	0.0018	0.0018	0.0018	0.0203	0.0018	0.0018	0.0018	0.0207	0.0019	0.0018	0.0019	0.0018	0.0018	0.0018	0.0018	0.0019	0.0018	0.0018	0.0203	0.0018	0.0018	0.0018	0.0018	0.0018	0.0018	0.0018	0.0207	0.0018	0.0018	0.0018	0.0018	0.0018	0.0018	0.0018	0.0018	0.0209	0.0018	0.0018	0.0019	0.0018	0.0018	0.0018	0.0018
[ 778] #CNKJA271-14|KR255219|BIOUG11204-G09|Ctenosciara_hyalipennis|COI-5P	CNKJA271-14	ENEA	0	0	0	0.0017	0.0018	0.0017	0.0017	0.0189	0.0017	0.0017	0.0017	0.0193	0.0018	0.0017	0.0018	0.0017	0.0018	0.0018	0.0017	0.0017	0.0017	0.0017	0.0193	0.0017	0.0017	0.0017	0.0017	0.0017	0.0018	0.0017	0.0202	0.0017	0.0018	0.0017	0.0017	0.0017	0.0017	0.0017	0.0017	0.0195	0.0018	0.0017	0.0018	0.0018	0.0018	0.0017	0.0017
[ 779] #CNKJB030-14|KR235041|BIOUG11207-F04|Ctenosciara_hyalipennis|COI-5P	CNKJB030-14	ENEA	0	0	0	0.0017	0.0018	0.0017	0.0017	0.0189	0.0017	0.0017	0.0017	0.0193	0.0018	0.0017	0.0018	0.0017	0.0018	0.0018	0.0017	0.0017	0.0017	0.0017	0.0193	0.0017	0.0017	0.0017	0.0017	0.0017	0.0018	0.0017	0.0202	0.0017	0.0018	0.0017	0.0017	0.0017	0.0017	0.0017	0.0017	0.0195	0.0018	0.0017	0.0018	0.0018	0.0018	0.0017	0.0017
[ 780] #CNKJB061-14|KR239429|BIOUG11207-H11|Ctenosciara_hyalipennis|COI-5P	CNKJB061-14	ENEA	0	0	0	0.0017	0.0018	0.0017	0.0017	0.0189	0.0017	0.0017	0.0017	0.0193	0.0018	0.0017	0.0018	0.0017	0.0018	0.0018	0.0017	0.0017	0.0017	0.0017	0.0193	0.0017	0.0017	0.0017	0.0017	0.0017	0.0018	0.0017	0.0202	0.0017	0.0018	0.0017	0.0017	0.0017	0.0017	0.0017	0.0017	0.0195	0.0018	0.0017	0.0018	0.0018	0.0018	0.0017	0.0017
[ 781] #CNKJB181-14|KR236482|BIOUG11363-B12|Ctenosciara_hyalipennis|COI-5P	CNKJB181-14	ENEA	0	0	0	0.0018	0.0019	0.0018	0.0019	0.0202	0.0018	0.0018	0.0018	0.0202	0.0019	0.0018	0.0018	0.0018	0.0018	0.0019	0.0018	0.0018	0.0018	0.0018	0.0205	0.0018	0.0018	0.0018	0.0018	0.0018	0.0019	0.0018	0.0212	0.0018	0.0019	0.0018	0.0018	0.0018	0.0018	0.0019	0.0018	0.0202	0.0019	0.0019	0.0018	0.0019	0.0019	0.0018	0.0018
[ 782] #CNKJB210-14|KR239041|BIOUG11363-E05|Ctenosciara_hyalipennis|COI-5P	CNKJB210-14	ENEA	0	0	0	0.0018	0.0018	0.0018	0.0018	0.0198	0.0018	0.0018	0.0018	0.0198	0.0018	0.0018	0.0018	0.0018	0.0018	0.0018	0.0018	0.0018	0.0018	0.0018	0.0198	0.0018	0.0018	0.0018	0.0018	0.0018	0.0018	0.0018	0.0204	0.0018	0.0018	0.0018	0.0018	0.0018	0.0018	0.0018	0.0018	0.0198	0.0018	0.0018	0.0018	0.0018	0.0018	0.0018	0.0018
[ 783] #CNKJB227-14|KR244777|BIOUG11363-F10|Ctenosciara_hyalipennis|COI-5P	CNKJB227-14	ENEA	0	0	0	0.0018	0.0018	0.0017	0.0018	0.0195	0.0017	0.0017	0.0018	0.0195	0.0018	0.0018	0.0018	0.0017	0.0018	0.0018	0.0017	0.0017	0.0018	0.0018	0.0198	0.0017	0.0017	0.0017	0.0017	0.0018	0.0018	0.0017	0.0204	0.0017	0.0018	0.0017	0.0017	0.0017	0.0017	0.0018	0.0018	0.0195	0.0018	0.0018	0.0018	0.0018	0.0018	0.0017	0.0018
[ 784] #CNKJB282-14|KR248073|BIOUG11364-C06|Ctenosciara_hyalipennis|COI-5P	CNKJB282-14	ENEA	0	0	0	0.0018	0.0019	0.0018	0.0018	0.0199	0.0018	0.0018	0.0018	0.0199	0.0019	0.0018	0.0018	0.0018	0.0018	0.0019	0.0018	0.0018	0.0018	0.0018	0.0201	0.0018	0.0018	0.0018	0.0018	0.0018	0.0019	0.0018	0.0208	0.0018	0.0019	0.0018	0.0018	0.0018	0.0018	0.0018	0.0018	0.0199	0.0019	0.0018	0.0018	0.0019	0.0019	0.0018	0.0018
[ 785] #CNKJB319-14|KR235175|BIOUG11364-F07|Ctenosciara_hyalipennis|COI-5P	CNKJB319-14	ENEA	0	0	0	0.0018	0.0019	0.0018	0.0018	0.0199	0.0018	0.0018	0.0018	0.0199	0.0019	0.0018	0.0018	0.0018	0.0018	0.0019	0.0018	0.0018	0.0018	0.0018	0.0201	0.0018	0.0018	0.0018	0.0018	0.0018	0.0019	0.0018	0.0208	0.0018	0.0019	0.0018	0.0018	0.0018	0.0018	0.0018	0.0018	0.0199	0.0019	0.0018	0.0018	0.0019	0.0019	0.0018	0.0018
[ 786] #CNKJB320-14|KR244134|BIOUG11364-F08|Ctenosciara_hyalipennis|COI-5P	CNKJB320-14	ENEA	0	0	0	0.0017	0.0018	0.0017	0.0018	0.0192	0.0017	0.0017	0.0017	0.0194	0.0018	0.0017	0.0018	0.0017	0.0018	0.0018	0.0017	0.0017	0.0017	0.0017	0.0195	0.0017	0.0017	0.0017	0.0017	0.0017	0.0018	0.0017	0.0202	0.0017	0.0018	0.0017	0.0017	0.0017	0.0017	0.0018	0.0017	0.0195	0.0018	0.0018	0.0018	0.0018	0.0018	0.0017	0.0017
[ 787] #CNKJB327-14|KR245282|BIOUG11364-G03|Ctenosciara_hyalipennis|COI-5P	CNKJB327-14	ENEA	0	0	0	0.0018	0.0018	0.0018	0.0018	0.0198	0.0018	0.0018	0.0018	0.0198	0.0018	0.0018	0.0018	0.0018	0.0018	0.0018	0.0018	0.0018	0.0018	0.0018	0.0198	0.0018	0.0018	0.0018	0.0018	0.0018	0.0018	0.0018	0.0203	0.0018	0.0018	0.0018	0.0018	0.0018	0.0018	0.0018	0.0018	0.0199	0.0018	0.0018	0.0018	0.0018	0.0018	0.0018	0.0018
[ 788] #CNKJB353-14|KR244638|BIOUG11365-A06|Ctenosciara_hyalipennis|COI-5P	CNKJB353-14	ENEA	0	0	0	0.0017	0.0018	0.0017	0.0017	0.0189	0.0017	0.0017	0.0017	0.0193	0.0018	0.0017	0.0018	0.0017	0.0018	0.0018	0.0017	0.0017	0.0017	0.0017	0.0193	0.0017	0.0017	0.0017	0.0017	0.0017	0.0018	0.0017	0.0202	0.0017	0.0018	0.0017	0.0017	0.0017	0.0017	0.0017	0.0017	0.0195	0.0018	0.0017	0.0018	0.0018	0.0018	0.0017	0.0017
[ 789] #CNKJB454-14|KR240277|BIOUG11366-A12|Ctenosciara_hyalipennis|COI-5P	CNKJB454-14	ENEA	0	0	0	0.0017	0.0018	0.0017	0.0017	0.0189	0.0017	0.0017	0.0017	0.0193	0.0018	0.0017	0.0018	0.0017	0.0018	0.0018	0.0017	0.0017	0.0017	0.0017	0.0193	0.0017	0.0017	0.0017	0.0017	0.0017	0.0018	0.0017	0.0202	0.0017	0.0018	0.0017	0.0017	0.0017	0.0017	0.0017	0.0017	0.0195	0.0018	0.0017	0.0018	0.0018	0.0018	0.0017	0.0017
[ 790] #CNKJB515-14|KR239287|BIOUG11366-G01|Ctenosciara_hyalipennis|COI-5P	CNKJB515-14	ENEA	0	0	0	0.0017	0.0018	0.0017	0.0017	0.0189	0.0017	0.0017	0.0017	0.0193	0.0018	0.0017	0.0018	0.0017	0.0018	0.0018	0.0017	0.0017	0.0017	0.0017	0.0193	0.0017	0.0017	0.0017	0.0017	0.0017	0.0018	0.0017	0.0202	0.0017	0.0018	0.0017	0.0017	0.0017	0.0017	0.0017	0.0017	0.0195	0.0018	0.0017	0.0018	0.0018	0.0018	0.0017	0.0017
[ 791] #CNKJF1001-14|KR244650|BIOUG11752-D06|Ctenosciara_hyalipennis|COI-5P	CNKJF1001-14	ENEA	0	0	0	0.0017	0.0018	0.0017	0.0017	0.0193	0.0017	0.0017	0.0017	0.0197	0.0018	0.0017	0.0018	0.0017	0.0018	0.0018	0.0017	0.0018	0.0017	0.0017	0.0193	0.0017	0.0017	0.0017	0.0017	0.0017	0.0018	0.0017	0.0202	0.0017	0.0018	0.0017	0.0017	0.0018	0.0018	0.0017	0.0017	0.0199	0.0018	0.0017	0.0018	0.0018	0.0018	0.0017	0.0017
[ 792] #CNKJF301-14|KR243664|BIOUG11695-A07|Ctenosciara_hyalipennis|COI-5P	CNKJF301-14	ENEA	0	0	0	0.0018	0.0019	0.0018	0.0018	0.0205	0.0018	0.0018	0.0018	0.0205	0.0019	0.0018	0.0018	0.0018	0.0018	0.0019	0.0018	0.0018	0.0018	0.0018	0.0205	0.0018	0.0018	0.0018	0.0018	0.0018	0.0019	0.0018	0.0211	0.0018	0.0019	0.0018	0.0018	0.0018	0.0018	0.0018	0.0018	0.0205	0.0019	0.0018	0.0018	0.0019	0.0019	0.0018	0.0018
[ 793] #CNKJF910-14|KR244981|BIOUG11751-D10|Ctenosciara_hyalipennis|COI-5P	CNKJF910-14	ENEA	0	0	0	0.0017	0.0018	0.0017	0.0017	0.0193	0.0017	0.0017	0.0017	0.0197	0.0018	0.0017	0.0018	0.0017	0.0018	0.0018	0.0017	0.0018	0.0017	0.0017	0.0193	0.0017	0.0017	0.0017	0.0017	0.0017	0.0018	0.0017	0.0202	0.0017	0.0018	0.0017	0.0017	0.0018	0.0018	0.0017	0.0017	0.0199	0.0018	0.0017	0.0018	0.0018	0.0018	0.0017	0.0017
[ 794] #CNKJJ028-14|KR243189|BIOUG11945-G06|Ctenosciara_hyalipennis|COI-5P	CNKJJ028-14	ENEA	0	0	0	0.0018	0.0019	0.0018	0.0018	0.02	0.0018	0.0018	0.0018	0.02	0.0019	0.0018	0.0018	0.0018	0.0018	0.0019	0.0018	0.0018	0.0018	0.0018	0.0202	0.0018	0.0018	0.0018	0.0018	0.0018	0.0019	0.0018	0.0209	0.0018	0.0019	0.0018	0.0018	0.0018	0.0018	0.0018	0.0018	0.02	0.0019	0.0018	0.0018	0.0019	0.0019	0.0018	0.0018
[ 795] #CNKJJ055-14|KR258287|BIOUG11946-A10|Ctenosciara_hyalipennis|COI-5P	CNKJJ055-14	ENEA	0	0	0	0.0018	0.0019	0.0018	0.0019	0.0185	0.0018	0.0018	0.0018	0.0185	0.0019	0.0018	0.0019	0.0018	0.0019	0.0019	0.0018	0.0018	0.0019	0.0018	0.0188	0.0018	0.0018	0.0018	0.0018	0.0018	0.0019	0.0018	0.0194	0.0018	0.0019	0.0018	0.0018	0.0018	0.0018	0.0019	0.0018	0.0185	0.0019	0.0019	0.0018	0.0019	0.0019	0.0018	0.0018
[ 796] #CNKJJ058-14|KR237363|BIOUG11946-B01|Ctenosciara_hyalipennis|COI-5P	CNKJJ058-14	ENEA	0	0	0	0.0019	0.002	0.0019	0.0019	0.0193	0.0019	0.0019	0.0019	0.0193	0.002	0.0019	0.0019	0.0019	0.0019	0.002	0.0019	0.0019	0.0019	0.0019	0.0193	0.0019	0.0019	0.0019	0.0019	0.0019	0.002	0.0019	0.0198	0.0019	0.002	0.0019	0.0019	0.0019	0.0019	0.0019	0.0019	0.0193	0.002	0.0019	0.0019	0.002	0.002	0.0019	0.0019
[ 797] #CNKJJ078-14|KR258197|BIOUG11946-C09|Ctenosciara_hyalipennis|COI-5P	CNKJJ078-14	ENEA	0	0	0	0.0017	0.0018	0.0017	0.0017	0.0174	0.0017	0.0017	0.0017	0.0177	0.0018	0.0017	0.0018	0.0017	0.0018	0.0018	0.0017	0.0017	0.0017	0.0017	0.0176	0.0017	0.0017	0.0017	0.0017	0.0017	0.0018	0.0017	0.0185	0.0017	0.0018	0.0017	0.0017	0.0017	0.0017	0.0017	0.0017	0.0178	0.0018	0.0018	0.0018	0.0018	0.0018	0.0017	0.0017
[ 798] #CNKJK387-14|KR252528|BIOUG12067-A05|Ctenosciara_hyalipennis|COI-5P	CNKJK387-14	ENEA	0	0	0	0.0018	0.0019	0.0018	0.0018	0.0202	0.0018	0.0018	0.0018	0.0202	0.0019	0.0018	0.0018	0.0018	0.0018	0.0019	0.0018	0.0018	0.0018	0.0018	0.0205	0.0018	0.0018	0.0018	0.0018	0.0018	0.0019	0.0018	0.0211	0.0018	0.0019	0.0018	0.0018	0.0018	0.0018	0.0018	0.0018	0.0202	0.0019	0.0018	0.0018	0.0019	0.0019	0.0018	0.0018
[ 799] #CNKJK953-14|KR255480|BIOUG12073-A01|Ctenosciara_hyalipennis|COI-5P	CNKJK953-14	ENEA	0	0	0	0.0018	0.0019	0.0018	0.0018	0.0205	0.0018	0.0018	0.0018	0.0205	0.0019	0.0018	0.0018	0.0018	0.0018	0.0019	0.0018	0.0018	0.0018	0.0018	0.0205	0.0018	0.0018	0.0018	0.0018	0.0018	0.0019	0.0018	0.0211	0.0018	0.0019	0.0018	0.0018	0.0018	0.0018	0.0018	0.0018	0.0205	0.0019	0.0018	0.0018	0.0019	0.0019	0.0018	0.0018
[ 800] #CNKJK980-14|KR249074|BIOUG12073-C04|Ctenosciara_hyalipennis|COI-5P	CNKJK980-14	ENEA	0	0	0	0.0018	0.0018	0.0018	0.0018	0.0198	0.0018	0.0018	0.0018	0.0198	0.0018	0.0018	0.0018	0.0018	0.0018	0.0018	0.0018	0.0018	0.0018	0.0018	0.0198	0.0018	0.0018	0.0018	0.0018	0.0018	0.0018	0.0018	0.0203	0.0018	0.0018	0.0018	0.0018	0.0018	0.0018	0.0018	0.0018	0.0199	0.0018	0.0018	0.0018	0.0018	0.0018	0.0018	0.0018
[ 801] #CNKJL403-14|KR249173|BIOUG12244-G10|Ctenosciara_hyalipennis|COI-5P	CNKJL403-14	ENEA	0	0	0	0.0019	0.002	0.0019	0.0019	0.019	0.0019	0.0019	0.0019	0.019	0.002	0.0019	0.0019	0.0019	0.0019	0.002	0.0019	0.0019	0.0019	0.0019	0.0192	0.0019	0.0019	0.0019	0.0019	0.0019	0.002	0.0019	0.0199	0.0019	0.002	0.0019	0.0019	0.0019	0.0019	0.0019	0.0019	0.019	0.002	0.0019	0.0019	0.002	0.002	0.0019	0.0019
[ 802] #CNKJN1031-14|KR240518|BIOUG12740-D10|Ctenosciara_hyalipennis|COI-5P	CNKJN1031-14	ENEA	0	0	0	0.0018	0.0019	0.0018	0.0018	0.0199	0.0018	0.0018	0.0018	0.0199	0.0019	0.0018	0.0018	0.0018	0.0018	0.0019	0.0018	0.0018	0.0018	0.0018	0.0201	0.0018	0.0018	0.0018	0.0018	0.0018	0.0019	0.0018	0.0208	0.0018	0.0019	0.0018	0.0018	0.0018	0.0018	0.0018	0.0018	0.0199	0.0019	0.0018	0.0018	0.0019	0.0019	0.0018	0.0018
[ 803] #CNKJN1098-14|KR250190|BIOUG12741-B06|Ctenosciara_hyalipennis|COI-5P	CNKJN1098-14	ENEA	0	0	0	0.0018	0.0019	0.0018	0.0018	0.0202	0.0018	0.0018	0.0018	0.0202	0.0019	0.0018	0.0018	0.0018	0.0018	0.0019	0.0018	0.0018	0.0018	0.0018	0.0205	0.0018	0.0018	0.0018	0.0018	0.0018	0.0019	0.0018	0.0211	0.0018	0.0019	0.0018	0.0018	0.0018	0.0018	0.0018	0.0018	0.0202	0.0019	0.0018	0.0018	0.0019	0.0019	0.0018	0.0018
[ 804] #CNKJN376-14|KR252920|BIOUG12733-E08|Ctenosciara_hyalipennis|COI-5P	CNKJN376-14	ENEA	0	0	0	0.0017	0.0018	0.0017	0.0017	0.019	0.0017	0.0017	0.0017	0.0194	0.0018	0.0017	0.0018	0.0017	0.0018	0.0018	0.0017	0.0017	0.0017	0.0017	0.0193	0.0017	0.0017	0.0017	0.0017	0.0017	0.0018	0.0017	0.0202	0.0017	0.0018	0.0017	0.0017	0.0017	0.0017	0.0017	0.0017	0.0195	0.0018	0.0017	0.0018	0.0018	0.0018	0.0017	0.0017
[ 805] #CNKJP806-14|KR236921|BIOUG13290-G10|Ctenosciara_hyalipennis|COI-5P	CNKJP806-14	ENEA	0	0	0	0.0018	0.0018	0.0018	0.0018	0.0199	0.0018	0.0018	0.0018	0.0199	0.0018	0.0018	0.0018	0.0018	0.0018	0.0018	0.0018	0.0018	0.0018	0.0018	0.0199	0.0018	0.0018	0.0018	0.0018	0.0018	0.0018	0.0018	0.0203	0.0018	0.0018	0.0018	0.0018	0.0018	0.0018	0.0018	0.0018	0.02	0.0018	0.0018	0.0018	0.0018	0.0018	0.0018	0.0018
[ 806] #CNPEA080-14|KR243210|BIOUG10191-G08|Ctenosciara_hyalipennis|COI-5P	CNPEA080-14	ENEA	0	0	0	0.0017	0.0018	0.0017	0.0017	0.019	0.0017	0.0017	0.0017	0.0193	0.0018	0.0017	0.0018	0.0017	0.0018	0.0018	0.0017	0.0017	0.0017	0.0017	0.0193	0.0017	0.0017	0.0017	0.0017	0.0017	0.0018	0.0017	0.0202	0.0017	0.0018	0.0017	0.0017	0.0017	0.0017	0.0017	0.0017	0.0195	0.0018	0.0017	0.0018	0.0018	0.0018	0.0017	0.0017
[ 807] #CNPEA102-14|KR251091|BIOUG10192-A07|Ctenosciara_hyalipennis|COI-5P	CNPEA102-14	ENEA	0.0017	0.0017	0.0017	0	0	0	0	0.0175	0	0	0	0.0175	0	0	0	0	0	0	0	0	0	0	0.0178	0	0	0	0	0	0	0	0.0184	0	0	0	0	0	0	0	0	0.0177	0	0	0	0	0	0	0
[ 808] #CNPEA1025-14|KR242428|BIOUG10211-G03|Ctenosciara_hyalipennis|COI-5P	CNPEA1025-14	ENEA	0.0017	0.0017	0.0017	0	0	0	0	0.0175	0	0	0	0.0178	0	0	0	0	0	0	0	0	0	0	0.0175	0	0	0	0	0	0	0	0.0184	0	0	0	0	0	0	0	0	0.018	0	0	0	0	0	0	0
[ 809] #CNPEA1026-14|KR245091|BIOUG10211-G04|Ctenosciara_hyalipennis|COI-5P	CNPEA1026-14	ENEA	0.0019	0.0019	0.0019	0	0	0	0	0.0193	0	0	0	0.0193	0	0	0	0	0	0	0	0	0	0	0.0193	0	0	0	0	0	0	0	0.0193	0	0	0	0	0	0	0	0	0.0193	0	0	0	0	0	0	0
[ 810] #CNPEA1027-14|KR256298|BIOUG10211-G05|Ctenosciara_hyalipennis|COI-5P	CNPEA1027-14	ENEA	0.0019	0.0019	0.0019	0	0	0	0	0.0193	0	0	0	0.0193	0	0	0	0	0	0	0	0	0	0	0.0193	0	0	0	0	0	0	0	0.0193	0	0	0	0	0	0	0	0	0.0193	0	0	0	0	0	0	0
[ 811] #CNPEA1083-14|KR258259|BIOUG10212-D02|Ctenosciara_hyalipennis|COI-5P	CNPEA1083-14	ENEA	0.0017	0.0017	0.0017	0	0	0	0	0.0172	0	0	0	0.0175	0	0	0	0	0	0	0	0	0	0	0.0175	0	0	0	0	0	0	0	0.0184	0	0	0	0	0	0	0	0	0.0177	0	0	0	0	0	0	0
[ 812] #CNPEA127-14|KR250676|BIOUG10192-C08|Ctenosciara_hyalipennis|COI-5P	CNPEA127-14	ENEA	0	0	0	0.0017	0.0018	0.0017	0.0017	0.019	0.0017	0.0017	0.0017	0.0193	0.0018	0.0017	0.0018	0.0017	0.0018	0.0018	0.0017	0.0017	0.0017	0.0017	0.0193	0.0017	0.0017	0.0017	0.0017	0.0017	0.0018	0.0017	0.0202	0.0017	0.0018	0.0017	0.0017	0.0017	0.0017	0.0017	0.0017	0.0195	0.0018	0.0017	0.0018	0.0018	0.0018	0.0017	0.0017
[ 813] #CNPEA152-14|KR248093|BIOUG10192-E09|Ctenosciara_hyalipennis|COI-5P	CNPEA152-14	ENEA	0.0017	0.0017	0.0017	0	0	0	0	0.0175	0	0	0	0.0175	0	0	0	0	0	0	0	0	0	0	0.0178	0	0	0	0	0	0	0	0.0184	0	0	0	0	0	0	0	0	0.0177	0	0	0	0	0	0	0
[ 814] #CNPEA288-14|KR238102|BIOUG10194-A03|Ctenosciara_hyalipennis|COI-5P	CNPEA288-14	ENEA	0.0017	0.0017	0.0017	0	0	0	0	0.0172	0	0	0	0.0175	0	0	0	0	0	0	0	0	0	0	0.0175	0	0	0	0	0	0	0	0.0184	0	0	0	0	0	0	0	0	0.0177	0	0	0	0	0	0	0
[ 815] #CNPEA536-14|KR257912|BIOUG10196-F01|Ctenosciara_hyalipennis|COI-5P	CNPEA536-14	ENEA	0.0017	0.0017	0.0017	0	0	0	0	0.0176	0	0	0	0.0179	0	0	0	0	0	0	0	0	0	0	0.0176	0	0	0	0	0	0	0	0.0184	0	0	0	0	0	0	0	0	0.0181	0	0	0	0	0	0	0
[ 816] #CNPEA566-14|KR237921|BIOUG10196-H07|Ctenosciara_hyalipennis|COI-5P	CNPEA566-14	ENEA	0.0017	0.0017	0.0017	0	0	0	0	0.0175	0	0	0	0.0175	0	0	0	0	0	0	0	0	0	0	0.0178	0	0	0	0	0	0	0	0.0184	0	0	0	0	0	0	0	0	0.0177	0	0	0	0	0	0	0
[ 817] #CNPEA588-14|KR234989|BIOUG10197-B06|Ctenosciara_hyalipennis|COI-5P	CNPEA588-14	ENEA	0.0018	0.0018	0.0018	0	0	0	0	0.018	0	0	0	0.018	0	0	0	0	0	0	0	0	0	0	0.018	0	0	0	0	0	0	0	0.0184	0	0	0	0	0	0	0	0	0.0181	0	0	0	0	0	0	0
[ 818] #CNPEA648-14|KR235192|BIOUG10197-G06|Ctenosciara_hyalipennis|COI-5P	CNPEA648-14	ENEA	0.0017	0.0017	0.0017	0	0	0	0	0.0175	0	0	0	0.0175	0	0	0	0	0	0	0	0	0	0	0.0178	0	0	0	0	0	0	0	0.0184	0	0	0	0	0	0	0	0	0.0177	0	0	0	0	0	0	0
[ 819] #CNPEA670-14|KR247683|BIOUG10198-A05|Ctenosciara_hyalipennis|COI-5P	CNPEA670-14	ENEA	0	0	0	0.0017	0.0018	0.0017	0.0017	0.019	0.0017	0.0017	0.0017	0.0193	0.0018	0.0017	0.0018	0.0017	0.0018	0.0018	0.0017	0.0017	0.0017	0.0017	0.0193	0.0017	0.0017	0.0017	0.0017	0.0017	0.0018	0.0017	0.0202	0.0017	0.0018	0.0017	0.0017	0.0017	0.0017	0.0017	0.0017	0.0195	0.0018	0.0017	0.0018	0.0018	0.0018	0.0017	0.0017
[ 820] #CNPEA751-14|KR248520|BIOUG10198-H02|Ctenosciara_hyalipennis|COI-5P	CNPEA751-14	ENEA	0.0017	0.0017	0.0017	0	0	0	0	0.0172	0	0	0	0.0175	0	0	0	0	0	0	0	0	0	0	0.0175	0	0	0	0	0	0	0	0.0184	0	0	0	0	0	0	0	0	0.0177	0	0	0	0	0	0	0
[ 821] #CNPEA922-14|KR245151|BIOUG10200-F07|Ctenosciara_hyalipennis|COI-5P	CNPEA922-14	ENEA	0.0019	0.0019	0.0019	0	0	0	0	0.0172	0	0	0	0.0172	0	0	0	0	0	0	0	0	0	0	0.0172	0	0	0	0	0	0	0	0.0178	0	0	0	0	0	0	0	0	0.0172	0	0	0	0	0	0	0
[ 822] #CNPEA987-14|KR252517|BIOUG10211-D01|Ctenosciara_hyalipennis|COI-5P	CNPEA987-14	ENEA	0.0017	0.0017	0.0017	0	0	0	0	0.0174	0	0	0	0.0178	0	0	0	0	0	0	0	0	0	0	0.0175	0	0	0	0	0	0	0	0.0184	0	0	0	0	0	0	0	0	0.018	0	0	0	0	0	0	0
[ 823] #CNPEB029-14|KR258253|BIOUG10216-B09|Ctenosciara_hyalipennis|COI-5P	CNPEB029-14	ENEA	0.0017	0.0017	0.0017	0	0	0	0	0.0172	0	0	0	0.0175	0	0	0	0	0	0	0	0	0	0	0.0175	0	0	0	0	0	0	0	0.0184	0	0	0	0	0	0	0	0	0.0177	0	0	0	0	0	0	0
[ 824] #CNPEB039-14|KR258543|BIOUG10216-C07|Ctenosciara_hyalipennis|COI-5P	CNPEB039-14	ENEA	0.0018	0.0018	0.0018	0	0	0	0	0.0181	0	0	0	0.0181	0	0	0	0	0	0	0	0	0	0	0.0184	0	0	0	0	0	0	0	0.0189	0	0	0	0	0	0	0	0	0.0181	0	0	0	0	0	0	0
[ 825] #CNPEB059-14|KR258310|BIOUG10216-E03|Ctenosciara_hyalipennis|COI-5P	CNPEB059-14	ENEA	0	0	0	0.0017	0.0018	0.0017	0.0017	0.0189	0.0017	0.0017	0.0017	0.0193	0.0018	0.0017	0.0018	0.0017	0.0018	0.0018	0.0017	0.0017	0.0017	0.0017	0.0193	0.0017	0.0017	0.0017	0.0017	0.0017	0.0018	0.0017	0.0202	0.0017	0.0018	0.0017	0.0017	0.0017	0.0017	0.0017	0.0017	0.0195	0.0018	0.0017	0.0018	0.0018	0.0018	0.0017	0.0017
[ 826] #CNPEB062-14|KR246936|BIOUG10216-E06|Ctenosciara_hyalipennis|COI-5P	CNPEB062-14	ENEA	0.0017	0.0017	0.0017	0	0	0	0	0.0172	0	0	0	0.0175	0	0	0	0	0	0	0	0	0	0	0.0175	0	0	0	0	0	0	0	0.0184	0	0	0	0	0	0	0	0	0.0177	0	0	0	0	0	0	0
[ 827] #CNPEB066-14|KR246275|BIOUG10216-E10|Ctenosciara_hyalipennis|COI-5P	CNPEB066-14	ENEA	0.0017	0.0017	0.0017	0	0	0	0	0.0172	0	0	0	0.0175	0	0	0	0	0	0	0	0	0	0	0.0175	0	0	0	0	0	0	0	0.0184	0	0	0	0	0	0	0	0	0.0177	0	0	0	0	0	0	0
[ 828] #CNPEB076-14|KR242730|BIOUG10216-F08|Ctenosciara_hyalipennis|COI-5P	CNPEB076-14	ENEA	0	0	0	0.0017	0.0018	0.0017	0.0017	0.0189	0.0017	0.0017	0.0017	0.0193	0.0018	0.0017	0.0018	0.0017	0.0018	0.0018	0.0017	0.0017	0.0017	0.0017	0.0193	0.0017	0.0017	0.0017	0.0017	0.0017	0.0018	0.0017	0.0202	0.0017	0.0018	0.0017	0.0017	0.0017	0.0017	0.0017	0.0017	0.0195	0.0018	0.0017	0.0018	0.0018	0.0018	0.0017	0.0017
[ 829] #CNPEB085-14|KR250460|BIOUG10216-G05|Ctenosciara_hyalipennis|COI-5P	CNPEB085-14	ENEA	0	0	0	0.0018	0.0018	0.0017	0.0018	0.0193	0.0017	0.0017	0.0018	0.0193	0.0018	0.0018	0.0018	0.0017	0.0018	0.0018	0.0017	0.0017	0.0018	0.0018	0.0196	0.0017	0.0017	0.0017	0.0017	0.0018	0.0018	0.0017	0.0202	0.0017	0.0018	0.0017	0.0017	0.0017	0.0017	0.0018	0.0018	0.0195	0.0018	0.0018	0.0018	0.0018	0.0018	0.0017	0.0018
[ 830] #CNPEB1007-14|KR254352|BIOUG10266-E01|Ctenosciara_hyalipennis|COI-5P	CNPEB1007-14	ENEA	0.0017	0.0017	0.0017	0	0	0	0	0.0172	0	0	0	0.0175	0	0	0	0	0	0	0	0	0	0	0.0175	0	0	0	0	0	0	0	0.0184	0	0	0	0	0	0	0	0	0.0177	0	0	0	0	0	0	0
[ 831] #CNPEB1017-14|KR245392|BIOUG10266-E11|Ctenosciara_hyalipennis|COI-5P	CNPEB1017-14	ENEA	0.0017	0.0017	0.0017	0	0	0	0	0.0172	0	0	0	0.0175	0	0	0	0	0	0	0	0	0	0	0.0175	0	0	0	0	0	0	0	0.0184	0	0	0	0	0	0	0	0	0.0177	0	0	0	0	0	0	0
[ 832] #CNPEB1021-14|KR252638|BIOUG10266-F03|Ctenosciara_hyalipennis|COI-5P	CNPEB1021-14	ENEA	0	0	0	0.0017	0.0018	0.0017	0.0017	0.019	0.0017	0.0017	0.0017	0.0193	0.0018	0.0017	0.0018	0.0017	0.0018	0.0018	0.0017	0.0017	0.0017	0.0017	0.0193	0.0017	0.0017	0.0017	0.0017	0.0017	0.0018	0.0017	0.0202	0.0017	0.0018	0.0017	0.0017	0.0017	0.0017	0.0017	0.0017	0.0195	0.0018	0.0017	0.0018	0.0018	0.0018	0.0017	0.0017
[ 833] #CNPEB103-14|KR234922|BIOUG10216-H11|Ctenosciara_hyalipennis|COI-5P	CNPEB103-14	ENEA	0.0017	0.0017	0.0017	0	0	0	0	0.0172	0	0	0	0.0175	0	0	0	0	0	0	0	0	0	0	0.0175	0	0	0	0	0	0	0	0.0184	0	0	0	0	0	0	0	0	0.0177	0	0	0	0	0	0	0
[ 834] #CNPEB1030-14|KR248198|BIOUG10266-F12|Ctenosciara_hyalipennis|COI-5P	CNPEB1030-14	ENEA	0.0017	0.0017	0.0017	0	0	0	0	0.0172	0	0	0	0.0175	0	0	0	0	0	0	0	0	0	0	0.0175	0	0	0	0	0	0	0	0.0184	0	0	0	0	0	0	0	0	0.0177	0	0	0	0	0	0	0
[ 835] #CNPEB1063-14|KR243369|BIOUG10267-A10|Ctenosciara_hyalipennis|COI-5P	CNPEB1063-14	ENEA	0	0	0	0.0018	0.0019	0.0018	0.0018	0.0199	0.0018	0.0018	0.0018	0.0199	0.0019	0.0018	0.0018	0.0018	0.0018	0.0019	0.0018	0.0018	0.0018	0.0018	0.0202	0.0018	0.0018	0.0018	0.0018	0.0018	0.0019	0.0018	0.0209	0.0018	0.0019	0.0018	0.0018	0.0018	0.0018	0.0018	0.0018	0.0199	0.0019	0.0018	0.0018	0.0019	0.0019	0.0018	0.0018
[ 836] #CNPEB1066-14|KR255961|BIOUG10267-B01|Ctenosciara_hyalipennis|COI-5P	CNPEB1066-14	ENEA	0	0	0	0.0018	0.0018	0.0017	0.0018	0.0193	0.0017	0.0017	0.0018	0.0193	0.0018	0.0018	0.0018	0.0017	0.0018	0.0018	0.0017	0.0017	0.0018	0.0018	0.0196	0.0017	0.0017	0.0017	0.0017	0.0018	0.0018	0.0017	0.0202	0.0017	0.0018	0.0017	0.0017	0.0017	0.0017	0.0018	0.0018	0.0195	0.0018	0.0018	0.0018	0.0018	0.0018	0.0017	0.0018
[ 837] #CNPEB1082-14|KR235277|BIOUG10267-C05|Ctenosciara_hyalipennis|COI-5P	CNPEB1082-14	ENEA	0.0017	0.0017	0.0017	0	0	0	0	0.0172	0	0	0	0.0175	0	0	0	0	0	0	0	0	0	0	0.0175	0	0	0	0	0	0	0	0.0184	0	0	0	0	0	0	0	0	0.0177	0	0	0	0	0	0	0
[ 838] #CNPEB1084-14|KR240532|BIOUG10267-C07|Ctenosciara_hyalipennis|COI-5P	CNPEB1084-14	ENEA	0.0017	0.0017	0.0017	0	0	0	0	0.0172	0	0	0	0.0175	0	0	0	0	0	0	0	0	0	0	0.0175	0	0	0	0	0	0	0	0.0184	0	0	0	0	0	0	0	0	0.0177	0	0	0	0	0	0	0
[ 839] #CNPEB1089-14|KR236677|BIOUG10267-C12|Ctenosciara_hyalipennis|COI-5P	CNPEB1089-14	ENEA	0.0017	0.0017	0.0017	0	0	0	0	0.0172	0	0	0	0.0175	0	0	0	0	0	0	0	0	0	0	0.0175	0	0	0	0	0	0	0	0.0184	0	0	0	0	0	0	0	0	0.0177	0	0	0	0	0	0	0
[ 840] #CNPEB1098-14|KR242306|BIOUG10267-D09|Ctenosciara_hyalipennis|COI-5P	CNPEB1098-14	ENEA	0	0	0	0.0017	0.0018	0.0017	0.0017	0.019	0.0017	0.0017	0.0017	0.0193	0.0018	0.0017	0.0018	0.0017	0.0018	0.0018	0.0017	0.0017	0.0017	0.0017	0.0193	0.0017	0.0017	0.0017	0.0017	0.0017	0.0018	0.0017	0.0202	0.0017	0.0018	0.0017	0.0017	0.0017	0.0017	0.0017	0.0017	0.0195	0.0018	0.0017	0.0018	0.0018	0.0018	0.0017	0.0017
[ 841] #CNPEB1103-14|KR244151|BIOUG10267-E02|Ctenosciara_hyalipennis|COI-5P	CNPEB1103-14	ENEA	0.0017	0.0017	0.0017	0	0	0	0	0.0172	0	0	0	0.0175	0	0	0	0	0	0	0	0	0	0	0.0175	0	0	0	0	0	0	0	0.0184	0	0	0	0	0	0	0	0	0.0177	0	0	0	0	0	0	0
[ 842] #CNPEB111-14|KR245676|BIOUG10217-A08|Ctenosciara_hyalipennis|COI-5P	CNPEB111-14	ENEA	0.0017	0.0017	0.0017	0	0	0	0	0.0172	0	0	0	0.0175	0	0	0	0	0	0	0	0	0	0	0.0175	0	0	0	0	0	0	0	0.0184	0	0	0	0	0	0	0	0	0.0177	0	0	0	0	0	0	0
[ 843] #CNPEB1117-14|KR246225|BIOUG10267-F04|Ctenosciara_hyalipennis|COI-5P	CNPEB1117-14	ENEA	0	0	0	0.0017	0.0018	0.0017	0.0017	0.0189	0.0017	0.0017	0.0017	0.0193	0.0018	0.0017	0.0018	0.0017	0.0018	0.0018	0.0017	0.0017	0.0017	0.0017	0.0193	0.0017	0.0017	0.0017	0.0017	0.0017	0.0018	0.0017	0.0202	0.0017	0.0018	0.0017	0.0017	0.0017	0.0017	0.0017	0.0017	0.0195	0.0018	0.0017	0.0018	0.0018	0.0018	0.0017	0.0017
[ 844] #CNPEB1121-14|KR253125|BIOUG10267-F08|Ctenosciara_hyalipennis|COI-5P	CNPEB1121-14	ENEA	0.0017	0.0017	0.0017	0	0	0	0	0.0176	0	0	0	0.018	0	0	0	0	0	0	0	0	0	0	0.0176	0	0	0	0	0	0	0	0.0184	0	0	0	0	0	0	0	0	0.0181	0	0	0	0	0	0	0
[ 845] #CNPEB1124-14|KR257504|BIOUG10267-F11|Ctenosciara_hyalipennis|COI-5P	CNPEB1124-14	ENEA	0	0	0	0.0017	0.0018	0.0017	0.0017	0.0191	0.0017	0.0017	0.0017	0.0194	0.0018	0.0017	0.0018	0.0017	0.0018	0.0018	0.0017	0.0017	0.0017	0.0017	0.0193	0.0017	0.0017	0.0017	0.0017	0.0017	0.0018	0.0017	0.0202	0.0017	0.0018	0.0017	0.0017	0.0017	0.0017	0.0017	0.0017	0.0196	0.0018	0.0017	0.0018	0.0018	0.0018	0.0017	0.0017
[ 846] #CNPEB1126-14|KR240072|BIOUG10267-G01|Ctenosciara_hyalipennis|COI-5P	CNPEB1126-14	ENEA	0.0017	0.0017	0.0017	0	0	0	0	0.0172	0	0	0	0.0175	0	0	0	0	0	0	0	0	0	0	0.0175	0	0	0	0	0	0	0	0.0184	0	0	0	0	0	0	0	0	0.0177	0	0	0	0	0	0	0
[ 847] #CNPEB1132-14|KR244901|BIOUG10267-G07|Ctenosciara_hyalipennis|COI-5P	CNPEB1132-14	ENEA	0.0017	0.0017	0.0017	0	0	0	0	0.0172	0	0	0	0.0175	0	0	0	0	0	0	0	0	0	0	0.0175	0	0	0	0	0	0	0	0.0184	0	0	0	0	0	0	0	0	0.0177	0	0	0	0	0	0	0
[ 848] #CNPEB1144-14|KR237647|BIOUG10267-H07|Ctenosciara_hyalipennis|COI-5P	CNPEB1144-14	ENEA	0.0017	0.0017	0.0017	0	0	0	0	0.0172	0	0	0	0.0175	0	0	0	0	0	0	0	0	0	0	0.0175	0	0	0	0	0	0	0	0.0184	0	0	0	0	0	0	0	0	0.0177	0	0	0	0	0	0	0
[ 849] #CNPEB1149-14|BIOUG10268-A01|Ctenosciara_hyalipennis|COI-5P	CNPEB1149-14	ENEA	0	0	0	0.0017	0.0018	0.0017	0.0017	0.0189	0.0017	0.0017	0.0017	0.0193	0.0018	0.0017	0.0018	0.0017	0.0018	0.0018	0.0017	0.0017	0.0017	0.0017	0.0193	0.0017	0.0017	0.0017	0.0017	0.0017	0.0018	0.0017	0.0202	0.0017	0.0018	0.0017	0.0017	0.0017	0.0017	0.0017	0.0017	0.0195	0.0018	0.0017	0.0018	0.0018	0.0018	0.0017	0.0017
[ 850] #CNPEB1163-14|KR251030|BIOUG10268-B03|Ctenosciara_hyalipennis|COI-5P	CNPEB1163-14	ENEA	0	0	0	0.0018	0.0019	0.0018	0.0018	0.0199	0.0018	0.0018	0.0018	0.0199	0.0019	0.0018	0.0018	0.0018	0.0018	0.0019	0.0018	0.0018	0.0018	0.0018	0.0202	0.0018	0.0018	0.0018	0.0018	0.0018	0.0019	0.0018	0.0209	0.0018	0.0019	0.0018	0.0018	0.0018	0.0018	0.0018	0.0018	0.0199	0.0019	0.0018	0.0018	0.0019	0.0019	0.0018	0.0018
[ 851] #CNPEB117-14|KR257286|BIOUG10217-B02|Ctenosciara_hyalipennis|COI-5P	CNPEB117-14	ENEA	0.0193	0.0193	0.0193	0.0178	0.0184	0.0175	0.018	0	0.0175	0.0175	0.0178	0	0.0186	0.0178	0.0179	0.0175	0.0179	0.0185	0.0175	0.0176	0.0178	0.0178	0	0.0175	0.0175	0.0175	0.0175	0.0178	0.0184	0.0175	0	0.0175	0.0185	0.0175	0.0175	0.0175	0.0175	0.018	0.0178	0	0.0185	0.018	0.018	0.0184	0.0185	0.0175	0.0178
[ 852] #CNPEB1172-14|KR241005|BIOUG10268-B12|Ctenosciara_hyalipennis|COI-5P	CNPEB1172-14	ENEA	0.0017	0.0017	0.0017	0	0	0	0	0.0176	0	0	0	0.0176	0	0	0	0	0	0	0	0	0	0	0.0179	0	0	0	0	0	0	0	0.0185	0	0	0	0	0	0	0	0	0.0177	0	0	0	0	0	0	0
[ 853] #CNPEB1174-14|KR253245|BIOUG10268-C02|Ctenosciara_hyalipennis|COI-5P	CNPEB1174-14	ENEA	0	0	0	0.0018	0.0018	0.0018	0.0018	0.0198	0.0018	0.0018	0.0018	0.0198	0.0018	0.0018	0.0018	0.0018	0.0018	0.0018	0.0018	0.0018	0.0018	0.0018	0.0198	0.0018	0.0018	0.0018	0.0018	0.0018	0.0018	0.0018	0.0203	0.0018	0.0018	0.0018	0.0018	0.0018	0.0018	0.0018	0.0018	0.0199	0.0018	0.0018	0.0018	0.0018	0.0018	0.0018	0.0018
[ 854] #CNPEB1178-14|KR238290|BIOUG10268-C06|Ctenosciara_hyalipennis|COI-5P	CNPEB1178-14	ENEA	0.0017	0.0017	0.0017	0	0	0	0	0.0177	0	0	0	0.0177	0	0	0	0	0	0	0	0	0	0	0.0179	0	0	0	0	0	0	0	0.0185	0	0	0	0	0	0	0	0	0.0177	0	0	0	0	0	0	0
[ 855] #CNPEB118-14|KR248502|BIOUG10217-B03|Ctenosciara_hyalipennis|COI-5P	CNPEB118-14	ENEA	0.0017	0.0017	0.0017	0	0	0	0	0.0172	0	0	0	0.0175	0	0	0	0	0	0	0	0	0	0	0.0175	0	0	0	0	0	0	0	0.0184	0	0	0	0	0	0	0	0	0.0177	0	0	0	0	0	0	0
[ 856] #CNPEB1188-14|KR238534|BIOUG10268-D04|Ctenosciara_hyalipennis|COI-5P	CNPEB1188-14	ENEA	0.0018	0.0018	0.0018	0	0	0	0	0.0181	0	0	0	0.0181	0	0	0	0	0	0	0	0	0	0	0.0181	0	0	0	0	0	0	0	0.0185	0	0	0	0	0	0	0	0	0.0181	0	0	0	0	0	0	0
[ 857] #CNPEB119-14|KR245349|BIOUG10217-B04|Ctenosciara_hyalipennis|COI-5P	CNPEB119-14	ENEA	0.0017	0.0017	0.0017	0	0	0	0	0.0175	0	0	0	0.0178	0	0	0	0	0	0	0	0	0	0	0.0175	0	0	0	0	0	0	0	0.0184	0	0	0	0	0	0	0	0	0.018	0	0	0	0	0	0	0
[ 858] #CNPEB1195-14|KR240250|BIOUG10268-D11|Ctenosciara_hyalipennis|COI-5P	CNPEB1195-14	ENEA	0.0018	0.0018	0.0018	0	0	0	0	0.0181	0	0	0	0.0181	0	0	0	0	0	0	0	0	0	0	0.0184	0	0	0	0	0	0	0	0.0189	0	0	0	0	0	0	0	0	0.0181	0	0	0	0	0	0	0
[ 859] #CNPEB1203-14|KR255561|BIOUG10268-E07|Ctenosciara_hyalipennis|COI-5P	CNPEB1203-14	ENEA	0	0	0	0.0018	0.0019	0.0018	0.0018	0.0202	0.0018	0.0018	0.0018	0.0202	0.0019	0.0018	0.0018	0.0018	0.0018	0.0019	0.0018	0.0018	0.0018	0.0018	0.0205	0.0018	0.0018	0.0018	0.0018	0.0018	0.0019	0.0018	0.0211	0.0018	0.0019	0.0018	0.0018	0.0018	0.0018	0.0018	0.0018	0.0202	0.0019	0.0018	0.0018	0.0019	0.0019	0.0018	0.0018
[ 860] #CNPEB1208-14|KR236520|BIOUG10268-E12|Ctenosciara_hyalipennis|COI-5P	CNPEB1208-14	ENEA	0.0017	0.0017	0.0017	0	0	0	0	0.0176	0	0	0	0.0176	0	0	0	0	0	0	0	0	0	0	0.0179	0	0	0	0	0	0	0	0.0184	0	0	0	0	0	0	0	0	0.0177	0	0	0	0	0	0	0
[ 861] #CNPEB1233-14|KR239860|BIOUG10268-H01|Ctenosciara_hyalipennis|COI-5P	CNPEB1233-14	ENEA	0	0	0	0.0018	0.0019	0.0018	0.0018	0.0202	0.0018	0.0018	0.0018	0.0202	0.0019	0.0018	0.0018	0.0018	0.0018	0.0019	0.0018	0.0018	0.0018	0.0018	0.0202	0.0018	0.0018	0.0018	0.0018	0.0018	0.0019	0.0018	0.0208	0.0018	0.0019	0.0018	0.0018	0.0018	0.0018	0.0018	0.0018	0.0202	0.0019	0.0018	0.0018	0.0019	0.0019	0.0018	0.0018
[ 862] #CNPEB1239-14|KR235600|BIOUG10268-H07|Ctenosciara_hyalipennis|COI-5P	CNPEB1239-14	ENEA	0	0	0	0.0018	0.0019	0.0018	0.0018	0.0202	0.0018	0.0018	0.0018	0.0202	0.0019	0.0018	0.0018	0.0018	0.0018	0.0019	0.0018	0.0018	0.0018	0.0018	0.0205	0.0018	0.0018	0.0018	0.0018	0.0018	0.0019	0.0018	0.0211	0.0018	0.0019	0.0018	0.0018	0.0018	0.0018	0.0018	0.0018	0.0202	0.0019	0.0018	0.0018	0.0019	0.0019	0.0018	0.0018
[ 863] #CNPEB1243-14|KR244098|BIOUG10268-H11|Ctenosciara_hyalipennis|COI-5P	CNPEB1243-14	ENEA	0.0017	0.0017	0.0017	0	0	0	0	0.0172	0	0	0	0.0175	0	0	0	0	0	0	0	0	0	0	0.0175	0	0	0	0	0	0	0	0.0184	0	0	0	0	0	0	0	0	0.0177	0	0	0	0	0	0	0
[ 864] #CNPEB1247-14|KR239303|BIOUG10269-A04|Ctenosciara_hyalipennis|COI-5P	CNPEB1247-14	ENEA	0.0017	0.0017	0.0017	0	0	0	0	0.0172	0	0	0	0.0175	0	0	0	0	0	0	0	0	0	0	0.0175	0	0	0	0	0	0	0	0.0184	0	0	0	0	0	0	0	0	0.0177	0	0	0	0	0	0	0
[ 865] #CNPEB125-14|KR253553|BIOUG10217-B10|Ctenosciara_hyalipennis|COI-5P	CNPEB125-14	ENEA	0.0017	0.0017	0.0017	0	0	0	0	0.0172	0	0	0	0.0175	0	0	0	0	0	0	0	0	0	0	0.0175	0	0	0	0	0	0	0	0.0184	0	0	0	0	0	0	0	0	0.0177	0	0	0	0	0	0	0
[ 866] #CNPEB1255-14|KR250778|BIOUG10269-A12|Ctenosciara_hyalipennis|COI-5P	CNPEB1255-14	ENEA	0	0	0	0.0018	0.0018	0.0017	0.0018	0.0195	0.0017	0.0017	0.0018	0.0195	0.0018	0.0018	0.0018	0.0017	0.0018	0.0018	0.0017	0.0017	0.0018	0.0018	0.0198	0.0017	0.0017	0.0017	0.0017	0.0018	0.0018	0.0017	0.0204	0.0017	0.0018	0.0017	0.0017	0.0017	0.0017	0.0018	0.0018	0.0195	0.0018	0.0018	0.0018	0.0018	0.0018	0.0017	0.0018
[ 867] #CNPEB126-14|KR239311|BIOUG10217-B11|Ctenosciara_hyalipennis|COI-5P	CNPEB126-14	ENEA	0.0017	0.0017	0.0017	0	0	0	0	0.0172	0	0	0	0.0175	0	0	0	0	0	0	0	0	0	0	0.0175	0	0	0	0	0	0	0	0.0184	0	0	0	0	0	0	0	0	0.0177	0	0	0	0	0	0	0
[ 868] #CNPEB1276-14|KR256628|BIOUG10269-C09|Ctenosciara_hyalipennis|COI-5P	CNPEB1276-14	ENEA	0	0	0	0.0018	0.0019	0.0018	0.0018	0.0202	0.0018	0.0018	0.0018	0.0202	0.0019	0.0018	0.0018	0.0018	0.0018	0.0019	0.0018	0.0018	0.0018	0.0018	0.0205	0.0018	0.0018	0.0018	0.0018	0.0018	0.0019	0.0018	0.0211	0.0018	0.0019	0.0018	0.0018	0.0018	0.0018	0.0018	0.0018	0.0202	0.0019	0.0018	0.0018	0.0019	0.0019	0.0018	0.0018
[ 869] #CNPEB128-14|KR238533|BIOUG10217-C01|Ctenosciara_hyalipennis|COI-5P	CNPEB128-14	ENEA	0.0017	0.0017	0.0017	0	0	0	0	0.0176	0	0	0	0.0178	0	0	0	0	0	0	0	0	0	0	0.0176	0	0	0	0	0	0	0	0.0184	0	0	0	0	0	0	0	0	0.018	0	0	0	0	0	0	0
[ 870] #CNPEB129-14|KR252851|BIOUG10217-C02|Ctenosciara_hyalipennis|COI-5P	CNPEB129-14	ENEA	0.0017	0.0017	0.0017	0	0	0	0	0.0172	0	0	0	0.0175	0	0	0	0	0	0	0	0	0	0	0.0175	0	0	0	0	0	0	0	0.0184	0	0	0	0	0	0	0	0	0.0177	0	0	0	0	0	0	0
[ 871] #CNPEB1292-14|KR257827|BIOUG10269-E01|Ctenosciara_hyalipennis|COI-5P	CNPEB1292-14	ENEA	0.0017	0.0017	0.0017	0	0	0	0	0.0177	0	0	0	0.0177	0	0	0	0	0	0	0	0	0	0	0.0179	0	0	0	0	0	0	0	0.0185	0	0	0	0	0	0	0	0	0.0177	0	0	0	0	0	0	0
[ 872] #CNPEB1297-14|KR255210|BIOUG10269-E06|Ctenosciara_hyalipennis|COI-5P	CNPEB1297-14	ENEA	0.0019	0.0019	0.0019	0	0	0	0	0.0174	0	0	0	0.0174	0	0	0	0	0	0	0	0	0	0	0.0174	0	0	0	0	0	0	0	0.018	0	0	0	0	0	0	0	0	0.0174	0	0	0	0	0	0	0
[ 873] #CNPEB1303-14|KR250191|BIOUG10269-E12|Ctenosciara_hyalipennis|COI-5P	CNPEB1303-14	ENEA	0.0018	0.0018	0.0018	0	0	0	0	0.018	0	0	0	0.018	0	0	0	0	0	0	0	0	0	0	0.018	0	0	0	0	0	0	0	0.0185	0	0	0	0	0	0	0	0	0.018	0	0	0	0	0	0	0
[ 874] #CNPEB1319-14|KR251423|BIOUG10269-G04|Ctenosciara_hyalipennis|COI-5P	CNPEB1319-14	ENEA	0.0017	0.0017	0.0017	0	0	0	0	0.0177	0	0	0	0.0177	0	0	0	0	0	0	0	0	0	0	0.0179	0	0	0	0	0	0	0	0.0185	0	0	0	0	0	0	0	0	0.0177	0	0	0	0	0	0	0
[ 875] #CNPEB1327-14|KR242436|BIOUG10269-G12|Ctenosciara_hyalipennis|COI-5P	CNPEB1327-14	ENEA	0.0017	0.0017	0.0017	0	0	0	0	0.0177	0	0	0	0.0177	0	0	0	0	0	0	0	0	0	0	0.0179	0	0	0	0	0	0	0	0.0185	0	0	0	0	0	0	0	0	0.0177	0	0	0	0	0	0	0
[ 876] #CNPEB1333-14|KR257694|BIOUG10269-H06|Ctenosciara_hyalipennis|COI-5P	CNPEB1333-14	ENEA	0	0	0	0.0018	0.0019	0.0018	0.0018	0.0202	0.0018	0.0018	0.0018	0.0202	0.0019	0.0018	0.0018	0.0018	0.0018	0.0019	0.0018	0.0018	0.0018	0.0018	0.0205	0.0018	0.0018	0.0018	0.0018	0.0018	0.0019	0.0018	0.0211	0.0018	0.0019	0.0018	0.0018	0.0018	0.0018	0.0018	0.0018	0.0202	0.0019	0.0018	0.0018	0.0019	0.0019	0.0018	0.0018
[ 877] #CNPEB1339-14|KR247669|BIOUG10270-A01|Ctenosciara_hyalipennis|COI-5P	CNPEB1339-14	ENEA	0.0017	0.0017	0.0017	0	0	0	0	0.0172	0	0	0	0.0175	0	0	0	0	0	0	0	0	0	0	0.0175	0	0	0	0	0	0	0	0.0184	0	0	0	0	0	0	0	0	0.0177	0	0	0	0	0	0	0
[ 878] #CNPEB134-14|KR247720|BIOUG10217-C07|Ctenosciara_hyalipennis|COI-5P	CNPEB134-14	ENEA	0.0017	0.0017	0.0017	0	0	0	0	0.0172	0	0	0	0.0175	0	0	0	0	0	0	0	0	0	0	0.0175	0	0	0	0	0	0	0	0.0184	0	0	0	0	0	0	0	0	0.0177	0	0	0	0	0	0	0
[ 879] #CNPEB1345-14|KR243744|BIOUG10270-A07|Ctenosciara_hyalipennis|COI-5P	CNPEB1345-14	ENEA	0	0	0	0.0018	0.0019	0.0018	0.0019	0.0185	0.0018	0.0018	0.0018	0.0185	0.0019	0.0018	0.0018	0.0018	0.0019	0.0019	0.0018	0.0018	0.0018	0.0018	0.0187	0.0018	0.0018	0.0018	0.0018	0.0018	0.0019	0.0018	0.0193	0.0018	0.0019	0.0018	0.0018	0.0018	0.0018	0.0019	0.0018	0.0185	0.0019	0.0019	0.0018	0.0019	0.0019	0.0018	0.0018
[ 880] #CNPEB1360-14|KR253976|BIOUG10270-B10|Ctenosciara_hyalipennis|COI-5P	CNPEB1360-14	ENEA	0.0017	0.0017	0.0017	0	0	0	0	0.0176	0	0	0	0.0176	0	0	0	0	0	0	0	0	0	0	0.0179	0	0	0	0	0	0	0	0.0185	0	0	0	0	0	0	0	0	0.0177	0	0	0	0	0	0	0
[ 881] #CNPEB1363-14|KR251074|BIOUG10270-C01|Ctenosciara_hyalipennis|COI-5P	CNPEB1363-14	ENEA	0.0018	0.0018	0.0018	0	0	0	0	0.0182	0	0	0	0.0182	0	0	0	0	0	0	0	0	0	0	0.0185	0	0	0	0	0	0	0	0.0191	0	0	0	0	0	0	0	0	0.0182	0	0	0	0	0	0	0
[ 882] #CNPEB1364-14|KR258225|BIOUG10270-C02|Ctenosciara_hyalipennis|COI-5P	CNPEB1364-14	ENEA	0.0017	0.0017	0.0017	0	0	0	0	0.0177	0	0	0	0.0177	0	0	0	0	0	0	0	0	0	0	0.0179	0	0	0	0	0	0	0	0.0185	0	0	0	0	0	0	0	0	0.0177	0	0	0	0	0	0	0
[ 883] #CNPEB1366-14|KR258608|BIOUG10270-C04|Ctenosciara_hyalipennis|COI-5P	CNPEB1366-14	ENEA	0.0017	0.0017	0.0017	0	0	0	0	0.0172	0	0	0	0.0175	0	0	0	0	0	0	0	0	0	0	0.0175	0	0	0	0	0	0	0	0.0184	0	0	0	0	0	0	0	0	0.0177	0	0	0	0	0	0	0
[ 884] #CNPEB1369-14|KR242026|BIOUG10270-C07|Ctenosciara_hyalipennis|COI-5P	CNPEB1369-14	ENEA	0.0018	0.0018	0.0018	0	0	0	0	0.0166	0	0	0	0.0166	0	0	0	0	0	0	0	0	0	0	0.0169	0	0	0	0	0	0	0	0.0174	0	0	0	0	0	0	0	0	0.0166	0	0	0	0	0	0	0
[ 885] #CNPEB137-14|KR252078|BIOUG10217-C10|Ctenosciara_hyalipennis|COI-5P	CNPEB137-14	ENEA	0.0017	0.0017	0.0017	0	0	0	0	0.0173	0	0	0	0.0175	0	0	0	0	0	0	0	0	0	0	0.0175	0	0	0	0	0	0	0	0.0184	0	0	0	0	0	0	0	0	0.0177	0	0	0	0	0	0	0
[ 886] #CNPEB1370-14|KR239941|BIOUG10270-C08|Ctenosciara_hyalipennis|COI-5P	CNPEB1370-14	ENEA	0.0018	0.0018	0.0018	0	0	0	0	0.0182	0	0	0	0.0182	0	0	0	0	0	0	0	0	0	0	0.0182	0	0	0	0	0	0	0	0.0187	0	0	0	0	0	0	0	0	0.0182	0	0	0	0	0	0	0
[ 887] #CNPEB1379-14|KR248138|BIOUG10270-D05|Ctenosciara_hyalipennis|COI-5P	CNPEB1379-14	ENEA	0	0	0	0.0019	0.0019	0.0019	0.0019	0.0189	0.0019	0.0019	0.0019	0.0189	0.0019	0.0019	0.0019	0.0019	0.0019	0.0019	0.0019	0.0019	0.0019	0.0019	0.0189	0.0019	0.0019	0.0019	0.0019	0.0019	0.0019	0.0019	0.0194	0.0019	0.0019	0.0019	0.0019	0.0019	0.0019	0.0019	0.0019	0.0189	0.0019	0.0019	0.0019	0.0019	0.0019	0.0019	0.0019
[ 888] #CNPEB138-14|KR236671|BIOUG10217-C11|Ctenosciara_hyalipennis|COI-5P	CNPEB138-14	ENEA	0.0017	0.0017	0.0017	0	0	0	0	0.0172	0	0	0	0.0175	0	0	0	0	0	0	0	0	0	0	0.0175	0	0	0	0	0	0	0	0.0184	0	0	0	0	0	0	0	0	0.0177	0	0	0	0	0	0	0
[ 889] #CNPEB1396-14|KR235986|BIOUG10270-E10|Ctenosciara_hyalipennis|COI-5P	CNPEB1396-14	ENEA	0.0017	0.0017	0.0017	0	0	0	0	0.0177	0	0	0	0.0177	0	0	0	0	0	0	0	0	0	0	0.0179	0	0	0	0	0	0	0	0.0185	0	0	0	0	0	0	0	0	0.0177	0	0	0	0	0	0	0
[ 890] #CNPEB1405-14|KR255405|BIOUG10270-F07|Ctenosciara_hyalipennis|COI-5P	CNPEB1405-14	ENEA	0.0019	0.0019	0.0019	0	0	0	0	0.0171	0	0	0	0.0171	0	0	0	0	0	0	0	0	0	0	0.0171	0	0	0	0	0	0	0	0.0171	0	0	0	0	0	0	0	0	0.0172	0	0	0	0	0	0	0
[ 891] #CNPEB143-14|KR244307|BIOUG10217-D04|Ctenosciara_hyalipennis|COI-5P	CNPEB143-14	ENEA	0.0017	0.0017	0.0017	0	0	0	0	0.0174	0	0	0	0.0175	0	0	0	0	0	0	0	0	0	0	0.0177	0	0	0	0	0	0	0	0.0184	0	0	0	0	0	0	0	0	0.0177	0	0	0	0	0	0	0
[ 892] #CNPEB1431-14|KR250290|BIOUG10270-H09|Ctenosciara_hyalipennis|COI-5P	CNPEB1431-14	ENEA	0.0017	0.0017	0.0017	0	0	0	0	0.0176	0	0	0	0.0176	0	0	0	0	0	0	0	0	0	0	0.0179	0	0	0	0	0	0	0	0.0185	0	0	0	0	0	0	0	0	0.0177	0	0	0	0	0	0	0
[ 893] #CNPEB1436-14|KR249187|BIOUG10301-A03|Ctenosciara_hyalipennis|COI-5P	CNPEB1436-14	ENEA	0.0018	0.0018	0.0018	0	0	0	0	0.0188	0	0	0	0.0188	0	0	0	0	0	0	0	0	0	0	0.0188	0	0	0	0	0	0	0	0.0192	0	0	0	0	0	0	0	0	0.0188	0	0	0	0	0	0	0
[ 894] #CNPEB1443-14|KR258563|BIOUG10301-A10|Ctenosciara_hyalipennis|COI-5P	CNPEB1443-14	ENEA	0.0017	0.0017	0.0017	0	0	0	0	0.0176	0	0	0	0.0176	0	0	0	0	0	0	0	0	0	0	0.0179	0	0	0	0	0	0	0	0.0184	0	0	0	0	0	0	0	0	0.0177	0	0	0	0	0	0	0
[ 895] #CNPEB1445-14|KR238160|BIOUG10301-A12|Ctenosciara_hyalipennis|COI-5P	CNPEB1445-14	ENEA	0	0	0	0.0019	0.002	0.0019	0.0019	0.0191	0.0019	0.0019	0.0019	0.0191	0.002	0.0019	0.0019	0.0019	0.0019	0.002	0.0019	0.0019	0.0019	0.0019	0.0194	0.0019	0.0019	0.0019	0.0019	0.0019	0.002	0.0019	0.02	0.0019	0.002	0.0019	0.0019	0.0019	0.0019	0.0019	0.0019	0.0191	0.002	0.0019	0.0019	0.002	0.002	0.0019	0.0019
[ 896] #CNPEB1451-14|KR237586|BIOUG10301-B06|Ctenosciara_hyalipennis|COI-5P	CNPEB1451-14	ENEA	0.0017	0.0017	0.0017	0	0	0	0	0.0177	0	0	0	0.0177	0	0	0	0	0	0	0	0	0	0	0.0179	0	0	0	0	0	0	0	0.0185	0	0	0	0	0	0	0	0	0.0177	0	0	0	0	0	0	0
[ 897] #CNPEB146-14|KR241385|BIOUG10217-D07|Ctenosciara_hyalipennis|COI-5P	CNPEB146-14	ENEA	0.0017	0.0017	0.0017	0	0	0	0	0.0172	0	0	0	0.0175	0	0	0	0	0	0	0	0	0	0	0.0175	0	0	0	0	0	0	0	0.0184	0	0	0	0	0	0	0	0	0.0177	0	0	0	0	0	0	0
[ 898] #CNPEB1465-14|KR239976|BIOUG10301-C08|Ctenosciara_hyalipennis|COI-5P	CNPEB1465-14	ENEA	0	0	0	0.0018	0.0019	0.0018	0.0018	0.0202	0.0018	0.0018	0.0018	0.0202	0.0019	0.0018	0.0018	0.0018	0.0018	0.0019	0.0018	0.0018	0.0018	0.0018	0.0202	0.0018	0.0018	0.0018	0.0018	0.0018	0.0019	0.0018	0.0209	0.0018	0.0019	0.0018	0.0018	0.0018	0.0018	0.0018	0.0018	0.0202	0.0019	0.0018	0.0018	0.0019	0.0019	0.0018	0.0018
[ 899] #CNPEB1472-14|KR248747|BIOUG10301-D03|Ctenosciara_hyalipennis|COI-5P	CNPEB1472-14	ENEA	0.0017	0.0017	0.0017	0	0	0	0	0.0177	0	0	0	0.0177	0	0	0	0	0	0	0	0	0	0	0.0179	0	0	0	0	0	0	0	0.0185	0	0	0	0	0	0	0	0	0.0177	0	0	0	0	0	0	0
[ 900] #CNPEB1486-14|KR235356|BIOUG10301-E05|Ctenosciara_hyalipennis|COI-5P	CNPEB1486-14	ENEA	0.0017	0.0017	0.0017	0	0	0	0	0.0172	0	0	0	0.0175	0	0	0	0	0	0	0	0	0	0	0.0175	0	0	0	0	0	0	0	0.0184	0	0	0	0	0	0	0	0	0.0177	0	0	0	0	0	0	0
[ 901] #CNPEB1501-14|KR238670|BIOUG10301-F08|Ctenosciara_hyalipennis|COI-5P	CNPEB1501-14	ENEA	0	0	0	0.0017	0.0018	0.0017	0.0017	0.0193	0.0017	0.0017	0.0017	0.0196	0.0018	0.0017	0.0018	0.0017	0.0018	0.0018	0.0017	0.0018	0.0017	0.0017	0.0193	0.0017	0.0017	0.0017	0.0017	0.0017	0.0018	0.0017	0.0202	0.0017	0.0018	0.0017	0.0017	0.0018	0.0018	0.0017	0.0017	0.0198	0.0018	0.0017	0.0018	0.0018	0.0018	0.0017	0.0017
[ 902] #CNPEB1503-14|KR253959|BIOUG10301-F10|Ctenosciara_hyalipennis|COI-5P	CNPEB1503-14	ENEA	0	0	0	0.0018	0.0018	0.0017	0.0018	0.0195	0.0017	0.0017	0.0018	0.0195	0.0018	0.0018	0.0018	0.0017	0.0018	0.0018	0.0017	0.0017	0.0018	0.0018	0.0198	0.0017	0.0017	0.0017	0.0017	0.0018	0.0018	0.0017	0.0204	0.0017	0.0018	0.0017	0.0017	0.0017	0.0017	0.0018	0.0018	0.0196	0.0018	0.0018	0.0018	0.0018	0.0018	0.0017	0.0018
[ 903] #CNPEB1504-14|KR251057|BIOUG10301-F11|Ctenosciara_hyalipennis|COI-5P	CNPEB1504-14	ENEA	0.0018	0.0018	0.0018	0	0	0	0	0.0166	0	0	0	0.0166	0	0	0	0	0	0	0	0	0	0	0.0169	0	0	0	0	0	0	0	0.0174	0	0	0	0	0	0	0	0	0.0166	0	0	0	0	0	0	0
[ 904] #CNPEB151-14|KR238026|BIOUG10217-D12|Ctenosciara_hyalipennis|COI-5P	CNPEB151-14	ENEA	0.0017	0.0017	0.0017	0	0	0	0	0.0173	0	0	0	0.0175	0	0	0	0	0	0	0	0	0	0	0.0175	0	0	0	0	0	0	0	0.0184	0	0	0	0	0	0	0	0	0.0177	0	0	0	0	0	0	0
[ 905] #CNPEB1512-14|KR244066|BIOUG10301-G07|Ctenosciara_hyalipennis|COI-5P	CNPEB1512-14	ENEA	0.0018	0.0018	0.0018	0	0	0	0	0.0186	0	0	0	0.0186	0	0	0	0	0	0	0	0	0	0	0.0186	0	0	0	0	0	0	0	0.0192	0	0	0	0	0	0	0	0	0.0186	0	0	0	0	0	0	0
[ 906] #CNPEB1515-14|KR243099|BIOUG10301-G10|Ctenosciara_hyalipennis|COI-5P	CNPEB1515-14	ENEA	0	0	0	0.0019	0.0019	0.0019	0.0019	0.0192	0.0019	0.0019	0.0019	0.0196	0.0019	0.0019	0.0019	0.0019	0.0019	0.0019	0.0019	0.0019	0.0019	0.0019	0.0192	0.0019	0.0019	0.0019	0.0019	0.0019	0.0019	0.0019	0.0196	0.0019	0.0019	0.0019	0.0019	0.0019	0.0019	0.0019	0.0019	0.0198	0.0019	0.0019	0.0019	0.0019	0.0019	0.0019	0.0019
[ 907] #CNPEB1516-14|KR245170|BIOUG10301-G11|Ctenosciara_hyalipennis|COI-5P	CNPEB1516-14	ENEA	0	0	0	0.0018	0.0018	0.0017	0.0018	0.0194	0.0017	0.0017	0.0018	0.0194	0.0018	0.0018	0.0018	0.0017	0.0018	0.0018	0.0017	0.0017	0.0018	0.0018	0.0197	0.0017	0.0017	0.0017	0.0017	0.0018	0.0018	0.0017	0.0203	0.0017	0.0018	0.0017	0.0017	0.0017	0.0017	0.0018	0.0018	0.0195	0.0018	0.0018	0.0018	0.0018	0.0018	0.0017	0.0018
[ 908] #CNPEB1519-14|KR234512|BIOUG10301-H02|Ctenosciara_hyalipennis|COI-5P	CNPEB1519-14	ENEA	0.0017	0.0017	0.0017	0	0	0	0	0.0177	0	0	0	0.0177	0	0	0	0	0	0	0	0	0	0	0.0179	0	0	0	0	0	0	0	0.0185	0	0	0	0	0	0	0	0	0.0177	0	0	0	0	0	0	0
[ 909] #CNPEB1521-14|KR238171|BIOUG10301-H04|Ctenosciara_hyalipennis|COI-5P	CNPEB1521-14	ENEA	0	0	0	0.0018	0.0018	0.0017	0.0018	0.0195	0.0017	0.0017	0.0018	0.0195	0.0018	0.0018	0.0018	0.0017	0.0018	0.0018	0.0017	0.0017	0.0018	0.0018	0.0198	0.0017	0.0017	0.0017	0.0017	0.0018	0.0018	0.0017	0.0204	0.0017	0.0018	0.0017	0.0017	0.0017	0.0017	0.0018	0.0018	0.0195	0.0018	0.0018	0.0018	0.0018	0.0018	0.0017	0.0018
[ 910] #CNPEB1541-14|KR258171|BIOUG10302-B01|Ctenosciara_hyalipennis|COI-5P	CNPEB1541-14	ENEA	0.0017	0.0017	0.0017	0	0	0	0	0.0172	0	0	0	0.0175	0	0	0	0	0	0	0	0	0	0	0.0175	0	0	0	0	0	0	0	0.0184	0	0	0	0	0	0	0	0	0.0177	0	0	0	0	0	0	0
[ 911] #CNPEB1544-14|KR243174|BIOUG10302-B04|Ctenosciara_hyalipennis|COI-5P	CNPEB1544-14	ENEA	0.0017	0.0017	0.0017	0	0	0	0	0.0172	0	0	0	0.0175	0	0	0	0	0	0	0	0	0	0	0.0175	0	0	0	0	0	0	0	0.0184	0	0	0	0	0	0	0	0	0.0177	0	0	0	0	0	0	0
[ 912] #CNPEB1546-14|KR254380|BIOUG10302-B06|Ctenosciara_hyalipennis|COI-5P	CNPEB1546-14	ENEA	0	0	0	0.0017	0.0018	0.0017	0.0017	0.019	0.0017	0.0017	0.0017	0.0193	0.0018	0.0017	0.0018	0.0017	0.0018	0.0018	0.0017	0.0017	0.0017	0.0017	0.0193	0.0017	0.0017	0.0017	0.0017	0.0017	0.0018	0.0017	0.0202	0.0017	0.0018	0.0017	0.0017	0.0017	0.0017	0.0017	0.0017	0.0195	0.0018	0.0017	0.0018	0.0018	0.0018	0.0017	0.0017
[ 913] #CNPEB1548-14|KR252033|BIOUG10302-B08|Ctenosciara_hyalipennis|COI-5P	CNPEB1548-14	ENEA	0.0017	0.0017	0.0017	0	0	0	0	0.0172	0	0	0	0.0175	0	0	0	0	0	0	0	0	0	0	0.0175	0	0	0	0	0	0	0	0.0184	0	0	0	0	0	0	0	0	0.0177	0	0	0	0	0	0	0
[ 914] #CNPEB1551-14|KR248130|BIOUG10302-B11|Ctenosciara_hyalipennis|COI-5P	CNPEB1551-14	ENEA	0.0017	0.0017	0.0017	0	0	0	0	0.0173	0	0	0	0.0175	0	0	0	0	0	0	0	0	0	0	0.0175	0	0	0	0	0	0	0	0.0184	0	0	0	0	0	0	0	0	0.0177	0	0	0	0	0	0	0
[ 915] #CNPEB1564-14|KR240212|BIOUG10302-C12|Ctenosciara_hyalipennis|COI-5P	CNPEB1564-14	ENEA	0.0017	0.0017	0.0017	0	0	0	0	0.0172	0	0	0	0.0175	0	0	0	0	0	0	0	0	0	0	0.0175	0	0	0	0	0	0	0	0.0184	0	0	0	0	0	0	0	0	0.0177	0	0	0	0	0	0	0
[ 916] #CNPEB1566-14|KR235633|BIOUG10302-D02|Ctenosciara_hyalipennis|COI-5P	CNPEB1566-14	ENEA	0	0	0	0.0017	0.0018	0.0017	0.0017	0.019	0.0017	0.0017	0.0017	0.0193	0.0018	0.0017	0.0018	0.0017	0.0018	0.0018	0.0017	0.0017	0.0017	0.0017	0.0193	0.0017	0.0017	0.0017	0.0017	0.0017	0.0018	0.0017	0.0202	0.0017	0.0018	0.0017	0.0017	0.0017	0.0017	0.0017	0.0017	0.0195	0.0018	0.0017	0.0018	0.0018	0.0018	0.0017	0.0017
[ 917] #CNPEB1576-14|KR255053|BIOUG10302-D12|Ctenosciara_hyalipennis|COI-5P	CNPEB1576-14	ENEA	0	0	0	0.0017	0.0018	0.0017	0.0017	0.019	0.0017	0.0017	0.0017	0.0193	0.0018	0.0017	0.0018	0.0017	0.0018	0.0018	0.0017	0.0017	0.0017	0.0017	0.0193	0.0017	0.0017	0.0017	0.0017	0.0017	0.0018	0.0017	0.0202	0.0017	0.0018	0.0017	0.0017	0.0017	0.0017	0.0017	0.0017	0.0195	0.0018	0.0017	0.0018	0.0018	0.0018	0.0017	0.0017
[ 918] #CNPEB1577-14|KR258709|BIOUG10302-E01|Ctenosciara_hyalipennis|COI-5P	CNPEB1577-14	ENEA	0	0	0	0.0017	0.0018	0.0017	0.0017	0.0189	0.0017	0.0017	0.0017	0.0193	0.0018	0.0017	0.0018	0.0017	0.0018	0.0018	0.0017	0.0017	0.0017	0.0017	0.0193	0.0017	0.0017	0.0017	0.0017	0.0017	0.0018	0.0017	0.0202	0.0017	0.0018	0.0017	0.0017	0.0017	0.0017	0.0017	0.0017	0.0195	0.0018	0.0017	0.0018	0.0018	0.0018	0.0017	0.0017
[ 919] #CNPEB1582-14|KR237594|BIOUG10302-E06|Ctenosciara_hyalipennis|COI-5P	CNPEB1582-14	ENEA	0	0	0	0.0017	0.0018	0.0017	0.0017	0.019	0.0017	0.0017	0.0017	0.0193	0.0018	0.0017	0.0018	0.0017	0.0018	0.0018	0.0017	0.0017	0.0017	0.0017	0.0193	0.0017	0.0017	0.0017	0.0017	0.0017	0.0018	0.0017	0.0202	0.0017	0.0018	0.0017	0.0017	0.0017	0.0017	0.0017	0.0017	0.0195	0.0018	0.0017	0.0018	0.0018	0.0018	0.0017	0.0017
[ 920] #CNPEB1590-14|KR248981|BIOUG10302-F02|Ctenosciara_hyalipennis|COI-5P	CNPEB1590-14	ENEA	0.0017	0.0017	0.0017	0	0	0	0	0.0172	0	0	0	0.0175	0	0	0	0	0	0	0	0	0	0	0.0175	0	0	0	0	0	0	0	0.0184	0	0	0	0	0	0	0	0	0.0177	0	0	0	0	0	0	0
[ 921] #CNPEB1592-14|KR246046|BIOUG10302-F04|Ctenosciara_hyalipennis|COI-5P	CNPEB1592-14	ENEA	0	0	0	0.0017	0.0018	0.0017	0.0017	0.019	0.0017	0.0017	0.0017	0.0193	0.0018	0.0017	0.0018	0.0017	0.0018	0.0018	0.0017	0.0017	0.0017	0.0017	0.0193	0.0017	0.0017	0.0017	0.0017	0.0017	0.0018	0.0017	0.0202	0.0017	0.0018	0.0017	0.0017	0.0017	0.0017	0.0017	0.0017	0.0195	0.0018	0.0017	0.0018	0.0018	0.0018	0.0017	0.0017
[ 922] #CNPEB1593-14|KR234329|BIOUG10302-F05|Ctenosciara_hyalipennis|COI-5P	CNPEB1593-14	ENEA	0.0017	0.0017	0.0017	0	0	0	0	0.0172	0	0	0	0.0175	0	0	0	0	0	0	0	0	0	0	0.0175	0	0	0	0	0	0	0	0.0184	0	0	0	0	0	0	0	0	0.0177	0	0	0	0	0	0	0
[ 923] #CNPEB1609-14|KR250242|BIOUG10302-G09|Ctenosciara_hyalipennis|COI-5P	CNPEB1609-14	ENEA	0.0017	0.0017	0.0017	0	0	0	0	0.0172	0	0	0	0.0175	0	0	0	0	0	0	0	0	0	0	0.0175	0	0	0	0	0	0	0	0.0184	0	0	0	0	0	0	0	0	0.0177	0	0	0	0	0	0	0
[ 924] #CNPEB1634-14|KR251590|BIOUG10303-A11|Ctenosciara_hyalipennis|COI-5P	CNPEB1634-14	ENEA	0.0017	0.0017	0.0017	0	0	0	0	0.0172	0	0	0	0.0175	0	0	0	0	0	0	0	0	0	0	0.0175	0	0	0	0	0	0	0	0.0184	0	0	0	0	0	0	0	0	0.0177	0	0	0	0	0	0	0
[ 925] #CNPEB164-14|KR245628|BIOUG10217-F01|Ctenosciara_hyalipennis|COI-5P	CNPEB164-14	ENEA	0.0017	0.0017	0.0017	0	0	0	0	0.0172	0	0	0	0.0175	0	0	0	0	0	0	0	0	0	0	0.0175	0	0	0	0	0	0	0	0.0184	0	0	0	0	0	0	0	0	0.0177	0	0	0	0	0	0	0
[ 926] #CNPEB1646-14|KR247110|BIOUG10303-B11|Ctenosciara_hyalipennis|COI-5P	CNPEB1646-14	ENEA	0.0017	0.0017	0.0017	0	0	0	0	0.0174	0	0	0	0.0178	0	0	0	0	0	0	0	0	0	0	0.0175	0	0	0	0	0	0	0	0.0184	0	0	0	0	0	0	0	0	0.018	0	0	0	0	0	0	0
[ 927] #CNPEB1648-14|KR240027|BIOUG10303-C01|Ctenosciara_hyalipennis|COI-5P	CNPEB1648-14	ENEA	0.0017	0.0017	0.0017	0	0	0	0	0.0172	0	0	0	0.0175	0	0	0	0	0	0	0	0	0	0	0.0175	0	0	0	0	0	0	0	0.0184	0	0	0	0	0	0	0	0	0.0177	0	0	0	0	0	0	0
[ 928] #CNPEB1659-14|KR238512|BIOUG10303-C12|Ctenosciara_hyalipennis|COI-5P	CNPEB1659-14	ENEA	0.0017	0.0017	0.0017	0	0	0	0	0.0172	0	0	0	0.0175	0	0	0	0	0	0	0	0	0	0	0.0175	0	0	0	0	0	0	0	0.0184	0	0	0	0	0	0	0	0	0.0177	0	0	0	0	0	0	0
[ 929] #CNPEB166-14|KR246786|BIOUG10217-F03|Ctenosciara_hyalipennis|COI-5P	CNPEB166-14	ENEA	0.0018	0.0018	0.0018	0	0	0	0	0.0186	0	0	0	0.0186	0	0	0	0	0	0	0	0	0	0	0.0186	0	0	0	0	0	0	0	0.0192	0	0	0	0	0	0	0	0	0.0186	0	0	0	0	0	0	0
[ 930] #CNPEB1671-14|KR249245|BIOUG10303-D12|Ctenosciara_hyalipennis|COI-5P	CNPEB1671-14	ENEA	0	0	0	0.0017	0.0018	0.0017	0.0017	0.0189	0.0017	0.0017	0.0017	0.0193	0.0018	0.0017	0.0018	0.0017	0.0018	0.0018	0.0017	0.0017	0.0017	0.0017	0.0193	0.0017	0.0017	0.0017	0.0017	0.0017	0.0018	0.0017	0.0202	0.0017	0.0018	0.0017	0.0017	0.0017	0.0017	0.0017	0.0017	0.0195	0.0018	0.0017	0.0018	0.0018	0.0018	0.0017	0.0017
[ 931] #CNPEB1679-14|KR237715|BIOUG10303-E08|Ctenosciara_hyalipennis|COI-5P	CNPEB1679-14	ENEA	0	0	0	0.0017	0.0018	0.0017	0.0017	0.0189	0.0017	0.0017	0.0017	0.0193	0.0018	0.0017	0.0018	0.0017	0.0018	0.0018	0.0017	0.0017	0.0017	0.0017	0.0193	0.0017	0.0017	0.0017	0.0017	0.0017	0.0018	0.0017	0.0202	0.0017	0.0018	0.0017	0.0017	0.0017	0.0017	0.0017	0.0017	0.0195	0.0018	0.0017	0.0018	0.0018	0.0018	0.0017	0.0017
[ 932] #CNPEB1681-14|KR248854|BIOUG10303-E10|Ctenosciara_hyalipennis|COI-5P	CNPEB1681-14	ENEA	0.0017	0.0017	0.0017	0	0	0	0	0.0172	0	0	0	0.0175	0	0	0	0	0	0	0	0	0	0	0.0175	0	0	0	0	0	0	0	0.0184	0	0	0	0	0	0	0	0	0.0177	0	0	0	0	0	0	0
[ 933] #CNPEB1686-14|KR255067|BIOUG10303-F03|Ctenosciara_hyalipennis|COI-5P	CNPEB1686-14	ENEA	0.0017	0.0017	0.0017	0	0	0	0	0.0172	0	0	0	0.0175	0	0	0	0	0	0	0	0	0	0	0.0175	0	0	0	0	0	0	0	0.0184	0	0	0	0	0	0	0	0	0.0177	0	0	0	0	0	0	0
[ 934] #CNPEB1690-14|KR240001|BIOUG10303-F07|Ctenosciara_hyalipennis|COI-5P	CNPEB1690-14	ENEA	0.0017	0.0017	0.0017	0	0	0	0	0.0172	0	0	0	0.0175	0	0	0	0	0	0	0	0	0	0	0.0175	0	0	0	0	0	0	0	0.0184	0	0	0	0	0	0	0	0	0.0177	0	0	0	0	0	0	0
[ 935] #CNPEB1692-14|KR240111|BIOUG10303-F09|Ctenosciara_hyalipennis|COI-5P	CNPEB1692-14	ENEA	0.0017	0.0017	0.0017	0	0	0	0	0.0172	0	0	0	0.0175	0	0	0	0	0	0	0	0	0	0	0.0175	0	0	0	0	0	0	0	0.0184	0	0	0	0	0	0	0	0	0.0177	0	0	0	0	0	0	0
[ 936] #CNPEB1695-14|KR242996|BIOUG10303-F12|Ctenosciara_hyalipennis|COI-5P	CNPEB1695-14	ENEA	0.0017	0.0017	0.0017	0	0	0	0	0.0172	0	0	0	0.0175	0	0	0	0	0	0	0	0	0	0	0.0175	0	0	0	0	0	0	0	0.0184	0	0	0	0	0	0	0	0	0.0177	0	0	0	0	0	0	0
[ 937] #CNPEB1713-14|KR257614|BIOUG10303-H06|Ctenosciara_hyalipennis|COI-5P	CNPEB1713-14	ENEA	0.0018	0.0018	0.0018	0	0	0	0	0.0181	0	0	0	0.0181	0	0	0	0	0	0	0	0	0	0	0.0184	0	0	0	0	0	0	0	0.0189	0	0	0	0	0	0	0	0	0.0181	0	0	0	0	0	0	0
[ 938] #CNPEB1715-14|KR239316|BIOUG10303-H08|Ctenosciara_hyalipennis|COI-5P	CNPEB1715-14	ENEA	0.0017	0.0017	0.0017	0	0	0	0	0.0172	0	0	0	0.0175	0	0	0	0	0	0	0	0	0	0	0.0175	0	0	0	0	0	0	0	0.0184	0	0	0	0	0	0	0	0	0.0177	0	0	0	0	0	0	0
[ 939] #CNPEB1718-14|KR249774|BIOUG10303-H11|Ctenosciara_hyalipennis|COI-5P	CNPEB1718-14	ENEA	0.0017	0.0017	0.0017	0	0	0	0	0.0172	0	0	0	0.0175	0	0	0	0	0	0	0	0	0	0	0.0175	0	0	0	0	0	0	0	0.0184	0	0	0	0	0	0	0	0	0.0177	0	0	0	0	0	0	0
[ 940] #CNPEB1724-14|KR241799|BIOUG10304-A06|Ctenosciara_hyalipennis|COI-5P	CNPEB1724-14	ENEA	0.0018	0.0018	0.0018	0	0	0	0	0.0181	0	0	0	0.0181	0	0	0	0	0	0	0	0	0	0	0.0181	0	0	0	0	0	0	0	0.0185	0	0	0	0	0	0	0	0	0.0182	0	0	0	0	0	0	0
[ 941] #CNPEB1725-14|KR258618|BIOUG10304-A07|Ctenosciara_hyalipennis|COI-5P	CNPEB1725-14	ENEA	0	0	0	0.0018	0.0018	0.0018	0.0018	0.0198	0.0018	0.0018	0.0018	0.0198	0.0018	0.0018	0.0018	0.0018	0.0018	0.0018	0.0018	0.0018	0.0018	0.0018	0.0198	0.0018	0.0018	0.0018	0.0018	0.0018	0.0018	0.0018	0.0204	0.0018	0.0018	0.0018	0.0018	0.0018	0.0018	0.0018	0.0018	0.0198	0.0018	0.0018	0.0018	0.0018	0.0018	0.0018	0.0018
[ 942] #CNPEB1726-14|KR254560|BIOUG10304-A08|Ctenosciara_hyalipennis|COI-5P	CNPEB1726-14	ENEA	0	0	0	0.0018	0.0018	0.0017	0.0018	0.0195	0.0017	0.0017	0.0018	0.0195	0.0018	0.0018	0.0018	0.0017	0.0018	0.0018	0.0017	0.0017	0.0018	0.0018	0.0198	0.0017	0.0017	0.0017	0.0017	0.0018	0.0018	0.0017	0.0204	0.0017	0.0018	0.0017	0.0017	0.0017	0.0017	0.0018	0.0018	0.0195	0.0018	0.0018	0.0018	0.0018	0.0018	0.0017	0.0018
[ 943] #CNPEB1727-14|KR256052|BIOUG10304-A09|Ctenosciara_hyalipennis|COI-5P	CNPEB1727-14	ENEA	0.0017	0.0017	0.0017	0	0	0	0	0.0177	0	0	0	0.0177	0	0	0	0	0	0	0	0	0	0	0.018	0	0	0	0	0	0	0	0.0185	0	0	0	0	0	0	0	0	0.0177	0	0	0	0	0	0	0
[ 944] #CNPEB173-14|KR242444|BIOUG10217-F10|Ctenosciara_hyalipennis|COI-5P	CNPEB173-14	ENEA	0.0017	0.0017	0.0017	0	0	0	0	0.0172	0	0	0	0.0175	0	0	0	0	0	0	0	0	0	0	0.0175	0	0	0	0	0	0	0	0.0184	0	0	0	0	0	0	0	0	0.0177	0	0	0	0	0	0	0
[ 945] #CNPEB1730-14|KR256693|BIOUG10304-A12|Ctenosciara_hyalipennis|COI-5P	CNPEB1730-14	ENEA	0.0017	0.0017	0.0017	0	0	0	0	0.0176	0	0	0	0.0176	0	0	0	0	0	0	0	0	0	0	0.0179	0	0	0	0	0	0	0	0.0185	0	0	0	0	0	0	0	0	0.0177	0	0	0	0	0	0	0
[ 946] #CNPEB1732-14|KR240140|BIOUG10304-B02|Ctenosciara_hyalipennis|COI-5P	CNPEB1732-14	ENEA	0	0	0	0.0018	0.0018	0.0017	0.0018	0.0195	0.0017	0.0017	0.0018	0.0195	0.0018	0.0018	0.0018	0.0017	0.0018	0.0018	0.0017	0.0017	0.0018	0.0018	0.0198	0.0017	0.0017	0.0017	0.0017	0.0018	0.0018	0.0017	0.0204	0.0017	0.0018	0.0017	0.0017	0.0017	0.0017	0.0018	0.0018	0.0195	0.0018	0.0018	0.0018	0.0018	0.0018	0.0017	0.0018
[ 947] #CNPEB1740-14|KR251045|BIOUG10304-B10|Ctenosciara_hyalipennis|COI-5P	CNPEB1740-14	ENEA	0	0	0	0.0017	0.0018	0.0017	0.0017	0.0189	0.0017	0.0017	0.0017	0.0193	0.0018	0.0017	0.0018	0.0017	0.0018	0.0018	0.0017	0.0017	0.0017	0.0017	0.0193	0.0017	0.0017	0.0017	0.0017	0.0017	0.0018	0.0017	0.0202	0.0017	0.0018	0.0017	0.0017	0.0017	0.0017	0.0017	0.0017	0.0195	0.0018	0.0017	0.0018	0.0018	0.0018	0.0017	0.0017
[ 948] #CNPEB1745-14|KR241900|BIOUG10304-C03|Ctenosciara_hyalipennis|COI-5P	CNPEB1745-14	ENEA	0.0017	0.0017	0.0017	0	0	0	0	0.0176	0	0	0	0.0176	0	0	0	0	0	0	0	0	0	0	0.0179	0	0	0	0	0	0	0	0.0184	0	0	0	0	0	0	0	0	0.0177	0	0	0	0	0	0	0
[ 949] #CNPEB1746-14|KR253980|BIOUG10304-C04|Ctenosciara_hyalipennis|COI-5P	CNPEB1746-14	ENEA	0.0017	0.0017	0.0017	0	0	0	0	0.0172	0	0	0	0.0175	0	0	0	0	0	0	0	0	0	0	0.0175	0	0	0	0	0	0	0	0.0184	0	0	0	0	0	0	0	0	0.0177	0	0	0	0	0	0	0
[ 950] #CNPEB186-14|KR247428|BIOUG10217-G11|Ctenosciara_hyalipennis|COI-5P	CNPEB186-14	ENEA	0.0017	0.0017	0.0017	0	0	0	0	0.0172	0	0	0	0.0175	0	0	0	0	0	0	0	0	0	0	0.0175	0	0	0	0	0	0	0	0.0184	0	0	0	0	0	0	0	0	0.0177	0	0	0	0	0	0	0
[ 951] #CNPEB190-14|KR247188|BIOUG10217-H03|Ctenosciara_hyalipennis|COI-5P	CNPEB190-14	ENEA	0	0	0	0.0017	0.0018	0.0017	0.0017	0.0189	0.0017	0.0017	0.0017	0.0193	0.0018	0.0017	0.0018	0.0017	0.0018	0.0018	0.0017	0.0017	0.0017	0.0017	0.0193	0.0017	0.0017	0.0017	0.0017	0.0017	0.0018	0.0017	0.0202	0.0017	0.0018	0.0017	0.0017	0.0017	0.0017	0.0017	0.0017	0.0195	0.0018	0.0017	0.0018	0.0018	0.0018	0.0017	0.0017
[ 952] #CNPEB193-14|KR247500|BIOUG10217-H06|Ctenosciara_hyalipennis|COI-5P	CNPEB193-14	ENEA	0.0017	0.0017	0.0017	0	0	0	0	0.0172	0	0	0	0.0175	0	0	0	0	0	0	0	0	0	0	0.0175	0	0	0	0	0	0	0	0.0184	0	0	0	0	0	0	0	0	0.0177	0	0	0	0	0	0	0
[ 953] #CNPEB195-14|KR249091|BIOUG10217-H08|Ctenosciara_hyalipennis|COI-5P	CNPEB195-14	ENEA	0.0017	0.0017	0.0017	0	0	0	0	0.0175	0	0	0	0.018	0	0	0	0	0	0	0	0	0	0	0.0176	0	0	0	0	0	0	0	0.0184	0	0	0	0	0	0	0	0	0.0181	0	0	0	0	0	0	0
[ 954] #CNPEB200-14|KR239454|BIOUG10218-A02|Ctenosciara_hyalipennis|COI-5P	CNPEB200-14	ENEA	0.0017	0.0017	0.0017	0	0	0	0	0.0173	0	0	0	0.0175	0	0	0	0	0	0	0	0	0	0	0.0175	0	0	0	0	0	0	0	0.0184	0	0	0	0	0	0	0	0	0.0177	0	0	0	0	0	0	0
[ 955] #CNPEB201-14|KR256792|BIOUG10218-A03|Ctenosciara_hyalipennis|COI-5P	CNPEB201-14	ENEA	0.0018	0.0018	0.0018	0	0	0	0	0.0178	0	0	0	0.0178	0	0	0	0	0	0	0	0	0	0	0.0178	0	0	0	0	0	0	0	0.0184	0	0	0	0	0	0	0	0	0.018	0	0	0	0	0	0	0
[ 956] #CNPEB210-14|KR250562|BIOUG10218-A12|Ctenosciara_hyalipennis|COI-5P	CNPEB210-14	ENEA	0.0017	0.0017	0.0017	0	0	0	0	0.0175	0	0	0	0.0178	0	0	0	0	0	0	0	0	0	0	0.0175	0	0	0	0	0	0	0	0.0184	0	0	0	0	0	0	0	0	0.018	0	0	0	0	0	0	0
[ 957] #CNPEB211-14|KR237249|BIOUG10218-B01|Ctenosciara_hyalipennis|COI-5P	CNPEB211-14	ENEA	0.0017	0.0017	0.0017	0	0	0	0	0.0173	0	0	0	0.0175	0	0	0	0	0	0	0	0	0	0	0.0175	0	0	0	0	0	0	0	0.0184	0	0	0	0	0	0	0	0	0.0177	0	0	0	0	0	0	0
[ 958] #CNPEB214-14|KR247671|BIOUG10218-B04|Ctenosciara_hyalipennis|COI-5P	CNPEB214-14	ENEA	0.0017	0.0017	0.0017	0	0	0	0	0.0175	0	0	0	0.0175	0	0	0	0	0	0	0	0	0	0	0.0178	0	0	0	0	0	0	0	0.0184	0	0	0	0	0	0	0	0	0.0177	0	0	0	0	0	0	0
[ 959] #CNPEB225-14|KR238245|BIOUG10218-C03|Ctenosciara_hyalipennis|COI-5P	CNPEB225-14	ENEA	0.0017	0.0017	0.0017	0	0	0	0	0.0172	0	0	0	0.0175	0	0	0	0	0	0	0	0	0	0	0.0175	0	0	0	0	0	0	0	0.0184	0	0	0	0	0	0	0	0	0.0177	0	0	0	0	0	0	0
[ 960] #CNPEB241-14|KR236328|BIOUG10218-D07|Ctenosciara_hyalipennis|COI-5P	CNPEB241-14	ENEA	0.0017	0.0017	0.0017	0	0	0	0	0.0172	0	0	0	0.0175	0	0	0	0	0	0	0	0	0	0	0.0175	0	0	0	0	0	0	0	0.0184	0	0	0	0	0	0	0	0	0.0177	0	0	0	0	0	0	0
[ 961] #CNPEB245-14|KR243759|BIOUG10218-D11|Ctenosciara_hyalipennis|COI-5P	CNPEB245-14	ENEA	0.0017	0.0017	0.0017	0	0	0	0	0.0172	0	0	0	0.0175	0	0	0	0	0	0	0	0	0	0	0.0175	0	0	0	0	0	0	0	0.0184	0	0	0	0	0	0	0	0	0.0177	0	0	0	0	0	0	0
[ 962] #CNPEB247-14|KR256988|BIOUG10218-E01|Ctenosciara_hyalipennis|COI-5P	CNPEB247-14	ENEA	0	0	0	0.0018	0.0018	0.0018	0.0018	0.0196	0.0018	0.0018	0.0018	0.0196	0.0018	0.0018	0.0018	0.0018	0.0018	0.0018	0.0018	0.0018	0.0018	0.0018	0.0196	0.0018	0.0018	0.0018	0.0018	0.0018	0.0018	0.0018	0.0202	0.0018	0.0018	0.0018	0.0018	0.0018	0.0018	0.0018	0.0018	0.0198	0.0018	0.0018	0.0018	0.0018	0.0018	0.0018	0.0018
[ 963] #CNPEB248-14|KR256501|BIOUG10218-E02|Ctenosciara_hyalipennis|COI-5P	CNPEB248-14	ENEA	0.0017	0.0017	0.0017	0	0	0	0	0.0173	0	0	0	0.0175	0	0	0	0	0	0	0	0	0	0	0.0175	0	0	0	0	0	0	0	0.0184	0	0	0	0	0	0	0	0	0.0177	0	0	0	0	0	0	0
[ 964] #CNPEB250-14|KR239338|BIOUG10218-E04|Ctenosciara_hyalipennis|COI-5P	CNPEB250-14	ENEA	0.0018	0.0018	0.0018	0	0	0	0	0.0184	0	0	0	0.0184	0	0	0	0	0	0	0	0	0	0	0.0184	0	0	0	0	0	0	0	0.0189	0	0	0	0	0	0	0	0	0.0184	0	0	0	0	0	0	0
[ 965] #CNPEB252-14|KR241852|BIOUG10218-E06|Ctenosciara_hyalipennis|COI-5P	CNPEB252-14	ENEA	0.0017	0.0017	0.0017	0	0	0	0	0.0177	0	0	0	0.0177	0	0	0	0	0	0	0	0	0	0	0.0179	0	0	0	0	0	0	0	0.0185	0	0	0	0	0	0	0	0	0.0177	0	0	0	0	0	0	0
[ 966] #CNPEB258-14|KR242547|BIOUG10218-E12|Ctenosciara_hyalipennis|COI-5P	CNPEB258-14	ENEA	0	0	0	0.0017	0.0018	0.0017	0.0017	0.019	0.0017	0.0017	0.0017	0.0193	0.0018	0.0017	0.0018	0.0017	0.0018	0.0018	0.0017	0.0017	0.0017	0.0017	0.0193	0.0017	0.0017	0.0017	0.0017	0.0017	0.0018	0.0017	0.0202	0.0017	0.0018	0.0017	0.0017	0.0017	0.0017	0.0017	0.0017	0.0195	0.0018	0.0017	0.0018	0.0018	0.0018	0.0017	0.0017
[ 967] #CNPEB259-14|KR241030|BIOUG10218-F01|Ctenosciara_hyalipennis|COI-5P	CNPEB259-14	ENEA	0	0	0	0.0018	0.0018	0.0018	0.0018	0.0196	0.0018	0.0018	0.0018	0.0196	0.0018	0.0018	0.0018	0.0018	0.0018	0.0018	0.0018	0.0018	0.0018	0.0018	0.0196	0.0018	0.0018	0.0018	0.0018	0.0018	0.0018	0.0018	0.0202	0.0018	0.0018	0.0018	0.0018	0.0018	0.0018	0.0018	0.0018	0.0198	0.0018	0.0018	0.0018	0.0018	0.0018	0.0018	0.0018
[ 968] #CNPEB262-14|KR238640|BIOUG10218-F04|Ctenosciara_hyalipennis|COI-5P	CNPEB262-14	ENEA	0.0017	0.0017	0.0017	0	0	0	0	0.0175	0	0	0	0.0175	0	0	0	0	0	0	0	0	0	0	0.0178	0	0	0	0	0	0	0	0.0184	0	0	0	0	0	0	0	0	0.0177	0	0	0	0	0	0	0
[ 969] #CNPEB264-14|KR255077|BIOUG10218-F06|Ctenosciara_hyalipennis|COI-5P	CNPEB264-14	ENEA	0.0017	0.0017	0.0017	0	0	0	0	0.0175	0	0	0	0.0178	0	0	0	0	0	0	0	0	0	0	0.0175	0	0	0	0	0	0	0	0.0184	0	0	0	0	0	0	0	0	0.018	0	0	0	0	0	0	0
[ 970] #CNPEB271-14|KR252344|BIOUG10218-G01|Ctenosciara_hyalipennis|COI-5P	CNPEB271-14	ENEA	0	0	0	0.0017	0.0018	0.0017	0.0017	0.0192	0.0017	0.0017	0.0017	0.0196	0.0018	0.0017	0.0018	0.0017	0.0018	0.0018	0.0017	0.0018	0.0017	0.0017	0.0193	0.0017	0.0017	0.0017	0.0017	0.0017	0.0018	0.0017	0.0202	0.0017	0.0018	0.0017	0.0017	0.0018	0.0018	0.0017	0.0017	0.0198	0.0018	0.0017	0.0018	0.0018	0.0018	0.0017	0.0017
[ 971] #CNPEB275-14|KR235489|BIOUG10218-G05|Ctenosciara_hyalipennis|COI-5P	CNPEB275-14	ENEA	0	0	0	0.0017	0.0018	0.0017	0.0017	0.0189	0.0017	0.0017	0.0017	0.0193	0.0018	0.0017	0.0018	0.0017	0.0018	0.0018	0.0017	0.0017	0.0017	0.0017	0.0193	0.0017	0.0017	0.0017	0.0017	0.0017	0.0018	0.0017	0.0202	0.0017	0.0018	0.0017	0.0017	0.0017	0.0017	0.0017	0.0017	0.0195	0.0018	0.0017	0.0018	0.0018	0.0018	0.0017	0.0017
[ 972] #CNPEB286-14|KR249679|BIOUG10218-H04|Ctenosciara_hyalipennis|COI-5P	CNPEB286-14	ENEA	0	0	0	0.0017	0.0018	0.0017	0.0017	0.0191	0.0017	0.0017	0.0017	0.0193	0.0018	0.0017	0.0018	0.0017	0.0018	0.0018	0.0017	0.0017	0.0017	0.0017	0.0193	0.0017	0.0017	0.0017	0.0017	0.0017	0.0018	0.0017	0.0202	0.0017	0.0018	0.0017	0.0017	0.0017	0.0017	0.0017	0.0017	0.0195	0.0018	0.0017	0.0018	0.0018	0.0018	0.0017	0.0017
[ 973] #CNPEB288-14|KR243188|BIOUG10218-H06|Ctenosciara_hyalipennis|COI-5P	CNPEB288-14	ENEA	0.0017	0.0017	0.0017	0	0	0	0	0.0175	0	0	0	0.0178	0	0	0	0	0	0	0	0	0	0	0.0175	0	0	0	0	0	0	0	0.0184	0	0	0	0	0	0	0	0	0.018	0	0	0	0	0	0	0
[ 974] #CNPEB296-14|KR243184|BIOUG10219-A03|Ctenosciara_hyalipennis|COI-5P	CNPEB296-14	ENEA	0	0	0	0.0017	0.0018	0.0017	0.0017	0.019	0.0017	0.0017	0.0017	0.0193	0.0018	0.0017	0.0018	0.0017	0.0018	0.0018	0.0017	0.0017	0.0017	0.0017	0.0193	0.0017	0.0017	0.0017	0.0017	0.0017	0.0018	0.0017	0.0202	0.0017	0.0018	0.0017	0.0017	0.0017	0.0017	0.0017	0.0017	0.0195	0.0018	0.0017	0.0018	0.0018	0.0018	0.0017	0.0017
[ 975] #CNPEB297-14|KR250861|BIOUG10219-A04|Ctenosciara_hyalipennis|COI-5P	CNPEB297-14	ENEA	0.0018	0.0018	0.0018	0	0	0	0	0.0181	0	0	0	0.0181	0	0	0	0	0	0	0	0	0	0	0.0184	0	0	0	0	0	0	0	0.0189	0	0	0	0	0	0	0	0	0.0181	0	0	0	0	0	0	0
[ 976] #CNPEB308-14|KR236077|BIOUG10219-B03|Ctenosciara_hyalipennis|COI-5P	CNPEB308-14	ENEA	0	0	0	0.0017	0.0018	0.0017	0.0017	0.019	0.0017	0.0017	0.0017	0.0193	0.0018	0.0017	0.0018	0.0017	0.0018	0.0018	0.0017	0.0017	0.0017	0.0017	0.0193	0.0017	0.0017	0.0017	0.0017	0.0017	0.0018	0.0017	0.0202	0.0017	0.0018	0.0017	0.0017	0.0017	0.0017	0.0017	0.0017	0.0195	0.0018	0.0017	0.0018	0.0018	0.0018	0.0017	0.0017
[ 977] #CNPEB313-14|KR234508|BIOUG10219-B08|Ctenosciara_hyalipennis|COI-5P	CNPEB313-14	ENEA	0.0017	0.0017	0.0017	0	0	0	0	0.0172	0	0	0	0.0175	0	0	0	0	0	0	0	0	0	0	0.0175	0	0	0	0	0	0	0	0.0184	0	0	0	0	0	0	0	0	0.0177	0	0	0	0	0	0	0
[ 978] #CNPEB315-14|KR246178|BIOUG10219-B10|Ctenosciara_hyalipennis|COI-5P	CNPEB315-14	ENEA	0.0017	0.0017	0.0017	0	0	0	0	0.0175	0	0	0	0.0178	0	0	0	0	0	0	0	0	0	0	0.0175	0	0	0	0	0	0	0	0.0184	0	0	0	0	0	0	0	0	0.018	0	0	0	0	0	0	0
[ 979] #CNPEB333-14|KR242557|BIOUG10219-D04|Ctenosciara_hyalipennis|COI-5P	CNPEB333-14	ENEA	0.0017	0.0017	0.0017	0	0	0	0	0.0172	0	0	0	0.0175	0	0	0	0	0	0	0	0	0	0	0.0175	0	0	0	0	0	0	0	0.0184	0	0	0	0	0	0	0	0	0.0177	0	0	0	0	0	0	0
[ 980] #CNPEB346-14|KR242576|BIOUG10219-E05|Ctenosciara_hyalipennis|COI-5P	CNPEB346-14	ENEA	0.0018	0.0018	0.0018	0	0	0	0	0.018	0	0	0	0.018	0	0	0	0	0	0	0	0	0	0	0.018	0	0	0	0	0	0	0	0.0184	0	0	0	0	0	0	0	0	0.0181	0	0	0	0	0	0	0
[ 981] #CNPEB349-14|KR255997|BIOUG10219-E08|Ctenosciara_hyalipennis|COI-5P	CNPEB349-14	ENEA	0.0017	0.0017	0.0017	0	0	0	0	0.0177	0	0	0	0.0177	0	0	0	0	0	0	0	0	0	0	0.0179	0	0	0	0	0	0	0	0.0185	0	0	0	0	0	0	0	0	0.0177	0	0	0	0	0	0	0
[ 982] #CNPEB350-14|KR255276|BIOUG10219-E09|Ctenosciara_hyalipennis|COI-5P	CNPEB350-14	ENEA	0	0	0	0.0019	0.0019	0.0018	0.0019	0.0186	0.0018	0.0018	0.0019	0.0186	0.0019	0.0019	0.0019	0.0018	0.0019	0.0019	0.0018	0.0018	0.0019	0.0019	0.0188	0.0018	0.0018	0.0018	0.0018	0.0019	0.0019	0.0018	0.0195	0.0018	0.0019	0.0018	0.0018	0.0018	0.0018	0.0019	0.0019	0.0186	0.0019	0.0019	0.0019	0.0019	0.0019	0.0018	0.0019
[ 983] #CNPEB360-14|KR251573|BIOUG10219-F07|Ctenosciara_hyalipennis|COI-5P	CNPEB360-14	ENEA	0	0	0	0.0018	0.0018	0.0018	0.0018	0.0199	0.0018	0.0018	0.0018	0.0204	0.0018	0.0018	0.0018	0.0018	0.0018	0.0018	0.0018	0.0018	0.0018	0.0018	0.02	0.0018	0.0018	0.0018	0.0018	0.0018	0.0018	0.0018	0.0204	0.0018	0.0018	0.0018	0.0018	0.0018	0.0018	0.0018	0.0018	0.0206	0.0018	0.0018	0.0018	0.0018	0.0018	0.0018	0.0018
[ 984] #CNPEB365-14|KR255635|BIOUG10219-F12|Ctenosciara_hyalipennis|COI-5P	CNPEB365-14	ENEA	0	0	0	0.0017	0.0018	0.0017	0.0017	0.0191	0.0017	0.0017	0.0017	0.0193	0.0018	0.0017	0.0018	0.0017	0.0018	0.0018	0.0017	0.0017	0.0017	0.0017	0.0193	0.0017	0.0017	0.0017	0.0017	0.0017	0.0018	0.0017	0.0202	0.0017	0.0018	0.0017	0.0017	0.0017	0.0017	0.0017	0.0017	0.0195	0.0018	0.0017	0.0018	0.0018	0.0018	0.0017	0.0017
[ 985] #CNPEB385-14|KR252523|BIOUG10219-H08|Ctenosciara_hyalipennis|COI-5P	CNPEB385-14	ENEA	0.0018	0.0018	0.0018	0	0	0	0	0.0178	0	0	0	0.0181	0	0	0	0	0	0	0	0	0	0	0.0178	0	0	0	0	0	0	0	0.0184	0	0	0	0	0	0	0	0	0.0183	0	0	0	0	0	0	0
[ 986] #CNPEB389-14|KR257568|BIOUG10220-A01|Ctenosciara_hyalipennis|COI-5P	CNPEB389-14	ENEA	0.0017	0.0017	0.0017	0	0	0	0	0.0177	0	0	0	0.0177	0	0	0	0	0	0	0	0	0	0	0.0179	0	0	0	0	0	0	0	0.0185	0	0	0	0	0	0	0	0	0.0177	0	0	0	0	0	0	0
[ 987] #CNPEB390-14|KR241702|BIOUG10220-A02|Ctenosciara_hyalipennis|COI-5P	CNPEB390-14	ENEA	0	0	0	0.0018	0.0019	0.0018	0.0018	0.0199	0.0018	0.0018	0.0018	0.0199	0.0019	0.0018	0.0018	0.0018	0.0018	0.0019	0.0018	0.0018	0.0018	0.0018	0.0202	0.0018	0.0018	0.0018	0.0018	0.0018	0.0019	0.0018	0.0209	0.0018	0.0019	0.0018	0.0018	0.0018	0.0018	0.0018	0.0018	0.0199	0.0019	0.0018	0.0018	0.0019	0.0019	0.0018	0.0018
[ 988] #CNPEB393-14|KR245881|BIOUG10220-A05|Ctenosciara_hyalipennis|COI-5P	CNPEB393-14	ENEA	0.0018	0.0018	0.0018	0	0	0	0	0.0167	0	0	0	0.0167	0	0	0	0	0	0	0	0	0	0	0.017	0	0	0	0	0	0	0	0.0175	0	0	0	0	0	0	0	0	0.0167	0	0	0	0	0	0	0
[ 989] #CNPEB396-14|KR253186|BIOUG10220-A08|Ctenosciara_hyalipennis|COI-5P	CNPEB396-14	ENEA	0.0017	0.0017	0.0017	0	0	0	0	0.0175	0	0	0	0.0178	0	0	0	0	0	0	0	0	0	0	0.0175	0	0	0	0	0	0	0	0.0184	0	0	0	0	0	0	0	0	0.018	0	0	0	0	0	0	0
[ 990] #CNPEB402-14|KR257552|BIOUG10220-B02|Ctenosciara_hyalipennis|COI-5P	CNPEB402-14	ENEA	0	0	0	0.0018	0.0019	0.0018	0.0018	0.0202	0.0018	0.0018	0.0018	0.0202	0.0019	0.0018	0.0018	0.0018	0.0018	0.0019	0.0018	0.0018	0.0018	0.0018	0.0205	0.0018	0.0018	0.0018	0.0018	0.0018	0.0019	0.0018	0.0211	0.0018	0.0019	0.0018	0.0018	0.0018	0.0018	0.0018	0.0018	0.0202	0.0019	0.0018	0.0018	0.0019	0.0019	0.0018	0.0018
[ 991] #CNPEB406-14|KR242841|BIOUG10220-B06|Ctenosciara_hyalipennis|COI-5P	CNPEB406-14	ENEA	0.0018	0.0018	0.0018	0	0	0	0	0.0166	0	0	0	0.0166	0	0	0	0	0	0	0	0	0	0	0.0169	0	0	0	0	0	0	0	0.0174	0	0	0	0	0	0	0	0	0.0166	0	0	0	0	0	0	0
[ 992] #CNPEB415-14|KR252826|BIOUG10220-C03|Ctenosciara_hyalipennis|COI-5P	CNPEB415-14	ENEA	0	0	0	0.0018	0.0018	0.0017	0.0018	0.0195	0.0017	0.0017	0.0018	0.0195	0.0018	0.0018	0.0018	0.0017	0.0018	0.0018	0.0017	0.0017	0.0018	0.0018	0.0198	0.0017	0.0017	0.0017	0.0017	0.0018	0.0018	0.0017	0.0204	0.0017	0.0018	0.0017	0.0017	0.0017	0.0017	0.0018	0.0018	0.0195	0.0018	0.0018	0.0018	0.0018	0.0018	0.0017	0.0018
[ 993] #CNPEB422-14|KR251805|BIOUG10220-C10|Ctenosciara_hyalipennis|COI-5P	CNPEB422-14	ENEA	0.0017	0.0017	0.0017	0	0	0	0	0.0177	0	0	0	0.0177	0	0	0	0	0	0	0	0	0	0	0.0179	0	0	0	0	0	0	0	0.0185	0	0	0	0	0	0	0	0	0.0177	0	0	0	0	0	0	0
[ 994] #CNPEB424-14|KR240189|BIOUG10220-C12|Ctenosciara_hyalipennis|COI-5P	CNPEB424-14	ENEA	0	0	0	0.0018	0.0018	0.0017	0.0018	0.0195	0.0017	0.0017	0.0018	0.0195	0.0018	0.0018	0.0018	0.0017	0.0018	0.0018	0.0017	0.0017	0.0018	0.0018	0.0198	0.0017	0.0017	0.0017	0.0017	0.0018	0.0018	0.0017	0.0204	0.0017	0.0018	0.0017	0.0017	0.0017	0.0017	0.0018	0.0018	0.0195	0.0018	0.0018	0.0018	0.0018	0.0018	0.0017	0.0018
[ 995] #CNPEB428-14|KR249897|BIOUG10220-D04|Ctenosciara_hyalipennis|COI-5P	CNPEB428-14	ENEA	0	0	0	0.0018	0.0018	0.0017	0.0018	0.0194	0.0017	0.0017	0.0018	0.0194	0.0018	0.0018	0.0018	0.0017	0.0018	0.0018	0.0017	0.0017	0.0018	0.0018	0.0197	0.0017	0.0017	0.0017	0.0017	0.0018	0.0018	0.0017	0.0203	0.0017	0.0018	0.0017	0.0017	0.0017	0.0017	0.0018	0.0018	0.0195	0.0018	0.0018	0.0018	0.0018	0.0018	0.0017	0.0018
[ 996] #CNPEB453-14|KR245316|BIOUG10220-F05|Ctenosciara_hyalipennis|COI-5P	CNPEB453-14	ENEA	0.0017	0.0017	0.0017	0	0	0	0	0.0177	0	0	0	0.0177	0	0	0	0	0	0	0	0	0	0	0.018	0	0	0	0	0	0	0	0.0185	0	0	0	0	0	0	0	0	0.0177	0	0	0	0	0	0	0
[ 997] #CNPEB457-14|KR250986|BIOUG10220-F09|Ctenosciara_hyalipennis|COI-5P	CNPEB457-14	ENEA	0.0018	0.0018	0.0018	0	0	0	0	0.0181	0	0	0	0.0181	0	0	0	0	0	0	0	0	0	0	0.0184	0	0	0	0	0	0	0	0.0189	0	0	0	0	0	0	0	0	0.0181	0	0	0	0	0	0	0
[ 998] #CNPEB463-14|KR249880|BIOUG10220-G03|Ctenosciara_hyalipennis|COI-5P	CNPEB463-14	ENEA	0.0017	0.0017	0.0017	0	0	0	0	0.0175	0	0	0	0.0175	0	0	0	0	0	0	0	0	0	0	0.0178	0	0	0	0	0	0	0	0.0184	0	0	0	0	0	0	0	0	0.0177	0	0	0	0	0	0	0
[ 999] #CNPEB480-14|KR244421|BIOUG10220-H08|Ctenosciara_hyalipennis|COI-5P	CNPEB480-14	ENEA	0.0018	0.0018	0.0018	0	0	0	0	0.0167	0	0	0	0.0167	0	0	0	0	0	0	0	0	0	0	0.0169	0	0	0	0	0	0	0	0.0175	0	0	0	0	0	0	0	0	0.0167	0	0	0	0	0	0	0
[1000] #CNPEB484-14|KR249339|BIOUG10261-A01|Ctenosciara_hyalipennis|COI-5P	CNPEB484-14	ENEA	0.0017	0.0017	0.0017	0	0	0	0	0.0176	0	0	0	0.0176	0	0	0	0	0	0	0	0	0	0	0.0179	0	0	0	0	0	0	0	0.0185	0	0	0	0	0	0	0	0	0.0177	0	0	0	0	0	0	0
[1001] #CNPEB493-14|KR258213|BIOUG10261-A10|Ctenosciara_hyalipennis|COI-5P	CNPEB493-14	ENEA	0.0018	0.0018	0.0018	0	0	0	0	0.018	0	0	0	0.018	0	0	0	0	0	0	0	0	0	0	0.018	0	0	0	0	0	0	0	0.0185	0	0	0	0	0	0	0	0	0.018	0	0	0	0	0	0	0
[1002] #CNPEB507-14|KR246996|BIOUG10261-B12|Ctenosciara_hyalipennis|COI-5P	CNPEB507-14	ENEA	0	0	0	0.0018	0.0018	0.0017	0.0018	0.0194	0.0017	0.0017	0.0018	0.0194	0.0018	0.0018	0.0018	0.0017	0.0018	0.0018	0.0017	0.0017	0.0018	0.0018	0.0197	0.0017	0.0017	0.0017	0.0017	0.0018	0.0018	0.0017	0.0203	0.0017	0.0018	0.0017	0.0017	0.0017	0.0017	0.0018	0.0018	0.0195	0.0018	0.0018	0.0018	0.0018	0.0018	0.0017	0.0018
[1003] #CNPEB512-14|KR250143|BIOUG10261-C05|Ctenosciara_hyalipennis|COI-5P	CNPEB512-14	ENEA	0.0018	0.0018	0.0018	0	0	0	0	0.0183	0	0	0	0.0183	0	0	0	0	0	0	0	0	0	0	0.0186	0	0	0	0	0	0	0	0.0192	0	0	0	0	0	0	0	0	0.0183	0	0	0	0	0	0	0
[1004] #CNPEB518-14|KR242884|BIOUG10261-C11|Ctenosciara_hyalipennis|COI-5P	CNPEB518-14	ENEA	0.0017	0.0017	0.0017	0	0	0	0	0.0177	0	0	0	0.0177	0	0	0	0	0	0	0	0	0	0	0.0179	0	0	0	0	0	0	0	0.0185	0	0	0	0	0	0	0	0	0.0177	0	0	0	0	0	0	0
[1005] #CNPEB521-14|KR257537|BIOUG10261-D02|Ctenosciara_hyalipennis|COI-5P	CNPEB521-14	ENEA	0.0017	0.0017	0.0017	0	0	0	0	0.0172	0	0	0	0.0175	0	0	0	0	0	0	0	0	0	0	0.0175	0	0	0	0	0	0	0	0.0184	0	0	0	0	0	0	0	0	0.0177	0	0	0	0	0	0	0
[1006] #CNPEB522-14|KR239635|BIOUG10261-D03|Ctenosciara_hyalipennis|COI-5P	CNPEB522-14	ENEA	0	0	0	0.0018	0.0018	0.0017	0.0018	0.0195	0.0017	0.0017	0.0018	0.0195	0.0018	0.0018	0.0018	0.0017	0.0018	0.0018	0.0017	0.0017	0.0018	0.0018	0.0198	0.0017	0.0017	0.0017	0.0017	0.0018	0.0018	0.0017	0.0204	0.0017	0.0018	0.0017	0.0017	0.0017	0.0017	0.0018	0.0018	0.0195	0.0018	0.0018	0.0018	0.0018	0.0018	0.0017	0.0018
[1007] #CNPEB532-14|KR249924|BIOUG10261-E01|Ctenosciara_hyalipennis|COI-5P	CNPEB532-14	ENEA	0.0017	0.0017	0.0017	0	0	0	0	0.0177	0	0	0	0.0177	0	0	0	0	0	0	0	0	0	0	0.0179	0	0	0	0	0	0	0	0.0185	0	0	0	0	0	0	0	0	0.0177	0	0	0	0	0	0	0
[1008] #CNPEB533-14|KR247596|BIOUG10261-E02|Ctenosciara_hyalipennis|COI-5P	CNPEB533-14	ENEA	0.0017	0.0017	0.0017	0	0	0	0	0.0172	0	0	0	0.0175	0	0	0	0	0	0	0	0	0	0	0.0175	0	0	0	0	0	0	0	0.0184	0	0	0	0	0	0	0	0	0.0177	0	0	0	0	0	0	0
[1009] #CNPEB543-14|KR256997|BIOUG10261-E12|Ctenosciara_hyalipennis|COI-5P	CNPEB543-14	ENEA	0.0017	0.0017	0.0017	0	0	0	0	0.0177	0	0	0	0.0177	0	0	0	0	0	0	0	0	0	0	0.0179	0	0	0	0	0	0	0	0.0185	0	0	0	0	0	0	0	0	0.0177	0	0	0	0	0	0	0
[1010] #CNPEB546-14|KR240945|BIOUG10261-F03|Ctenosciara_hyalipennis|COI-5P	CNPEB546-14	ENEA	0.0017	0.0017	0.0017	0	0	0	0	0.0176	0	0	0	0.0176	0	0	0	0	0	0	0	0	0	0	0.0179	0	0	0	0	0	0	0	0.0184	0	0	0	0	0	0	0	0	0.0177	0	0	0	0	0	0	0
[1011] #CNPEB547-14|KR250484|BIOUG10261-F04|Ctenosciara_hyalipennis|COI-5P	CNPEB547-14	ENEA	0	0	0	0.0019	0.0019	0.0019	0.0019	0.0188	0.0019	0.0019	0.0019	0.0188	0.0019	0.0019	0.0019	0.0019	0.0019	0.0019	0.0019	0.0019	0.0019	0.0019	0.0188	0.0019	0.0019	0.0019	0.0019	0.0019	0.0019	0.0019	0.0194	0.0019	0.0019	0.0019	0.0019	0.0019	0.0019	0.0019	0.0019	0.0188	0.0019	0.0019	0.0019	0.0019	0.0019	0.0019	0.0019
[1012] #CNPEB552-14|KR241120|BIOUG10261-F09|Ctenosciara_hyalipennis|COI-5P	CNPEB552-14	ENEA	0.0018	0.0018	0.0018	0	0	0	0	0.0182	0	0	0	0.0182	0	0	0	0	0	0	0	0	0	0	0.0185	0	0	0	0	0	0	0	0.0191	0	0	0	0	0	0	0	0	0.0182	0	0	0	0	0	0	0
[1013] #CNPEB553-14|KR974030|BIOUG10261-F10|Ctenosciara_hyalipennis|COI-5P	CNPEB553-14	ENEA	0.0019	0.0019	0.0019	0	0	0	0	0.0178	0	0	0	0.0178	0	0	0	0	0	0	0	0	0	0	0.018	0	0	0	0	0	0	0	0.0187	0	0	0	0	0	0	0	0	0.0178	0	0	0	0	0	0	0
[1014] #CNPEB556-14|KR252951|BIOUG10261-G01|Ctenosciara_hyalipennis|COI-5P	CNPEB556-14	ENEA	0	0	0	0.0018	0.0018	0.0017	0.0018	0.0195	0.0017	0.0017	0.0018	0.0195	0.0018	0.0018	0.0018	0.0017	0.0018	0.0018	0.0017	0.0017	0.0018	0.0018	0.0198	0.0017	0.0017	0.0017	0.0017	0.0018	0.0018	0.0017	0.0204	0.0017	0.0018	0.0017	0.0017	0.0017	0.0017	0.0018	0.0018	0.0195	0.0018	0.0018	0.0018	0.0018	0.0018	0.0017	0.0018
[1015] #CNPEB561-14|KR254194|BIOUG10261-G06|Ctenosciara_hyalipennis|COI-5P	CNPEB561-14	ENEA	0	0	0	0.0019	0.0019	0.0018	0.0019	0.0185	0.0018	0.0018	0.0019	0.0185	0.0019	0.0019	0.0019	0.0018	0.0019	0.0019	0.0018	0.0018	0.0019	0.0019	0.0188	0.0018	0.0018	0.0018	0.0018	0.0019	0.0019	0.0018	0.0194	0.0018	0.0019	0.0018	0.0018	0.0018	0.0018	0.0019	0.0019	0.0185	0.0019	0.0019	0.0019	0.0019	0.0019	0.0018	0.0019
[1016] #CNPEB567-14|KR256036|BIOUG10261-G12|Ctenosciara_hyalipennis|COI-5P	CNPEB567-14	ENEA	0.0017	0.0017	0.0017	0	0	0	0	0.0177	0	0	0	0.0177	0	0	0	0	0	0	0	0	0	0	0.0179	0	0	0	0	0	0	0	0.0185	0	0	0	0	0	0	0	0	0.0177	0	0	0	0	0	0	0
[1017] #CNPEB572-14|KR251456|BIOUG10261-H05|Ctenosciara_hyalipennis|COI-5P	CNPEB572-14	ENEA	0.0019	0.0019	0.0019	0	0	0	0	0.0171	0	0	0	0.0171	0	0	0	0	0	0	0	0	0	0	0.0174	0	0	0	0	0	0	0	0.018	0	0	0	0	0	0	0	0	0.0171	0	0	0	0	0	0	0
[1018] #CNPEB580-14|KR241577|BIOUG10262-A02|Ctenosciara_hyalipennis|COI-5P	CNPEB580-14	ENEA	0.0017	0.0017	0.0017	0	0	0	0	0.0172	0	0	0	0.0175	0	0	0	0	0	0	0	0	0	0	0.0175	0	0	0	0	0	0	0	0.0184	0	0	0	0	0	0	0	0	0.0177	0	0	0	0	0	0	0
[1019] #CNPEB587-14|KR254577|BIOUG10262-A09|Ctenosciara_hyalipennis|COI-5P	CNPEB587-14	ENEA	0	0	0	0.0018	0.0018	0.0017	0.0018	0.0193	0.0017	0.0017	0.0018	0.0193	0.0018	0.0018	0.0018	0.0017	0.0018	0.0018	0.0017	0.0017	0.0018	0.0018	0.0196	0.0017	0.0017	0.0017	0.0017	0.0018	0.0018	0.0017	0.0202	0.0017	0.0018	0.0017	0.0017	0.0017	0.0017	0.0018	0.0018	0.0195	0.0018	0.0018	0.0018	0.0018	0.0018	0.0017	0.0018
[1020] #CNPEB595-14|KR257498|BIOUG10262-B05|Ctenosciara_hyalipennis|COI-5P	CNPEB595-14	ENEA	0.0017	0.0017	0.0017	0	0	0	0	0.0172	0	0	0	0.0175	0	0	0	0	0	0	0	0	0	0	0.0175	0	0	0	0	0	0	0	0.0184	0	0	0	0	0	0	0	0	0.0177	0	0	0	0	0	0	0
[1021] #CNPEB599-14|KR254778|BIOUG10262-B09|Ctenosciara_hyalipennis|COI-5P	CNPEB599-14	ENEA	0	0	0	0.0018	0.0018	0.0017	0.0018	0.0195	0.0017	0.0017	0.0018	0.0195	0.0018	0.0018	0.0018	0.0017	0.0018	0.0018	0.0017	0.0017	0.0018	0.0018	0.0198	0.0017	0.0017	0.0017	0.0017	0.0018	0.0018	0.0017	0.0204	0.0017	0.0018	0.0017	0.0017	0.0017	0.0017	0.0018	0.0018	0.0195	0.0018	0.0018	0.0018	0.0018	0.0018	0.0017	0.0018
[1022] #CNPEB600-14|KR251492|BIOUG10262-B10|Ctenosciara_hyalipennis|COI-5P	CNPEB600-14	ENEA	0.0017	0.0017	0.0017	0	0	0	0	0.0172	0	0	0	0.0175	0	0	0	0	0	0	0	0	0	0	0.0175	0	0	0	0	0	0	0	0.0184	0	0	0	0	0	0	0	0	0.0177	0	0	0	0	0	0	0
[1023] #CNPEB607-14|KR243397|BIOUG10262-C05|Ctenosciara_hyalipennis|COI-5P	CNPEB607-14	ENEA	0	0	0	0.0018	0.0019	0.0018	0.0018	0.0202	0.0018	0.0018	0.0018	0.0202	0.0019	0.0018	0.0018	0.0018	0.0018	0.0019	0.0018	0.0018	0.0018	0.0018	0.0205	0.0018	0.0018	0.0018	0.0018	0.0018	0.0019	0.0018	0.0211	0.0018	0.0019	0.0018	0.0018	0.0018	0.0018	0.0018	0.0018	0.0202	0.0019	0.0018	0.0018	0.0019	0.0019	0.0018	0.0018
[1024] #CNPEB613-14|KR245053|BIOUG10262-C11|Ctenosciara_hyalipennis|COI-5P	CNPEB613-14	ENEA	0.0018	0.0018	0.0018	0	0	0	0	0.0183	0	0	0	0.0183	0	0	0	0	0	0	0	0	0	0	0.0186	0	0	0	0	0	0	0	0.0192	0	0	0	0	0	0	0	0	0.0183	0	0	0	0	0	0	0
[1025] #CNPEB614-14|KR256256|BIOUG10262-C12|Ctenosciara_hyalipennis|COI-5P	CNPEB614-14	ENEA	0.0017	0.0017	0.0017	0	0	0	0	0.0172	0	0	0	0.0175	0	0	0	0	0	0	0	0	0	0	0.0175	0	0	0	0	0	0	0	0.0184	0	0	0	0	0	0	0	0	0.0177	0	0	0	0	0	0	0
[1026] #CNPEB620-14|KR252361|BIOUG10262-D06|Ctenosciara_hyalipennis|COI-5P	CNPEB620-14	ENEA	0.0017	0.0017	0.0017	0	0	0	0	0.0172	0	0	0	0.0175	0	0	0	0	0	0	0	0	0	0	0.0175	0	0	0	0	0	0	0	0.0184	0	0	0	0	0	0	0	0	0.0177	0	0	0	0	0	0	0
[1027] #CNPEB623-14|KR258341|BIOUG10262-D09|Ctenosciara_hyalipennis|COI-5P	CNPEB623-14	ENEA	0.0017	0.0017	0.0017	0	0	0	0	0.0175	0	0	0	0.0175	0	0	0	0	0	0	0	0	0	0	0.0178	0	0	0	0	0	0	0	0.0184	0	0	0	0	0	0	0	0	0.0177	0	0	0	0	0	0	0
[1028] #CNPEB624-14|KR255230|BIOUG10262-D10|Ctenosciara_hyalipennis|COI-5P	CNPEB624-14	ENEA	0.0017	0.0017	0.0017	0	0	0	0	0.0172	0	0	0	0.0175	0	0	0	0	0	0	0	0	0	0	0.0175	0	0	0	0	0	0	0	0.0184	0	0	0	0	0	0	0	0	0.0177	0	0	0	0	0	0	0
[1029] #CNPEB625-14|KR236707|BIOUG10262-D11|Ctenosciara_hyalipennis|COI-5P	CNPEB625-14	ENEA	0.0017	0.0017	0.0017	0	0	0	0	0.0172	0	0	0	0.0175	0	0	0	0	0	0	0	0	0	0	0.0175	0	0	0	0	0	0	0	0.0184	0	0	0	0	0	0	0	0	0.0177	0	0	0	0	0	0	0
[1030] #CNPEB628-14|KR251963|BIOUG10262-E02|Ctenosciara_hyalipennis|COI-5P	CNPEB628-14	ENEA	0.0018	0.0018	0.0018	0	0	0	0	0.0181	0	0	0	0.0181	0	0	0	0	0	0	0	0	0	0	0.0184	0	0	0	0	0	0	0	0.0189	0	0	0	0	0	0	0	0	0.0181	0	0	0	0	0	0	0
[1031] #CNPEB637-14|KR249569|BIOUG10262-E11|Ctenosciara_hyalipennis|COI-5P	CNPEB637-14	ENEA	0	0	0	0.0017	0.0018	0.0017	0.0017	0.019	0.0017	0.0017	0.0017	0.0193	0.0018	0.0017	0.0018	0.0017	0.0018	0.0018	0.0017	0.0017	0.0017	0.0017	0.0193	0.0017	0.0017	0.0017	0.0017	0.0017	0.0018	0.0017	0.0202	0.0017	0.0018	0.0017	0.0017	0.0017	0.0017	0.0017	0.0017	0.0195	0.0018	0.0017	0.0018	0.0018	0.0018	0.0017	0.0017
[1032] #CNPEB638-14|KR241631|BIOUG10262-E12|Ctenosciara_hyalipennis|COI-5P	CNPEB638-14	ENEA	0	0	0	0.0018	0.0018	0.0017	0.0018	0.0193	0.0017	0.0017	0.0018	0.0193	0.0018	0.0018	0.0018	0.0017	0.0018	0.0018	0.0017	0.0017	0.0018	0.0018	0.0196	0.0017	0.0017	0.0017	0.0017	0.0018	0.0018	0.0017	0.0202	0.0017	0.0018	0.0017	0.0017	0.0017	0.0017	0.0018	0.0018	0.0195	0.0018	0.0018	0.0018	0.0018	0.0018	0.0017	0.0018
[1033] #CNPEB639-14|KR247468|BIOUG10262-F01|Ctenosciara_hyalipennis|COI-5P	CNPEB639-14	ENEA	0	0	0	0.0017	0.0018	0.0017	0.0017	0.019	0.0017	0.0017	0.0017	0.0193	0.0018	0.0017	0.0018	0.0017	0.0018	0.0018	0.0017	0.0017	0.0017	0.0017	0.0193	0.0017	0.0017	0.0017	0.0017	0.0017	0.0018	0.0017	0.0202	0.0017	0.0018	0.0017	0.0017	0.0017	0.0017	0.0017	0.0017	0.0195	0.0018	0.0017	0.0018	0.0018	0.0018	0.0017	0.0017
[1034] #CNPEB648-14|KR257555|BIOUG10262-F10|Ctenosciara_hyalipennis|COI-5P	CNPEB648-14	ENEA	0.0017	0.0017	0.0017	0	0	0	0	0.0172	0	0	0	0.0175	0	0	0	0	0	0	0	0	0	0	0.0175	0	0	0	0	0	0	0	0.0184	0	0	0	0	0	0	0	0	0.0177	0	0	0	0	0	0	0
[1035] #CNPEB655-14|KR237885|BIOUG10262-G05|Ctenosciara_hyalipennis|COI-5P	CNPEB655-14	ENEA	0	0	0	0.0018	0.0019	0.0018	0.0018	0.0199	0.0018	0.0018	0.0018	0.0199	0.0019	0.0018	0.0018	0.0018	0.0018	0.0019	0.0018	0.0018	0.0018	0.0018	0.0202	0.0018	0.0018	0.0018	0.0018	0.0018	0.0019	0.0018	0.0209	0.0018	0.0019	0.0018	0.0018	0.0018	0.0018	0.0018	0.0018	0.0199	0.0019	0.0018	0.0018	0.0019	0.0019	0.0018	0.0018
[1036] #CNPEB675-14|KR240352|BIOUG10263-A02|Ctenosciara_hyalipennis|COI-5P	CNPEB675-14	ENEA	0	0	0	0.0018	0.0018	0.0017	0.0018	0.0193	0.0017	0.0017	0.0018	0.0193	0.0018	0.0018	0.0018	0.0017	0.0018	0.0018	0.0017	0.0017	0.0018	0.0018	0.0196	0.0017	0.0017	0.0017	0.0017	0.0018	0.0018	0.0017	0.0202	0.0017	0.0018	0.0017	0.0017	0.0017	0.0017	0.0018	0.0018	0.0195	0.0018	0.0018	0.0018	0.0018	0.0018	0.0017	0.0018
[1037] #CNPEB689-14|KR234838|BIOUG10263-B04|Ctenosciara_hyalipennis|COI-5P	CNPEB689-14	ENEA	0.0017	0.0017	0.0017	0	0	0	0	0.0176	0	0	0	0.0176	0	0	0	0	0	0	0	0	0	0	0.0179	0	0	0	0	0	0	0	0.0185	0	0	0	0	0	0	0	0	0.0177	0	0	0	0	0	0	0
[1038] #CNPEB699-14|KR236571|BIOUG10263-C02|Ctenosciara_hyalipennis|COI-5P	CNPEB699-14	ENEA	0.0017	0.0017	0.0017	0	0	0	0	0.0172	0	0	0	0.0175	0	0	0	0	0	0	0	0	0	0	0.0175	0	0	0	0	0	0	0	0.0184	0	0	0	0	0	0	0	0	0.0177	0	0	0	0	0	0	0
[1039] #CNPEB700-14|KR244485|BIOUG10263-C03|Ctenosciara_hyalipennis|COI-5P	CNPEB700-14	ENEA	0.0017	0.0017	0.0017	0	0	0	0	0.0172	0	0	0	0.0175	0	0	0	0	0	0	0	0	0	0	0.0175	0	0	0	0	0	0	0	0.0184	0	0	0	0	0	0	0	0	0.0177	0	0	0	0	0	0	0
[1040] #CNPEB702-14|KR256503|BIOUG10263-C05|Ctenosciara_hyalipennis|COI-5P	CNPEB702-14	ENEA	0.0017	0.0017	0.0017	0	0	0	0	0.0172	0	0	0	0.0175	0	0	0	0	0	0	0	0	0	0	0.0175	0	0	0	0	0	0	0	0.0184	0	0	0	0	0	0	0	0	0.0177	0	0	0	0	0	0	0
[1041] #CNPEB704-14|KR239212|BIOUG10263-C07|Ctenosciara_hyalipennis|COI-5P	CNPEB704-14	ENEA	0	0	0	0.0017	0.0018	0.0017	0.0017	0.019	0.0017	0.0017	0.0017	0.0193	0.0018	0.0017	0.0018	0.0017	0.0018	0.0018	0.0017	0.0017	0.0017	0.0017	0.0193	0.0017	0.0017	0.0017	0.0017	0.0017	0.0018	0.0017	0.0202	0.0017	0.0018	0.0017	0.0017	0.0017	0.0017	0.0017	0.0017	0.0195	0.0018	0.0017	0.0018	0.0018	0.0018	0.0017	0.0017
[1042] #CNPEB723-14|KR250535|BIOUG10263-E02|Ctenosciara_hyalipennis|COI-5P	CNPEB723-14	ENEA	0	0	0	0.0018	0.0018	0.0017	0.0018	0.0193	0.0017	0.0017	0.0018	0.0193	0.0018	0.0018	0.0018	0.0017	0.0018	0.0018	0.0017	0.0017	0.0018	0.0018	0.0196	0.0017	0.0017	0.0017	0.0017	0.0018	0.0018	0.0017	0.0202	0.0017	0.0018	0.0017	0.0017	0.0017	0.0017	0.0018	0.0018	0.0195	0.0018	0.0018	0.0018	0.0018	0.0018	0.0017	0.0018
[1043] #CNPEB747-14|KR255973|BIOUG10263-G02|Ctenosciara_hyalipennis|COI-5P	CNPEB747-14	ENEA	0.0017	0.0017	0.0017	0	0	0	0	0.0172	0	0	0	0.0175	0	0	0	0	0	0	0	0	0	0	0.0175	0	0	0	0	0	0	0	0.0184	0	0	0	0	0	0	0	0	0.0177	0	0	0	0	0	0	0
[1044] #CNPEB752-14|KR239426|BIOUG10263-G07|Ctenosciara_hyalipennis|COI-5P	CNPEB752-14	ENEA	0.0018	0.0018	0.0018	0	0	0	0	0.0183	0	0	0	0.0183	0	0	0	0	0	0	0	0	0	0	0.0186	0	0	0	0	0	0	0	0.0192	0	0	0	0	0	0	0	0	0.0183	0	0	0	0	0	0	0
[1045] #CNPEB755-14|KR255227|BIOUG10263-G10|Ctenosciara_hyalipennis|COI-5P	CNPEB755-14	ENEA	0.0017	0.0017	0.0017	0	0	0	0	0.0173	0	0	0	0.0175	0	0	0	0	0	0	0	0	0	0	0.0175	0	0	0	0	0	0	0	0.0184	0	0	0	0	0	0	0	0	0.0177	0	0	0	0	0	0	0
[1046] #CNPEB756-14|KR237147|BIOUG10263-G11|Ctenosciara_hyalipennis|COI-5P	CNPEB756-14	ENEA	0	0	0	0.0017	0.0018	0.0017	0.0017	0.019	0.0017	0.0017	0.0017	0.0193	0.0018	0.0017	0.0018	0.0017	0.0018	0.0018	0.0017	0.0017	0.0017	0.0017	0.0193	0.0017	0.0017	0.0017	0.0017	0.0017	0.0018	0.0017	0.0202	0.0017	0.0018	0.0017	0.0017	0.0017	0.0017	0.0017	0.0017	0.0195	0.0018	0.0017	0.0018	0.0018	0.0018	0.0017	0.0017
[1047] #CNPEB757-14|KR235509|BIOUG10263-G12|Ctenosciara_hyalipennis|COI-5P	CNPEB757-14	ENEA	0.0017	0.0017	0.0017	0	0	0	0	0.0172	0	0	0	0.0175	0	0	0	0	0	0	0	0	0	0	0.0175	0	0	0	0	0	0	0	0.0184	0	0	0	0	0	0	0	0	0.0177	0	0	0	0	0	0	0
[1048] #CNPEB758-14|KR251620|BIOUG10263-H01|Ctenosciara_hyalipennis|COI-5P	CNPEB758-14	ENEA	0.0017	0.0017	0.0017	0	0	0	0	0.0172	0	0	0	0.0175	0	0	0	0	0	0	0	0	0	0	0.0175	0	0	0	0	0	0	0	0.0184	0	0	0	0	0	0	0	0	0.0177	0	0	0	0	0	0	0
[1049] #CNPEB775-14|KR242475|BIOUG10264-A07|Ctenosciara_hyalipennis|COI-5P	CNPEB775-14	ENEA	0.0018	0.0018	0.0018	0	0	0	0	0.0183	0	0	0	0.0183	0	0	0	0	0	0	0	0	0	0	0.0186	0	0	0	0	0	0	0	0.0192	0	0	0	0	0	0	0	0	0.0183	0	0	0	0	0	0	0
[1050] #CNPEB777-14|KR239997|BIOUG10264-A09|Ctenosciara_hyalipennis|COI-5P	CNPEB777-14	ENEA	0.0017	0.0017	0.0017	0	0	0	0	0.0177	0	0	0	0.018	0	0	0	0	0	0	0	0	0	0	0.0177	0	0	0	0	0	0	0	0.0184	0	0	0	0	0	0	0	0	0.0181	0	0	0	0	0	0	0
[1051] #CNPEB782-14|KR253960|BIOUG10264-B02|Ctenosciara_hyalipennis|COI-5P	CNPEB782-14	ENEA	0	0	0	0.0017	0.0018	0.0017	0.0017	0.019	0.0017	0.0017	0.0017	0.0193	0.0018	0.0017	0.0018	0.0017	0.0018	0.0018	0.0017	0.0017	0.0017	0.0017	0.0193	0.0017	0.0017	0.0017	0.0017	0.0017	0.0018	0.0017	0.0202	0.0017	0.0018	0.0017	0.0017	0.0017	0.0017	0.0017	0.0017	0.0195	0.0018	0.0017	0.0018	0.0018	0.0018	0.0017	0.0017
[1052] #CNPEB794-14|KR237380|BIOUG10264-C02|Ctenosciara_hyalipennis|COI-5P	CNPEB794-14	ENEA	0.0017	0.0017	0.0017	0	0	0	0	0.0172	0	0	0	0.0175	0	0	0	0	0	0	0	0	0	0	0.0175	0	0	0	0	0	0	0	0.0184	0	0	0	0	0	0	0	0	0.0177	0	0	0	0	0	0	0
[1053] #CNPEB803-14|KR235494|BIOUG10264-C11|Ctenosciara_hyalipennis|COI-5P	CNPEB803-14	ENEA	0.0017	0.0017	0.0017	0	0	0	0	0.0172	0	0	0	0.0175	0	0	0	0	0	0	0	0	0	0	0.0175	0	0	0	0	0	0	0	0.0184	0	0	0	0	0	0	0	0	0.0177	0	0	0	0	0	0	0
[1054] #CNPEB814-14|KR242146|BIOUG10264-D10|Ctenosciara_hyalipennis|COI-5P	CNPEB814-14	ENEA	0	0	0	0.0017	0.0018	0.0017	0.0017	0.0191	0.0017	0.0017	0.0017	0.0193	0.0018	0.0017	0.0018	0.0017	0.0018	0.0018	0.0017	0.0017	0.0017	0.0017	0.0193	0.0017	0.0017	0.0017	0.0017	0.0017	0.0018	0.0017	0.0202	0.0017	0.0018	0.0017	0.0017	0.0017	0.0017	0.0017	0.0017	0.0195	0.0018	0.0017	0.0018	0.0018	0.0018	0.0017	0.0017
[1055] #CNPEB818-14|KR258126|BIOUG10264-E02|Ctenosciara_hyalipennis|COI-5P	CNPEB818-14	ENEA	0.0017	0.0017	0.0017	0	0	0	0	0.0172	0	0	0	0.0175	0	0	0	0	0	0	0	0	0	0	0.0175	0	0	0	0	0	0	0	0.0184	0	0	0	0	0	0	0	0	0.0177	0	0	0	0	0	0	0
[1056] #CNPEB834-14|KR238712|BIOUG10264-F06|Ctenosciara_hyalipennis|COI-5P	CNPEB834-14	ENEA	0.0017	0.0017	0.0017	0	0	0	0	0.0174	0	0	0	0.0177	0	0	0	0	0	0	0	0	0	0	0.0175	0	0	0	0	0	0	0	0.0184	0	0	0	0	0	0	0	0	0.0178	0	0	0	0	0	0	0
[1057] #CNPEB838-14|KR244131|BIOUG10264-F10|Ctenosciara_hyalipennis|COI-5P	CNPEB838-14	ENEA	0.0017	0.0017	0.0017	0	0	0	0	0.0172	0	0	0	0.0175	0	0	0	0	0	0	0	0	0	0	0.0175	0	0	0	0	0	0	0	0.0184	0	0	0	0	0	0	0	0	0.0177	0	0	0	0	0	0	0
[1058] #CNPEB861-14|KR252720|BIOUG10264-H09|Ctenosciara_hyalipennis|COI-5P	CNPEB861-14	ENEA	0.0017	0.0017	0.0017	0	0	0	0	0.0174	0	0	0	0.0178	0	0	0	0	0	0	0	0	0	0	0.0175	0	0	0	0	0	0	0	0.0184	0	0	0	0	0	0	0	0	0.018	0	0	0	0	0	0	0
[1059] #CNPEB874-14|KR239417|BIOUG10265-A11|Ctenosciara_hyalipennis|COI-5P	CNPEB874-14	ENEA	0.0017	0.0017	0.0017	0	0	0	0	0.0172	0	0	0	0.0175	0	0	0	0	0	0	0	0	0	0	0.0175	0	0	0	0	0	0	0	0.0184	0	0	0	0	0	0	0	0	0.0177	0	0	0	0	0	0	0
[1060] #CNPEB884-14|KR256037|BIOUG10265-B09|Ctenosciara_hyalipennis|COI-5P	CNPEB884-14	ENEA	0.0018	0.0018	0.0018	0	0	0	0	0.018	0	0	0	0.0184	0	0	0	0	0	0	0	0	0	0	0.018	0	0	0	0	0	0	0	0.0184	0	0	0	0	0	0	0	0	0.0185	0	0	0	0	0	0	0
[1061] #CNPEB886-14|KR256518|BIOUG10265-B11|Ctenosciara_hyalipennis|COI-5P	CNPEB886-14	ENEA	0	0	0	0.0017	0.0018	0.0017	0.0017	0.019	0.0017	0.0017	0.0017	0.0193	0.0018	0.0017	0.0018	0.0017	0.0018	0.0018	0.0017	0.0017	0.0017	0.0017	0.0193	0.0017	0.0017	0.0017	0.0017	0.0017	0.0018	0.0017	0.0202	0.0017	0.0018	0.0017	0.0017	0.0017	0.0017	0.0017	0.0017	0.0195	0.0018	0.0017	0.0018	0.0018	0.0018	0.0017	0.0017
[1062] #CNPEB899-14|KR253416|BIOUG10265-C12|Ctenosciara_hyalipennis|COI-5P	CNPEB899-14	ENEA	0	0	0	0.0017	0.0018	0.0017	0.0017	0.0194	0.0017	0.0017	0.0017	0.0196	0.0018	0.0017	0.0018	0.0017	0.0018	0.0018	0.0017	0.0018	0.0017	0.0017	0.0194	0.0017	0.0017	0.0017	0.0017	0.0017	0.0018	0.0017	0.0202	0.0017	0.0018	0.0017	0.0017	0.0018	0.0018	0.0017	0.0017	0.0198	0.0018	0.0017	0.0018	0.0018	0.0018	0.0017	0.0017
[1063] #CNPEB904-14|KR255795|BIOUG10265-D05|Ctenosciara_hyalipennis|COI-5P	CNPEB904-14	ENEA	0	0	0	0.0017	0.0018	0.0017	0.0017	0.019	0.0017	0.0017	0.0017	0.0193	0.0018	0.0017	0.0018	0.0017	0.0018	0.0018	0.0017	0.0017	0.0017	0.0017	0.0193	0.0017	0.0017	0.0017	0.0017	0.0017	0.0018	0.0017	0.0202	0.0017	0.0018	0.0017	0.0017	0.0017	0.0017	0.0017	0.0017	0.0195	0.0018	0.0017	0.0018	0.0018	0.0018	0.0017	0.0017
[1064] #CNPEB905-14|KR238592|BIOUG10265-D06|Ctenosciara_hyalipennis|COI-5P	CNPEB905-14	ENEA	0.0017	0.0017	0.0017	0	0	0	0	0.0172	0	0	0	0.0175	0	0	0	0	0	0	0	0	0	0	0.0175	0	0	0	0	0	0	0	0.0184	0	0	0	0	0	0	0	0	0.0177	0	0	0	0	0	0	0
[1065] #CNPEB906-14|KR236972|BIOUG10265-D07|Ctenosciara_hyalipennis|COI-5P	CNPEB906-14	ENEA	0	0	0	0.0017	0.0018	0.0017	0.0017	0.0194	0.0017	0.0017	0.0017	0.0198	0.0018	0.0017	0.0018	0.0017	0.0018	0.0018	0.0017	0.0018	0.0017	0.0017	0.0194	0.0017	0.0017	0.0017	0.0017	0.0017	0.0018	0.0017	0.0202	0.0017	0.0018	0.0017	0.0017	0.0018	0.0018	0.0017	0.0017	0.02	0.0018	0.0017	0.0018	0.0018	0.0018	0.0017	0.0017
[1066] #CNPEB912-14|KR254343|BIOUG10265-E01|Ctenosciara_hyalipennis|COI-5P	CNPEB912-14	ENEA	0.0017	0.0017	0.0017	0	0	0	0	0.0174	0	0	0	0.0178	0	0	0	0	0	0	0	0	0	0	0.0175	0	0	0	0	0	0	0	0.0184	0	0	0	0	0	0	0	0	0.018	0	0	0	0	0	0	0
[1067] #CNPEB932-14|KR249016|BIOUG10265-F09|Ctenosciara_hyalipennis|COI-5P	CNPEB932-14	ENEA	0	0	0	0	0	0	0	0.0171	0	0	0	0.0176	0	0	0	0	0	0	0	0	0	0	0.0172	0	0	0	0	0	0	0	0.0176	0	0	0	0	0	0	0	0	0.0178	0	0	0	0	0	0	0
[1068] #CNPEB937-14|KR236387|BIOUG10265-G02|Ctenosciara_hyalipennis|COI-5P	CNPEB937-14	ENEA	0.0017	0.0017	0.0017	0	0	0	0	0.0172	0	0	0	0.0175	0	0	0	0	0	0	0	0	0	0	0.0175	0	0	0	0	0	0	0	0.0184	0	0	0	0	0	0	0	0	0.0177	0	0	0	0	0	0	0
[1069] #CNPEB939-14|KR244855|BIOUG10265-G04|Ctenosciara_hyalipennis|COI-5P	CNPEB939-14	ENEA	0	0	0	0.0017	0.0018	0.0017	0.0017	0.0189	0.0017	0.0017	0.0017	0.0193	0.0018	0.0017	0.0018	0.0017	0.0018	0.0018	0.0017	0.0017	0.0017	0.0017	0.0193	0.0017	0.0017	0.0017	0.0017	0.0017	0.0018	0.0017	0.0202	0.0017	0.0018	0.0017	0.0017	0.0017	0.0017	0.0017	0.0017	0.0195	0.0018	0.0017	0.0018	0.0018	0.0018	0.0017	0.0017
[1070] #CNPEB942-14|KR243975|BIOUG10265-G07|Ctenosciara_hyalipennis|COI-5P	CNPEB942-14	ENEA	0.0017	0.0017	0.0017	0	0	0	0	0.0172	0	0	0	0.0175	0	0	0	0	0	0	0	0	0	0	0.0175	0	0	0	0	0	0	0	0.0184	0	0	0	0	0	0	0	0	0.0177	0	0	0	0	0	0	0
[1071] #CNPEB943-14|KR234339|BIOUG10265-G08|Ctenosciara_hyalipennis|COI-5P	CNPEB943-14	ENEA	0	0	0	0.0017	0.0018	0.0017	0.0017	0.019	0.0017	0.0017	0.0017	0.0193	0.0018	0.0017	0.0018	0.0017	0.0018	0.0018	0.0017	0.0017	0.0017	0.0017	0.0193	0.0017	0.0017	0.0017	0.0017	0.0017	0.0018	0.0017	0.0202	0.0017	0.0018	0.0017	0.0017	0.0017	0.0017	0.0017	0.0017	0.0195	0.0018	0.0017	0.0018	0.0018	0.0018	0.0017	0.0017
[1072] #CNPEB954-14|KR254998|BIOUG10265-H07|Ctenosciara_hyalipennis|COI-5P	CNPEB954-14	ENEA	0.0017	0.0017	0.0017	0	0	0	0	0.0172	0	0	0	0.0175	0	0	0	0	0	0	0	0	0	0	0.0175	0	0	0	0	0	0	0	0.0184	0	0	0	0	0	0	0	0	0.0177	0	0	0	0	0	0	0
[1073] #CNPEB958-14|KR242735|BIOUG10265-H11|Ctenosciara_hyalipennis|COI-5P	CNPEB958-14	ENEA	0.0017	0.0017	0.0017	0	0	0	0	0.0174	0	0	0	0.0177	0	0	0	0	0	0	0	0	0	0	0.0175	0	0	0	0	0	0	0	0.0184	0	0	0	0	0	0	0	0	0.0179	0	0	0	0	0	0	0
[1074] #CNPEB959-14|KR256407|BIOUG10266-A01|Ctenosciara_hyalipennis|COI-5P	CNPEB959-14	ENEA	0.0017	0.0017	0.0017	0	0	0	0	0.0172	0	0	0	0.0175	0	0	0	0	0	0	0	0	0	0	0.0175	0	0	0	0	0	0	0	0.0184	0	0	0	0	0	0	0	0	0.0177	0	0	0	0	0	0	0
[1075] #CNPEB960-14|KR251661|BIOUG10266-A02|Ctenosciara_hyalipennis|COI-5P	CNPEB960-14	ENEA	0	0	0	0.0017	0.0018	0.0017	0.0017	0.0189	0.0017	0.0017	0.0017	0.0193	0.0018	0.0017	0.0018	0.0017	0.0018	0.0018	0.0017	0.0017	0.0017	0.0017	0.0193	0.0017	0.0017	0.0017	0.0017	0.0017	0.0018	0.0017	0.0202	0.0017	0.0018	0.0017	0.0017	0.0017	0.0017	0.0017	0.0017	0.0195	0.0018	0.0017	0.0018	0.0018	0.0018	0.0017	0.0017
[1076] #CNPEB974-14|KR234464|BIOUG10266-B04|Ctenosciara_hyalipennis|COI-5P	CNPEB974-14	ENEA	0.0017	0.0017	0.0017	0	0	0	0	0.0172	0	0	0	0.0175	0	0	0	0	0	0	0	0	0	0	0.0175	0	0	0	0	0	0	0	0.0184	0	0	0	0	0	0	0	0	0.0177	0	0	0	0	0	0	0
[1077] #CNPEB977-14|KR244932|BIOUG10266-B07|Ctenosciara_hyalipennis|COI-5P	CNPEB977-14	ENEA	0.0017	0.0017	0.0017	0	0	0	0	0.0172	0	0	0	0.0175	0	0	0	0	0	0	0	0	0	0	0.0175	0	0	0	0	0	0	0	0.0184	0	0	0	0	0	0	0	0	0.0177	0	0	0	0	0	0	0
[1078] #CNPEB981-14|KR256923|BIOUG10266-B11|Ctenosciara_hyalipennis|COI-5P	CNPEB981-14	ENEA	0	0	0	0.0018	0.0018	0.0017	0.0018	0.0193	0.0017	0.0017	0.0018	0.0193	0.0018	0.0018	0.0018	0.0017	0.0018	0.0018	0.0017	0.0017	0.0018	0.0018	0.0196	0.0017	0.0017	0.0017	0.0017	0.0018	0.0018	0.0017	0.0202	0.0017	0.0018	0.0017	0.0017	0.0017	0.0017	0.0018	0.0018	0.0195	0.0018	0.0018	0.0018	0.0018	0.0018	0.0017	0.0018
[1079] #CNPEB996-14|KR255882|BIOUG10266-D02|Ctenosciara_hyalipennis|COI-5P	CNPEB996-14	ENEA	0.0017	0.0017	0.0017	0	0	0	0	0.0172	0	0	0	0.0175	0	0	0	0	0	0	0	0	0	0	0.0175	0	0	0	0	0	0	0	0.0184	0	0	0	0	0	0	0	0	0.0177	0	0	0	0	0	0	0
[1080] #CNPEC1055-14|KR242911|BIOUG10319-H09|Ctenosciara_hyalipennis|COI-5P	CNPEC1055-14	ENEA	0.0017	0.0017	0.0017	0	0	0	0	0.0174	0	0	0	0.0178	0	0	0	0	0	0	0	0	0	0	0.0175	0	0	0	0	0	0	0	0.0184	0	0	0	0	0	0	0	0	0.018	0	0	0	0	0	0	0
[1081] #CNPEC1172-14|KR243948|BIOUG10321-B08|Ctenosciara_hyalipennis|COI-5P	CNPEC1172-14	ENEA	0.0017	0.0017	0.0017	0	0	0	0	0.0176	0	0	0	0.0178	0	0	0	0	0	0	0	0	0	0	0.0176	0	0	0	0	0	0	0	0.0184	0	0	0	0	0	0	0	0	0.018	0	0	0	0	0	0	0
[1082] #CNPEC1548-14|KR241712|BIOUG10325-B04|Ctenosciara_hyalipennis|COI-5P	CNPEC1548-14	ENEA	0.0017	0.0017	0.0017	0	0	0	0	0.0172	0	0	0	0.0175	0	0	0	0	0	0	0	0	0	0	0.0175	0	0	0	0	0	0	0	0.0184	0	0	0	0	0	0	0	0	0.0177	0	0	0	0	0	0	0
[1083] #CNPEC1562-14|KR237612|BIOUG10325-C06|Ctenosciara_hyalipennis|COI-5P	CNPEC1562-14	ENEA	0.0017	0.0017	0.0017	0	0	0	0	0.0172	0	0	0	0.0175	0	0	0	0	0	0	0	0	0	0	0.0175	0	0	0	0	0	0	0	0.0184	0	0	0	0	0	0	0	0	0.0177	0	0	0	0	0	0	0
[1084] #CNPEC1621-14|KR239950|BIOUG10325-H05|Ctenosciara_hyalipennis|COI-5P	CNPEC1621-14	ENEA	0	0	0	0.0017	0.0018	0.0017	0.0017	0.0189	0.0017	0.0017	0.0017	0.0193	0.0018	0.0017	0.0018	0.0017	0.0018	0.0018	0.0017	0.0017	0.0017	0.0017	0.0193	0.0017	0.0017	0.0017	0.0017	0.0017	0.0018	0.0017	0.0202	0.0017	0.0018	0.0017	0.0017	0.0017	0.0017	0.0017	0.0017	0.0195	0.0018	0.0017	0.0018	0.0018	0.0018	0.0017	0.0017
[1085] #CNPEC198-14|KR242530|BIOUG10308-H07|Ctenosciara_hyalipennis|COI-5P	CNPEC198-14	ENEA	0.0018	0.0018	0.0018	0	0	0	0	0.0186	0	0	0	0.0186	0	0	0	0	0	0	0	0	0	0	0.0186	0	0	0	0	0	0	0	0.0192	0	0	0	0	0	0	0	0	0.0186	0	0	0	0	0	0	0
[1086] #CNPEC398-14|KR236736|BIOUG10313-A06|Ctenosciara_hyalipennis|COI-5P	CNPEC398-14	ENEA	0.0017	0.0017	0.0017	0	0	0	0	0.0173	0	0	0	0.0175	0	0	0	0	0	0	0	0	0	0	0.0175	0	0	0	0	0	0	0	0.0184	0	0	0	0	0	0	0	0	0.0177	0	0	0	0	0	0	0
[1087] #CNPEC470-14|KR247026|BIOUG10313-G06|Ctenosciara_hyalipennis|COI-5P	CNPEC470-14	ENEA	0.0017	0.0017	0.0017	0	0	0	0	0.0172	0	0	0	0.0175	0	0	0	0	0	0	0	0	0	0	0.0175	0	0	0	0	0	0	0	0.0184	0	0	0	0	0	0	0	0	0.0177	0	0	0	0	0	0	0
[1088] #CNPEC535-14|KR244759|BIOUG10314-D12|Ctenosciara_hyalipennis|COI-5P	CNPEC535-14	ENEA	0.0017	0.0017	0.0017	0	0	0	0	0.0172	0	0	0	0.0175	0	0	0	0	0	0	0	0	0	0	0.0175	0	0	0	0	0	0	0	0.0184	0	0	0	0	0	0	0	0	0.0177	0	0	0	0	0	0	0
[1089] #CNPED099-14|KR253662|BIOUG10330-F05|Ctenosciara_hyalipennis|COI-5P	CNPED099-14	ENEA	0.0017	0.0017	0.0017	0	0	0	0	0.0172	0	0	0	0.0175	0	0	0	0	0	0	0	0	0	0	0.0175	0	0	0	0	0	0	0	0.0184	0	0	0	0	0	0	0	0	0.0177	0	0	0	0	0	0	0
[1090] #CNPED240-14|KR238825|BIOUG10366-G12|Ctenosciara_hyalipennis|COI-5P	CNPED240-14	ENEA	0.0017	0.0017	0.0017	0	0	0	0	0.0175	0	0	0	0.0175	0	0	0	0	0	0	0	0	0	0	0.0178	0	0	0	0	0	0	0	0.0184	0	0	0	0	0	0	0	0	0.0177	0	0	0	0	0	0	0
[1091] #CNPED270-14|KR244017|BIOUG10367-B07|Ctenosciara_hyalipennis|COI-5P	CNPED270-14	ENEA	0.0019	0.0019	0.0019	0	0	0	0	0.017	0	0	0	0.017	0	0	0	0	0	0	0	0	0	0	0.0172	0	0	0	0	0	0	0	0.0178	0	0	0	0	0	0	0	0	0.017	0	0	0	0	0	0	0
[1092] #CNPED378-14|KR234514|BIOUG10368-C08|Ctenosciara_hyalipennis|COI-5P	CNPED378-14	ENEA	0.0017	0.0017	0.0017	0	0	0	0	0.0172	0	0	0	0.0175	0	0	0	0	0	0	0	0	0	0	0.0175	0	0	0	0	0	0	0	0.0184	0	0	0	0	0	0	0	0	0.0177	0	0	0	0	0	0	0
[1093] #CNPED399-14|KR241651|BIOUG10368-E05|Ctenosciara_hyalipennis|COI-5P	CNPED399-14	ENEA	0.0017	0.0017	0.0017	0	0	0	0	0.0175	0	0	0	0.0175	0	0	0	0	0	0	0	0	0	0	0.0178	0	0	0	0	0	0	0	0.0184	0	0	0	0	0	0	0	0	0.0177	0	0	0	0	0	0	0
[1094] #CNPED406-14|KR255492|BIOUG10368-E12|Ctenosciara_hyalipennis|COI-5P	CNPED406-14	ENEA	0	0	0	0.0018	0.0018	0.0017	0.0018	0.0193	0.0017	0.0017	0.0018	0.0193	0.0018	0.0018	0.0018	0.0017	0.0018	0.0018	0.0017	0.0017	0.0018	0.0018	0.0196	0.0017	0.0017	0.0017	0.0017	0.0018	0.0018	0.0017	0.0202	0.0017	0.0018	0.0017	0.0017	0.0017	0.0017	0.0018	0.0018	0.0195	0.0018	0.0018	0.0018	0.0018	0.0018	0.0017	0.0018
[1095] #CNPED425-14|KR239186|BIOUG10368-G07|Ctenosciara_hyalipennis|COI-5P	CNPED425-14	ENEA	0.0017	0.0017	0.0017	0	0	0	0	0.0172	0	0	0	0.0175	0	0	0	0	0	0	0	0	0	0	0.0175	0	0	0	0	0	0	0	0.0184	0	0	0	0	0	0	0	0	0.0177	0	0	0	0	0	0	0
[1096] #CNPED432-14|KR239227|BIOUG10368-H02|Ctenosciara_hyalipennis|COI-5P	CNPED432-14	ENEA	0.0018	0.0018	0.0018	0	0	0	0	0.0183	0	0	0	0.0183	0	0	0	0	0	0	0	0	0	0	0.0186	0	0	0	0	0	0	0	0.0192	0	0	0	0	0	0	0	0	0.0183	0	0	0	0	0	0	0
[1097] #CNPED779-14|KR250710|BIOUG10372-E05|Ctenosciara_hyalipennis|COI-5P	CNPED779-14	ENEA	0	0	0	0.0017	0.0018	0.0017	0.0017	0.019	0.0017	0.0017	0.0017	0.0193	0.0018	0.0017	0.0018	0.0017	0.0018	0.0018	0.0017	0.0017	0.0017	0.0017	0.0193	0.0017	0.0017	0.0017	0.0017	0.0017	0.0018	0.0017	0.0202	0.0017	0.0018	0.0017	0.0017	0.0017	0.0017	0.0017	0.0017	0.0195	0.0018	0.0017	0.0018	0.0018	0.0018	0.0017	0.0017
[1098] #CNPED804-14|KR257151|BIOUG10372-G06|Ctenosciara_hyalipennis|COI-5P	CNPED804-14	ENEA	0.0018	0.0018	0.0018	0	0	0	0	0.0178	0	0	0	0.0178	0	0	0	0	0	0	0	0	0	0	0.0178	0	0	0	0	0	0	0	0.0184	0	0	0	0	0	0	0	0	0.018	0	0	0	0	0	0	0
[1099] #CNPED846-14|KR239495|BIOUG10373-C01|Ctenosciara_hyalipennis|COI-5P	CNPED846-14	ENEA	0.0017	0.0017	0.0017	0	0	0	0	0.0175	0	0	0	0.0175	0	0	0	0	0	0	0	0	0	0	0.0178	0	0	0	0	0	0	0	0.0184	0	0	0	0	0	0	0	0	0.0177	0	0	0	0	0	0	0
[1100] #CNPEE976-14|KR235105|BIOUG10438-G01|Ctenosciara_hyalipennis|COI-5P	CNPEE976-14	ENEA	0.0017	0.0017	0.0017	0	0	0	0	0.0172	0	0	0	0.0175	0	0	0	0	0	0	0	0	0	0	0.0175	0	0	0	0	0	0	0	0.0184	0	0	0	0	0	0	0	0	0.0177	0	0	0	0	0	0	0
[1101] #CNPEF148-14|KR245524|BIOUG10467-C06|Ctenosciara_hyalipennis|COI-5P	CNPEF148-14	ENEA	0.0017	0.0017	0.0017	0	0	0	0	0.0172	0	0	0	0.0175	0	0	0	0	0	0	0	0	0	0	0.0175	0	0	0	0	0	0	0	0.0184	0	0	0	0	0	0	0	0	0.0177	0	0	0	0	0	0	0
[1102] #CNPEF175-14|KR236698|BIOUG10467-E09|Ctenosciara_hyalipennis|COI-5P	CNPEF175-14	ENEA	0.0017	0.0017	0.0017	0	0	0	0	0.0175	0	0	0	0.0179	0	0	0	0	0	0	0	0	0	0	0.0175	0	0	0	0	0	0	0	0.0184	0	0	0	0	0	0	0	0	0.018	0	0	0	0	0	0	0
[1103] #CNPEF376-14|KR240948|BIOUG10469-F08|Ctenosciara_hyalipennis|COI-5P	CNPEF376-14	ENEA	0.0017	0.0017	0.0017	0	0	0	0	0.0172	0	0	0	0.0175	0	0	0	0	0	0	0	0	0	0	0.0175	0	0	0	0	0	0	0	0.0184	0	0	0	0	0	0	0	0	0.0177	0	0	0	0	0	0	0
[1104] #CNPEF407-14|KR237436|BIOUG10470-A04|Ctenosciara_hyalipennis|COI-5P	CNPEF407-14	ENEA	0.0018	0.0018	0.0018	0	0	0	0	0.0184	0	0	0	0.0184	0	0	0	0	0	0	0	0	0	0	0.0184	0	0	0	0	0	0	0	0.0184	0	0	0	0	0	0	0	0	0.0185	0	0	0	0	0	0	0
[1105] #CNPEF481-14|KR237069|BIOUG10470-G06|Ctenosciara_hyalipennis|COI-5P	CNPEF481-14	ENEA	0.0017	0.0017	0.0017	0	0	0	0	0.0172	0	0	0	0.0175	0	0	0	0	0	0	0	0	0	0	0.0175	0	0	0	0	0	0	0	0.0184	0	0	0	0	0	0	0	0	0.0177	0	0	0	0	0	0	0
[1106] #CNPEF499-14|KR237682|BIOUG10487-A01|Ctenosciara_hyalipennis|COI-5P	CNPEF499-14	ENEA	0.0017	0.0017	0.0017	0	0	0	0	0.0172	0	0	0	0.0175	0	0	0	0	0	0	0	0	0	0	0.0175	0	0	0	0	0	0	0	0.0184	0	0	0	0	0	0	0	0	0.0177	0	0	0	0	0	0	0
[1107] #CNPEF521-14|KR246173|BIOUG10487-B11|Ctenosciara_hyalipennis|COI-5P	CNPEF521-14	ENEA	0.0018	0.0018	0.0018	0	0	0	0	0.0165	0	0	0	0.0165	0	0	0	0	0	0	0	0	0	0	0.0168	0	0	0	0	0	0	0	0.0173	0	0	0	0	0	0	0	0	0.0165	0	0	0	0	0	0	0
[1108] #CNPEF544-14|KR236987|BIOUG10487-D10|Ctenosciara_hyalipennis|COI-5P	CNPEF544-14	ENEA	0.0017	0.0017	0.0017	0	0	0	0	0.0172	0	0	0	0.0175	0	0	0	0	0	0	0	0	0	0	0.0175	0	0	0	0	0	0	0	0.0184	0	0	0	0	0	0	0	0	0.0177	0	0	0	0	0	0	0
[1109] #CNPEF619-14|KR249784|BIOUG10488-C02|Ctenosciara_hyalipennis|COI-5P	CNPEF619-14	ENEA	0.0018	0.0018	0.0018	0	0	0	0	0.0178	0	0	0	0.0178	0	0	0	0	0	0	0	0	0	0	0.0178	0	0	0	0	0	0	0	0.0184	0	0	0	0	0	0	0	0	0.018	0	0	0	0	0	0	0
[1110] #CNPEF724-14|KR237129|BIOUG10489-C12|Ctenosciara_hyalipennis|COI-5P	CNPEF724-14	ENEA	0.0017	0.0017	0.0017	0	0	0	0	0.0174	0	0	0	0.0178	0	0	0	0	0	0	0	0	0	0	0.0175	0	0	0	0	0	0	0	0.0184	0	0	0	0	0	0	0	0	0.018	0	0	0	0	0	0	0
[1111] #CNPEG035-14|KR255910|BIOUG10493-A07|Ctenosciara_hyalipennis|COI-5P	CNPEG035-14	ENEA	0.0018	0.0018	0.0018	0	0	0	0	0.018	0	0	0	0.018	0	0	0	0	0	0	0	0	0	0	0.0183	0	0	0	0	0	0	0	0.0188	0	0	0	0	0	0	0	0	0.018	0	0	0	0	0	0	0
[1112] #CNPEG089-14|KR242966|BIOUG10493-F01|Ctenosciara_hyalipennis|COI-5P	CNPEG089-14	ENEA	0	0	0	0.0017	0.0018	0.0017	0.0017	0.0189	0.0017	0.0017	0.0017	0.0193	0.0018	0.0017	0.0018	0.0017	0.0018	0.0018	0.0017	0.0017	0.0017	0.0017	0.0193	0.0017	0.0017	0.0017	0.0017	0.0017	0.0018	0.0017	0.0202	0.0017	0.0018	0.0017	0.0017	0.0017	0.0017	0.0017	0.0017	0.0195	0.0018	0.0017	0.0018	0.0018	0.0018	0.0017	0.0017
[1113] #CNPEG267-14|KR241922|BIOUG10495-E01|Ctenosciara_hyalipennis|COI-5P	CNPEG267-14	ENEA	0.0017	0.0017	0.0017	0	0	0	0	0.0172	0	0	0	0.0176	0	0	0	0	0	0	0	0	0	0	0.0175	0	0	0	0	0	0	0	0.0184	0	0	0	0	0	0	0	0	0.0177	0	0	0	0	0	0	0
[1114] #CNPEG289-14|KR257014|BIOUG10495-F11|Ctenosciara_hyalipennis|COI-5P	CNPEG289-14	ENEA	0.0018	0.0018	0.0018	0	0	0	0	0.018	0	0	0	0.018	0	0	0	0	0	0	0	0	0	0	0.018	0	0	0	0	0	0	0	0.0185	0	0	0	0	0	0	0	0	0.0181	0	0	0	0	0	0	0
[1115] #CNPEG391-14|KR253103|BIOUG10496-G06|Ctenosciara_hyalipennis|COI-5P	CNPEG391-14	ENEA	0	0	0	0.0017	0.0018	0.0017	0.0017	0.0194	0.0017	0.0017	0.0017	0.0197	0.0018	0.0017	0.0018	0.0017	0.0018	0.0018	0.0017	0.0018	0.0017	0.0017	0.0194	0.0017	0.0017	0.0017	0.0017	0.0017	0.0018	0.0017	0.0202	0.0017	0.0018	0.0017	0.0017	0.0018	0.0018	0.0017	0.0017	0.0199	0.0018	0.0018	0.0018	0.0018	0.0018	0.0017	0.0017
[1116] #CNPEG394-14|KR257211|BIOUG10496-G09|Ctenosciara_hyalipennis|COI-5P	CNPEG394-14	ENEA	0.0017	0.0017	0.0017	0	0	0	0	0.0173	0	0	0	0.0176	0	0	0	0	0	0	0	0	0	0	0.0175	0	0	0	0	0	0	0	0.0184	0	0	0	0	0	0	0	0	0.0177	0	0	0	0	0	0	0
[1117] #CNPEG395-14|KR244843|BIOUG10496-G10|Ctenosciara_hyalipennis|COI-5P	CNPEG395-14	ENEA	0	0	0	0.0017	0.0018	0.0017	0.0017	0.0189	0.0017	0.0017	0.0017	0.0193	0.0018	0.0017	0.0018	0.0017	0.0018	0.0018	0.0017	0.0017	0.0017	0.0017	0.0193	0.0017	0.0017	0.0017	0.0017	0.0017	0.0018	0.0017	0.0202	0.0017	0.0018	0.0017	0.0017	0.0017	0.0017	0.0017	0.0017	0.0195	0.0018	0.0017	0.0018	0.0018	0.0018	0.0017	0.0017
[1118] #CNPEH063-14|KR250355|BIOUG10564-C05|Ctenosciara_hyalipennis|COI-5P	CNPEH063-14	ENEA	0	0	0	0.0019	0.0019	0.0019	0.0019	0.0208	0.0019	0.0019	0.0019	0.0208	0.0019	0.0019	0.0019	0.0019	0.0019	0.0019	0.0019	0.0019	0.0019	0.0019	0.0208	0.0019	0.0019	0.0019	0.0019	0.0019	0.0019	0.0019	0.0212	0.0019	0.0019	0.0019	0.0019	0.0019	0.0019	0.0019	0.0019	0.0208	0.0019	0.0019	0.0019	0.0019	0.0019	0.0019	0.0019
[1119] #CNPEI051-14|KR245140|BIOUG10566-D09|Ctenosciara_hyalipennis|COI-5P	CNPEI051-14	ENEA	0.0017	0.0017	0.0017	0	0	0	0	0.0175	0	0	0	0.0176	0	0	0	0	0	0	0	0	0	0	0.0177	0	0	0	0	0	0	0	0.0184	0	0	0	0	0	0	0	0	0.0177	0	0	0	0	0	0	0
[1120] #CNPEI082-14|KR247749|BIOUG10566-G04|Ctenosciara_hyalipennis|COI-5P	CNPEI082-14	ENEA	0.0017	0.0017	0.0017	0	0	0	0	0.0173	0	0	0	0.0176	0	0	0	0	0	0	0	0	0	0	0.0175	0	0	0	0	0	0	0	0.0184	0	0	0	0	0	0	0	0	0.0177	0	0	0	0	0	0	0
[1121] #CNPEK171-14|KR239742|BIOUG10597-F07|Ctenosciara_hyalipennis|COI-5P	CNPEK171-14	ENEA	0.0018	0.0018	0.0018	0	0	0	0	0.0168	0	0	0	0.0168	0	0	0	0	0	0	0	0	0	0	0.017	0	0	0	0	0	0	0	0.0176	0	0	0	0	0	0	0	0	0.0168	0	0	0	0	0	0	0
[1122] #CNPEL031-14|KR256139|BIOUG10617-A07|Ctenosciara_hyalipennis|COI-5P	CNPEL031-14	ENEA	0.0019	0.0019	0.0019	0	0	0	0	0.017	0	0	0	0.017	0	0	0	0	0	0	0	0	0	0	0.017	0	0	0	0	0	0	0	0.0175	0	0	0	0	0	0	0	0	0.017	0	0	0	0	0	0	0
[1123] #CNPEL044-14|KR247619|BIOUG10617-B08|Ctenosciara_hyalipennis|COI-5P	CNPEL044-14	ENEA	0.0017	0.0017	0.0017	0	0	0	0	0.0172	0	0	0	0.0175	0	0	0	0	0	0	0	0	0	0	0.0175	0	0	0	0	0	0	0	0.0184	0	0	0	0	0	0	0	0	0.0177	0	0	0	0	0	0	0
[1124] #CNPEL045-14|KR240362|BIOUG10617-B09|Ctenosciara_hyalipennis|COI-5P	CNPEL045-14	ENEA	0.0017	0.0017	0.0017	0	0	0	0	0.0172	0	0	0	0.0175	0	0	0	0	0	0	0	0	0	0	0.0175	0	0	0	0	0	0	0	0.0184	0	0	0	0	0	0	0	0	0.0177	0	0	0	0	0	0	0
[1125] #CNPEL046-14|KR247253|BIOUG10617-B10|Ctenosciara_hyalipennis|COI-5P	CNPEL046-14	ENEA	0.0019	0.0019	0.0019	0	0	0	0	0.0188	0	0	0	0.0188	0	0	0	0	0	0	0	0	0	0	0.0188	0	0	0	0	0	0	0	0.0188	0	0	0	0	0	0	0	0	0.0189	0	0	0	0	0	0	0
[1126] #CNPEL056-14|KR251107|BIOUG10617-C08|Ctenosciara_hyalipennis|COI-5P	CNPEL056-14	ENEA	0.0017	0.0017	0.0017	0	0	0	0	0.0176	0	0	0	0.0179	0	0	0	0	0	0	0	0	0	0	0.0176	0	0	0	0	0	0	0	0.0184	0	0	0	0	0	0	0	0	0.018	0	0	0	0	0	0	0
[1127] #CNPEL059-14|KR247384|BIOUG10617-C11|Ctenosciara_hyalipennis|COI-5P	CNPEL059-14	ENEA	0.0017	0.0017	0.0017	0	0	0	0	0.0176	0	0	0	0.0179	0	0	0	0	0	0	0	0	0	0	0.0176	0	0	0	0	0	0	0	0.0184	0	0	0	0	0	0	0	0	0.018	0	0	0	0	0	0	0
[1128] #CNPEL063-14|KR243506|BIOUG10617-D03|Ctenosciara_hyalipennis|COI-5P	CNPEL063-14	ENEA	0	0	0	0.0017	0.0018	0.0017	0.0017	0.019	0.0017	0.0017	0.0017	0.0194	0.0018	0.0017	0.0018	0.0017	0.0018	0.0018	0.0017	0.0017	0.0017	0.0017	0.0193	0.0017	0.0017	0.0017	0.0017	0.0017	0.0018	0.0017	0.0202	0.0017	0.0018	0.0017	0.0017	0.0017	0.0017	0.0017	0.0017	0.0195	0.0018	0.0017	0.0018	0.0018	0.0018	0.0017	0.0017
[1129] #CNPEL081-14|KR246468|BIOUG10617-E09|Ctenosciara_hyalipennis|COI-5P	CNPEL081-14	ENEA	0.0017	0.0017	0.0017	0	0	0	0	0.0172	0	0	0	0.0175	0	0	0	0	0	0	0	0	0	0	0.0175	0	0	0	0	0	0	0	0.0184	0	0	0	0	0	0	0	0	0.0177	0	0	0	0	0	0	0
[1130] #CNPEL086-14|KR235795|BIOUG10617-F02|Ctenosciara_hyalipennis|COI-5P	CNPEL086-14	ENEA	0.0017	0.0017	0.0017	0	0	0	0	0.0172	0	0	0	0.0176	0	0	0	0	0	0	0	0	0	0	0.0175	0	0	0	0	0	0	0	0.0184	0	0	0	0	0	0	0	0	0.0177	0	0	0	0	0	0	0
[1131] #CNPEL089-14|KR238063|BIOUG10617-F05|Ctenosciara_hyalipennis|COI-5P	CNPEL089-14	ENEA	0	0	0	0.0018	0.0019	0.0018	0.0018	0.0202	0.0018	0.0018	0.0018	0.0202	0.0019	0.0018	0.0018	0.0018	0.0018	0.0019	0.0018	0.0018	0.0018	0.0018	0.0202	0.0018	0.0018	0.0018	0.0018	0.0018	0.0019	0.0018	0.0208	0.0018	0.0019	0.0018	0.0018	0.0018	0.0018	0.0018	0.0018	0.0202	0.0019	0.0018	0.0018	0.0019	0.0019	0.0018	0.0018
[1132] #CNPEL094-14|KR253640|BIOUG10617-F10|Ctenosciara_hyalipennis|COI-5P	CNPEL094-14	ENEA	0	0	0	0.0017	0.0018	0.0017	0.0017	0.0192	0.0017	0.0017	0.0017	0.0197	0.0018	0.0017	0.0018	0.0017	0.0018	0.0018	0.0017	0.0018	0.0017	0.0017	0.0193	0.0017	0.0017	0.0017	0.0017	0.0017	0.0018	0.0017	0.0202	0.0017	0.0018	0.0017	0.0017	0.0018	0.0018	0.0017	0.0017	0.0199	0.0018	0.0017	0.0018	0.0018	0.0018	0.0017	0.0017
[1133] #CNPEL099-14|KR253509|BIOUG10617-G03|Ctenosciara_hyalipennis|COI-5P	CNPEL099-14	ENEA	0.0019	0.0019	0.0019	0	0	0	0	0.0177	0	0	0	0.0177	0	0	0	0	0	0	0	0	0	0	0.0177	0	0	0	0	0	0	0	0.0177	0	0	0	0	0	0	0	0	0.0177	0	0	0	0	0	0	0
[1134] #CNPEL1006-14|KR249209|BIOUG10627-C08|Ctenosciara_hyalipennis|COI-5P	CNPEL1006-14	ENEA	0.0017	0.0017	0.0017	0	0	0	0	0.0175	0	0	0	0.0179	0	0	0	0	0	0	0	0	0	0	0.0175	0	0	0	0	0	0	0	0.0184	0	0	0	0	0	0	0	0	0.018	0	0	0	0	0	0	0
[1135] #CNPEL1011-14|KR252492|BIOUG10627-D01|Ctenosciara_hyalipennis|COI-5P	CNPEL1011-14	ENEA	0.0017	0.0017	0.0017	0	0	0	0	0.0173	0	0	0	0.0176	0	0	0	0	0	0	0	0	0	0	0.0175	0	0	0	0	0	0	0	0.0184	0	0	0	0	0	0	0	0	0.0177	0	0	0	0	0	0	0
[1136] #CNPEL1016-14|KR255605|BIOUG10627-D06|Ctenosciara_hyalipennis|COI-5P	CNPEL1016-14	ENEA	0.0017	0.0017	0.0017	0	0	0	0	0.0172	0	0	0	0.0176	0	0	0	0	0	0	0	0	0	0	0.0175	0	0	0	0	0	0	0	0.0184	0	0	0	0	0	0	0	0	0.0177	0	0	0	0	0	0	0
[1137] #CNPEL1027-14|KR255648|BIOUG10627-E05|Ctenosciara_hyalipennis|COI-5P	CNPEL1027-14	ENEA	0	0	0	0.0017	0.0018	0.0017	0.0017	0.019	0.0017	0.0017	0.0017	0.0194	0.0018	0.0017	0.0018	0.0017	0.0018	0.0018	0.0017	0.0017	0.0017	0.0017	0.0193	0.0017	0.0017	0.0017	0.0017	0.0017	0.0018	0.0017	0.0202	0.0017	0.0018	0.0017	0.0017	0.0017	0.0017	0.0017	0.0017	0.0195	0.0018	0.0017	0.0018	0.0018	0.0018	0.0017	0.0017
[1138] #CNPEL103-14|KR252145|BIOUG10617-G07|Ctenosciara_hyalipennis|COI-5P	CNPEL103-14	ENEA	0	0	0	0.0019	0.0019	0.0018	0.0019	0.0186	0.0018	0.0018	0.0019	0.0186	0.0019	0.0019	0.0019	0.0018	0.0019	0.0019	0.0018	0.0018	0.0019	0.0019	0.0189	0.0018	0.0018	0.0018	0.0018	0.0019	0.0019	0.0018	0.0195	0.0018	0.0019	0.0018	0.0018	0.0018	0.0018	0.0019	0.0019	0.0186	0.0019	0.0019	0.0019	0.0019	0.0019	0.0018	0.0019
[1139] #CNPEL1032-14|KR252402|BIOUG10627-E10|Ctenosciara_hyalipennis|COI-5P	CNPEL1032-14	ENEA	0	0	0	0.0017	0.0018	0.0017	0.0017	0.019	0.0017	0.0017	0.0017	0.0194	0.0018	0.0017	0.0018	0.0017	0.0018	0.0018	0.0017	0.0017	0.0017	0.0017	0.0193	0.0017	0.0017	0.0017	0.0017	0.0017	0.0018	0.0017	0.0202	0.0017	0.0018	0.0017	0.0017	0.0017	0.0017	0.0017	0.0017	0.0195	0.0018	0.0017	0.0018	0.0018	0.0018	0.0017	0.0017
[1140] #CNPEL1037-14|KR255896|BIOUG10627-F03|Ctenosciara_hyalipennis|COI-5P	CNPEL1037-14	ENEA	0.0017	0.0017	0.0017	0	0	0	0	0.0173	0	0	0	0.0176	0	0	0	0	0	0	0	0	0	0	0.0175	0	0	0	0	0	0	0	0.0184	0	0	0	0	0	0	0	0	0.0177	0	0	0	0	0	0	0
[1141] #CNPEL1038-14|KR251580|BIOUG10627-F04|Ctenosciara_hyalipennis|COI-5P	CNPEL1038-14	ENEA	0.0017	0.0017	0.0017	0	0	0	0	0.0172	0	0	0	0.0176	0	0	0	0	0	0	0	0	0	0	0.0175	0	0	0	0	0	0	0	0.0184	0	0	0	0	0	0	0	0	0.0177	0	0	0	0	0	0	0
[1142] #CNPEL1039-14|KR258027|BIOUG10627-F05|Ctenosciara_hyalipennis|COI-5P	CNPEL1039-14	ENEA	0.0017	0.0017	0.0017	0	0	0	0	0.0173	0	0	0	0.0176	0	0	0	0	0	0	0	0	0	0	0.0175	0	0	0	0	0	0	0	0.0184	0	0	0	0	0	0	0	0	0.0177	0	0	0	0	0	0	0
[1143] #CNPEL1041-14|KR246971|BIOUG10627-F07|Ctenosciara_hyalipennis|COI-5P	CNPEL1041-14	ENEA	0.0017	0.0017	0.0017	0	0	0	0	0.0173	0	0	0	0.0176	0	0	0	0	0	0	0	0	0	0	0.0175	0	0	0	0	0	0	0	0.0184	0	0	0	0	0	0	0	0	0.0177	0	0	0	0	0	0	0
[1144] #CNPEL105-14|KR239145|BIOUG10617-G09|Ctenosciara_hyalipennis|COI-5P	CNPEL105-14	ENEA	0.0018	0.0018	0.0018	0	0	0	0	0.0184	0	0	0	0.0184	0	0	0	0	0	0	0	0	0	0	0.0184	0	0	0	0	0	0	0	0.0189	0	0	0	0	0	0	0	0	0.0184	0	0	0	0	0	0	0
[1145] #CNPEL1068-14|KR235539|BIOUG10627-H10|Ctenosciara_hyalipennis|COI-5P	CNPEL1068-14	ENEA	0.0017	0.0017	0.0017	0	0	0	0	0.0172	0	0	0	0.0176	0	0	0	0	0	0	0	0	0	0	0.0175	0	0	0	0	0	0	0	0.0184	0	0	0	0	0	0	0	0	0.0177	0	0	0	0	0	0	0
[1146] #CNPEL1073-14|KR237659|BIOUG10628-A04|Ctenosciara_hyalipennis|COI-5P	CNPEL1073-14	ENEA	0.0018	0.0018	0.0018	0	0	0	0	0.0184	0	0	0	0.0184	0	0	0	0	0	0	0	0	0	0	0.0187	0	0	0	0	0	0	0	0.0193	0	0	0	0	0	0	0	0	0.0184	0	0	0	0	0	0	0
[1147] #CNPEL1076-14|KR258024|BIOUG10628-A07|Ctenosciara_hyalipennis|COI-5P	CNPEL1076-14	ENEA	0	0	0	0.0017	0.0018	0.0017	0.0017	0.019	0.0017	0.0017	0.0017	0.0194	0.0018	0.0017	0.0018	0.0017	0.0018	0.0018	0.0017	0.0017	0.0017	0.0017	0.0193	0.0017	0.0017	0.0017	0.0017	0.0017	0.0018	0.0017	0.0202	0.0017	0.0018	0.0017	0.0017	0.0017	0.0017	0.0017	0.0017	0.0195	0.0018	0.0017	0.0018	0.0018	0.0018	0.0017	0.0017
[1148] #CNPEL1077-14|KR254623|BIOUG10628-A08|Ctenosciara_hyalipennis|COI-5P	CNPEL1077-14	ENEA	0	0	0	0.0017	0.0018	0.0017	0.0017	0.0189	0.0017	0.0017	0.0017	0.0194	0.0018	0.0017	0.0018	0.0017	0.0018	0.0018	0.0017	0.0017	0.0017	0.0017	0.0193	0.0017	0.0017	0.0017	0.0017	0.0017	0.0018	0.0017	0.0202	0.0017	0.0018	0.0017	0.0017	0.0017	0.0017	0.0017	0.0017	0.0195	0.0018	0.0017	0.0018	0.0018	0.0018	0.0017	0.0017
[1149] #CNPEL1078-14|KR237265|BIOUG10628-A09|Ctenosciara_hyalipennis|COI-5P	CNPEL1078-14	ENEA	0.0017	0.0017	0.0017	0	0	0	0	0.0174	0	0	0	0.0176	0	0	0	0	0	0	0	0	0	0	0.0176	0	0	0	0	0	0	0	0.0184	0	0	0	0	0	0	0	0	0.0177	0	0	0	0	0	0	0
[1150] #CNPEL1079-14|KR246068|BIOUG10628-A10|Ctenosciara_hyalipennis|COI-5P	CNPEL1079-14	ENEA	0.0017	0.0017	0.0017	0	0	0	0	0.0176	0	0	0	0.0176	0	0	0	0	0	0	0	0	0	0	0.0179	0	0	0	0	0	0	0	0.0184	0	0	0	0	0	0	0	0	0.0177	0	0	0	0	0	0	0
[1151] #CNPEL1082-14|KR250027|BIOUG10628-B01|Ctenosciara_hyalipennis|COI-5P	CNPEL1082-14	ENEA	0.0017	0.0017	0.0017	0	0	0	0	0.0176	0	0	0	0.0176	0	0	0	0	0	0	0	0	0	0	0.0179	0	0	0	0	0	0	0	0.0184	0	0	0	0	0	0	0	0	0.0177	0	0	0	0	0	0	0
[1152] #CNPEL1091-14|KR257983|BIOUG10628-B10|Ctenosciara_hyalipennis|COI-5P	CNPEL1091-14	ENEA	0	0	0	0.0017	0.0018	0.0017	0.0017	0.019	0.0017	0.0017	0.0017	0.0194	0.0018	0.0017	0.0018	0.0017	0.0018	0.0018	0.0017	0.0017	0.0017	0.0017	0.0193	0.0017	0.0017	0.0017	0.0017	0.0017	0.0018	0.0017	0.0202	0.0017	0.0018	0.0017	0.0017	0.0017	0.0017	0.0017	0.0017	0.0195	0.0018	0.0017	0.0018	0.0018	0.0018	0.0017	0.0017
[1153] #CNPEL1096-14|KR257578|BIOUG10628-C03|Ctenosciara_hyalipennis|COI-5P	CNPEL1096-14	ENEA	0.0017	0.0017	0.0017	0	0	0	0	0.0172	0	0	0	0.0176	0	0	0	0	0	0	0	0	0	0	0.0175	0	0	0	0	0	0	0	0.0184	0	0	0	0	0	0	0	0	0.0177	0	0	0	0	0	0	0
[1154] #CNPEL1101-14|KR258130|BIOUG10628-C08|Ctenosciara_hyalipennis|COI-5P	CNPEL1101-14	ENEA	0.0017	0.0017	0.0017	0	0	0	0	0.0175	0	0	0	0.0179	0	0	0	0	0	0	0	0	0	0	0.0175	0	0	0	0	0	0	0	0.0184	0	0	0	0	0	0	0	0	0.018	0	0	0	0	0	0	0
[1155] #CNPEL1119-14|KR247438|BIOUG10628-E02|Ctenosciara_hyalipennis|COI-5P	CNPEL1119-14	ENEA	0	0	0	0.0017	0.0018	0.0017	0.0017	0.0189	0.0017	0.0017	0.0017	0.0194	0.0018	0.0017	0.0018	0.0017	0.0018	0.0018	0.0017	0.0017	0.0017	0.0017	0.0193	0.0017	0.0017	0.0017	0.0017	0.0017	0.0018	0.0017	0.0202	0.0017	0.0018	0.0017	0.0017	0.0017	0.0017	0.0017	0.0017	0.0195	0.0018	0.0017	0.0018	0.0018	0.0018	0.0017	0.0017
[1156] #CNPEL1127-14|KR240663|BIOUG10628-E10|Ctenosciara_hyalipennis|COI-5P	CNPEL1127-14	ENEA	0.0017	0.0017	0.0017	0	0	0	0	0.0175	0	0	0	0.0179	0	0	0	0	0	0	0	0	0	0	0.0175	0	0	0	0	0	0	0	0.0184	0	0	0	0	0	0	0	0	0.018	0	0	0	0	0	0	0
[1157] #CNPEL1129-14|KR242780|BIOUG10628-E12|Ctenosciara_hyalipennis|COI-5P	CNPEL1129-14	ENEA	0.0017	0.0017	0.0017	0	0	0	0	0.0172	0	0	0	0.0176	0	0	0	0	0	0	0	0	0	0	0.0175	0	0	0	0	0	0	0	0.0184	0	0	0	0	0	0	0	0	0.0177	0	0	0	0	0	0	0
[1158] #CNPEL1144-14|KR234117|BIOUG10628-G03|Ctenosciara_hyalipennis|COI-5P	CNPEL1144-14	ENEA	0	0	0	0.0017	0.0018	0.0017	0.0017	0.0194	0.0017	0.0017	0.0017	0.0197	0.0018	0.0017	0.0018	0.0017	0.0018	0.0018	0.0017	0.0018	0.0017	0.0017	0.0194	0.0017	0.0017	0.0017	0.0017	0.0017	0.0018	0.0017	0.0202	0.0017	0.0018	0.0017	0.0017	0.0018	0.0018	0.0017	0.0017	0.0199	0.0018	0.0018	0.0018	0.0018	0.0018	0.0017	0.0017
[1159] #CNPEL1160-14|KR255745|BIOUG10628-H07|Ctenosciara_hyalipennis|COI-5P	CNPEL1160-14	ENEA	0.0017	0.0017	0.0017	0	0	0	0	0.0173	0	0	0	0.0176	0	0	0	0	0	0	0	0	0	0	0.0175	0	0	0	0	0	0	0	0.0184	0	0	0	0	0	0	0	0	0.0177	0	0	0	0	0	0	0
[1160] #CNPEL1169-14|KR245251|BIOUG10629-A05|Ctenosciara_hyalipennis|COI-5P	CNPEL1169-14	ENEA	0	0	0	0.0017	0.0018	0.0017	0.0017	0.0191	0.0017	0.0017	0.0017	0.0194	0.0018	0.0017	0.0018	0.0017	0.0018	0.0018	0.0017	0.0017	0.0017	0.0017	0.0194	0.0017	0.0017	0.0017	0.0017	0.0017	0.0018	0.0017	0.0202	0.0017	0.0018	0.0017	0.0017	0.0017	0.0017	0.0017	0.0017	0.0195	0.0018	0.0018	0.0018	0.0018	0.0018	0.0017	0.0017
[1161] #CNPEL1177-14|KR234793|BIOUG10629-B01|Ctenosciara_hyalipennis|COI-5P	CNPEL1177-14	ENEA	0.0017	0.0017	0.0017	0	0	0	0	0.0172	0	0	0	0.0176	0	0	0	0	0	0	0	0	0	0	0.0175	0	0	0	0	0	0	0	0.0184	0	0	0	0	0	0	0	0	0.0177	0	0	0	0	0	0	0
[1162] #CNPEL1192-14|KR252887|BIOUG10629-C04|Ctenosciara_hyalipennis|COI-5P	CNPEL1192-14	ENEA	0.0017	0.0017	0.0017	0	0	0	0	0.0173	0	0	0	0.0176	0	0	0	0	0	0	0	0	0	0	0.0175	0	0	0	0	0	0	0	0.0184	0	0	0	0	0	0	0	0	0.0177	0	0	0	0	0	0	0
[1163] #CNPEL1193-14|KR238255|BIOUG10629-C05|Ctenosciara_hyalipennis|COI-5P	CNPEL1193-14	ENEA	0.0017	0.0017	0.0017	0	0	0	0	0.0173	0	0	0	0.0176	0	0	0	0	0	0	0	0	0	0	0.0175	0	0	0	0	0	0	0	0.0184	0	0	0	0	0	0	0	0	0.0177	0	0	0	0	0	0	0
[1164] #CNPEL1198-14|KR235266|BIOUG10629-C10|Ctenosciara_hyalipennis|COI-5P	CNPEL1198-14	ENEA	0.0018	0.0018	0.0018	0	0	0	0	0.0179	0	0	0	0.0179	0	0	0	0	0	0	0	0	0	0	0.0179	0	0	0	0	0	0	0	0.0184	0	0	0	0	0	0	0	0	0.018	0	0	0	0	0	0	0
[1165] #CNPEL1209-14|KR240540|BIOUG10629-D09|Ctenosciara_hyalipennis|COI-5P	CNPEL1209-14	ENEA	0.0017	0.0017	0.0017	0	0	0	0	0.0173	0	0	0	0.0176	0	0	0	0	0	0	0	0	0	0	0.0175	0	0	0	0	0	0	0	0.0184	0	0	0	0	0	0	0	0	0.0177	0	0	0	0	0	0	0
[1166] #CNPEL1215-14|KR242612|BIOUG10629-E03|Ctenosciara_hyalipennis|COI-5P	CNPEL1215-14	ENEA	0.0017	0.0017	0.0017	0	0	0	0	0.0173	0	0	0	0.0176	0	0	0	0	0	0	0	0	0	0	0.0175	0	0	0	0	0	0	0	0.0184	0	0	0	0	0	0	0	0	0.0177	0	0	0	0	0	0	0
[1167] #CNPEL1216-14|KR251109|BIOUG10629-E04|Ctenosciara_hyalipennis|COI-5P	CNPEL1216-14	ENEA	0.0017	0.0017	0.0017	0	0	0	0	0.0172	0	0	0	0.0176	0	0	0	0	0	0	0	0	0	0	0.0175	0	0	0	0	0	0	0	0.0184	0	0	0	0	0	0	0	0	0.0177	0	0	0	0	0	0	0
[1168] #CNPEL1221-14|KR250743|BIOUG10629-E09|Ctenosciara_hyalipennis|COI-5P	CNPEL1221-14	ENEA	0.0017	0.0017	0.0017	0	0	0	0	0.0172	0	0	0	0.0176	0	0	0	0	0	0	0	0	0	0	0.0175	0	0	0	0	0	0	0	0.0184	0	0	0	0	0	0	0	0	0.0177	0	0	0	0	0	0	0
[1169] #CNPEL1225-14|KR237828|BIOUG10629-F01|Ctenosciara_hyalipennis|COI-5P	CNPEL1225-14	ENEA	0.0017	0.0017	0.0017	0	0	0	0	0.0174	0	0	0	0.0176	0	0	0	0	0	0	0	0	0	0	0.0176	0	0	0	0	0	0	0	0.0184	0	0	0	0	0	0	0	0	0.0177	0	0	0	0	0	0	0
[1170] #CNPEL1232-14|KR243959|BIOUG10629-F08|Ctenosciara_hyalipennis|COI-5P	CNPEL1232-14	ENEA	0.0017	0.0017	0.0017	0	0	0	0	0.0176	0	0	0	0.018	0	0	0	0	0	0	0	0	0	0	0.0176	0	0	0	0	0	0	0	0.0184	0	0	0	0	0	0	0	0	0.0181	0	0	0	0	0	0	0
[1171] #CNPEL1235-14|KR243624|BIOUG10629-F11|Ctenosciara_hyalipennis|COI-5P	CNPEL1235-14	ENEA	0	0	0	0.0017	0.0018	0.0017	0.0017	0.019	0.0017	0.0017	0.0017	0.0194	0.0018	0.0017	0.0018	0.0017	0.0018	0.0018	0.0017	0.0017	0.0017	0.0017	0.0193	0.0017	0.0017	0.0017	0.0017	0.0017	0.0018	0.0017	0.0202	0.0017	0.0018	0.0017	0.0017	0.0017	0.0017	0.0017	0.0017	0.0195	0.0018	0.0017	0.0018	0.0018	0.0018	0.0017	0.0017
[1172] #CNPEL1238-14|KR235207|BIOUG10629-G02|Ctenosciara_hyalipennis|COI-5P	CNPEL1238-14	ENEA	0.0017	0.0017	0.0017	0	0	0	0	0.0174	0	0	0	0.0176	0	0	0	0	0	0	0	0	0	0	0.0176	0	0	0	0	0	0	0	0.0184	0	0	0	0	0	0	0	0	0.0177	0	0	0	0	0	0	0
[1173] #CNPEL124-14|KR258525|BIOUG10618-A05|Ctenosciara_hyalipennis|COI-5P	CNPEL124-14	ENEA	0.0018	0.0018	0.0018	0	0	0	0	0.0183	0	0	0	0.0186	0	0	0	0	0	0	0	0	0	0	0.0183	0	0	0	0	0	0	0	0.0186	0	0	0	0	0	0	0	0	0.0187	0	0	0	0	0	0	0
[1174] #CNPEL1247-14|KR250886|BIOUG10629-G11|Ctenosciara_hyalipennis|COI-5P	CNPEL1247-14	ENEA	0.0017	0.0017	0.0017	0	0	0	0	0.0172	0	0	0	0.0176	0	0	0	0	0	0	0	0	0	0	0.0175	0	0	0	0	0	0	0	0.0184	0	0	0	0	0	0	0	0	0.0177	0	0	0	0	0	0	0
[1175] #CNPEL1250-14|KR249018|BIOUG10629-H02|Ctenosciara_hyalipennis|COI-5P	CNPEL1250-14	ENEA	0.0017	0.0017	0.0017	0	0	0	0	0.0174	0	0	0	0.0176	0	0	0	0	0	0	0	0	0	0	0.0176	0	0	0	0	0	0	0	0.0184	0	0	0	0	0	0	0	0	0.0177	0	0	0	0	0	0	0
[1176] #CNPEL1251-14|KR256379|BIOUG10629-H03|Ctenosciara_hyalipennis|COI-5P	CNPEL1251-14	ENEA	0.0017	0.0017	0.0017	0	0	0	0	0.0173	0	0	0	0.0176	0	0	0	0	0	0	0	0	0	0	0.0175	0	0	0	0	0	0	0	0.0184	0	0	0	0	0	0	0	0	0.0177	0	0	0	0	0	0	0
[1177] #CNPEL1252-14|KR246424|BIOUG10629-H04|Ctenosciara_hyalipennis|COI-5P	CNPEL1252-14	ENEA	0	0	0	0.0017	0.0018	0.0017	0.0017	0.0195	0.0017	0.0017	0.0017	0.0198	0.0018	0.0017	0.0018	0.0017	0.0018	0.0018	0.0017	0.0018	0.0017	0.0017	0.0195	0.0017	0.0017	0.0017	0.0017	0.0017	0.0018	0.0017	0.0202	0.0017	0.0018	0.0017	0.0017	0.0018	0.0018	0.0017	0.0017	0.02	0.0018	0.0018	0.0018	0.0018	0.0018	0.0017	0.0017
[1178] #CNPEL1253-14|KR234904|BIOUG10629-H05|Ctenosciara_hyalipennis|COI-5P	CNPEL1253-14	ENEA	0.0017	0.0017	0.0017	0	0	0	0	0.0172	0	0	0	0.0176	0	0	0	0	0	0	0	0	0	0	0.0175	0	0	0	0	0	0	0	0.0184	0	0	0	0	0	0	0	0	0.0177	0	0	0	0	0	0	0
[1179] #CNPEL1257-14|KR248772|BIOUG10629-H09|Ctenosciara_hyalipennis|COI-5P	CNPEL1257-14	ENEA	0.0017	0.0017	0.0017	0	0	0	0	0.0176	0	0	0	0.0176	0	0	0	0	0	0	0	0	0	0	0.0179	0	0	0	0	0	0	0	0.0184	0	0	0	0	0	0	0	0	0.0177	0	0	0	0	0	0	0
[1180] #CNPEL1261-14|KR257862|BIOUG10630-A02|Ctenosciara_hyalipennis|COI-5P	CNPEL1261-14	ENEA	0.0017	0.0017	0.0017	0	0	0	0	0.0173	0	0	0	0.0176	0	0	0	0	0	0	0	0	0	0	0.0175	0	0	0	0	0	0	0	0.0184	0	0	0	0	0	0	0	0	0.0177	0	0	0	0	0	0	0
[1181] #CNPEL1265-14|KR239496|BIOUG10630-A06|Ctenosciara_hyalipennis|COI-5P	CNPEL1265-14	ENEA	0.0017	0.0017	0.0017	0	0	0	0	0.0173	0	0	0	0.0176	0	0	0	0	0	0	0	0	0	0	0.0175	0	0	0	0	0	0	0	0.0184	0	0	0	0	0	0	0	0	0.0177	0	0	0	0	0	0	0
[1182] #CNPEL1280-14|KR234824|BIOUG10630-B09|Ctenosciara_hyalipennis|COI-5P	CNPEL1280-14	ENEA	0.0018	0.0018	0.0018	0	0	0	0	0.018	0	0	0	0.018	0	0	0	0	0	0	0	0	0	0	0.0183	0	0	0	0	0	0	0	0.0188	0	0	0	0	0	0	0	0	0.018	0	0	0	0	0	0	0
[1183] #CNPEL1282-14|KR256252|BIOUG10630-B11|Ctenosciara_hyalipennis|COI-5P	CNPEL1282-14	ENEA	0.0017	0.0017	0.0017	0	0	0	0	0.0176	0	0	0	0.0179	0	0	0	0	0	0	0	0	0	0	0.0176	0	0	0	0	0	0	0	0.0184	0	0	0	0	0	0	0	0	0.018	0	0	0	0	0	0	0
[1184] #CNPEL1288-14|KR244239|BIOUG10630-C05|Ctenosciara_hyalipennis|COI-5P	CNPEL1288-14	ENEA	0.0017	0.0017	0.0017	0	0	0	0	0.0173	0	0	0	0.0176	0	0	0	0	0	0	0	0	0	0	0.0175	0	0	0	0	0	0	0	0.0184	0	0	0	0	0	0	0	0	0.0177	0	0	0	0	0	0	0
[1185] #CNPEL1290-14|KR253272|BIOUG10630-C07|Ctenosciara_hyalipennis|COI-5P	CNPEL1290-14	ENEA	0.0017	0.0017	0.0017	0	0	0	0	0.0172	0	0	0	0.0176	0	0	0	0	0	0	0	0	0	0	0.0175	0	0	0	0	0	0	0	0.0184	0	0	0	0	0	0	0	0	0.0177	0	0	0	0	0	0	0
[1186] #CNPEL1294-14|KR256283|BIOUG10630-C11|Ctenosciara_hyalipennis|COI-5P	CNPEL1294-14	ENEA	0.0017	0.0017	0.0017	0	0	0	0	0.0172	0	0	0	0.0176	0	0	0	0	0	0	0	0	0	0	0.0175	0	0	0	0	0	0	0	0.0184	0	0	0	0	0	0	0	0	0.0177	0	0	0	0	0	0	0
[1187] #CNPEL1296-14|KR257564|BIOUG10630-D01|Ctenosciara_hyalipennis|COI-5P	CNPEL1296-14	ENEA	0.0017	0.0017	0.0017	0	0	0	0	0.0173	0	0	0	0.0176	0	0	0	0	0	0	0	0	0	0	0.0175	0	0	0	0	0	0	0	0.0184	0	0	0	0	0	0	0	0	0.0177	0	0	0	0	0	0	0
[1188] #CNPEL1297-14|KR256116|BIOUG10630-D02|Ctenosciara_hyalipennis|COI-5P	CNPEL1297-14	ENEA	0.0017	0.0017	0.0017	0	0	0	0	0.0174	0	0	0	0.0176	0	0	0	0	0	0	0	0	0	0	0.0176	0	0	0	0	0	0	0	0.0184	0	0	0	0	0	0	0	0	0.0177	0	0	0	0	0	0	0
[1189] #CNPEL1304-14|KR248114|BIOUG10630-D09|Ctenosciara_hyalipennis|COI-5P	CNPEL1304-14	ENEA	0	0	0	0.0018	0.0018	0.0017	0.0018	0.0194	0.0017	0.0017	0.0018	0.0194	0.0018	0.0018	0.0018	0.0017	0.0018	0.0018	0.0017	0.0017	0.0018	0.0018	0.0197	0.0017	0.0017	0.0017	0.0017	0.0018	0.0018	0.0017	0.0203	0.0017	0.0018	0.0017	0.0017	0.0017	0.0017	0.0018	0.0018	0.0195	0.0018	0.0018	0.0018	0.0018	0.0018	0.0017	0.0018
[1190] #CNPEL1306-14|KR242271|BIOUG10630-D11|Ctenosciara_hyalipennis|COI-5P	CNPEL1306-14	ENEA	0.0017	0.0017	0.0017	0	0	0	0	0.0173	0	0	0	0.0176	0	0	0	0	0	0	0	0	0	0	0.0175	0	0	0	0	0	0	0	0.0184	0	0	0	0	0	0	0	0	0.0177	0	0	0	0	0	0	0
[1191] #CNPEL1309-14|KR251473|BIOUG10630-E02|Ctenosciara_hyalipennis|COI-5P	CNPEL1309-14	ENEA	0	0	0	0.0017	0.0018	0.0017	0.0017	0.0192	0.0017	0.0017	0.0017	0.0197	0.0018	0.0017	0.0018	0.0017	0.0018	0.0018	0.0017	0.0018	0.0017	0.0017	0.0193	0.0017	0.0017	0.0017	0.0017	0.0017	0.0018	0.0017	0.0202	0.0017	0.0018	0.0017	0.0017	0.0018	0.0018	0.0017	0.0017	0.0199	0.0018	0.0017	0.0018	0.0018	0.0018	0.0017	0.0017
[1192] #CNPEL1316-14|KR250406|BIOUG10630-E09|Ctenosciara_hyalipennis|COI-5P	CNPEL1316-14	ENEA	0.0017	0.0017	0.0017	0	0	0	0	0.0173	0	0	0	0.0176	0	0	0	0	0	0	0	0	0	0	0.0175	0	0	0	0	0	0	0	0.0184	0	0	0	0	0	0	0	0	0.0177	0	0	0	0	0	0	0
[1193] #CNPEL1327-14|KR254054|BIOUG10630-F08|Ctenosciara_hyalipennis|COI-5P	CNPEL1327-14	ENEA	0.0018	0.0018	0.0018	0	0	0	0	0.0166	0	0	0	0.0166	0	0	0	0	0	0	0	0	0	0	0.0169	0	0	0	0	0	0	0	0.0174	0	0	0	0	0	0	0	0	0.0166	0	0	0	0	0	0	0
[1194] #CNPEL1332-14|KR255567|BIOUG10630-G01|Ctenosciara_hyalipennis|COI-5P	CNPEL1332-14	ENEA	0.0017	0.0017	0.0017	0	0	0	0	0.0174	0	0	0	0.0176	0	0	0	0	0	0	0	0	0	0	0.0176	0	0	0	0	0	0	0	0.0184	0	0	0	0	0	0	0	0	0.0177	0	0	0	0	0	0	0
[1195] #CNPEL1334-14|KR241537|BIOUG10630-G03|Ctenosciara_hyalipennis|COI-5P	CNPEL1334-14	ENEA	0.0017	0.0017	0.0017	0	0	0	0	0.0173	0	0	0	0.0176	0	0	0	0	0	0	0	0	0	0	0.0175	0	0	0	0	0	0	0	0.0184	0	0	0	0	0	0	0	0	0.0177	0	0	0	0	0	0	0
[1196] #CNPEL1342-14|KR254723|BIOUG10630-G11|Ctenosciara_hyalipennis|COI-5P	CNPEL1342-14	ENEA	0.0017	0.0017	0.0017	0	0	0	0	0.0174	0	0	0	0.0176	0	0	0	0	0	0	0	0	0	0	0.0176	0	0	0	0	0	0	0	0.0184	0	0	0	0	0	0	0	0	0.0177	0	0	0	0	0	0	0
[1197] #CNPEL1346-14|KR249261|BIOUG10630-H03|Ctenosciara_hyalipennis|COI-5P	CNPEL1346-14	ENEA	0.0017	0.0017	0.0017	0	0	0	0	0.0174	0	0	0	0.0176	0	0	0	0	0	0	0	0	0	0	0.0176	0	0	0	0	0	0	0	0.0184	0	0	0	0	0	0	0	0	0.0177	0	0	0	0	0	0	0
[1198] #CNPEL135-14|KR240845|BIOUG10618-B04|Ctenosciara_hyalipennis|COI-5P	CNPEL135-14	ENEA	0.0018	0.0018	0.0018	0	0	0	0	0.0179	0	0	0	0.0179	0	0	0	0	0	0	0	0	0	0	0.0179	0	0	0	0	0	0	0	0.0184	0	0	0	0	0	0	0	0	0.018	0	0	0	0	0	0	0
[1199] #CNPEL1350-14|KR235835|BIOUG10630-H07|Ctenosciara_hyalipennis|COI-5P	CNPEL1350-14	ENEA	0.0017	0.0017	0.0017	0	0	0	0	0.0176	0	0	0	0.0176	0	0	0	0	0	0	0	0	0	0	0.0179	0	0	0	0	0	0	0	0.0184	0	0	0	0	0	0	0	0	0.0177	0	0	0	0	0	0	0
[1200] #CNPEL1364-14|KR245376|BIOUG10651-A10|Ctenosciara_hyalipennis|COI-5P	CNPEL1364-14	ENEA	0.0018	0.0018	0.0018	0	0	0	0	0.0168	0	0	0	0.0168	0	0	0	0	0	0	0	0	0	0	0.017	0	0	0	0	0	0	0	0.0176	0	0	0	0	0	0	0	0	0.0168	0	0	0	0	0	0	0
[1201] #CNPEL1365-14|KR243061|BIOUG10651-A11|Ctenosciara_hyalipennis|COI-5P	CNPEL1365-14	ENEA	0.0017	0.0017	0.0017	0	0	0	0	0.0173	0	0	0	0.0176	0	0	0	0	0	0	0	0	0	0	0.0175	0	0	0	0	0	0	0	0.0184	0	0	0	0	0	0	0	0	0.0178	0	0	0	0	0	0	0
[1202] #CNPEL1366-14|KR250584|BIOUG10651-A12|Ctenosciara_hyalipennis|COI-5P	CNPEL1366-14	ENEA	0.0017	0.0017	0.0017	0	0	0	0	0.0172	0	0	0	0.0176	0	0	0	0	0	0	0	0	0	0	0.0175	0	0	0	0	0	0	0	0.0184	0	0	0	0	0	0	0	0	0.0177	0	0	0	0	0	0	0
[1203] #CNPEL1377-14|KR253991|BIOUG10651-B11|Ctenosciara_hyalipennis|COI-5P	CNPEL1377-14	ENEA	0.0017	0.0017	0.0017	0	0	0	0	0.0173	0	0	0	0.0176	0	0	0	0	0	0	0	0	0	0	0.0175	0	0	0	0	0	0	0	0.0184	0	0	0	0	0	0	0	0	0.0177	0	0	0	0	0	0	0
[1204] #CNPEL1381-14|KR245407|BIOUG10651-C03|Ctenosciara_hyalipennis|COI-5P	CNPEL1381-14	ENEA	0	0	0	0.0018	0.0019	0.0018	0.0018	0.0202	0.0018	0.0018	0.0018	0.0202	0.0019	0.0018	0.0018	0.0018	0.0018	0.0019	0.0018	0.0018	0.0018	0.0018	0.0202	0.0018	0.0018	0.0018	0.0018	0.0018	0.0019	0.0018	0.0208	0.0018	0.0019	0.0018	0.0018	0.0018	0.0018	0.0018	0.0018	0.0202	0.0019	0.0018	0.0018	0.0019	0.0019	0.0018	0.0018
[1205] #CNPEL139-14|KR252780|BIOUG10618-B08|Ctenosciara_hyalipennis|COI-5P	CNPEL139-14	ENEA	0.0019	0.0019	0.0019	0	0	0	0	0.0175	0	0	0	0.0175	0	0	0	0	0	0	0	0	0	0	0.0175	0	0	0	0	0	0	0	0.0175	0	0	0	0	0	0	0	0	0.0177	0	0	0	0	0	0	0
[1206] #CNPEL1391-14|KR244524|BIOUG10651-D01|Ctenosciara_hyalipennis|COI-5P	CNPEL1391-14	ENEA	0.0017	0.0017	0.0017	0	0	0	0	0.0176	0	0	0	0.0176	0	0	0	0	0	0	0	0	0	0	0.0179	0	0	0	0	0	0	0	0.0184	0	0	0	0	0	0	0	0	0.0177	0	0	0	0	0	0	0
[1207] #CNPEL1396-14|KR246250|BIOUG10651-D06|Ctenosciara_hyalipennis|COI-5P	CNPEL1396-14	ENEA	0.0017	0.0017	0.0017	0	0	0	0	0.0175	0	0	0	0.0179	0	0	0	0	0	0	0	0	0	0	0.0175	0	0	0	0	0	0	0	0.0184	0	0	0	0	0	0	0	0	0.018	0	0	0	0	0	0	0
[1208] #CNPEL1399-14|KR257221|BIOUG10651-D09|Ctenosciara_hyalipennis|COI-5P	CNPEL1399-14	ENEA	0.0017	0.0017	0.0017	0	0	0	0	0.0175	0	0	0	0.0179	0	0	0	0	0	0	0	0	0	0	0.0175	0	0	0	0	0	0	0	0.0184	0	0	0	0	0	0	0	0	0.018	0	0	0	0	0	0	0
[1209] #CNPEL1408-14|KR240498|BIOUG10651-E06|Ctenosciara_hyalipennis|COI-5P	CNPEL1408-14	ENEA	0	0	0	0.0017	0.0018	0.0017	0.0017	0.0191	0.0017	0.0017	0.0017	0.0194	0.0018	0.0017	0.0018	0.0017	0.0018	0.0018	0.0017	0.0017	0.0017	0.0017	0.0194	0.0017	0.0017	0.0017	0.0017	0.0017	0.0018	0.0017	0.0202	0.0017	0.0018	0.0017	0.0017	0.0017	0.0017	0.0017	0.0017	0.0195	0.0018	0.0018	0.0018	0.0018	0.0018	0.0017	0.0017
[1210] #CNPEL1409-14|KR236683|BIOUG10651-E07|Ctenosciara_hyalipennis|COI-5P	CNPEL1409-14	ENEA	0.0017	0.0017	0.0017	0	0	0	0	0.0175	0	0	0	0.0179	0	0	0	0	0	0	0	0	0	0	0.0175	0	0	0	0	0	0	0	0.0184	0	0	0	0	0	0	0	0	0.018	0	0	0	0	0	0	0
[1211] #CNPEL1423-14|KR247848|BIOUG10651-F09|Ctenosciara_hyalipennis|COI-5P	CNPEL1423-14	ENEA	0.0017	0.0017	0.0017	0	0	0	0	0.0174	0	0	0	0.0176	0	0	0	0	0	0	0	0	0	0	0.0176	0	0	0	0	0	0	0	0.0184	0	0	0	0	0	0	0	0	0.0177	0	0	0	0	0	0	0
[1212] #CNPEL1426-14|KR240981|BIOUG10651-F12|Ctenosciara_hyalipennis|COI-5P	CNPEL1426-14	ENEA	0	0	0	0.0017	0.0018	0.0017	0.0017	0.0193	0.0017	0.0017	0.0017	0.0197	0.0018	0.0017	0.0018	0.0017	0.0018	0.0018	0.0017	0.0018	0.0017	0.0017	0.0193	0.0017	0.0017	0.0017	0.0017	0.0017	0.0018	0.0017	0.0202	0.0017	0.0018	0.0017	0.0017	0.0018	0.0018	0.0017	0.0017	0.0199	0.0018	0.0017	0.0018	0.0018	0.0018	0.0017	0.0017
[1213] #CNPEL1433-14|KR258158|BIOUG10651-G07|Ctenosciara_hyalipennis|COI-5P	CNPEL1433-14	ENEA	0.0017	0.0017	0.0017	0	0	0	0	0.0175	0	0	0	0.0179	0	0	0	0	0	0	0	0	0	0	0.0175	0	0	0	0	0	0	0	0.0184	0	0	0	0	0	0	0	0	0.018	0	0	0	0	0	0	0
[1214] #CNPEL1440-14|KR255859|BIOUG10651-H02|Ctenosciara_hyalipennis|COI-5P	CNPEL1440-14	ENEA	0.0018	0.0018	0.0018	0	0	0	0	0.0179	0	0	0	0.0179	0	0	0	0	0	0	0	0	0	0	0.0179	0	0	0	0	0	0	0	0.0184	0	0	0	0	0	0	0	0	0.018	0	0	0	0	0	0	0
[1215] #CNPEL1449-14|KR253635|BIOUG10651-H11|Ctenosciara_hyalipennis|COI-5P	CNPEL1449-14	ENEA	0.0019	0.0019	0.0019	0	0	0	0	0.017	0	0	0	0.017	0	0	0	0	0	0	0	0	0	0	0.017	0	0	0	0	0	0	0	0.0175	0	0	0	0	0	0	0	0	0.017	0	0	0	0	0	0	0
[1216] #CNPEL145-14|KR253671|BIOUG10618-C02|Ctenosciara_hyalipennis|COI-5P	CNPEL145-14	ENEA	0.0017	0.0017	0.0017	0	0	0	0	0.0172	0	0	0	0.0175	0	0	0	0	0	0	0	0	0	0	0.0175	0	0	0	0	0	0	0	0.0184	0	0	0	0	0	0	0	0	0.0177	0	0	0	0	0	0	0
[1217] #CNPEL1470-14|KR249836|BIOUG10652-B09|Ctenosciara_hyalipennis|COI-5P	CNPEL1470-14	ENEA	0.0017	0.0017	0.0017	0	0	0	0	0.0172	0	0	0	0.0176	0	0	0	0	0	0	0	0	0	0	0.0175	0	0	0	0	0	0	0	0.0184	0	0	0	0	0	0	0	0	0.0178	0	0	0	0	0	0	0
[1218] #CNPEL1511-14|KR240120|BIOUG10652-F02|Ctenosciara_hyalipennis|COI-5P	CNPEL1511-14	ENEA	0	0	0	0.0017	0.0018	0.0017	0.0017	0.0189	0.0017	0.0017	0.0017	0.0194	0.0018	0.0017	0.0018	0.0017	0.0018	0.0018	0.0017	0.0017	0.0017	0.0017	0.0193	0.0017	0.0017	0.0017	0.0017	0.0017	0.0018	0.0017	0.0203	0.0017	0.0018	0.0017	0.0017	0.0017	0.0017	0.0017	0.0017	0.0195	0.0018	0.0017	0.0018	0.0018	0.0018	0.0017	0.0017
[1219] #CNPEL1533-14|KR244419|BIOUG10652-G12|Ctenosciara_hyalipennis|COI-5P	CNPEL1533-14	ENEA	0.0017	0.0017	0.0017	0	0	0	0	0.0172	0	0	0	0.0176	0	0	0	0	0	0	0	0	0	0	0.0175	0	0	0	0	0	0	0	0.0184	0	0	0	0	0	0	0	0	0.0177	0	0	0	0	0	0	0
[1220] #CNPEL1545-14|KR235694|BIOUG10653-A01|Ctenosciara_hyalipennis|COI-5P	CNPEL1545-14	ENEA	0.0017	0.0017	0.0017	0	0	0	0	0.0172	0	0	0	0.0176	0	0	0	0	0	0	0	0	0	0	0.0175	0	0	0	0	0	0	0	0.0184	0	0	0	0	0	0	0	0	0.0177	0	0	0	0	0	0	0
[1221] #CNPEL1549-14|KR244641|BIOUG10653-A05|Ctenosciara_hyalipennis|COI-5P	CNPEL1549-14	ENEA	0.0017	0.0017	0.0017	0	0	0	0	0.0173	0	0	0	0.0176	0	0	0	0	0	0	0	0	0	0	0.0175	0	0	0	0	0	0	0	0.0184	0	0	0	0	0	0	0	0	0.0177	0	0	0	0	0	0	0
[1222] #CNPEL1558-14|KR255734|BIOUG10653-B02|Ctenosciara_hyalipennis|COI-5P	CNPEL1558-14	ENEA	0.0017	0.0017	0.0017	0	0	0	0	0.0173	0	0	0	0.0176	0	0	0	0	0	0	0	0	0	0	0.0175	0	0	0	0	0	0	0	0.0184	0	0	0	0	0	0	0	0	0.0177	0	0	0	0	0	0	0
[1223] #CNPEL156-14|KR249076|BIOUG10618-D01|Ctenosciara_hyalipennis|COI-5P	CNPEL156-14	ENEA	0.0017	0.0017	0.0017	0	0	0	0	0.0172	0	0	0	0.0175	0	0	0	0	0	0	0	0	0	0	0.0175	0	0	0	0	0	0	0	0.0184	0	0	0	0	0	0	0	0	0.0177	0	0	0	0	0	0	0
[1224] #CNPEL1566-14|KR255993|BIOUG10653-B10|Ctenosciara_hyalipennis|COI-5P	CNPEL1566-14	ENEA	0.0017	0.0017	0.0017	0	0	0	0	0.0175	0	0	0	0.0179	0	0	0	0	0	0	0	0	0	0	0.0175	0	0	0	0	0	0	0	0.0184	0	0	0	0	0	0	0	0	0.018	0	0	0	0	0	0	0
[1225] #CNPEL1575-14|KR241290|BIOUG10653-C07|Ctenosciara_hyalipennis|COI-5P	CNPEL1575-14	ENEA	0	0	0	0.0017	0.0018	0.0017	0.0017	0.019	0.0017	0.0017	0.0017	0.0194	0.0018	0.0017	0.0018	0.0017	0.0018	0.0018	0.0017	0.0017	0.0017	0.0017	0.0193	0.0017	0.0017	0.0017	0.0017	0.0017	0.0018	0.0017	0.0202	0.0017	0.0018	0.0017	0.0017	0.0017	0.0017	0.0017	0.0017	0.0195	0.0018	0.0017	0.0018	0.0018	0.0018	0.0017	0.0017
[1226] #CNPEL1577-14|KR242760|BIOUG10653-C09|Ctenosciara_hyalipennis|COI-5P	CNPEL1577-14	ENEA	0.0018	0.0018	0.0018	0	0	0	0	0.0184	0	0	0	0.0184	0	0	0	0	0	0	0	0	0	0	0.0184	0	0	0	0	0	0	0	0.0189	0	0	0	0	0	0	0	0	0.0184	0	0	0	0	0	0	0
[1227] #CNPEL1578-14|KR236434|BIOUG10653-C10|Ctenosciara_hyalipennis|COI-5P	CNPEL1578-14	ENEA	0	0	0	0.0017	0.0018	0.0017	0.0017	0.019	0.0017	0.0017	0.0017	0.0194	0.0018	0.0017	0.0018	0.0017	0.0018	0.0018	0.0017	0.0017	0.0017	0.0017	0.0193	0.0017	0.0017	0.0017	0.0017	0.0017	0.0018	0.0017	0.0202	0.0017	0.0018	0.0017	0.0017	0.0017	0.0017	0.0017	0.0017	0.0195	0.0018	0.0017	0.0018	0.0018	0.0018	0.0017	0.0017
[1228] #CNPEL1584-14|KR246493|BIOUG10653-D04|Ctenosciara_hyalipennis|COI-5P	CNPEL1584-14	ENEA	0.0018	0.0018	0.0018	0	0	0	0	0.0183	0	0	0	0.0183	0	0	0	0	0	0	0	0	0	0	0.0183	0	0	0	0	0	0	0	0.0188	0	0	0	0	0	0	0	0	0.0183	0	0	0	0	0	0	0
[1229] #CNPEL1587-14|KR254039|BIOUG10653-D07|Ctenosciara_hyalipennis|COI-5P	CNPEL1587-14	ENEA	0	0	0	0.0017	0.0018	0.0017	0.0017	0.0194	0.0017	0.0017	0.0017	0.0197	0.0018	0.0017	0.0018	0.0017	0.0018	0.0018	0.0017	0.0018	0.0017	0.0017	0.0194	0.0017	0.0017	0.0017	0.0017	0.0017	0.0018	0.0017	0.0203	0.0017	0.0018	0.0017	0.0017	0.0018	0.0018	0.0017	0.0017	0.0199	0.0018	0.0017	0.0018	0.0018	0.0018	0.0017	0.0017
[1230] #CNPEL1596-14|KR245302|BIOUG10653-E04|Ctenosciara_hyalipennis|COI-5P	CNPEL1596-14	ENEA	0.0018	0.0018	0.0018	0	0	0	0	0.0163	0	0	0	0.0163	0	0	0	0	0	0	0	0	0	0	0.0165	0	0	0	0	0	0	0	0.017	0	0	0	0	0	0	0	0	0.0163	0	0	0	0	0	0	0
[1231] #CNPEL1597-14|KR249492|BIOUG10653-E05|Ctenosciara_hyalipennis|COI-5P	CNPEL1597-14	ENEA	0.0018	0.0018	0.0018	0	0	0	0	0.0183	0	0	0	0.0183	0	0	0	0	0	0	0	0	0	0	0.0183	0	0	0	0	0	0	0	0.0188	0	0	0	0	0	0	0	0	0.0183	0	0	0	0	0	0	0
[1232] #CNPEL1610-14|KR234868|BIOUG10653-F06|Ctenosciara_hyalipennis|COI-5P	CNPEL1610-14	ENEA	0	0	0	0.0018	0.0019	0.0018	0.0019	0.0203	0.0018	0.0018	0.0018	0.0203	0.0019	0.0018	0.0018	0.0018	0.0018	0.0019	0.0018	0.0018	0.0018	0.0018	0.0206	0.0018	0.0018	0.0018	0.0018	0.0018	0.0019	0.0018	0.0212	0.0018	0.0019	0.0018	0.0018	0.0018	0.0018	0.0019	0.0018	0.0203	0.0019	0.0019	0.0018	0.0019	0.0019	0.0018	0.0018
[1233] #CNPEL1618-14|KR258679|BIOUG10653-G02|Ctenosciara_hyalipennis|COI-5P	CNPEL1618-14	ENEA	0.0017	0.0017	0.0017	0	0	0	0	0.0173	0	0	0	0.0176	0	0	0	0	0	0	0	0	0	0	0.0175	0	0	0	0	0	0	0	0.0184	0	0	0	0	0	0	0	0	0.0177	0	0	0	0	0	0	0
[1234] #CNPEL1619-14|KR237865|BIOUG10653-G03|Ctenosciara_hyalipennis|COI-5P	CNPEL1619-14	ENEA	0	0	0	0.0017	0.0018	0.0017	0.0017	0.0189	0.0017	0.0017	0.0017	0.0194	0.0018	0.0017	0.0018	0.0017	0.0018	0.0018	0.0017	0.0017	0.0017	0.0017	0.0193	0.0017	0.0017	0.0017	0.0017	0.0017	0.0018	0.0017	0.0202	0.0017	0.0018	0.0017	0.0017	0.0017	0.0017	0.0017	0.0017	0.0195	0.0018	0.0017	0.0018	0.0018	0.0018	0.0017	0.0017
[1235] #CNPEL1624-14|KR256891|BIOUG10653-G08|Ctenosciara_hyalipennis|COI-5P	CNPEL1624-14	ENEA	0.0019	0.0019	0.0019	0	0	0	0	0.0155	0	0	0	0.0155	0	0	0	0	0	0	0	0	0	0	0.0155	0	0	0	0	0	0	0	0.0159	0	0	0	0	0	0	0	0	0.0155	0	0	0	0	0	0	0
[1236] #CNPEL1635-14|KR253395|BIOUG10653-H07|Ctenosciara_hyalipennis|COI-5P	CNPEL1635-14	ENEA	0	0	0	0.0017	0.0018	0.0017	0.0017	0.0189	0.0017	0.0017	0.0017	0.0194	0.0018	0.0017	0.0018	0.0017	0.0018	0.0018	0.0017	0.0017	0.0017	0.0017	0.0193	0.0017	0.0017	0.0017	0.0017	0.0017	0.0018	0.0017	0.0202	0.0017	0.0018	0.0017	0.0017	0.0017	0.0017	0.0017	0.0017	0.0195	0.0018	0.0017	0.0018	0.0018	0.0018	0.0017	0.0017
[1237] #CNPEL1637-14|KR243542|BIOUG10653-H09|Ctenosciara_hyalipennis|COI-5P	CNPEL1637-14	ENEA	0.0017	0.0017	0.0017	0	0	0	0	0.0173	0	0	0	0.0176	0	0	0	0	0	0	0	0	0	0	0.0175	0	0	0	0	0	0	0	0.0184	0	0	0	0	0	0	0	0	0.0177	0	0	0	0	0	0	0
[1238] #CNPEL1654-14|KR242591|BIOUG10654-B03|Ctenosciara_hyalipennis|COI-5P	CNPEL1654-14	ENEA	0	0	0	0.0017	0.0018	0.0017	0.0017	0.0189	0.0017	0.0017	0.0017	0.0194	0.0018	0.0017	0.0018	0.0017	0.0018	0.0018	0.0017	0.0017	0.0017	0.0017	0.0193	0.0017	0.0017	0.0017	0.0017	0.0017	0.0018	0.0017	0.0202	0.0017	0.0018	0.0017	0.0017	0.0017	0.0017	0.0017	0.0017	0.0195	0.0018	0.0017	0.0018	0.0018	0.0018	0.0017	0.0017
[1239] #CNPEL1662-14|KR244749|BIOUG10654-B11|Ctenosciara_hyalipennis|COI-5P	CNPEL1662-14	ENEA	0.0019	0.0019	0.0019	0	0	0	0	0.017	0	0	0	0.017	0	0	0	0	0	0	0	0	0	0	0.0172	0	0	0	0	0	0	0	0.0178	0	0	0	0	0	0	0	0	0.017	0	0	0	0	0	0	0
[1240] #CNPEL1668-14|KR256676|BIOUG10654-C05|Ctenosciara_hyalipennis|COI-5P	CNPEL1668-14	ENEA	0	0	0	0.0017	0.0018	0.0017	0.0017	0.019	0.0017	0.0017	0.0017	0.0194	0.0018	0.0017	0.0018	0.0017	0.0018	0.0018	0.0017	0.0017	0.0017	0.0017	0.0193	0.0017	0.0017	0.0017	0.0017	0.0017	0.0018	0.0017	0.0202	0.0017	0.0018	0.0017	0.0017	0.0017	0.0017	0.0017	0.0017	0.0195	0.0018	0.0017	0.0018	0.0018	0.0018	0.0017	0.0017
[1241] #CNPEL1678-14|KR256809|BIOUG10654-D03|Ctenosciara_hyalipennis|COI-5P	CNPEL1678-14	ENEA	0.0017	0.0017	0.0017	0	0	0	0	0.0173	0	0	0	0.0176	0	0	0	0	0	0	0	0	0	0	0.0175	0	0	0	0	0	0	0	0.0184	0	0	0	0	0	0	0	0	0.0177	0	0	0	0	0	0	0
[1242] #CNPEL1686-14|KR238748|BIOUG10654-D11|Ctenosciara_hyalipennis|COI-5P	CNPEL1686-14	ENEA	0	0	0	0.0017	0.0018	0.0017	0.0017	0.019	0.0017	0.0017	0.0017	0.0194	0.0018	0.0017	0.0018	0.0017	0.0018	0.0018	0.0017	0.0017	0.0017	0.0017	0.0193	0.0017	0.0017	0.0017	0.0017	0.0017	0.0018	0.0017	0.0202	0.0017	0.0018	0.0017	0.0017	0.0017	0.0017	0.0017	0.0017	0.0195	0.0018	0.0017	0.0018	0.0018	0.0018	0.0017	0.0017
[1243] #CNPEL1689-14|KR239756|BIOUG10654-E02|Ctenosciara_hyalipennis|COI-5P	CNPEL1689-14	ENEA	0	0	0	0.0018	0.0019	0.0018	0.0018	0.0199	0.0018	0.0018	0.0018	0.0199	0.0019	0.0018	0.0018	0.0018	0.0018	0.0019	0.0018	0.0018	0.0018	0.0018	0.0201	0.0018	0.0018	0.0018	0.0018	0.0018	0.0019	0.0018	0.0208	0.0018	0.0019	0.0018	0.0018	0.0018	0.0018	0.0018	0.0018	0.0199	0.0019	0.0018	0.0018	0.0019	0.0019	0.0018	0.0018
[1244] #CNPEL1692-14|KR238107|BIOUG10654-E05|Ctenosciara_hyalipennis|COI-5P	CNPEL1692-14	ENEA	0	0	0	0.0018	0.0019	0.0018	0.0018	0.0199	0.0018	0.0018	0.0018	0.0199	0.0019	0.0018	0.0018	0.0018	0.0018	0.0019	0.0018	0.0018	0.0018	0.0018	0.0201	0.0018	0.0018	0.0018	0.0018	0.0018	0.0019	0.0018	0.0208	0.0018	0.0019	0.0018	0.0018	0.0018	0.0018	0.0018	0.0018	0.0199	0.0019	0.0018	0.0018	0.0019	0.0019	0.0018	0.0018
[1245] #CNPEL1697-14|KR254316|BIOUG10654-E10|Ctenosciara_hyalipennis|COI-5P	CNPEL1697-14	ENEA	0	0	0	0.0017	0.0018	0.0017	0.0017	0.019	0.0017	0.0017	0.0017	0.0194	0.0018	0.0017	0.0018	0.0017	0.0018	0.0018	0.0017	0.0017	0.0017	0.0017	0.0193	0.0017	0.0017	0.0017	0.0017	0.0017	0.0018	0.0017	0.0202	0.0017	0.0018	0.0017	0.0017	0.0017	0.0017	0.0017	0.0017	0.0195	0.0018	0.0017	0.0018	0.0018	0.0018	0.0017	0.0017
[1246] #CNPEL170-14|KR245289|BIOUG10618-E03|Ctenosciara_hyalipennis|COI-5P	CNPEL170-14	ENEA	0.0017	0.0017	0.0017	0	0	0	0	0.0172	0	0	0	0.0175	0	0	0	0	0	0	0	0	0	0	0.0175	0	0	0	0	0	0	0	0.0184	0	0	0	0	0	0	0	0	0.0177	0	0	0	0	0	0	0
[1247] #CNPEL1700-14|KR240269|BIOUG10654-F01|Ctenosciara_hyalipennis|COI-5P	CNPEL1700-14	ENEA	0.0017	0.0017	0.0017	0	0	0	0	0.0173	0	0	0	0.0176	0	0	0	0	0	0	0	0	0	0	0.0175	0	0	0	0	0	0	0	0.0184	0	0	0	0	0	0	0	0	0.0177	0	0	0	0	0	0	0
[1248] #CNPEL1709-14|KR250276|BIOUG10654-F10|Ctenosciara_hyalipennis|COI-5P	CNPEL1709-14	ENEA	0	0	0	0.0017	0.0018	0.0017	0.0017	0.019	0.0017	0.0017	0.0017	0.0194	0.0018	0.0017	0.0018	0.0017	0.0018	0.0018	0.0017	0.0017	0.0017	0.0017	0.0193	0.0017	0.0017	0.0017	0.0017	0.0017	0.0018	0.0017	0.0202	0.0017	0.0018	0.0017	0.0017	0.0017	0.0017	0.0017	0.0017	0.0195	0.0018	0.0017	0.0018	0.0018	0.0018	0.0017	0.0017
[1249] #CNPEL1712-14|KR237888|BIOUG10654-G01|Ctenosciara_hyalipennis|COI-5P	CNPEL1712-14	ENEA	0	0	0	0.0017	0.0018	0.0017	0.0017	0.0191	0.0017	0.0017	0.0017	0.0194	0.0018	0.0017	0.0018	0.0017	0.0018	0.0018	0.0017	0.0017	0.0017	0.0017	0.0194	0.0017	0.0017	0.0017	0.0017	0.0017	0.0018	0.0017	0.0202	0.0017	0.0018	0.0017	0.0017	0.0017	0.0017	0.0017	0.0017	0.0195	0.0018	0.0018	0.0018	0.0018	0.0018	0.0017	0.0017
[1250] #CNPEL1715-14|KR250702|BIOUG10654-G04|Ctenosciara_hyalipennis|COI-5P	CNPEL1715-14	ENEA	0.0017	0.0017	0.0017	0	0	0	0	0.0172	0	0	0	0.0176	0	0	0	0	0	0	0	0	0	0	0.0175	0	0	0	0	0	0	0	0.0184	0	0	0	0	0	0	0	0	0.0177	0	0	0	0	0	0	0
[1251] #CNPEL1718-14|KR253068|BIOUG10654-G07|Ctenosciara_hyalipennis|COI-5P	CNPEL1718-14	ENEA	0.0017	0.0017	0.0017	0	0	0	0	0.0173	0	0	0	0.0176	0	0	0	0	0	0	0	0	0	0	0.0175	0	0	0	0	0	0	0	0.0184	0	0	0	0	0	0	0	0	0.0178	0	0	0	0	0	0	0
[1252] #CNPEL1727-14|KR240641|BIOUG10654-H04|Ctenosciara_hyalipennis|COI-5P	CNPEL1727-14	ENEA	0.0017	0.0017	0.0017	0	0	0	0	0.0175	0	0	0	0.0176	0	0	0	0	0	0	0	0	0	0	0.0177	0	0	0	0	0	0	0	0.0184	0	0	0	0	0	0	0	0	0.0177	0	0	0	0	0	0	0
[1253] #CNPEL1728-14|KR241497|BIOUG10654-H05|Ctenosciara_hyalipennis|COI-5P	CNPEL1728-14	ENEA	0	0	0	0.0017	0.0018	0.0017	0.0017	0.0192	0.0017	0.0017	0.0017	0.0197	0.0018	0.0017	0.0018	0.0017	0.0018	0.0018	0.0017	0.0018	0.0017	0.0017	0.0193	0.0017	0.0017	0.0017	0.0017	0.0017	0.0018	0.0017	0.0202	0.0017	0.0018	0.0017	0.0017	0.0018	0.0018	0.0017	0.0017	0.0199	0.0018	0.0017	0.0018	0.0018	0.0018	0.0017	0.0017
[1254] #CNPEL173-14|KR239865|BIOUG10618-E06|Ctenosciara_hyalipennis|COI-5P	CNPEL173-14	ENEA	0.0018	0.0018	0.0018	0	0	0	0	0.0168	0	0	0	0.017	0	0	0	0	0	0	0	0	0	0	0.0168	0	0	0	0	0	0	0	0.017	0	0	0	0	0	0	0	0	0.0172	0	0	0	0	0	0	0
[1255] #CNPEL1738-14|KR245997|BIOUG10655-A04|Ctenosciara_hyalipennis|COI-5P	CNPEL1738-14	ENEA	0.0017	0.0017	0.0017	0	0	0	0	0.0176	0	0	0	0.0176	0	0	0	0	0	0	0	0	0	0	0.0179	0	0	0	0	0	0	0	0.0184	0	0	0	0	0	0	0	0	0.0177	0	0	0	0	0	0	0
[1256] #CNPEL174-14|KR234225|BIOUG10618-E07|Ctenosciara_hyalipennis|COI-5P	CNPEL174-14	ENEA	0.0017	0.0017	0.0017	0	0	0	0	0.0175	0	0	0	0.0179	0	0	0	0	0	0	0	0	0	0	0.0175	0	0	0	0	0	0	0	0.0184	0	0	0	0	0	0	0	0	0.018	0	0	0	0	0	0	0
[1257] #CNPEL1740-14|KR244513|BIOUG10655-A06|Ctenosciara_hyalipennis|COI-5P	CNPEL1740-14	ENEA	0.0017	0.0017	0.0017	0	0	0	0	0.0172	0	0	0	0.0176	0	0	0	0	0	0	0	0	0	0	0.0175	0	0	0	0	0	0	0	0.0184	0	0	0	0	0	0	0	0	0.0178	0	0	0	0	0	0	0
[1258] #CNPEL1743-14|KR252358|BIOUG10655-A09|Ctenosciara_hyalipennis|COI-5P	CNPEL1743-14	ENEA	0.0017	0.0017	0.0017	0	0	0	0	0.0173	0	0	0	0.0176	0	0	0	0	0	0	0	0	0	0	0.0175	0	0	0	0	0	0	0	0.0184	0	0	0	0	0	0	0	0	0.0177	0	0	0	0	0	0	0
[1259] #CNPEL1745-14|KR241051|BIOUG10655-A11|Ctenosciara_hyalipennis|COI-5P	CNPEL1745-14	ENEA	0	0	0	0.0017	0.0018	0.0017	0.0017	0.019	0.0017	0.0017	0.0017	0.0194	0.0018	0.0017	0.0018	0.0017	0.0018	0.0018	0.0017	0.0017	0.0017	0.0017	0.0193	0.0017	0.0017	0.0017	0.0017	0.0017	0.0018	0.0017	0.0202	0.0017	0.0018	0.0017	0.0017	0.0017	0.0017	0.0017	0.0017	0.0195	0.0018	0.0017	0.0018	0.0018	0.0018	0.0017	0.0017
[1260] #CNPEL1746-14|KR236365|BIOUG10655-A12|Ctenosciara_hyalipennis|COI-5P	CNPEL1746-14	ENEA	0.0017	0.0017	0.0017	0	0	0	0	0.0172	0	0	0	0.0176	0	0	0	0	0	0	0	0	0	0	0.0175	0	0	0	0	0	0	0	0.0184	0	0	0	0	0	0	0	0	0.0177	0	0	0	0	0	0	0
[1261] #CNPEL1752-14|KR248845|BIOUG10655-B06|Ctenosciara_hyalipennis|COI-5P	CNPEL1752-14	ENEA	0.0017	0.0017	0.0017	0	0	0	0	0.0176	0	0	0	0.0176	0	0	0	0	0	0	0	0	0	0	0.0179	0	0	0	0	0	0	0	0.0184	0	0	0	0	0	0	0	0	0.0177	0	0	0	0	0	0	0
[1262] #CNPEL1753-14|KR250044|BIOUG10655-B07|Ctenosciara_hyalipennis|COI-5P	CNPEL1753-14	ENEA	0	0	0	0.0019	0.0019	0.0018	0.0019	0.0186	0.0018	0.0018	0.0019	0.0186	0.0019	0.0019	0.0019	0.0018	0.0019	0.0019	0.0018	0.0018	0.0019	0.0019	0.0189	0.0018	0.0018	0.0018	0.0018	0.0019	0.0019	0.0018	0.0195	0.0018	0.0019	0.0018	0.0018	0.0018	0.0018	0.0019	0.0019	0.0186	0.0019	0.0019	0.0019	0.0019	0.0019	0.0018	0.0019
[1263] #CNPEL1754-14|KR252679|BIOUG10655-B08|Ctenosciara_hyalipennis|COI-5P	CNPEL1754-14	ENEA	0.0019	0.0019	0.0019	0	0	0	0	0.015	0	0	0	0.015	0	0	0	0	0	0	0	0	0	0	0.0152	0	0	0	0	0	0	0	0.0157	0	0	0	0	0	0	0	0	0.015	0	0	0	0	0	0	0
[1264] #CNPEL1763-14|KR243214|BIOUG10655-C05|Ctenosciara_hyalipennis|COI-5P	CNPEL1763-14	ENEA	0	0	0	0.0018	0.0019	0.0018	0.0019	0.0203	0.0018	0.0018	0.0018	0.0203	0.0019	0.0018	0.0018	0.0018	0.0018	0.0019	0.0018	0.0018	0.0018	0.0018	0.0206	0.0018	0.0018	0.0018	0.0018	0.0018	0.0019	0.0018	0.0212	0.0018	0.0019	0.0018	0.0018	0.0018	0.0018	0.0019	0.0018	0.0203	0.0019	0.0019	0.0018	0.0019	0.0019	0.0018	0.0018
[1265] #CNPEL1770-14|KR247607|BIOUG10655-C12|Ctenosciara_hyalipennis|COI-5P	CNPEL1770-14	ENEA	0	0	0	0.0017	0.0018	0.0017	0.0017	0.019	0.0017	0.0017	0.0017	0.0194	0.0018	0.0017	0.0018	0.0017	0.0018	0.0018	0.0017	0.0017	0.0017	0.0017	0.0193	0.0017	0.0017	0.0017	0.0017	0.0017	0.0018	0.0017	0.0202	0.0017	0.0018	0.0017	0.0017	0.0017	0.0017	0.0017	0.0017	0.0195	0.0018	0.0017	0.0018	0.0018	0.0018	0.0017	0.0017
[1266] #CNPEL1778-14|KR248425|BIOUG10655-D08|Ctenosciara_hyalipennis|COI-5P	CNPEL1778-14	ENEA	0.0017	0.0017	0.0017	0	0	0	0	0.0173	0	0	0	0.0176	0	0	0	0	0	0	0	0	0	0	0.0175	0	0	0	0	0	0	0	0.0184	0	0	0	0	0	0	0	0	0.0177	0	0	0	0	0	0	0
[1267] #CNPEL1781-14|KR241048|BIOUG10655-D11|Ctenosciara_hyalipennis|COI-5P	CNPEL1781-14	ENEA	0.0017	0.0017	0.0017	0	0	0	0	0.0173	0	0	0	0.0176	0	0	0	0	0	0	0	0	0	0	0.0175	0	0	0	0	0	0	0	0.0184	0	0	0	0	0	0	0	0	0.0177	0	0	0	0	0	0	0
[1268] #CNPEL1799-14|KR244487|BIOUG10655-F05|Ctenosciara_hyalipennis|COI-5P	CNPEL1799-14	ENEA	0.0018	0.0018	0.0018	0	0	0	0	0.0184	0	0	0	0.0184	0	0	0	0	0	0	0	0	0	0	0.0187	0	0	0	0	0	0	0	0.0193	0	0	0	0	0	0	0	0	0.0184	0	0	0	0	0	0	0
[1269] #CNPEL1802-14|KR251293|BIOUG10655-F08|Ctenosciara_hyalipennis|COI-5P	CNPEL1802-14	ENEA	0.0017	0.0017	0.0017	0	0	0	0	0.0173	0	0	0	0.0176	0	0	0	0	0	0	0	0	0	0	0.0175	0	0	0	0	0	0	0	0.0184	0	0	0	0	0	0	0	0	0.0177	0	0	0	0	0	0	0
[1270] #CNPEL1807-14|KR234500|BIOUG10655-G01|Ctenosciara_hyalipennis|COI-5P	CNPEL1807-14	ENEA	0.0017	0.0017	0.0017	0	0	0	0	0.0176	0	0	0	0.0176	0	0	0	0	0	0	0	0	0	0	0.0179	0	0	0	0	0	0	0	0.0184	0	0	0	0	0	0	0	0	0.0177	0	0	0	0	0	0	0
[1271] #CNPEL1813-14|KR253296|BIOUG10655-G07|Ctenosciara_hyalipennis|COI-5P	CNPEL1813-14	ENEA	0.0018	0.0018	0.0018	0	0	0	0	0.0184	0	0	0	0.0184	0	0	0	0	0	0	0	0	0	0	0.0187	0	0	0	0	0	0	0	0.0193	0	0	0	0	0	0	0	0	0.0184	0	0	0	0	0	0	0
[1272] #CNPEL1816-14|KR250515|BIOUG10655-G10|Ctenosciara_hyalipennis|COI-5P	CNPEL1816-14	ENEA	0	0	0	0.0018	0.0019	0.0018	0.0018	0.02	0.0018	0.0018	0.0018	0.02	0.0019	0.0018	0.0018	0.0018	0.0018	0.0019	0.0018	0.0018	0.0018	0.0018	0.0202	0.0018	0.0018	0.0018	0.0018	0.0018	0.0019	0.0018	0.0209	0.0018	0.0019	0.0018	0.0018	0.0018	0.0018	0.0018	0.0018	0.02	0.0019	0.0018	0.0018	0.0019	0.0019	0.0018	0.0018
[1273] #CNPEL182-14|KR256532|BIOUG10618-F03|Ctenosciara_hyalipennis|COI-5P	CNPEL182-14	ENEA	0.0017	0.0017	0.0017	0	0	0	0	0.0172	0	0	0	0.0175	0	0	0	0	0	0	0	0	0	0	0.0175	0	0	0	0	0	0	0	0.0184	0	0	0	0	0	0	0	0	0.0177	0	0	0	0	0	0	0
[1274] #CNPEL1823-14|KR237351|BIOUG10655-H05|Ctenosciara_hyalipennis|COI-5P	CNPEL1823-14	ENEA	0.0017	0.0017	0.0017	0.0035	0.0036	0.0034	0.0035	0.0208	0.0034	0.0034	0.0035	0.0211	0.0037	0.0035	0.0035	0.0034	0.0035	0.0036	0.0034	0.0035	0.0035	0.0035	0.021	0.0034	0.0034	0.0034	0.0034	0.0035	0.0036	0.0034	0.0221	0.0034	0.0036	0.0034	0.0034	0.0035	0.0035	0.0035	0.0035	0.0213	0.0036	0.0035	0.0035	0.0036	0.0036	0.0034	0.0035
[1275] #CNPEL183-14|KR240294|BIOUG10618-F04|Ctenosciara_hyalipennis|COI-5P	CNPEL183-14	ENEA	0.0017	0.0017	0.0017	0	0	0	0	0.0172	0	0	0	0.0175	0	0	0	0	0	0	0	0	0	0	0.0175	0	0	0	0	0	0	0	0.0184	0	0	0	0	0	0	0	0	0.0177	0	0	0	0	0	0	0
[1276] #CNPEL1839-14|KR248401|BIOUG10656-A10|Ctenosciara_hyalipennis|COI-5P	CNPEL1839-14	ENEA	0	0	0	0.0018	0.0019	0.0018	0.0018	0.0205	0.0018	0.0018	0.0018	0.0205	0.0019	0.0018	0.0018	0.0018	0.0018	0.0019	0.0018	0.0018	0.0018	0.0018	0.0205	0.0018	0.0018	0.0018	0.0018	0.0018	0.0019	0.0018	0.0211	0.0018	0.0019	0.0018	0.0018	0.0018	0.0018	0.0018	0.0018	0.0205	0.0019	0.0018	0.0018	0.0019	0.0019	0.0018	0.0018
[1277] #CNPEL1845-14|KR238537|BIOUG10656-B04|Ctenosciara_hyalipennis|COI-5P	CNPEL1845-14	ENEA	0.0017	0.0017	0.0017	0	0	0	0	0.0172	0	0	0	0.0176	0	0	0	0	0	0	0	0	0	0	0.0175	0	0	0	0	0	0	0	0.0184	0	0	0	0	0	0	0	0	0.0177	0	0	0	0	0	0	0
[1278] #CNPEL1846-14|KR254195|BIOUG10656-B05|Ctenosciara_hyalipennis|COI-5P	CNPEL1846-14	ENEA	0.0018	0.0018	0.0018	0	0	0	0	0.0181	0	0	0	0.0181	0	0	0	0	0	0	0	0	0	0	0.0184	0	0	0	0	0	0	0	0.0189	0	0	0	0	0	0	0	0	0.0181	0	0	0	0	0	0	0
[1279] #CNPEL1848-14|KR243333|BIOUG10656-B07|Ctenosciara_hyalipennis|COI-5P	CNPEL1848-14	ENEA	0.0017	0.0017	0.0017	0	0	0	0	0.0173	0	0	0	0.0176	0	0	0	0	0	0	0	0	0	0	0.0175	0	0	0	0	0	0	0	0.0184	0	0	0	0	0	0	0	0	0.0177	0	0	0	0	0	0	0
[1280] #CNPEL1851-14|KR238945|BIOUG10656-B10|Ctenosciara_hyalipennis|COI-5P	CNPEL1851-14	ENEA	0.0018	0.0018	0.0018	0	0	0	0	0.018	0	0	0	0.018	0	0	0	0	0	0	0	0	0	0	0.0183	0	0	0	0	0	0	0	0.0188	0	0	0	0	0	0	0	0	0.018	0	0	0	0	0	0	0
[1281] #CNPEL1854-14|KR237529|BIOUG10656-C01|Ctenosciara_hyalipennis|COI-5P	CNPEL1854-14	ENEA	0.0017	0.0017	0.0017	0	0	0	0	0.0176	0	0	0	0.018	0	0	0	0	0	0	0	0	0	0	0.0176	0	0	0	0	0	0	0	0.0184	0	0	0	0	0	0	0	0	0.0181	0	0	0	0	0	0	0
[1282] #CNPEL1855-14|KR235171|BIOUG10656-C02|Ctenosciara_hyalipennis|COI-5P	CNPEL1855-14	ENEA	0.0017	0.0017	0.0017	0	0	0	0	0.0172	0	0	0	0.0176	0	0	0	0	0	0	0	0	0	0	0.0175	0	0	0	0	0	0	0	0.0184	0	0	0	0	0	0	0	0	0.0177	0	0	0	0	0	0	0
[1283] #CNPEL1858-14|KR238983|BIOUG10656-C05|Ctenosciara_hyalipennis|COI-5P	CNPEL1858-14	ENEA	0.0017	0.0017	0.0017	0	0	0	0	0.0173	0	0	0	0.0176	0	0	0	0	0	0	0	0	0	0	0.0175	0	0	0	0	0	0	0	0.0184	0	0	0	0	0	0	0	0	0.0177	0	0	0	0	0	0	0
[1284] #CNPEL186-14|KR235375|BIOUG10618-F07|Ctenosciara_hyalipennis|COI-5P	CNPEL186-14	ENEA	0.0018	0.0018	0.0018	0	0	0	0	0.018	0	0	0	0.018	0	0	0	0	0	0	0	0	0	0	0.0183	0	0	0	0	0	0	0	0.0188	0	0	0	0	0	0	0	0	0.018	0	0	0	0	0	0	0
[1285] #CNPEL1863-14|KR244044|BIOUG10656-C10|Ctenosciara_hyalipennis|COI-5P	CNPEL1863-14	ENEA	0.0017	0.0017	0.0017	0	0	0	0	0.0176	0	0	0	0.0176	0	0	0	0	0	0	0	0	0	0	0.0179	0	0	0	0	0	0	0	0.0184	0	0	0	0	0	0	0	0	0.0177	0	0	0	0	0	0	0
[1286] #CNPEL1879-14|KR248406|BIOUG10656-E02|Ctenosciara_hyalipennis|COI-5P	CNPEL1879-14	ENEA	0.0017	0.0017	0.0017	0	0	0	0	0.0173	0	0	0	0.0176	0	0	0	0	0	0	0	0	0	0	0.0175	0	0	0	0	0	0	0	0.0184	0	0	0	0	0	0	0	0	0.0177	0	0	0	0	0	0	0
[1287] #CNPEL1887-14|KR246313|BIOUG10656-E10|Ctenosciara_hyalipennis|COI-5P	CNPEL1887-14	ENEA	0.0017	0.0017	0.0017	0	0	0	0	0.0175	0	0	0	0.0179	0	0	0	0	0	0	0	0	0	0	0.0175	0	0	0	0	0	0	0	0.0184	0	0	0	0	0	0	0	0	0.018	0	0	0	0	0	0	0
[1288] #CNPEL1888-14|KR252956|BIOUG10656-E11|Ctenosciara_hyalipennis|COI-5P	CNPEL1888-14	ENEA	0	0	0	0.0017	0.0018	0.0017	0.0017	0.019	0.0017	0.0017	0.0017	0.0194	0.0018	0.0017	0.0018	0.0017	0.0018	0.0018	0.0017	0.0017	0.0017	0.0017	0.0193	0.0017	0.0017	0.0017	0.0017	0.0017	0.0018	0.0017	0.0202	0.0017	0.0018	0.0017	0.0017	0.0017	0.0017	0.0017	0.0017	0.0195	0.0018	0.0017	0.0018	0.0018	0.0018	0.0017	0.0017
[1289] #CNPEL1889-14|KR257797|BIOUG10656-E12|Ctenosciara_hyalipennis|COI-5P	CNPEL1889-14	ENEA	0.0018	0.0018	0.0018	0	0	0	0	0.0183	0	0	0	0.0183	0	0	0	0	0	0	0	0	0	0	0.0183	0	0	0	0	0	0	0	0.0188	0	0	0	0	0	0	0	0	0.0183	0	0	0	0	0	0	0
[1290] #CNPEL189-14|KR251125|BIOUG10618-F10|Ctenosciara_hyalipennis|COI-5P	CNPEL189-14	ENEA	0.0019	0.0019	0.0019	0	0	0	0	0.0188	0	0	0	0.0188	0	0	0	0	0	0	0	0	0	0	0.0188	0	0	0	0	0	0	0	0.0188	0	0	0	0	0	0	0	0	0.0189	0	0	0	0	0	0	0
[1291] #CNPEL1896-14|KR258544|BIOUG10656-F07|Ctenosciara_hyalipennis|COI-5P	CNPEL1896-14	ENEA	0	0	0	0.0017	0.0018	0.0017	0.0017	0.0194	0.0017	0.0017	0.0017	0.0198	0.0018	0.0017	0.0018	0.0017	0.0018	0.0018	0.0017	0.0018	0.0017	0.0017	0.0194	0.0017	0.0017	0.0017	0.0017	0.0017	0.0018	0.0017	0.0202	0.0017	0.0018	0.0017	0.0017	0.0018	0.0018	0.0017	0.0017	0.02	0.0018	0.0017	0.0018	0.0018	0.0018	0.0017	0.0017
[1292] #CNPEL1898-14|KR247794|BIOUG10656-F09|Ctenosciara_hyalipennis|COI-5P	CNPEL1898-14	ENEA	0.0017	0.0017	0.0017	0	0	0	0	0.0172	0	0	0	0.0176	0	0	0	0	0	0	0	0	0	0	0.0175	0	0	0	0	0	0	0	0.0184	0	0	0	0	0	0	0	0	0.0177	0	0	0	0	0	0	0
[1293] #CNPEL1900-14|KR255836|BIOUG10656-F11|Ctenosciara_hyalipennis|COI-5P	CNPEL1900-14	ENEA	0.0019	0.0019	0.0019	0	0	0	0	0.0173	0	0	0	0.0173	0	0	0	0	0	0	0	0	0	0	0.0173	0	0	0	0	0	0	0	0.0178	0	0	0	0	0	0	0	0	0.0173	0	0	0	0	0	0	0
[1294] #CNPEL1909-14|KR243966|BIOUG10656-G08|Ctenosciara_hyalipennis|COI-5P	CNPEL1909-14	ENEA	0.0018	0.0018	0.0018	0	0	0	0	0.0181	0	0	0	0.0181	0	0	0	0	0	0	0	0	0	0	0.0183	0	0	0	0	0	0	0	0.0189	0	0	0	0	0	0	0	0	0.0181	0	0	0	0	0	0	0
[1295] #CNPEL1912-14|KR254607|BIOUG10656-G11|Ctenosciara_hyalipennis|COI-5P	CNPEL1912-14	ENEA	0.0018	0.0018	0.0018	0	0	0	0	0.018	0	0	0	0.018	0	0	0	0	0	0	0	0	0	0	0.0183	0	0	0	0	0	0	0	0.0188	0	0	0	0	0	0	0	0	0.018	0	0	0	0	0	0	0
[1296] #CNPEL192-14|KR254212|BIOUG10618-G01|Ctenosciara_hyalipennis|COI-5P	CNPEL192-14	ENEA	0.0017	0.0017	0.0017	0	0	0	0	0.0172	0	0	0	0.0175	0	0	0	0	0	0	0	0	0	0	0.0175	0	0	0	0	0	0	0	0.0184	0	0	0	0	0	0	0	0	0.0177	0	0	0	0	0	0	0
[1297] #CNPEL200-14|KR251686|BIOUG10618-G09|Ctenosciara_hyalipennis|COI-5P	CNPEL200-14	ENEA	0.0018	0.0018	0.0018	0	0	0	0	0.0168	0	0	0	0.017	0	0	0	0	0	0	0	0	0	0	0.0168	0	0	0	0	0	0	0	0.017	0	0	0	0	0	0	0	0	0.0172	0	0	0	0	0	0	0
[1298] #CNPEL210-14|KR250056|BIOUG10618-H07|Ctenosciara_hyalipennis|COI-5P	CNPEL210-14	ENEA	0.0018	0.0018	0.0018	0	0	0	0	0.018	0	0	0	0.018	0	0	0	0	0	0	0	0	0	0	0.018	0	0	0	0	0	0	0	0.0185	0	0	0	0	0	0	0	0	0.0181	0	0	0	0	0	0	0
[1299] #CNPEL215-14|KR235349|BIOUG10619-A01|Ctenosciara_hyalipennis|COI-5P	CNPEL215-14	ENEA	0.0017	0.0017	0.0017	0	0	0	0	0.0175	0	0	0	0.0179	0	0	0	0	0	0	0	0	0	0	0.0175	0	0	0	0	0	0	0	0.0184	0	0	0	0	0	0	0	0	0.018	0	0	0	0	0	0	0
[1300] #CNPEL216-14|KR246563|BIOUG10619-A02|Ctenosciara_hyalipennis|COI-5P	CNPEL216-14	ENEA	0.0017	0.0017	0.0017	0	0	0	0	0.0175	0	0	0	0.018	0	0	0	0	0	0	0	0	0	0	0.0176	0	0	0	0	0	0	0	0.0184	0	0	0	0	0	0	0	0	0.0181	0	0	0	0	0	0	0
[1301] #CNPEL218-14|KR256020|BIOUG10619-A04|Ctenosciara_hyalipennis|COI-5P	CNPEL218-14	ENEA	0.0018	0.0018	0.0018	0	0	0	0	0.0186	0	0	0	0.0186	0	0	0	0	0	0	0	0	0	0	0.0186	0	0	0	0	0	0	0	0.0186	0	0	0	0	0	0	0	0	0.0187	0	0	0	0	0	0	0
[1302] #CNPEL224-14|KR254926|BIOUG10619-A10|Ctenosciara_hyalipennis|COI-5P	CNPEL224-14	ENEA	0.0017	0.0017	0.0017	0	0	0	0	0.0173	0	0	0	0.0176	0	0	0	0	0	0	0	0	0	0	0.0175	0	0	0	0	0	0	0	0.0184	0	0	0	0	0	0	0	0	0.0177	0	0	0	0	0	0	0
[1303] #CNPEL227-14|KR256924|BIOUG10619-B01|Ctenosciara_hyalipennis|COI-5P	CNPEL227-14	ENEA	0.0017	0.0017	0.0017	0	0	0	0	0.0176	0	0	0	0.0176	0	0	0	0	0	0	0	0	0	0	0.0179	0	0	0	0	0	0	0	0.0184	0	0	0	0	0	0	0	0	0.0177	0	0	0	0	0	0	0
[1304] #CNPEL228-14|KR250095|BIOUG10619-B02|Ctenosciara_hyalipennis|COI-5P	CNPEL228-14	ENEA	0	0	0	0.0017	0.0018	0.0017	0.0017	0.0193	0.0017	0.0017	0.0017	0.0197	0.0018	0.0017	0.0018	0.0017	0.0018	0.0018	0.0017	0.0018	0.0017	0.0017	0.0193	0.0017	0.0017	0.0017	0.0017	0.0017	0.0018	0.0017	0.0202	0.0017	0.0018	0.0017	0.0017	0.0018	0.0018	0.0017	0.0017	0.0199	0.0018	0.0017	0.0018	0.0018	0.0018	0.0017	0.0017
[1305] #CNPEL233-14|KR251919|BIOUG10619-B07|Ctenosciara_hyalipennis|COI-5P	CNPEL233-14	ENEA	0.0017	0.0017	0.0017	0	0	0	0	0.0174	0	0	0	0.0176	0	0	0	0	0	0	0	0	0	0	0.0176	0	0	0	0	0	0	0	0.0184	0	0	0	0	0	0	0	0	0.0177	0	0	0	0	0	0	0
[1306] #CNPEL240-14|KR243095|BIOUG10619-C02|Ctenosciara_hyalipennis|COI-5P	CNPEL240-14	ENEA	0.0017	0.0017	0.0017	0	0	0	0	0.0173	0	0	0	0.0176	0	0	0	0	0	0	0	0	0	0	0.0175	0	0	0	0	0	0	0	0.0184	0	0	0	0	0	0	0	0	0.0177	0	0	0	0	0	0	0
[1307] #CNPEL245-14|KR248183|BIOUG10619-C07|Ctenosciara_hyalipennis|COI-5P	CNPEL245-14	ENEA	0.0017	0.0017	0.0017	0	0	0	0	0.0173	0	0	0	0.0176	0	0	0	0	0	0	0	0	0	0	0.0175	0	0	0	0	0	0	0	0.0184	0	0	0	0	0	0	0	0	0.0177	0	0	0	0	0	0	0
[1308] #CNPEL249-14|KR238791|BIOUG10619-C11|Ctenosciara_hyalipennis|COI-5P	CNPEL249-14	ENEA	0	0	0	0.0017	0.0018	0.0017	0.0017	0.019	0.0017	0.0017	0.0017	0.0194	0.0018	0.0017	0.0018	0.0017	0.0018	0.0018	0.0017	0.0017	0.0017	0.0017	0.0193	0.0017	0.0017	0.0017	0.0017	0.0017	0.0018	0.0017	0.0202	0.0017	0.0018	0.0017	0.0017	0.0017	0.0017	0.0017	0.0017	0.0195	0.0018	0.0017	0.0018	0.0018	0.0018	0.0017	0.0017
[1309] #CNPEL250-14|KR251602|BIOUG10619-C12|Ctenosciara_hyalipennis|COI-5P	CNPEL250-14	ENEA	0.0017	0.0017	0.0017	0	0	0	0	0.0173	0	0	0	0.0176	0	0	0	0	0	0	0	0	0	0	0.0175	0	0	0	0	0	0	0	0.0184	0	0	0	0	0	0	0	0	0.0177	0	0	0	0	0	0	0
[1310] #CNPEL263-14|KR258049|BIOUG10619-E01|Ctenosciara_hyalipennis|COI-5P	CNPEL263-14	ENEA	0	0	0	0.0018	0.0018	0.0017	0.0018	0.0194	0.0017	0.0017	0.0018	0.0194	0.0018	0.0018	0.0018	0.0017	0.0018	0.0018	0.0017	0.0017	0.0018	0.0018	0.0197	0.0017	0.0017	0.0017	0.0017	0.0018	0.0018	0.0017	0.0203	0.0017	0.0018	0.0017	0.0017	0.0017	0.0017	0.0018	0.0018	0.0195	0.0018	0.0018	0.0018	0.0018	0.0018	0.0017	0.0018
[1311] #CNPEL267-14|KR243137|BIOUG10619-E05|Ctenosciara_hyalipennis|COI-5P	CNPEL267-14	ENEA	0.0018	0.0018	0.0018	0	0	0	0	0.0181	0	0	0	0.0181	0	0	0	0	0	0	0	0	0	0	0.0184	0	0	0	0	0	0	0	0.0189	0	0	0	0	0	0	0	0	0.0181	0	0	0	0	0	0	0
[1312] #CNPEL276-14|KR239377|BIOUG10619-F02|Ctenosciara_hyalipennis|COI-5P	CNPEL276-14	ENEA	0.0017	0.0017	0.0017	0	0	0	0	0.0172	0	0	0	0.0176	0	0	0	0	0	0	0	0	0	0	0.0175	0	0	0	0	0	0	0	0.0184	0	0	0	0	0	0	0	0	0.0177	0	0	0	0	0	0	0
[1313] #CNPEL286-14|KR239890|BIOUG10619-F12|Ctenosciara_hyalipennis|COI-5P	CNPEL286-14	ENEA	0.0017	0.0017	0.0017	0	0	0	0	0.0173	0	0	0	0.0176	0	0	0	0	0	0	0	0	0	0	0.0175	0	0	0	0	0	0	0	0.0184	0	0	0	0	0	0	0	0	0.0177	0	0	0	0	0	0	0
[1314] #CNPEL311-14|KR255138|BIOUG10620-A02|Ctenosciara_hyalipennis|COI-5P	CNPEL311-14	ENEA	0.0017	0.0017	0.0017	0	0	0	0	0.0173	0	0	0	0.0176	0	0	0	0	0	0	0	0	0	0	0.0175	0	0	0	0	0	0	0	0.0184	0	0	0	0	0	0	0	0	0.0177	0	0	0	0	0	0	0
[1315] #CNPEL315-14|KR237114|BIOUG10620-A06|Ctenosciara_hyalipennis|COI-5P	CNPEL315-14	ENEA	0.0017	0.0017	0.0017	0	0	0	0	0.0173	0	0	0	0.0176	0	0	0	0	0	0	0	0	0	0	0.0175	0	0	0	0	0	0	0	0.0184	0	0	0	0	0	0	0	0	0.0177	0	0	0	0	0	0	0
[1316] #CNPEL317-14|KR248960|BIOUG10620-A08|Ctenosciara_hyalipennis|COI-5P	CNPEL317-14	ENEA	0	0	0	0.0018	0.0019	0.0018	0.0019	0.0203	0.0018	0.0018	0.0018	0.0203	0.0019	0.0018	0.0018	0.0018	0.0018	0.0019	0.0018	0.0018	0.0018	0.0018	0.0206	0.0018	0.0018	0.0018	0.0018	0.0018	0.0019	0.0018	0.0212	0.0018	0.0019	0.0018	0.0018	0.0018	0.0018	0.0019	0.0018	0.0203	0.0019	0.0019	0.0018	0.0019	0.0019	0.0018	0.0018
[1317] #CNPEL319-14|KR250317|BIOUG10620-A10|Ctenosciara_hyalipennis|COI-5P	CNPEL319-14	ENEA	0.0017	0.0017	0.0017	0	0	0	0	0.0173	0	0	0	0.0176	0	0	0	0	0	0	0	0	0	0	0.0175	0	0	0	0	0	0	0	0.0184	0	0	0	0	0	0	0	0	0.0177	0	0	0	0	0	0	0
[1318] #CNPEL320-14|KR247022|BIOUG10620-A11|Ctenosciara_hyalipennis|COI-5P	CNPEL320-14	ENEA	0.0017	0.0017	0.0017	0	0	0	0	0.0173	0	0	0	0.0176	0	0	0	0	0	0	0	0	0	0	0.0175	0	0	0	0	0	0	0	0.0184	0	0	0	0	0	0	0	0	0.0177	0	0	0	0	0	0	0
[1319] #CNPEL322-14|KR241714|BIOUG10620-B01|Ctenosciara_hyalipennis|COI-5P	CNPEL322-14	ENEA	0.0018	0.0018	0.0018	0	0	0	0	0.0179	0	0	0	0.0179	0	0	0	0	0	0	0	0	0	0	0.0179	0	0	0	0	0	0	0	0.0184	0	0	0	0	0	0	0	0	0.018	0	0	0	0	0	0	0
[1320] #CNPEL329-14|KR254375|BIOUG10620-B08|Ctenosciara_hyalipennis|COI-5P	CNPEL329-14	ENEA	0.0017	0.0017	0.0017	0	0	0	0	0.0176	0	0	0	0.0176	0	0	0	0	0	0	0	0	0	0	0.0179	0	0	0	0	0	0	0	0.0184	0	0	0	0	0	0	0	0	0.0177	0	0	0	0	0	0	0
[1321] #CNPEL337-14|KR246052|BIOUG10620-C04|Ctenosciara_hyalipennis|COI-5P	CNPEL337-14	ENEA	0.0018	0.0018	0.0018	0	0	0	0	0.0184	0	0	0	0.0184	0	0	0	0	0	0	0	0	0	0	0.0187	0	0	0	0	0	0	0	0.0193	0	0	0	0	0	0	0	0	0.0184	0	0	0	0	0	0	0
[1322] #CNPEL341-14|KR241006|BIOUG10620-C08|Ctenosciara_hyalipennis|COI-5P	CNPEL341-14	ENEA	0.0018	0.0018	0.0018	0	0	0	0	0.018	0	0	0	0.018	0	0	0	0	0	0	0	0	0	0	0.0183	0	0	0	0	0	0	0	0.0188	0	0	0	0	0	0	0	0	0.018	0	0	0	0	0	0	0
[1323] #CNPEL345-14|KR235693|BIOUG10620-C12|Ctenosciara_hyalipennis|COI-5P	CNPEL345-14	ENEA	0.0018	0.0018	0.0018	0	0	0	0	0.0183	0	0	0	0.0183	0	0	0	0	0	0	0	0	0	0	0.0186	0	0	0	0	0	0	0	0.0192	0	0	0	0	0	0	0	0	0.0183	0	0	0	0	0	0	0
[1324] #CNPEL367-14|KR246984|BIOUG10620-E10|Ctenosciara_hyalipennis|COI-5P	CNPEL367-14	ENEA	0.0017	0.0017	0.0017	0	0	0	0	0.0176	0	0	0	0.0176	0	0	0	0	0	0	0	0	0	0	0.0179	0	0	0	0	0	0	0	0.0184	0	0	0	0	0	0	0	0	0.0177	0	0	0	0	0	0	0
[1325] #CNPEL368-14|KR251197|BIOUG10620-E11|Ctenosciara_hyalipennis|COI-5P	CNPEL368-14	ENEA	0.0018	0.0018	0.0018	0	0	0	0	0.0181	0	0	0	0.0181	0	0	0	0	0	0	0	0	0	0	0.0184	0	0	0	0	0	0	0	0.0189	0	0	0	0	0	0	0	0	0.0181	0	0	0	0	0	0	0
[1326] #CNPEL375-14|KR238751|BIOUG10620-F06|Ctenosciara_hyalipennis|COI-5P	CNPEL375-14	ENEA	0.0017	0.0017	0.0017	0	0	0	0	0.0173	0	0	0	0.0176	0	0	0	0	0	0	0	0	0	0	0.0175	0	0	0	0	0	0	0	0.0184	0	0	0	0	0	0	0	0	0.0177	0	0	0	0	0	0	0
[1327] #CNPEL376-14|KR240826|BIOUG10620-F07|Ctenosciara_hyalipennis|COI-5P	CNPEL376-14	ENEA	0.0018	0.0018	0.0018	0	0	0	0	0.0179	0	0	0	0.0179	0	0	0	0	0	0	0	0	0	0	0.0179	0	0	0	0	0	0	0	0.0184	0	0	0	0	0	0	0	0	0.018	0	0	0	0	0	0	0
[1328] #CNPEL384-14|KR241697|BIOUG10620-G03|Ctenosciara_hyalipennis|COI-5P	CNPEL384-14	ENEA	0.0017	0.0017	0.0017	0	0	0	0	0.0176	0	0	0	0.018	0	0	0	0	0	0	0	0	0	0	0.0176	0	0	0	0	0	0	0	0.0184	0	0	0	0	0	0	0	0	0.0181	0	0	0	0	0	0	0
[1329] #CNPEL385-14|KR235058|BIOUG10620-G04|Ctenosciara_hyalipennis|COI-5P	CNPEL385-14	ENEA	0.0017	0.0017	0.0017	0	0	0	0	0.0172	0	0	0	0.0176	0	0	0	0	0	0	0	0	0	0	0.0175	0	0	0	0	0	0	0	0.0184	0	0	0	0	0	0	0	0	0.0177	0	0	0	0	0	0	0
[1330] #CNPEL392-14|KR235959|BIOUG10620-G11|Ctenosciara_hyalipennis|COI-5P	CNPEL392-14	ENEA	0.0017	0.0017	0.0017	0	0	0	0	0.0176	0	0	0	0.0176	0	0	0	0	0	0	0	0	0	0	0.0179	0	0	0	0	0	0	0	0.0184	0	0	0	0	0	0	0	0	0.0177	0	0	0	0	0	0	0
[1331] #CNPEL394-14|KR255916|BIOUG10620-H01|Ctenosciara_hyalipennis|COI-5P	CNPEL394-14	ENEA	0	0	0	0.0017	0.0018	0.0017	0.0017	0.0191	0.0017	0.0017	0.0017	0.0194	0.0018	0.0017	0.0018	0.0017	0.0018	0.0018	0.0017	0.0017	0.0017	0.0017	0.0194	0.0017	0.0017	0.0017	0.0017	0.0017	0.0018	0.0017	0.0202	0.0017	0.0018	0.0017	0.0017	0.0017	0.0017	0.0017	0.0017	0.0195	0.0018	0.0018	0.0018	0.0018	0.0018	0.0017	0.0017
[1332] #CNPEL401-14|KR238884|BIOUG10620-H08|Ctenosciara_hyalipennis|COI-5P	CNPEL401-14	ENEA	0.0017	0.0017	0.0017	0	0	0	0	0.0172	0	0	0	0.0176	0	0	0	0	0	0	0	0	0	0	0.0175	0	0	0	0	0	0	0	0.0184	0	0	0	0	0	0	0	0	0.0177	0	0	0	0	0	0	0
[1333] #CNPEL412-14|KR249309|BIOUG10621-A08|Ctenosciara_hyalipennis|COI-5P	CNPEL412-14	ENEA	0.0017	0.0017	0.0017	0	0	0	0	0.0173	0	0	0	0.0176	0	0	0	0	0	0	0	0	0	0	0.0175	0	0	0	0	0	0	0	0.0184	0	0	0	0	0	0	0	0	0.0177	0	0	0	0	0	0	0
[1334] #CNPEL419-14|KR245797|BIOUG10621-B03|Ctenosciara_hyalipennis|COI-5P	CNPEL419-14	ENEA	0.0017	0.0017	0.0017	0	0	0	0	0.0175	0	0	0	0.0179	0	0	0	0	0	0	0	0	0	0	0.0175	0	0	0	0	0	0	0	0.0184	0	0	0	0	0	0	0	0	0.018	0	0	0	0	0	0	0
[1335] #CNPEL423-14|KR250511|BIOUG10621-B07|Ctenosciara_hyalipennis|COI-5P	CNPEL423-14	ENEA	0.0017	0.0017	0.0017	0	0	0	0	0.0173	0	0	0	0.0176	0	0	0	0	0	0	0	0	0	0	0.0175	0	0	0	0	0	0	0	0.0184	0	0	0	0	0	0	0	0	0.0177	0	0	0	0	0	0	0
[1336] #CNPEL432-14|KR235562|BIOUG10621-C04|Ctenosciara_hyalipennis|COI-5P	CNPEL432-14	ENEA	0.0017	0.0017	0.0017	0	0	0	0	0.0175	0	0	0	0.0179	0	0	0	0	0	0	0	0	0	0	0.0175	0	0	0	0	0	0	0	0.0184	0	0	0	0	0	0	0	0	0.018	0	0	0	0	0	0	0
[1337] #CNPEL437-14|KR243342|BIOUG10621-C09|Ctenosciara_hyalipennis|COI-5P	CNPEL437-14	ENEA	0.0017	0.0017	0.0017	0	0	0	0	0.0175	0	0	0	0.0179	0	0	0	0	0	0	0	0	0	0	0.0175	0	0	0	0	0	0	0	0.0184	0	0	0	0	0	0	0	0	0.018	0	0	0	0	0	0	0
[1338] #CNPEL440-14|KR257770|BIOUG10621-C12|Ctenosciara_hyalipennis|COI-5P	CNPEL440-14	ENEA	0.0017	0.0017	0.0017	0	0	0	0	0.0175	0	0	0	0.0179	0	0	0	0	0	0	0	0	0	0	0.0175	0	0	0	0	0	0	0	0.0184	0	0	0	0	0	0	0	0	0.018	0	0	0	0	0	0	0
[1339] #CNPEL462-14|KR257854|BIOUG10621-E10|Ctenosciara_hyalipennis|COI-5P	CNPEL462-14	ENEA	0.0017	0.0017	0.0017	0	0	0	0	0.0173	0	0	0	0.0176	0	0	0	0	0	0	0	0	0	0	0.0175	0	0	0	0	0	0	0	0.0184	0	0	0	0	0	0	0	0	0.0177	0	0	0	0	0	0	0
[1340] #CNPEL466-14|KR249971|BIOUG10621-F02|Ctenosciara_hyalipennis|COI-5P	CNPEL466-14	ENEA	0.0017	0.0017	0.0017	0	0	0	0	0.0173	0	0	0	0.0176	0	0	0	0	0	0	0	0	0	0	0.0175	0	0	0	0	0	0	0	0.0184	0	0	0	0	0	0	0	0	0.0177	0	0	0	0	0	0	0
[1341] #CNPEL470-14|KR254156|BIOUG10621-F06|Ctenosciara_hyalipennis|COI-5P	CNPEL470-14	ENEA	0.0017	0.0017	0.0017	0	0	0	0	0.0176	0	0	0	0.0176	0	0	0	0	0	0	0	0	0	0	0.0179	0	0	0	0	0	0	0	0.0184	0	0	0	0	0	0	0	0	0.0177	0	0	0	0	0	0	0
[1342] #CNPEL471-14|KR250442|BIOUG10621-F07|Ctenosciara_hyalipennis|COI-5P	CNPEL471-14	ENEA	0.0018	0.0018	0.0018	0	0	0	0	0.0167	0	0	0	0.0167	0	0	0	0	0	0	0	0	0	0	0.017	0	0	0	0	0	0	0	0.0175	0	0	0	0	0	0	0	0	0.0167	0	0	0	0	0	0	0
[1343] #CNPEL475-14|KR257029|BIOUG10621-F11|Ctenosciara_hyalipennis|COI-5P	CNPEL475-14	ENEA	0.0017	0.0017	0.0017	0	0	0	0	0.0175	0	0	0	0.0179	0	0	0	0	0	0	0	0	0	0	0.0175	0	0	0	0	0	0	0	0.0184	0	0	0	0	0	0	0	0	0.018	0	0	0	0	0	0	0
[1344] #CNPEL477-14|KR256145|BIOUG10621-G01|Ctenosciara_hyalipennis|COI-5P	CNPEL477-14	ENEA	0	0	0	0.0018	0.0018	0.0017	0.0018	0.0194	0.0017	0.0017	0.0018	0.0194	0.0018	0.0018	0.0018	0.0017	0.0018	0.0018	0.0017	0.0017	0.0018	0.0018	0.0197	0.0017	0.0017	0.0017	0.0017	0.0018	0.0018	0.0017	0.0203	0.0017	0.0018	0.0017	0.0017	0.0017	0.0017	0.0018	0.0018	0.0195	0.0018	0.0018	0.0018	0.0018	0.0018	0.0017	0.0018
[1345] #CNPEL484-14|KR239000|BIOUG10621-G08|Ctenosciara_hyalipennis|COI-5P	CNPEL484-14	ENEA	0.0017	0.0017	0.0017	0	0	0	0	0.0176	0	0	0	0.0176	0	0	0	0	0	0	0	0	0	0	0.0179	0	0	0	0	0	0	0	0.0184	0	0	0	0	0	0	0	0	0.0177	0	0	0	0	0	0	0
[1346] #CNPEL490-14|KR244987|BIOUG10621-H02|Ctenosciara_hyalipennis|COI-5P	CNPEL490-14	ENEA	0.0017	0.0017	0.0017	0	0	0	0	0.0173	0	0	0	0.0176	0	0	0	0	0	0	0	0	0	0	0.0175	0	0	0	0	0	0	0	0.0184	0	0	0	0	0	0	0	0	0.0177	0	0	0	0	0	0	0
[1347] #CNPEL493-14|KR237542|BIOUG10621-H05|Ctenosciara_hyalipennis|COI-5P	CNPEL493-14	ENEA	0.0017	0.0017	0.0017	0	0	0	0	0.0176	0	0	0	0.0176	0	0	0	0	0	0	0	0	0	0	0.0179	0	0	0	0	0	0	0	0.0184	0	0	0	0	0	0	0	0	0.0177	0	0	0	0	0	0	0
[1348] #CNPEL499-14|KR245943|BIOUG10621-H11|Ctenosciara_hyalipennis|COI-5P	CNPEL499-14	ENEA	0	0	0	0.0018	0.0018	0.0017	0.0018	0.0194	0.0017	0.0017	0.0018	0.0194	0.0018	0.0018	0.0018	0.0017	0.0018	0.0018	0.0017	0.0017	0.0018	0.0018	0.0197	0.0017	0.0017	0.0017	0.0017	0.0018	0.0018	0.0017	0.0203	0.0017	0.0018	0.0017	0.0017	0.0017	0.0017	0.0018	0.0018	0.0195	0.0018	0.0018	0.0018	0.0018	0.0018	0.0017	0.0018
[1349] #CNPEL500-14|KR246346|BIOUG10622-A01|Ctenosciara_hyalipennis|COI-5P	CNPEL500-14	ENEA	0.0018	0.0018	0.0018	0	0	0	0	0.0179	0	0	0	0.0179	0	0	0	0	0	0	0	0	0	0	0.0179	0	0	0	0	0	0	0	0.0184	0	0	0	0	0	0	0	0	0.018	0	0	0	0	0	0	0
[1350] #CNPEL505-14|KR247400|BIOUG10622-A06|Ctenosciara_hyalipennis|COI-5P	CNPEL505-14	ENEA	0.0019	0.0019	0.0019	0	0	0	0	0.0169	0	0	0	0.0172	0	0	0	0	0	0	0	0	0	0	0.0169	0	0	0	0	0	0	0	0.0172	0	0	0	0	0	0	0	0	0.0174	0	0	0	0	0	0	0
[1351] #CNPEL519-14|KR246198|BIOUG10622-B08|Ctenosciara_hyalipennis|COI-5P	CNPEL519-14	ENEA	0.0034	0.0034	0.0034	0.0017	0.0018	0.0017	0.0017	0.019	0.0017	0.0017	0.0017	0.0194	0.0018	0.0017	0.0018	0.0017	0.0018	0.0018	0.0017	0.0017	0.0017	0.0017	0.0193	0.0017	0.0017	0.0017	0.0017	0.0017	0.0018	0.0017	0.0202	0.0017	0.0018	0.0017	0.0017	0.0017	0.0017	0.0017	0.0017	0.0195	0.0018	0.0017	0.0018	0.0018	0.0018	0.0017	0.0017
[1352] #CNPEL520-14|KR257664|BIOUG10622-B09|Ctenosciara_hyalipennis|COI-5P	CNPEL520-14	ENEA	0	0	0	0.0018	0.0018	0.0017	0.0018	0.0194	0.0017	0.0017	0.0018	0.0194	0.0018	0.0018	0.0018	0.0017	0.0018	0.0018	0.0017	0.0017	0.0018	0.0018	0.0197	0.0017	0.0017	0.0017	0.0017	0.0018	0.0018	0.0017	0.0203	0.0017	0.0018	0.0017	0.0017	0.0017	0.0017	0.0018	0.0018	0.0195	0.0018	0.0018	0.0018	0.0018	0.0018	0.0017	0.0018
[1353] #CNPEL527-14|KR247981|BIOUG10622-C04|Ctenosciara_hyalipennis|COI-5P	CNPEL527-14	ENEA	0.0017	0.0017	0.0017	0	0	0	0	0.0172	0	0	0	0.0175	0	0	0	0	0	0	0	0	0	0	0.0175	0	0	0	0	0	0	0	0.0184	0	0	0	0	0	0	0	0	0.0177	0	0	0	0	0	0	0
[1354] #CNPEL537-14|KR237599|BIOUG10622-D02|Ctenosciara_hyalipennis|COI-5P	CNPEL537-14	ENEA	0.0017	0.0017	0.0017	0	0	0	0	0.0175	0	0	0	0.0179	0	0	0	0	0	0	0	0	0	0	0.0175	0	0	0	0	0	0	0	0.0184	0	0	0	0	0	0	0	0	0.018	0	0	0	0	0	0	0
[1355] #CNPEL545-14|KR241998|BIOUG10622-D10|Ctenosciara_hyalipennis|COI-5P	CNPEL545-14	ENEA	0.0017	0.0017	0.0017	0	0	0	0	0.0176	0	0	0	0.0176	0	0	0	0	0	0	0	0	0	0	0.0179	0	0	0	0	0	0	0	0.0184	0	0	0	0	0	0	0	0	0.0177	0	0	0	0	0	0	0
[1356] #CNPEL547-14|KR247924|BIOUG10622-D12|Ctenosciara_hyalipennis|COI-5P	CNPEL547-14	ENEA	0.0018	0.0018	0.0018	0	0	0	0	0.0186	0	0	0	0.0186	0	0	0	0	0	0	0	0	0	0	0.0186	0	0	0	0	0	0	0	0.0186	0	0	0	0	0	0	0	0	0.0187	0	0	0	0	0	0	0
[1357] #CNPEL553-14|KR234152|BIOUG10622-E06|Ctenosciara_hyalipennis|COI-5P	CNPEL553-14	ENEA	0	0	0	0.0017	0.0018	0.0017	0.0017	0.019	0.0017	0.0017	0.0017	0.0194	0.0018	0.0017	0.0018	0.0017	0.0018	0.0018	0.0017	0.0017	0.0017	0.0017	0.0193	0.0017	0.0017	0.0017	0.0017	0.0017	0.0018	0.0017	0.0202	0.0017	0.0018	0.0017	0.0017	0.0017	0.0017	0.0017	0.0017	0.0195	0.0018	0.0017	0.0018	0.0018	0.0018	0.0017	0.0017
[1358] #CNPEL554-14|KR240216|BIOUG10622-E07|Ctenosciara_hyalipennis|COI-5P	CNPEL554-14	ENEA	0.0018	0.0018	0.0018	0	0	0	0	0.0179	0	0	0	0.0179	0	0	0	0	0	0	0	0	0	0	0.0179	0	0	0	0	0	0	0	0.0184	0	0	0	0	0	0	0	0	0.018	0	0	0	0	0	0	0
[1359] #CNPEL559-14|KR235474|BIOUG10622-E12|Ctenosciara_hyalipennis|COI-5P	CNPEL559-14	ENEA	0	0	0	0.0018	0.0019	0.0018	0.0018	0.0199	0.0018	0.0018	0.0018	0.0199	0.0019	0.0018	0.0018	0.0018	0.0018	0.0019	0.0018	0.0018	0.0018	0.0018	0.0201	0.0018	0.0018	0.0018	0.0018	0.0018	0.0019	0.0018	0.0208	0.0018	0.0019	0.0018	0.0018	0.0018	0.0018	0.0018	0.0018	0.0199	0.0019	0.0018	0.0018	0.0019	0.0019	0.0018	0.0018
[1360] #CNPEL565-14|KR236564|BIOUG10622-F06|Ctenosciara_hyalipennis|COI-5P	CNPEL565-14	ENEA	0.0018	0.0018	0.0018	0	0	0	0	0.0179	0	0	0	0.0179	0	0	0	0	0	0	0	0	0	0	0.0179	0	0	0	0	0	0	0	0.0184	0	0	0	0	0	0	0	0	0.018	0	0	0	0	0	0	0
[1361] #CNPEL575-14|KR243906|BIOUG10622-G04|Ctenosciara_hyalipennis|COI-5P	CNPEL575-14	ENEA	0	0	0	0.0018	0.0018	0.0017	0.0018	0.0194	0.0017	0.0017	0.0018	0.0194	0.0018	0.0018	0.0018	0.0017	0.0018	0.0018	0.0017	0.0017	0.0018	0.0018	0.0197	0.0017	0.0017	0.0017	0.0017	0.0018	0.0018	0.0017	0.0203	0.0017	0.0018	0.0017	0.0017	0.0017	0.0017	0.0018	0.0018	0.0195	0.0018	0.0018	0.0018	0.0018	0.0018	0.0017	0.0018
[1362] #CNPEL576-14|KR242580|BIOUG10622-G05|Ctenosciara_hyalipennis|COI-5P	CNPEL576-14	ENEA	0.0017	0.0017	0.0017	0	0	0	0	0.0176	0	0	0	0.018	0	0	0	0	0	0	0	0	0	0	0.0176	0	0	0	0	0	0	0	0.0184	0	0	0	0	0	0	0	0	0.0181	0	0	0	0	0	0	0
[1363] #CNPEL586-14|KR247952|BIOUG10622-H03|Ctenosciara_hyalipennis|COI-5P	CNPEL586-14	ENEA	0.0018	0.0018	0.0018	0	0	0	0	0.0181	0	0	0	0.0186	0	0	0	0	0	0	0	0	0	0	0.0182	0	0	0	0	0	0	0	0.0186	0	0	0	0	0	0	0	0	0.0187	0	0	0	0	0	0	0
[1364] #CNPEL596-14|KR251362|BIOUG10623-A02|Ctenosciara_hyalipennis|COI-5P	CNPEL596-14	ENEA	0.0017	0.0017	0.0017	0	0	0	0	0.0173	0	0	0	0.0176	0	0	0	0	0	0	0	0	0	0	0.0175	0	0	0	0	0	0	0	0.0184	0	0	0	0	0	0	0	0	0.0177	0	0	0	0	0	0	0
[1365] #CNPEL601-14|KR248277|BIOUG10623-A07|Ctenosciara_hyalipennis|COI-5P	CNPEL601-14	ENEA	0	0	0	0.0017	0.0018	0.0017	0.0017	0.019	0.0017	0.0017	0.0017	0.0194	0.0018	0.0017	0.0018	0.0017	0.0018	0.0018	0.0017	0.0017	0.0017	0.0017	0.0193	0.0017	0.0017	0.0017	0.0017	0.0017	0.0018	0.0017	0.0202	0.0017	0.0018	0.0017	0.0017	0.0017	0.0017	0.0017	0.0017	0.0195	0.0018	0.0017	0.0018	0.0018	0.0018	0.0017	0.0017
[1366] #CNPEL607-14|KR235555|BIOUG10623-B01|Ctenosciara_hyalipennis|COI-5P	CNPEL607-14	ENEA	0.0017	0.0017	0.0017	0	0	0	0	0.0173	0	0	0	0.0176	0	0	0	0	0	0	0	0	0	0	0.0175	0	0	0	0	0	0	0	0.0184	0	0	0	0	0	0	0	0	0.0177	0	0	0	0	0	0	0
[1367] #CNPEL611-14|KR258296|BIOUG10623-B05|Ctenosciara_hyalipennis|COI-5P	CNPEL611-14	ENEA	0.0017	0.0017	0.0017	0	0	0	0	0.0173	0	0	0	0.0176	0	0	0	0	0	0	0	0	0	0	0.0175	0	0	0	0	0	0	0	0.0184	0	0	0	0	0	0	0	0	0.0177	0	0	0	0	0	0	0
[1368] #CNPEL619-14|KR253809|BIOUG10623-C01|Ctenosciara_hyalipennis|COI-5P	CNPEL619-14	ENEA	0.0017	0.0017	0.0017	0	0	0	0	0.0173	0	0	0	0.0176	0	0	0	0	0	0	0	0	0	0	0.0175	0	0	0	0	0	0	0	0.0184	0	0	0	0	0	0	0	0	0.0177	0	0	0	0	0	0	0
[1369] #CNPEL627-14|KR253787|BIOUG10623-C09|Ctenosciara_hyalipennis|COI-5P	CNPEL627-14	ENEA	0.0017	0.0017	0.0017	0	0	0	0	0.0172	0	0	0	0.0175	0	0	0	0	0	0	0	0	0	0	0.0175	0	0	0	0	0	0	0	0.0184	0	0	0	0	0	0	0	0	0.0177	0	0	0	0	0	0	0
[1370] #CNPEL631-14|KR249133|BIOUG10623-D01|Ctenosciara_hyalipennis|COI-5P	CNPEL631-14	ENEA	0.0017	0.0017	0.0017	0	0	0	0	0.0175	0	0	0	0.0179	0	0	0	0	0	0	0	0	0	0	0.0175	0	0	0	0	0	0	0	0.0184	0	0	0	0	0	0	0	0	0.018	0	0	0	0	0	0	0
[1371] #CNPEL637-14|KR247949|BIOUG10623-D07|Ctenosciara_hyalipennis|COI-5P	CNPEL637-14	ENEA	0	0	0	0.0018	0.0019	0.0018	0.0019	0.0203	0.0018	0.0018	0.0018	0.0203	0.0019	0.0018	0.0018	0.0018	0.0018	0.0019	0.0018	0.0018	0.0018	0.0018	0.0206	0.0018	0.0018	0.0018	0.0018	0.0018	0.0019	0.0018	0.0212	0.0018	0.0019	0.0018	0.0018	0.0018	0.0018	0.0019	0.0018	0.0203	0.0019	0.0019	0.0018	0.0019	0.0019	0.0018	0.0018
[1372] #CNPEL641-14|KR257225|BIOUG10623-D11|Ctenosciara_hyalipennis|COI-5P	CNPEL641-14	ENEA	0.0017	0.0017	0.0017	0	0	0	0	0.0172	0	0	0	0.0176	0	0	0	0	0	0	0	0	0	0	0.0175	0	0	0	0	0	0	0	0.0184	0	0	0	0	0	0	0	0	0.0177	0	0	0	0	0	0	0
[1373] #CNPEL647-14|KR251144|BIOUG10623-E05|Ctenosciara_hyalipennis|COI-5P	CNPEL647-14	ENEA	0	0	0	0.0017	0.0018	0.0017	0.0017	0.019	0.0017	0.0017	0.0017	0.0194	0.0018	0.0017	0.0018	0.0017	0.0018	0.0018	0.0017	0.0017	0.0017	0.0017	0.0193	0.0017	0.0017	0.0017	0.0017	0.0017	0.0018	0.0017	0.0202	0.0017	0.0018	0.0017	0.0017	0.0017	0.0017	0.0017	0.0017	0.0195	0.0018	0.0017	0.0018	0.0018	0.0018	0.0017	0.0017
[1374] #CNPEL652-14|KR242287|BIOUG10623-E10|Ctenosciara_hyalipennis|COI-5P	CNPEL652-14	ENEA	0.0017	0.0017	0.0017	0	0	0	0	0.0173	0	0	0	0.0176	0	0	0	0	0	0	0	0	0	0	0.0175	0	0	0	0	0	0	0	0.0184	0	0	0	0	0	0	0	0	0.0177	0	0	0	0	0	0	0
[1375] #CNPEL659-14|KR253225|BIOUG10623-F05|Ctenosciara_hyalipennis|COI-5P	CNPEL659-14	ENEA	0.0018	0.0018	0.0018	0	0	0	0	0.018	0	0	0	0.018	0	0	0	0	0	0	0	0	0	0	0.0183	0	0	0	0	0	0	0	0.0188	0	0	0	0	0	0	0	0	0.018	0	0	0	0	0	0	0
[1376] #CNPEL666-14|KR252218|BIOUG10623-F12|Ctenosciara_hyalipennis|COI-5P	CNPEL666-14	ENEA	0	0	0	0.0017	0.0018	0.0017	0.0017	0.0192	0.0017	0.0017	0.0017	0.0197	0.0018	0.0017	0.0018	0.0017	0.0018	0.0018	0.0017	0.0018	0.0017	0.0017	0.0193	0.0017	0.0017	0.0017	0.0017	0.0017	0.0018	0.0017	0.0202	0.0017	0.0018	0.0017	0.0017	0.0018	0.0018	0.0017	0.0017	0.0199	0.0018	0.0017	0.0018	0.0018	0.0018	0.0017	0.0017
[1377] #CNPEL672-14|KR251716|BIOUG10623-G06|Ctenosciara_hyalipennis|COI-5P	CNPEL672-14	ENEA	0.0017	0.0017	0.0017	0	0	0	0	0.0173	0	0	0	0.0176	0	0	0	0	0	0	0	0	0	0	0.0175	0	0	0	0	0	0	0	0.0184	0	0	0	0	0	0	0	0	0.0177	0	0	0	0	0	0	0
[1378] #CNPEL687-14|KR250443|BIOUG10623-H09|Ctenosciara_hyalipennis|COI-5P	CNPEL687-14	ENEA	0.0017	0.0017	0.0017	0	0	0	0	0.0173	0	0	0	0.0176	0	0	0	0	0	0	0	0	0	0	0.0175	0	0	0	0	0	0	0	0.0184	0	0	0	0	0	0	0	0	0.0177	0	0	0	0	0	0	0
[1379] #CNPEL699-14|KR234575|BIOUG10624-A10|Ctenosciara_hyalipennis|COI-5P	CNPEL699-14	ENEA	0.0017	0.0017	0.0017	0	0	0	0	0.0173	0	0	0	0.0175	0	0	0	0	0	0	0	0	0	0	0.0175	0	0	0	0	0	0	0	0.0184	0	0	0	0	0	0	0	0	0.0177	0	0	0	0	0	0	0
[1380] #CNPEL700-14|KR251221|BIOUG10624-A11|Ctenosciara_hyalipennis|COI-5P	CNPEL700-14	ENEA	0.0017	0.0017	0.0017	0	0	0	0	0.0174	0	0	0	0.0178	0	0	0	0	0	0	0	0	0	0	0.0175	0	0	0	0	0	0	0	0.0184	0	0	0	0	0	0	0	0	0.018	0	0	0	0	0	0	0
[1381] #CNPEL701-14|KR239757|BIOUG10624-A12|Ctenosciara_hyalipennis|COI-5P	CNPEL701-14	ENEA	0.0017	0.0017	0.0017	0	0	0	0	0.0172	0	0	0	0.0175	0	0	0	0	0	0	0	0	0	0	0.0175	0	0	0	0	0	0	0	0.0184	0	0	0	0	0	0	0	0	0.0177	0	0	0	0	0	0	0
[1382] #CNPEL706-14|KR243515|BIOUG10624-B05|Ctenosciara_hyalipennis|COI-5P	CNPEL706-14	ENEA	0.0017	0.0017	0.0017	0	0	0	0	0.0172	0	0	0	0.0175	0	0	0	0	0	0	0	0	0	0	0.0175	0	0	0	0	0	0	0	0.0184	0	0	0	0	0	0	0	0	0.0177	0	0	0	0	0	0	0
[1383] #CNPEL716-14|KR252312|BIOUG10624-C03|Ctenosciara_hyalipennis|COI-5P	CNPEL716-14	ENEA	0.0017	0.0017	0.0017	0	0	0	0	0.0172	0	0	0	0.0175	0	0	0	0	0	0	0	0	0	0	0.0175	0	0	0	0	0	0	0	0.0184	0	0	0	0	0	0	0	0	0.0177	0	0	0	0	0	0	0
[1384] #CNPEL719-14|KR249498|BIOUG10624-C06|Ctenosciara_hyalipennis|COI-5P	CNPEL719-14	ENEA	0.0017	0.0017	0.0017	0	0	0	0	0.0172	0	0	0	0.0175	0	0	0	0	0	0	0	0	0	0	0.0175	0	0	0	0	0	0	0	0.0184	0	0	0	0	0	0	0	0	0.0177	0	0	0	0	0	0	0
[1385] #CNPEL721-14|KR240599|BIOUG10624-C08|Ctenosciara_hyalipennis|COI-5P	CNPEL721-14	ENEA	0.0017	0.0017	0.0017	0	0	0	0	0.0172	0	0	0	0.0175	0	0	0	0	0	0	0	0	0	0	0.0175	0	0	0	0	0	0	0	0.0184	0	0	0	0	0	0	0	0	0.0177	0	0	0	0	0	0	0
[1386] #CNPEL725-14|KR256328|BIOUG10624-C12|Ctenosciara_hyalipennis|COI-5P	CNPEL725-14	ENEA	0	0	0	0.0017	0.0018	0.0017	0.0017	0.0192	0.0017	0.0017	0.0017	0.0196	0.0018	0.0017	0.0018	0.0017	0.0018	0.0018	0.0017	0.0018	0.0017	0.0017	0.0193	0.0017	0.0017	0.0017	0.0017	0.0017	0.0018	0.0017	0.0202	0.0017	0.0018	0.0017	0.0017	0.0018	0.0018	0.0017	0.0017	0.0198	0.0018	0.0017	0.0018	0.0018	0.0018	0.0017	0.0017
[1387] #CNPEL726-14|KR250437|BIOUG10624-D01|Ctenosciara_hyalipennis|COI-5P	CNPEL726-14	ENEA	0.0017	0.0017	0.0017	0	0	0	0	0.0175	0	0	0	0.0178	0	0	0	0	0	0	0	0	0	0	0.0175	0	0	0	0	0	0	0	0.0184	0	0	0	0	0	0	0	0	0.018	0	0	0	0	0	0	0
[1388] #CNPEL729-14|KR250731|BIOUG10624-D04|Ctenosciara_hyalipennis|COI-5P	CNPEL729-14	ENEA	0.0017	0.0017	0.0017	0	0	0	0	0.0172	0	0	0	0.0175	0	0	0	0	0	0	0	0	0	0	0.0175	0	0	0	0	0	0	0	0.0184	0	0	0	0	0	0	0	0	0.0177	0	0	0	0	0	0	0
[1389] #CNPEL738-14|KR253725|BIOUG10624-E01|Ctenosciara_hyalipennis|COI-5P	CNPEL738-14	ENEA	0.0017	0.0017	0.0017	0	0	0	0	0.0175	0	0	0	0.0175	0	0	0	0	0	0	0	0	0	0	0.0178	0	0	0	0	0	0	0	0.0184	0	0	0	0	0	0	0	0	0.0177	0	0	0	0	0	0	0
[1390] #CNPEL745-14|KR238072|BIOUG10624-E08|Ctenosciara_hyalipennis|COI-5P	CNPEL745-14	ENEA	0.0017	0.0017	0.0017	0	0	0	0	0.0175	0	0	0	0.0178	0	0	0	0	0	0	0	0	0	0	0.0175	0	0	0	0	0	0	0	0.0184	0	0	0	0	0	0	0	0	0.018	0	0	0	0	0	0	0
[1391] #CNPEL747-14|KR234228|BIOUG10624-E10|Ctenosciara_hyalipennis|COI-5P	CNPEL747-14	ENEA	0.0017	0.0017	0.0017	0	0	0	0	0.0172	0	0	0	0.0175	0	0	0	0	0	0	0	0	0	0	0.0175	0	0	0	0	0	0	0	0.0184	0	0	0	0	0	0	0	0	0.0177	0	0	0	0	0	0	0
[1392] #CNPEL751-14|KR255640|BIOUG10624-F02|Ctenosciara_hyalipennis|COI-5P	CNPEL751-14	ENEA	0.0017	0.0017	0.0017	0	0	0	0	0.0172	0	0	0	0.0175	0	0	0	0	0	0	0	0	0	0	0.0175	0	0	0	0	0	0	0	0.0184	0	0	0	0	0	0	0	0	0.0177	0	0	0	0	0	0	0
[1393] #CNPEL752-14|KR236389|BIOUG10624-F03|Ctenosciara_hyalipennis|COI-5P	CNPEL752-14	ENEA	0.0017	0.0017	0.0017	0	0	0	0	0.0172	0	0	0	0.0175	0	0	0	0	0	0	0	0	0	0	0.0175	0	0	0	0	0	0	0	0.0184	0	0	0	0	0	0	0	0	0.0177	0	0	0	0	0	0	0
[1394] #CNPEL753-14|KR246860|BIOUG10624-F04|Ctenosciara_hyalipennis|COI-5P	CNPEL753-14	ENEA	0.0018	0.0018	0.0018	0	0	0	0	0.0181	0	0	0	0.0181	0	0	0	0	0	0	0	0	0	0	0.0184	0	0	0	0	0	0	0	0.0189	0	0	0	0	0	0	0	0	0.0181	0	0	0	0	0	0	0
[1395] #CNPEL756-14|KR251365|BIOUG10624-F07|Ctenosciara_hyalipennis|COI-5P	CNPEL756-14	ENEA	0.0017	0.0017	0.0017	0	0	0	0	0.0172	0	0	0	0.0175	0	0	0	0	0	0	0	0	0	0	0.0175	0	0	0	0	0	0	0	0.0184	0	0	0	0	0	0	0	0	0.0177	0	0	0	0	0	0	0
[1396] #CNPEL757-14|KR250529|BIOUG10624-F08|Ctenosciara_hyalipennis|COI-5P	CNPEL757-14	ENEA	0	0	0	0.0017	0.0018	0.0017	0.0017	0.0189	0.0017	0.0017	0.0017	0.0193	0.0018	0.0017	0.0018	0.0017	0.0018	0.0018	0.0017	0.0017	0.0017	0.0017	0.0193	0.0017	0.0017	0.0017	0.0017	0.0017	0.0018	0.0017	0.0202	0.0017	0.0018	0.0017	0.0017	0.0017	0.0017	0.0017	0.0017	0.0195	0.0018	0.0017	0.0018	0.0018	0.0018	0.0017	0.0017
[1397] #CNPEL762-14|KR249890|BIOUG10624-G01|Ctenosciara_hyalipennis|COI-5P	CNPEL762-14	ENEA	0.0017	0.0017	0.0017	0	0	0	0	0.0175	0	0	0	0.0175	0	0	0	0	0	0	0	0	0	0	0.0178	0	0	0	0	0	0	0	0.0184	0	0	0	0	0	0	0	0	0.0177	0	0	0	0	0	0	0
[1398] #CNPEL764-14|KR255657|BIOUG10624-G03|Ctenosciara_hyalipennis|COI-5P	CNPEL764-14	ENEA	0.0017	0.0017	0.0017	0	0	0	0	0.0172	0	0	0	0.0175	0	0	0	0	0	0	0	0	0	0	0.0175	0	0	0	0	0	0	0	0.0184	0	0	0	0	0	0	0	0	0.0177	0	0	0	0	0	0	0
[1399] #CNPEL767-14|KR245872|BIOUG10624-G06|Ctenosciara_hyalipennis|COI-5P	CNPEL767-14	ENEA	0	0	0	0.0018	0.0018	0.0017	0.0018	0.0193	0.0017	0.0017	0.0018	0.0193	0.0018	0.0018	0.0018	0.0017	0.0018	0.0018	0.0017	0.0017	0.0018	0.0018	0.0196	0.0017	0.0017	0.0017	0.0017	0.0018	0.0018	0.0017	0.0202	0.0017	0.0018	0.0017	0.0017	0.0017	0.0017	0.0018	0.0018	0.0195	0.0018	0.0018	0.0018	0.0018	0.0018	0.0017	0.0018
[1400] #CNPEL771-14|KR235988|BIOUG10624-G10|Ctenosciara_hyalipennis|COI-5P	CNPEL771-14	ENEA	0.0017	0.0017	0.0017	0	0	0	0	0.0172	0	0	0	0.0175	0	0	0	0	0	0	0	0	0	0	0.0175	0	0	0	0	0	0	0	0.0184	0	0	0	0	0	0	0	0	0.0177	0	0	0	0	0	0	0
[1401] #CNPEL781-14|KR234867|BIOUG10624-H08|Ctenosciara_hyalipennis|COI-5P	CNPEL781-14	ENEA	0	0	0	0.0018	0.0019	0.0018	0.0018	0.0202	0.0018	0.0018	0.0018	0.0202	0.0019	0.0018	0.0018	0.0018	0.0018	0.0019	0.0018	0.0018	0.0018	0.0018	0.0205	0.0018	0.0018	0.0018	0.0018	0.0018	0.0019	0.0018	0.0211	0.0018	0.0019	0.0018	0.0018	0.0018	0.0018	0.0018	0.0018	0.0202	0.0019	0.0018	0.0018	0.0019	0.0019	0.0018	0.0018
[1402] #CNPEL789-14|KR257113|BIOUG10625-A05|Ctenosciara_hyalipennis|COI-5P	CNPEL789-14	ENEA	0.0018	0.0018	0.0018	0	0	0	0	0.0181	0	0	0	0.0181	0	0	0	0	0	0	0	0	0	0	0.0184	0	0	0	0	0	0	0	0.0189	0	0	0	0	0	0	0	0	0.0181	0	0	0	0	0	0	0
[1403] #CNPEL806-14|KR235111|BIOUG10625-B10|Ctenosciara_hyalipennis|COI-5P	CNPEL806-14	ENEA	0.0017	0.0017	0.0017	0	0	0	0	0.0172	0	0	0	0.0176	0	0	0	0	0	0	0	0	0	0	0.0175	0	0	0	0	0	0	0	0.0184	0	0	0	0	0	0	0	0	0.0177	0	0	0	0	0	0	0
[1404] #CNPEL810-14|KR239951|BIOUG10625-C02|Ctenosciara_hyalipennis|COI-5P	CNPEL810-14	ENEA	0.0017	0.0017	0.0017	0	0	0	0	0.0173	0	0	0	0.0176	0	0	0	0	0	0	0	0	0	0	0.0175	0	0	0	0	0	0	0	0.0184	0	0	0	0	0	0	0	0	0.0177	0	0	0	0	0	0	0
[1405] #CNPEL814-14|KR236894|BIOUG10625-C06|Ctenosciara_hyalipennis|COI-5P	CNPEL814-14	ENEA	0	0	0	0.0017	0.0018	0.0017	0.0017	0.0189	0.0017	0.0017	0.0017	0.0194	0.0018	0.0017	0.0018	0.0017	0.0018	0.0018	0.0017	0.0017	0.0017	0.0017	0.0193	0.0017	0.0017	0.0017	0.0017	0.0017	0.0018	0.0017	0.0202	0.0017	0.0018	0.0017	0.0017	0.0017	0.0017	0.0017	0.0017	0.0195	0.0018	0.0017	0.0018	0.0018	0.0018	0.0017	0.0017
[1406] #CNPEL815-14|KR252598|BIOUG10625-C07|Ctenosciara_hyalipennis|COI-5P	CNPEL815-14	ENEA	0	0	0	0.0017	0.0018	0.0017	0.0017	0.0194	0.0017	0.0017	0.0017	0.0198	0.0018	0.0017	0.0018	0.0017	0.0018	0.0018	0.0017	0.0018	0.0017	0.0017	0.0194	0.0017	0.0017	0.0017	0.0017	0.0017	0.0018	0.0017	0.0202	0.0017	0.0018	0.0017	0.0017	0.0018	0.0018	0.0017	0.0017	0.02	0.0018	0.0017	0.0018	0.0018	0.0018	0.0017	0.0017
[1407] #CNPEL818-14|KR237890|BIOUG10625-C10|Ctenosciara_hyalipennis|COI-5P	CNPEL818-14	ENEA	0.0017	0.0017	0.0017	0	0	0	0	0.0172	0	0	0	0.0176	0	0	0	0	0	0	0	0	0	0	0.0175	0	0	0	0	0	0	0	0.0184	0	0	0	0	0	0	0	0	0.0177	0	0	0	0	0	0	0
[1408] #CNPEL828-14|KR244227|BIOUG10625-D08|Ctenosciara_hyalipennis|COI-5P	CNPEL828-14	ENEA	0.0017	0.0017	0.0017	0	0	0	0	0.0176	0	0	0	0.0176	0	0	0	0	0	0	0	0	0	0	0.0179	0	0	0	0	0	0	0	0.0184	0	0	0	0	0	0	0	0	0.0177	0	0	0	0	0	0	0
[1409] #CNPEL831-14|KR242545|BIOUG10625-D11|Ctenosciara_hyalipennis|COI-5P	CNPEL831-14	ENEA	0.0017	0.0017	0.0017	0	0	0	0	0.0172	0	0	0	0.0176	0	0	0	0	0	0	0	0	0	0	0.0175	0	0	0	0	0	0	0	0.0184	0	0	0	0	0	0	0	0	0.0177	0	0	0	0	0	0	0
[1410] #CNPEL842-14|KR251858|BIOUG10625-E10|Ctenosciara_hyalipennis|COI-5P	CNPEL842-14	ENEA	0.0017	0.0017	0.0017	0	0	0	0	0.0175	0	0	0	0.0179	0	0	0	0	0	0	0	0	0	0	0.0175	0	0	0	0	0	0	0	0.0184	0	0	0	0	0	0	0	0	0.018	0	0	0	0	0	0	0
[1411] #CNPEL849-14|KR244593|BIOUG10625-F05|Ctenosciara_hyalipennis|COI-5P	CNPEL849-14	ENEA	0.0018	0.0018	0.0018	0	0	0	0	0.018	0	0	0	0.018	0	0	0	0	0	0	0	0	0	0	0.0183	0	0	0	0	0	0	0	0.0188	0	0	0	0	0	0	0	0	0.018	0	0	0	0	0	0	0
[1412] #CNPEL855-14|KR254314|BIOUG10625-F11|Ctenosciara_hyalipennis|COI-5P	CNPEL855-14	ENEA	0.0017	0.0017	0.0017	0	0	0	0	0.0173	0	0	0	0.0176	0	0	0	0	0	0	0	0	0	0	0.0175	0	0	0	0	0	0	0	0.0184	0	0	0	0	0	0	0	0	0.0177	0	0	0	0	0	0	0
[1413] #CNPEL857-14|KR257452|BIOUG10625-G01|Ctenosciara_hyalipennis|COI-5P	CNPEL857-14	ENEA	0.0017	0.0017	0.0017	0	0	0	0	0.0174	0	0	0	0.0176	0	0	0	0	0	0	0	0	0	0	0.0176	0	0	0	0	0	0	0	0.0184	0	0	0	0	0	0	0	0	0.0177	0	0	0	0	0	0	0
[1414] #CNPEL862-14|KR253081|BIOUG10625-G06|Ctenosciara_hyalipennis|COI-5P	CNPEL862-14	ENEA	0.0017	0.0017	0.0017	0	0	0	0	0.0176	0	0	0	0.0176	0	0	0	0	0	0	0	0	0	0	0.0179	0	0	0	0	0	0	0	0.0184	0	0	0	0	0	0	0	0	0.0177	0	0	0	0	0	0	0
[1415] #CNPEL863-14|KR254887|BIOUG10625-G07|Ctenosciara_hyalipennis|COI-5P	CNPEL863-14	ENEA	0.0017	0.0017	0.0017	0	0	0	0	0.0173	0	0	0	0.0176	0	0	0	0	0	0	0	0	0	0	0.0175	0	0	0	0	0	0	0	0.0184	0	0	0	0	0	0	0	0	0.0177	0	0	0	0	0	0	0
[1416] #CNPEL878-14|KR234726|BIOUG10625-H10|Ctenosciara_hyalipennis|COI-5P	CNPEL878-14	ENEA	0.0017	0.0017	0.0017	0	0	0	0	0.0173	0	0	0	0.0176	0	0	0	0	0	0	0	0	0	0	0.0175	0	0	0	0	0	0	0	0.0184	0	0	0	0	0	0	0	0	0.0177	0	0	0	0	0	0	0
[1417] #CNPEL881-14|KR253239|BIOUG10626-A02|Ctenosciara_hyalipennis|COI-5P	CNPEL881-14	ENEA	0.0017	0.0017	0.0017	0	0	0	0	0.0173	0	0	0	0.0176	0	0	0	0	0	0	0	0	0	0	0.0175	0	0	0	0	0	0	0	0.0184	0	0	0	0	0	0	0	0	0.0177	0	0	0	0	0	0	0
[1418] #CNPEL886-14|KR258308|BIOUG10626-A07|Ctenosciara_hyalipennis|COI-5P	CNPEL886-14	ENEA	0.0019	0.0019	0.0019	0	0	0	0	0.017	0	0	0	0.017	0	0	0	0	0	0	0	0	0	0	0.017	0	0	0	0	0	0	0	0.0175	0	0	0	0	0	0	0	0	0.017	0	0	0	0	0	0	0
[1419] #CNPEL887-14|KR247307|BIOUG10626-A08|Ctenosciara_hyalipennis|COI-5P	CNPEL887-14	ENEA	0	0	0	0.0018	0.0018	0.0017	0.0018	0.0194	0.0017	0.0017	0.0018	0.0194	0.0018	0.0018	0.0018	0.0017	0.0018	0.0018	0.0017	0.0017	0.0018	0.0018	0.0197	0.0017	0.0017	0.0017	0.0017	0.0018	0.0018	0.0017	0.0203	0.0017	0.0018	0.0017	0.0017	0.0017	0.0017	0.0018	0.0018	0.0195	0.0018	0.0018	0.0018	0.0018	0.0018	0.0017	0.0018
[1420] #CNPEL888-14|KR254370|BIOUG10626-A09|Ctenosciara_hyalipennis|COI-5P	CNPEL888-14	ENEA	0	0	0	0.0018	0.0018	0.0018	0.0018	0.02	0.0018	0.0018	0.0018	0.0205	0.0018	0.0018	0.0018	0.0018	0.0018	0.0018	0.0018	0.0018	0.0018	0.0018	0.0201	0.0018	0.0018	0.0018	0.0018	0.0018	0.0018	0.0018	0.0205	0.0018	0.0018	0.0018	0.0018	0.0018	0.0018	0.0018	0.0018	0.0206	0.0018	0.0018	0.0018	0.0018	0.0018	0.0018	0.0018
[1421] #CNPEL913-14|KR240858|BIOUG10626-C10|Ctenosciara_hyalipennis|COI-5P	CNPEL913-14	ENEA	0.0017	0.0017	0.0017	0	0	0	0	0.0174	0	0	0	0.0176	0	0	0	0	0	0	0	0	0	0	0.0176	0	0	0	0	0	0	0	0.0184	0	0	0	0	0	0	0	0	0.0177	0	0	0	0	0	0	0
[1422] #CNPEL917-14|KR235830|BIOUG10626-D02|Ctenosciara_hyalipennis|COI-5P	CNPEL917-14	ENEA	0.0018	0.0018	0.0018	0	0	0	0	0.018	0	0	0	0.018	0	0	0	0	0	0	0	0	0	0	0.0183	0	0	0	0	0	0	0	0.0188	0	0	0	0	0	0	0	0	0.018	0	0	0	0	0	0	0
[1423] #CNPEL918-14|KR242933|BIOUG10626-D03|Ctenosciara_hyalipennis|COI-5P	CNPEL918-14	ENEA	0.0017	0.0017	0.0017	0	0	0	0	0.0176	0	0	0	0.0176	0	0	0	0	0	0	0	0	0	0	0.0179	0	0	0	0	0	0	0	0.0184	0	0	0	0	0	0	0	0	0.0177	0	0	0	0	0	0	0
[1424] #CNPEL924-14|KR237462|BIOUG10626-D09|Ctenosciara_hyalipennis|COI-5P	CNPEL924-14	ENEA	0.0017	0.0017	0.0017	0	0	0	0	0.0176	0	0	0	0.0176	0	0	0	0	0	0	0	0	0	0	0.0179	0	0	0	0	0	0	0	0.0184	0	0	0	0	0	0	0	0	0.0177	0	0	0	0	0	0	0
[1425] #CNPEL926-14|KR244628|BIOUG10626-D11|Ctenosciara_hyalipennis|COI-5P	CNPEL926-14	ENEA	0.0017	0.0017	0.0017	0	0	0	0	0.0172	0	0	0	0.0176	0	0	0	0	0	0	0	0	0	0	0.0175	0	0	0	0	0	0	0	0.0184	0	0	0	0	0	0	0	0	0.0177	0	0	0	0	0	0	0
[1426] #CNPEL932-14|KR246884|BIOUG10626-E05|Ctenosciara_hyalipennis|COI-5P	CNPEL932-14	ENEA	0.0018	0.0018	0.0018	0	0	0	0	0.0179	0	0	0	0.0179	0	0	0	0	0	0	0	0	0	0	0.0179	0	0	0	0	0	0	0	0.0184	0	0	0	0	0	0	0	0	0.018	0	0	0	0	0	0	0
[1427] #CNPEL940-14|KR239937|BIOUG10626-F01|Ctenosciara_hyalipennis|COI-5P	CNPEL940-14	ENEA	0	0	0	0.0018	0.0018	0.0017	0.0018	0.0194	0.0017	0.0017	0.0018	0.0194	0.0018	0.0018	0.0018	0.0017	0.0018	0.0018	0.0017	0.0017	0.0018	0.0018	0.0197	0.0017	0.0017	0.0017	0.0017	0.0018	0.0018	0.0017	0.0203	0.0017	0.0018	0.0017	0.0017	0.0017	0.0017	0.0018	0.0018	0.0195	0.0018	0.0018	0.0018	0.0018	0.0018	0.0017	0.0018
[1428] #CNPEL947-14|KR241772|BIOUG10626-F08|Ctenosciara_hyalipennis|COI-5P	CNPEL947-14	ENEA	0.0017	0.0017	0.0017	0	0	0	0	0.0175	0	0	0	0.0179	0	0	0	0	0	0	0	0	0	0	0.0175	0	0	0	0	0	0	0	0.0184	0	0	0	0	0	0	0	0	0.018	0	0	0	0	0	0	0
[1429] #CNPEL949-14|KR248587|BIOUG10626-F10|Ctenosciara_hyalipennis|COI-5P	CNPEL949-14	ENEA	0.0017	0.0017	0.0017	0	0	0	0	0.0173	0	0	0	0.0176	0	0	0	0	0	0	0	0	0	0	0.0175	0	0	0	0	0	0	0	0.0184	0	0	0	0	0	0	0	0	0.0177	0	0	0	0	0	0	0
[1430] #CNPEL950-14|KR249553|BIOUG10626-F11|Ctenosciara_hyalipennis|COI-5P	CNPEL950-14	ENEA	0.0017	0.0017	0.0017	0	0	0	0	0.0176	0	0	0	0.0179	0	0	0	0	0	0	0	0	0	0	0.0176	0	0	0	0	0	0	0	0.0184	0	0	0	0	0	0	0	0	0.018	0	0	0	0	0	0	0
[1431] #CNPEL951-14|KR255478|BIOUG10626-F12|Ctenosciara_hyalipennis|COI-5P	CNPEL951-14	ENEA	0.0017	0.0017	0.0017	0	0	0	0	0.0174	0	0	0	0.0176	0	0	0	0	0	0	0	0	0	0	0.0176	0	0	0	0	0	0	0	0.0184	0	0	0	0	0	0	0	0	0.0177	0	0	0	0	0	0	0
[1432] #CNPEL968-14|KR248365|BIOUG10626-H05|Ctenosciara_hyalipennis|COI-5P	CNPEL968-14	ENEA	0	0	0	0.0018	0.0018	0.0018	0.0018	0.0198	0.0018	0.0018	0.0018	0.0198	0.0018	0.0018	0.0018	0.0018	0.0018	0.0018	0.0018	0.0018	0.0018	0.0018	0.0198	0.0018	0.0018	0.0018	0.0018	0.0018	0.0018	0.0018	0.0203	0.0018	0.0018	0.0018	0.0018	0.0018	0.0018	0.0018	0.0018	0.0199	0.0018	0.0018	0.0018	0.0018	0.0018	0.0018	0.0018
[1433] #CNPEL976-14|KR250530|BIOUG10627-A02|Ctenosciara_hyalipennis|COI-5P	CNPEL976-14	ENEA	0	0	0	0.0018	0.0018	0.0018	0.0018	0.0202	0.0018	0.0018	0.0018	0.0205	0.0018	0.0018	0.0018	0.0018	0.0018	0.0018	0.0018	0.0018	0.0018	0.0018	0.0202	0.0018	0.0018	0.0018	0.0018	0.0018	0.0018	0.0018	0.0205	0.0018	0.0018	0.0018	0.0018	0.0018	0.0018	0.0018	0.0018	0.0206	0.0018	0.0018	0.0018	0.0018	0.0018	0.0018	0.0018
[1434] #CNPEL977-14|KR244919|BIOUG10627-A03|Ctenosciara_hyalipennis|COI-5P	CNPEL977-14	ENEA	0.0017	0.0017	0.0017	0	0	0	0	0.0176	0	0	0	0.018	0	0	0	0	0	0	0	0	0	0	0.0176	0	0	0	0	0	0	0	0.0184	0	0	0	0	0	0	0	0	0.0181	0	0	0	0	0	0	0
[1435] #CNPEL985-14|KR238306|BIOUG10627-A11|Ctenosciara_hyalipennis|COI-5P	CNPEL985-14	ENEA	0.0018	0.0018	0.0018	0	0	0	0	0.018	0	0	0	0.018	0	0	0	0	0	0	0	0	0	0	0.0182	0	0	0	0	0	0	0	0.0188	0	0	0	0	0	0	0	0	0.018	0	0	0	0	0	0	0
[1436] #CNPEL988-14|KR243396|BIOUG10627-B02|Ctenosciara_hyalipennis|COI-5P	CNPEL988-14	ENEA	0	0	0	0.0017	0.0018	0.0017	0.0017	0.0189	0.0017	0.0017	0.0017	0.0194	0.0018	0.0017	0.0018	0.0017	0.0018	0.0018	0.0017	0.0017	0.0017	0.0017	0.0193	0.0017	0.0017	0.0017	0.0017	0.0017	0.0018	0.0017	0.0202	0.0017	0.0018	0.0017	0.0017	0.0017	0.0017	0.0017	0.0017	0.0195	0.0018	0.0017	0.0018	0.0018	0.0018	0.0017	0.0017
[1437] #CNPEL994-14|KR245264|BIOUG10627-B08|Ctenosciara_hyalipennis|COI-5P	CNPEL994-14	ENEA	0.0017	0.0017	0.0017	0	0	0	0	0.0174	0	0	0	0.0176	0	0	0	0	0	0	0	0	0	0	0.0176	0	0	0	0	0	0	0	0.0184	0	0	0	0	0	0	0	0	0.0177	0	0	0	0	0	0	0
[1438] #CNPEL997-14|KR240054|BIOUG10627-B11|Ctenosciara_hyalipennis|COI-5P	CNPEL997-14	ENEA	0.0017	0.0017	0.0017	0	0	0	0	0.0173	0	0	0	0.0176	0	0	0	0	0	0	0	0	0	0	0.0175	0	0	0	0	0	0	0	0.0184	0	0	0	0	0	0	0	0	0.0177	0	0	0	0	0	0	0
[1439] #CNPEM002-14|KR246612|BIOUG10659-A02|Ctenosciara_hyalipennis|COI-5P	CNPEM002-14	ENEA	0.0018	0.0018	0.0018	0	0	0	0	0.018	0	0	0	0.018	0	0	0	0	0	0	0	0	0	0	0.018	0	0	0	0	0	0	0	0.0184	0	0	0	0	0	0	0	0	0.0181	0	0	0	0	0	0	0
[1440] #CNPEM030-14|KR249267|BIOUG10659-C06|Ctenosciara_hyalipennis|COI-5P	CNPEM030-14	ENEA	0.0018	0.0018	0.0018	0	0	0	0	0.0179	0	0	0	0.0179	0	0	0	0	0	0	0	0	0	0	0.0179	0	0	0	0	0	0	0	0.0184	0	0	0	0	0	0	0	0	0.018	0	0	0	0	0	0	0
[1441] #CNPEM042-14|KR258551|BIOUG10659-D06|Ctenosciara_hyalipennis|COI-5P	CNPEM042-14	ENEA	0.0018	0.0018	0.0018	0	0	0	0	0.0187	0	0	0	0.0187	0	0	0	0	0	0	0	0	0	0	0.0187	0	0	0	0	0	0	0	0.0193	0	0	0	0	0	0	0	0	0.0187	0	0	0	0	0	0	0
[1442] #CNPEM1103-14|KR246552|BIOUG10740-E10|Ctenosciara_hyalipennis|COI-5P	CNPEM1103-14	ENEA	0.0017	0.0017	0.0017	0	0	0	0	0.0173	0	0	0	0.0176	0	0	0	0	0	0	0	0	0	0	0.0175	0	0	0	0	0	0	0	0.0184	0	0	0	0	0	0	0	0	0.0177	0	0	0	0	0	0	0
[1443] #CNPEM1115-14|KR246392|BIOUG10740-F10|Ctenosciara_hyalipennis|COI-5P	CNPEM1115-14	ENEA	0	0	0	0.0017	0.0018	0.0017	0.0017	0.019	0.0017	0.0017	0.0017	0.0194	0.0018	0.0017	0.0018	0.0017	0.0018	0.0018	0.0017	0.0017	0.0017	0.0017	0.0193	0.0017	0.0017	0.0017	0.0017	0.0017	0.0018	0.0017	0.0202	0.0017	0.0018	0.0017	0.0017	0.0017	0.0017	0.0017	0.0017	0.0195	0.0018	0.0017	0.0018	0.0018	0.0018	0.0017	0.0017
[1444] #CNPEM1204-14|KR256090|BIOUG10758-F04|Ctenosciara_hyalipennis|COI-5P	CNPEM1204-14	ENEA	0.0017	0.0017	0.0017	0	0	0	0	0.0173	0	0	0	0.0176	0	0	0	0	0	0	0	0	0	0	0.0175	0	0	0	0	0	0	0	0.0184	0	0	0	0	0	0	0	0	0.0177	0	0	0	0	0	0	0
[1445] #CNPEM124-14|KR245350|BIOUG10660-C05|Ctenosciara_hyalipennis|COI-5P	CNPEM124-14	ENEA	0.0018	0.0018	0.0018	0	0	0	0	0.0187	0	0	0	0.0187	0	0	0	0	0	0	0	0	0	0	0.0187	0	0	0	0	0	0	0	0.0193	0	0	0	0	0	0	0	0	0.0187	0	0	0	0	0	0	0
[1446] #CNPEM1274-14|KR241787|BIOUG10759-D03|Ctenosciara_hyalipennis|COI-5P	CNPEM1274-14	ENEA	0.0017	0.0017	0.0017	0	0	0	0	0.0172	0	0	0	0.0176	0	0	0	0	0	0	0	0	0	0	0.0175	0	0	0	0	0	0	0	0.0184	0	0	0	0	0	0	0	0	0.0177	0	0	0	0	0	0	0
[1447] #CNPEM1339-14|KR243833|BIOUG10760-A09|Ctenosciara_hyalipennis|COI-5P	CNPEM1339-14	ENEA	0	0	0	0.0018	0.0019	0.0018	0.0018	0.0202	0.0018	0.0018	0.0018	0.0202	0.0019	0.0018	0.0018	0.0018	0.0018	0.0019	0.0018	0.0018	0.0018	0.0018	0.0202	0.0018	0.0018	0.0018	0.0018	0.0018	0.0019	0.0018	0.0208	0.0018	0.0019	0.0018	0.0018	0.0018	0.0018	0.0018	0.0018	0.0202	0.0019	0.0018	0.0018	0.0019	0.0019	0.0018	0.0018
[1448] #CNPEM1438-14|KR241670|BIOUG10761-B01|Ctenosciara_hyalipennis|COI-5P	CNPEM1438-14	ENEA	0.0018	0.0018	0.0018	0	0	0	0	0.0185	0	0	0	0.0185	0	0	0	0	0	0	0	0	0	0	0.0185	0	0	0	0	0	0	0	0.0188	0	0	0	0	0	0	0	0	0.0185	0	0	0	0	0	0	0
[1449] #CNPEM1482-14|KR247702|BIOUG10761-E09|Ctenosciara_hyalipennis|COI-5P	CNPEM1482-14	ENEA	0.0018	0.0018	0.0018	0	0	0	0	0.017	0	0	0	0.0174	0	0	0	0	0	0	0	0	0	0	0.017	0	0	0	0	0	0	0	0.0174	0	0	0	0	0	0	0	0	0.0175	0	0	0	0	0	0	0
[1450] #CNPEM1717-14|KR247011|BIOUG10764-A07|Ctenosciara_hyalipennis|COI-5P	CNPEM1717-14	ENEA	0.0017	0.0017	0.0017	0	0	0	0	0.0172	0	0	0	0.0175	0	0	0	0	0	0	0	0	0	0	0.0175	0	0	0	0	0	0	0	0.0184	0	0	0	0	0	0	0	0	0.0177	0	0	0	0	0	0	0
[1451] #CNPEM1750-14|KR236453|BIOUG10764-D04|Ctenosciara_hyalipennis|COI-5P	CNPEM1750-14	ENEA	0.0017	0.0017	0.0017	0	0	0	0	0.0172	0	0	0	0.0175	0	0	0	0	0	0	0	0	0	0	0.0175	0	0	0	0	0	0	0	0.0184	0	0	0	0	0	0	0	0	0.0177	0	0	0	0	0	0	0
[1452] #CNPEM1783-14|KR255814|BIOUG10764-G01|Ctenosciara_hyalipennis|COI-5P	CNPEM1783-14	ENEA	0.0017	0.0017	0.0017	0	0	0	0	0.0172	0	0	0	0.0175	0	0	0	0	0	0	0	0	0	0	0.0175	0	0	0	0	0	0	0	0.0184	0	0	0	0	0	0	0	0	0.0177	0	0	0	0	0	0	0
[1453] #CNPEM1856-14|KR234316|BIOUG10765-E03|Ctenosciara_hyalipennis|COI-5P	CNPEM1856-14	ENEA	0	0	0	0.0017	0.0018	0.0017	0.0017	0.019	0.0017	0.0017	0.0017	0.0194	0.0018	0.0017	0.0018	0.0017	0.0018	0.0018	0.0017	0.0017	0.0017	0.0017	0.0193	0.0017	0.0017	0.0017	0.0017	0.0017	0.0018	0.0017	0.0202	0.0017	0.0018	0.0017	0.0017	0.0017	0.0017	0.0017	0.0017	0.0195	0.0018	0.0017	0.0018	0.0018	0.0018	0.0017	0.0017
[1454] #CNPEM1858-14|KR252462|BIOUG10765-E05|Ctenosciara_hyalipennis|COI-5P	CNPEM1858-14	ENEA	0	0	0	0.0018	0.0018	0.0018	0.0018	0.0198	0.0018	0.0018	0.0018	0.0198	0.0018	0.0018	0.0018	0.0018	0.0018	0.0018	0.0018	0.0018	0.0018	0.0018	0.0198	0.0018	0.0018	0.0018	0.0018	0.0018	0.0018	0.0018	0.0203	0.0018	0.0018	0.0018	0.0018	0.0018	0.0018	0.0018	0.0018	0.0199	0.0018	0.0018	0.0018	0.0018	0.0018	0.0018	0.0018
[1455] #CNPEM1909-14|KR254635|BIOUG10766-A09|Ctenosciara_hyalipennis|COI-5P	CNPEM1909-14	ENEA	0.0018	0.0018	0.0018	0	0	0	0	0.018	0	0	0	0.018	0	0	0	0	0	0	0	0	0	0	0.0183	0	0	0	0	0	0	0	0.0188	0	0	0	0	0	0	0	0	0.018	0	0	0	0	0	0	0
[1456] #CNPEM1937-14|KR238404|BIOUG10766-D01|Ctenosciara_hyalipennis|COI-5P	CNPEM1937-14	ENEA	0.0017	0.0017	0.0017	0	0	0	0	0.0173	0	0	0	0.0176	0	0	0	0	0	0	0	0	0	0	0.0175	0	0	0	0	0	0	0	0.0184	0	0	0	0	0	0	0	0	0.0177	0	0	0	0	0	0	0
[1457] #CNPEM1939-14|KR241906|BIOUG10766-D03|Ctenosciara_hyalipennis|COI-5P	CNPEM1939-14	ENEA	0.0018	0.0018	0.0018	0	0	0	0	0.018	0	0	0	0.018	0	0	0	0	0	0	0	0	0	0	0.0183	0	0	0	0	0	0	0	0.0188	0	0	0	0	0	0	0	0	0.018	0	0	0	0	0	0	0
[1458] #CNPEM1974-14|KR246210|BIOUG10766-G02|Ctenosciara_hyalipennis|COI-5P	CNPEM1974-14	ENEA	0.0017	0.0017	0.0017	0	0	0	0	0.0175	0	0	0	0.0179	0	0	0	0	0	0	0	0	0	0	0.0175	0	0	0	0	0	0	0	0.0184	0	0	0	0	0	0	0	0	0.018	0	0	0	0	0	0	0
[1459] #CNPEM1990-14|KR256915|BIOUG10766-H06|Ctenosciara_hyalipennis|COI-5P	CNPEM1990-14	ENEA	0	0	0	0.0017	0.0018	0.0017	0.0017	0.0193	0.0017	0.0017	0.0017	0.0197	0.0018	0.0017	0.0018	0.0017	0.0018	0.0018	0.0017	0.0018	0.0017	0.0017	0.0193	0.0017	0.0017	0.0017	0.0017	0.0017	0.0018	0.0017	0.0202	0.0017	0.0018	0.0017	0.0017	0.0018	0.0018	0.0017	0.0017	0.0199	0.0018	0.0017	0.0018	0.0018	0.0018	0.0017	0.0017
[1460] #CNPEM2089-14|KR253676|BIOUG10767-H10|Ctenosciara_hyalipennis|COI-5P	CNPEM2089-14	ENEA	0.0017	0.0017	0.0017	0	0	0	0	0.0173	0	0	0	0.0175	0	0	0	0	0	0	0	0	0	0	0.0175	0	0	0	0	0	0	0	0.0184	0	0	0	0	0	0	0	0	0.0177	0	0	0	0	0	0	0
[1461] #CNPEM2146-14|KR251754|BIOUG10768-E08|Ctenosciara_hyalipennis|COI-5P	CNPEM2146-14	ENEA	0.0017	0.0017	0.0017	0	0	0	0	0.0177	0	0	0	0.0177	0	0	0	0	0	0	0	0	0	0	0.018	0	0	0	0	0	0	0	0.0185	0	0	0	0	0	0	0	0	0.0177	0	0	0	0	0	0	0
[1462] #CNPEM224-14|KR253176|BIOUG10731-C10|Ctenosciara_hyalipennis|COI-5P	CNPEM224-14	ENEA	0.0019	0.0019	0.0019	0	0	0	0	0.0174	0	0	0	0.0174	0	0	0	0	0	0	0	0	0	0	0.0174	0	0	0	0	0	0	0	0.0174	0	0	0	0	0	0	0	0	0.0174	0	0	0	0	0	0	0
[1463] #CNPEM2296-14|KR242914|BIOUG10770-B04|Ctenosciara_hyalipennis|COI-5P	CNPEM2296-14	ENEA	0.0018	0.0018	0.0018	0	0	0	0	0.0184	0	0	0	0.0184	0	0	0	0	0	0	0	0	0	0	0.0187	0	0	0	0	0	0	0	0.0193	0	0	0	0	0	0	0	0	0.0184	0	0	0	0	0	0	0
[1464] #CNPEM2299-14|KR251864|BIOUG10770-B07|Ctenosciara_hyalipennis|COI-5P	CNPEM2299-14	ENEA	0	0	0	0.0018	0.0019	0.0018	0.0018	0.0199	0.0018	0.0018	0.0018	0.0199	0.0019	0.0018	0.0018	0.0018	0.0018	0.0019	0.0018	0.0018	0.0018	0.0018	0.0201	0.0018	0.0018	0.0018	0.0018	0.0018	0.0019	0.0018	0.0208	0.0018	0.0019	0.0018	0.0018	0.0018	0.0018	0.0018	0.0018	0.0199	0.0019	0.0018	0.0018	0.0019	0.0019	0.0018	0.0018
[1465] #CNPEM2354-14|KR242037|BIOUG10770-G02|Ctenosciara_hyalipennis|COI-5P	CNPEM2354-14	ENEA	0.0017	0.0017	0.0017	0	0	0	0	0.0173	0	0	0	0.0176	0	0	0	0	0	0	0	0	0	0	0.0175	0	0	0	0	0	0	0	0.0184	0	0	0	0	0	0	0	0	0.0177	0	0	0	0	0	0	0
[1466] #CNPEM2611-14|KR249646|BIOUG10786-F05|Ctenosciara_hyalipennis|COI-5P	CNPEM2611-14	ENEA	0.0017	0.0017	0.0017	0	0	0	0	0.0173	0	0	0	0.0176	0	0	0	0	0	0	0	0	0	0	0.0175	0	0	0	0	0	0	0	0.0184	0	0	0	0	0	0	0	0	0.0177	0	0	0	0	0	0	0
[1467] #CNPEM2648-14|KR254881|BIOUG10787-A07|Ctenosciara_hyalipennis|COI-5P	CNPEM2648-14	ENEA	0.0018	0.0018	0.0018	0	0	0	0	0.018	0	0	0	0.018	0	0	0	0	0	0	0	0	0	0	0.0183	0	0	0	0	0	0	0	0.0188	0	0	0	0	0	0	0	0	0.018	0	0	0	0	0	0	0
[1468] #CNPEM2760-14|KR239071|BIOUG10788-B12|Ctenosciara_hyalipennis|COI-5P	CNPEM2760-14	ENEA	0.0017	0.0017	0.0017	0	0	0	0	0.0173	0	0	0	0.0176	0	0	0	0	0	0	0	0	0	0	0.0175	0	0	0	0	0	0	0	0.0184	0	0	0	0	0	0	0	0	0.0177	0	0	0	0	0	0	0
[1469] #CNPEM2791-14|KR249976|BIOUG10788-E07|Ctenosciara_hyalipennis|COI-5P	CNPEM2791-14	ENEA	0	0	0	0.0018	0.0019	0.0018	0.0019	0.0203	0.0018	0.0018	0.0018	0.0203	0.0019	0.0018	0.0018	0.0018	0.0018	0.0019	0.0018	0.0018	0.0018	0.0018	0.0206	0.0018	0.0018	0.0018	0.0018	0.0018	0.0019	0.0018	0.0212	0.0018	0.0019	0.0018	0.0018	0.0018	0.0018	0.0019	0.0018	0.0203	0.0019	0.0019	0.0018	0.0019	0.0019	0.0018	0.0018
[1470] #CNPEM2905-14|KR254846|BIOUG10789-G02|Ctenosciara_hyalipennis|COI-5P	CNPEM2905-14	ENEA	0.0017	0.0017	0.0017	0	0	0	0	0.0173	0	0	0	0.0176	0	0	0	0	0	0	0	0	0	0	0.0175	0	0	0	0	0	0	0	0.0184	0	0	0	0	0	0	0	0	0.0177	0	0	0	0	0	0	0
[1471] #CNPEM2960-14|KR234582|BIOUG10790-C10|Ctenosciara_hyalipennis|COI-5P	CNPEM2960-14	ENEA	0	0	0	0.0018	0.0019	0.0018	0.0018	0.0199	0.0018	0.0018	0.0018	0.0199	0.0019	0.0018	0.0018	0.0018	0.0018	0.0019	0.0018	0.0018	0.0018	0.0018	0.0201	0.0018	0.0018	0.0018	0.0018	0.0018	0.0019	0.0018	0.0208	0.0018	0.0019	0.0018	0.0018	0.0018	0.0018	0.0018	0.0018	0.0199	0.0019	0.0018	0.0018	0.0019	0.0019	0.0018	0.0018
[1472] #CNPEM3002-14|KR250943|BIOUG10790-G04|Ctenosciara_hyalipennis|COI-5P	CNPEM3002-14	ENEA	0.0017	0.0017	0.0017	0	0	0	0	0.0173	0	0	0	0.0176	0	0	0	0	0	0	0	0	0	0	0.0175	0	0	0	0	0	0	0	0.0184	0	0	0	0	0	0	0	0	0.0178	0	0	0	0	0	0	0
[1473] #CNPEM3016-14|KR235602|BIOUG10790-H06|Ctenosciara_hyalipennis|COI-5P	CNPEM3016-14	ENEA	0.0019	0.0019	0.0019	0	0	0	0	0.0175	0	0	0	0.0175	0	0	0	0	0	0	0	0	0	0	0.0175	0	0	0	0	0	0	0	0.018	0	0	0	0	0	0	0	0	0.0175	0	0	0	0	0	0	0
[1474] #CNPEM3017-14|KR255862|BIOUG10790-H07|Ctenosciara_hyalipennis|COI-5P	CNPEM3017-14	ENEA	0.0019	0.0019	0.0019	0	0	0	0	0.0175	0	0	0	0.0175	0	0	0	0	0	0	0	0	0	0	0.0175	0	0	0	0	0	0	0	0.018	0	0	0	0	0	0	0	0	0.0175	0	0	0	0	0	0	0
[1475] #CNPEM3034-14|KR237329|BIOUG10791-B01|Ctenosciara_hyalipennis|COI-5P	CNPEM3034-14	ENEA	0.0016	0.0016	0.0016	0	0	0	0	0.0172	0	0	0	0.0175	0	0	0	0	0	0	0	0	0	0	0.0175	0	0	0	0	0	0	0	0.0184	0	0	0	0	0	0	0	0	0.0177	0	0	0	0	0	0	0
[1476] #CNPEM3062-14|KR248267|BIOUG10791-D05|Ctenosciara_hyalipennis|COI-5P	CNPEM3062-14	ENEA	0	0	0	0.0018	0.0018	0.0017	0.0018	0.0195	0.0017	0.0017	0.0018	0.0195	0.0018	0.0018	0.0018	0.0017	0.0018	0.0018	0.0017	0.0017	0.0018	0.0018	0.0198	0.0017	0.0017	0.0017	0.0017	0.0018	0.0018	0.0017	0.0204	0.0017	0.0018	0.0017	0.0017	0.0017	0.0017	0.0018	0.0018	0.0195	0.0018	0.0018	0.0018	0.0018	0.0018	0.0017	0.0018
[1477] #CNPEM3070-14|KR248941|BIOUG10791-E01|Ctenosciara_hyalipennis|COI-5P	CNPEM3070-14	ENEA	0	0	0	0.0017	0.0018	0.0017	0.0017	0.0189	0.0017	0.0017	0.0017	0.0193	0.0018	0.0017	0.0018	0.0017	0.0018	0.0018	0.0017	0.0017	0.0017	0.0017	0.0193	0.0017	0.0017	0.0017	0.0017	0.0017	0.0018	0.0017	0.0202	0.0017	0.0018	0.0017	0.0017	0.0017	0.0017	0.0017	0.0017	0.0195	0.0018	0.0017	0.0018	0.0018	0.0018	0.0017	0.0017
[1478] #CNPEM3098-14|KR255087|BIOUG10791-G05|Ctenosciara_hyalipennis|COI-5P	CNPEM3098-14	ENEA	0.0018	0.0018	0.0018	0	0	0	0	0.0179	0	0	0	0.0179	0	0	0	0	0	0	0	0	0	0	0.0179	0	0	0	0	0	0	0	0.0185	0	0	0	0	0	0	0	0	0.018	0	0	0	0	0	0	0
[1479] #CNPEM3168-14|KR249543|BIOUG10792-E04|Ctenosciara_hyalipennis|COI-5P	CNPEM3168-14	ENEA	0.0019	0.0019	0.0019	0	0	0	0	0.0171	0	0	0	0.0171	0	0	0	0	0	0	0	0	0	0	0.0174	0	0	0	0	0	0	0	0.018	0	0	0	0	0	0	0	0	0.0171	0	0	0	0	0	0	0
[1480] #CNPEM3201-14|KR973856|BIOUG10792-H01|Ctenosciara_hyalipennis|COI-5P	CNPEM3201-14	ENEA	0	0	0	0.002	0.002	0.0019	0.002	0.0197	0.0019	0.0019	0.002	0.0197	0.0021	0.002	0.002	0.0019	0.002	0.0021	0.0019	0.0019	0.002	0.002	0.02	0.0019	0.0019	0.0019	0.0019	0.002	0.002	0.0019	0.0208	0.0019	0.0021	0.0019	0.0019	0.0019	0.0019	0.002	0.002	0.0197	0.0021	0.002	0.002	0.002	0.0021	0.0019	0.002
[1481] #CNPEM3444-14|KR247443|BIOUG10795-D07|Ctenosciara_hyalipennis|COI-5P	CNPEM3444-14	ENEA	0.0018	0.0018	0.0018	0	0	0	0	0.018	0	0	0	0.018	0	0	0	0	0	0	0	0	0	0	0.0183	0	0	0	0	0	0	0	0.0188	0	0	0	0	0	0	0	0	0.018	0	0	0	0	0	0	0
[1482] #CNPEM346-14|KR236961|BIOUG10732-F01|Ctenosciara_hyalipennis|COI-5P	CNPEM346-14	ENEA	0.0018	0.0018	0.0018	0	0	0	0	0.0167	0	0	0	0.0167	0	0	0	0	0	0	0	0	0	0	0.0169	0	0	0	0	0	0	0	0.0175	0	0	0	0	0	0	0	0	0.0167	0	0	0	0	0	0	0
[1483] #CNPEM387-14|KR254608|BIOUG10733-A07|Ctenosciara_hyalipennis|COI-5P	CNPEM387-14	ENEA	0	0	0	0.0018	0.0019	0.0018	0.0018	0.02	0.0018	0.0018	0.0018	0.02	0.0019	0.0018	0.0018	0.0018	0.0018	0.0019	0.0018	0.0018	0.0018	0.0018	0.0202	0.0018	0.0018	0.0018	0.0018	0.0018	0.0019	0.0018	0.0209	0.0018	0.0019	0.0018	0.0018	0.0018	0.0018	0.0018	0.0018	0.02	0.0019	0.0018	0.0018	0.0019	0.0019	0.0018	0.0018
[1484] #CNPEM418-14|KR240695|BIOUG10733-D02|Ctenosciara_hyalipennis|COI-5P	CNPEM418-14	ENEA	0.0019	0.0019	0.0019	0	0	0	0	0.0172	0	0	0	0.0172	0	0	0	0	0	0	0	0	0	0	0.0174	0	0	0	0	0	0	0	0.018	0	0	0	0	0	0	0	0	0.0172	0	0	0	0	0	0	0
[1485] #CNPEM497-14|KR241995|BIOUG10734-B10|Ctenosciara_hyalipennis|COI-5P	CNPEM497-14	ENEA	0.0018	0.0018	0.0018	0	0	0	0	0.018	0	0	0	0.018	0	0	0	0	0	0	0	0	0	0	0.0183	0	0	0	0	0	0	0	0.0188	0	0	0	0	0	0	0	0	0.018	0	0	0	0	0	0	0
[1486] #CNPEM498-14|KR251665|BIOUG10734-B11|Ctenosciara_hyalipennis|COI-5P	CNPEM498-14	ENEA	0.0018	0.0018	0.0018	0	0	0	0	0.018	0	0	0	0.018	0	0	0	0	0	0	0	0	0	0	0.0183	0	0	0	0	0	0	0	0.0188	0	0	0	0	0	0	0	0	0.018	0	0	0	0	0	0	0
[1487] #CNPEM524-14|KR237410|BIOUG10734-E01|Ctenosciara_hyalipennis|COI-5P	CNPEM524-14	ENEA	0	0	0	0.0018	0.0018	0.0017	0.0018	0.0194	0.0017	0.0017	0.0018	0.0194	0.0018	0.0018	0.0018	0.0017	0.0018	0.0018	0.0017	0.0017	0.0018	0.0018	0.0197	0.0017	0.0017	0.0017	0.0017	0.0018	0.0018	0.0017	0.0203	0.0017	0.0018	0.0017	0.0017	0.0017	0.0017	0.0018	0.0018	0.0195	0.0018	0.0018	0.0018	0.0018	0.0018	0.0017	0.0018
[1488] #CNPEM593-14|KR248483|BIOUG10735-B11|Ctenosciara_hyalipennis|COI-5P	CNPEM593-14	ENEA	0.0017	0.0017	0.0017	0	0	0	0	0.0176	0	0	0	0.0179	0	0	0	0	0	0	0	0	0	0	0.0176	0	0	0	0	0	0	0	0.0184	0	0	0	0	0	0	0	0	0.018	0	0	0	0	0	0	0
[1489] #CNPEM681-14|KR252101|BIOUG10736-B04|Ctenosciara_hyalipennis|COI-5P	CNPEM681-14	ENEA	0	0	0	0.0018	0.0019	0.0018	0.0018	0.0199	0.0018	0.0018	0.0018	0.0199	0.0019	0.0018	0.0018	0.0018	0.0018	0.0019	0.0018	0.0018	0.0018	0.0018	0.0201	0.0018	0.0018	0.0018	0.0018	0.0018	0.0019	0.0018	0.0208	0.0018	0.0019	0.0018	0.0018	0.0018	0.0018	0.0018	0.0018	0.0199	0.0019	0.0018	0.0018	0.0019	0.0019	0.0018	0.0018
[1490] #CNPEM726-14|KR234484|BIOUG10736-F01|Ctenosciara_hyalipennis|COI-5P	CNPEM726-14	ENEA	0	0	0	0.0017	0.0018	0.0017	0.0017	0.0194	0.0017	0.0017	0.0017	0.0198	0.0018	0.0017	0.0018	0.0017	0.0018	0.0018	0.0017	0.0018	0.0017	0.0017	0.0194	0.0017	0.0017	0.0017	0.0017	0.0017	0.0018	0.0017	0.0202	0.0017	0.0018	0.0017	0.0017	0.0018	0.0018	0.0017	0.0017	0.02	0.0018	0.0017	0.0018	0.0018	0.0018	0.0017	0.0017
[1491] #CNPEM747-14|KR235389|BIOUG10736-G10|Ctenosciara_hyalipennis|COI-5P	CNPEM747-14	ENEA	0.0017	0.0017	0.0017	0	0	0	0	0.0175	0	0	0	0.0179	0	0	0	0	0	0	0	0	0	0	0.0175	0	0	0	0	0	0	0	0.0184	0	0	0	0	0	0	0	0	0.018	0	0	0	0	0	0	0
[1492] #CNPEM770-14|KR236581|BIOUG10737-A10|Ctenosciara_hyalipennis|COI-5P	CNPEM770-14	ENEA	0.0018	0.0018	0.0018	0	0	0	0	0.0183	0	0	0	0.0183	0	0	0	0	0	0	0	0	0	0	0.0183	0	0	0	0	0	0	0	0.0188	0	0	0	0	0	0	0	0	0.0183	0	0	0	0	0	0	0
[1493] #CNPEM950-14|KR246062|BIOUG10738-H11|Ctenosciara_hyalipennis|COI-5P	CNPEM950-14	ENEA	0.0018	0.0018	0.0018	0	0	0	0	0.018	0	0	0	0.018	0	0	0	0	0	0	0	0	0	0	0.018	0	0	0	0	0	0	0	0.0184	0	0	0	0	0	0	0	0	0.0181	0	0	0	0	0	0	0
[1494] #CNPEN138-14|KR240153|BIOUG10796-H10|Ctenosciara_hyalipennis|COI-5P	CNPEN138-14	ENEA	0	0	0	0.0018	0.0018	0.0017	0.0018	0.0193	0.0017	0.0017	0.0018	0.0193	0.0018	0.0018	0.0018	0.0017	0.0018	0.0018	0.0017	0.0017	0.0018	0.0018	0.0196	0.0017	0.0017	0.0017	0.0017	0.0018	0.0018	0.0017	0.0202	0.0017	0.0018	0.0017	0.0017	0.0017	0.0017	0.0018	0.0018	0.0195	0.0018	0.0018	0.0018	0.0018	0.0018	0.0017	0.0018
[1495] #CNPEN139-14|KR239623|BIOUG10796-H11|Ctenosciara_hyalipennis|COI-5P	CNPEN139-14	ENEA	0	0	0	0.0019	0.0019	0.0019	0.0019	0.0214	0.0019	0.0019	0.0019	0.0214	0.0019	0.0019	0.0019	0.0019	0.0019	0.0019	0.0019	0.0019	0.0019	0.0019	0.0214	0.0019	0.0019	0.0019	0.0019	0.0019	0.0019	0.0019	0.0214	0.0019	0.0019	0.0019	0.0019	0.0019	0.0019	0.0019	0.0019	0.0214	0.0019	0.0019	0.0019	0.0019	0.0019	0.0019	0.0019
[1496] #CNPEN151-14|KR239066|BIOUG10846-A12|Ctenosciara_hyalipennis|COI-5P	CNPEN151-14	ENEA	0.0017	0.0017	0.0017	0	0	0	0	0.0172	0	0	0	0.0175	0	0	0	0	0	0	0	0	0	0	0.0175	0	0	0	0	0	0	0	0.0184	0	0	0	0	0	0	0	0	0.0177	0	0	0	0	0	0	0
[1497] #CNPEN170-14|KR242293|BIOUG10846-C07|Ctenosciara_hyalipennis|COI-5P	CNPEN170-14	ENEA	0.0017	0.0017	0.0017	0	0	0	0	0.0172	0	0	0	0.0175	0	0	0	0	0	0	0	0	0	0	0.0175	0	0	0	0	0	0	0	0.0184	0	0	0	0	0	0	0	0	0.0177	0	0	0	0	0	0	0
[1498] #CNPEN267-14|KR234990|BIOUG10847-C09|Ctenosciara_hyalipennis|COI-5P	CNPEN267-14	ENEA	0.0017	0.0017	0.0017	0	0	0	0	0.0172	0	0	0	0.0175	0	0	0	0	0	0	0	0	0	0	0.0175	0	0	0	0	0	0	0	0.0184	0	0	0	0	0	0	0	0	0.0177	0	0	0	0	0	0	0
[1499] #CNPEN271-14|KR249458|BIOUG10847-D01|Ctenosciara_hyalipennis|COI-5P	CNPEN271-14	ENEA	0	0	0	0.0017	0.0018	0.0017	0.0017	0.0189	0.0017	0.0017	0.0017	0.0193	0.0018	0.0017	0.0018	0.0017	0.0018	0.0018	0.0017	0.0017	0.0017	0.0017	0.0193	0.0017	0.0017	0.0017	0.0017	0.0017	0.0018	0.0017	0.0202	0.0017	0.0018	0.0017	0.0017	0.0017	0.0017	0.0017	0.0017	0.0195	0.0018	0.0017	0.0018	0.0018	0.0018	0.0017	0.0017
[1500] #CNPEN331-14|KR247520|BIOUG10848-A02|Ctenosciara_hyalipennis|COI-5P	CNPEN331-14	ENEA	0	0	0	0.0017	0.0018	0.0017	0.0017	0.0189	0.0017	0.0017	0.0017	0.0193	0.0018	0.0017	0.0018	0.0017	0.0018	0.0018	0.0017	0.0017	0.0017	0.0017	0.0193	0.0017	0.0017	0.0017	0.0017	0.0017	0.0018	0.0017	0.0202	0.0017	0.0018	0.0017	0.0017	0.0017	0.0017	0.0017	0.0017	0.0195	0.0018	0.0017	0.0018	0.0018	0.0018	0.0017	0.0017
[1501] #CNPEN411-14|KR250069|BIOUG10848-G10|Ctenosciara_hyalipennis|COI-5P	CNPEN411-14	ENEA	0.0017	0.0017	0.0017	0	0	0	0	0.0172	0	0	0	0.0175	0	0	0	0	0	0	0	0	0	0	0.0175	0	0	0	0	0	0	0	0.0184	0	0	0	0	0	0	0	0	0.0177	0	0	0	0	0	0	0
[1502] #CNPEN597-14|KR252243|BIOUG10850-G06|Ctenosciara_hyalipennis|COI-5P	CNPEN597-14	ENEA	0.0017	0.0017	0.0017	0	0	0	0	0.0172	0	0	0	0.0175	0	0	0	0	0	0	0	0	0	0	0.0175	0	0	0	0	0	0	0	0.0184	0	0	0	0	0	0	0	0	0.0177	0	0	0	0	0	0	0
[1503] #CNPEN623-14|KR240422|BIOUG10851-A09|Ctenosciara_hyalipennis|COI-5P	CNPEN623-14	ENEA	0.0017	0.0017	0.0017	0	0	0	0	0.0172	0	0	0	0.0175	0	0	0	0	0	0	0	0	0	0	0.0175	0	0	0	0	0	0	0	0.0184	0	0	0	0	0	0	0	0	0.0177	0	0	0	0	0	0	0
[1504] #CNPEN632-14|KR251554|BIOUG10851-B06|Ctenosciara_hyalipennis|COI-5P	CNPEN632-14	ENEA	0.0018	0.0018	0.0018	0	0	0	0	0.018	0	0	0	0.018	0	0	0	0	0	0	0	0	0	0	0.0182	0	0	0	0	0	0	0	0.0188	0	0	0	0	0	0	0	0	0.018	0	0	0	0	0	0	0
[1505] #CNPEN721-14|KR238587|BIOUG10852-A12|Ctenosciara_hyalipennis|COI-5P	CNPEN721-14	ENEA	0.0017	0.0017	0.0017	0	0	0	0	0.0172	0	0	0	0.0175	0	0	0	0	0	0	0	0	0	0	0.0175	0	0	0	0	0	0	0	0.0184	0	0	0	0	0	0	0	0	0.0177	0	0	0	0	0	0	0
[1506] #CNPEN732-14|KR238073|BIOUG10852-B11|Ctenosciara_hyalipennis|COI-5P	CNPEN732-14	ENEA	0.0017	0.0017	0.0017	0	0	0	0	0.0172	0	0	0	0.0175	0	0	0	0	0	0	0	0	0	0	0.0175	0	0	0	0	0	0	0	0.0184	0	0	0	0	0	0	0	0	0.0177	0	0	0	0	0	0	0
[1507] #CNPEN770-14|KR255146|BIOUG10852-F01|Ctenosciara_hyalipennis|COI-5P	CNPEN770-14	ENEA	0.0017	0.0017	0.0017	0	0	0	0	0.0177	0	0	0	0.0177	0	0	0	0	0	0	0	0	0	0	0.0179	0	0	0	0	0	0	0	0.0185	0	0	0	0	0	0	0	0	0.0177	0	0	0	0	0	0	0
[1508] #CNPEN783-14|KR253253|BIOUG10852-G02|Ctenosciara_hyalipennis|COI-5P	CNPEN783-14	ENEA	0.0018	0.0018	0.0018	0	0	0	0	0.0178	0	0	0	0.0178	0	0	0	0	0	0	0	0	0	0	0.0178	0	0	0	0	0	0	0	0.0184	0	0	0	0	0	0	0	0	0.018	0	0	0	0	0	0	0
[1509] #CNPEO183-14|KR239672|BIOUG10858-A02|Ctenosciara_hyalipennis|COI-5P	CNPEO183-14	ENEA	0	0	0	0.0018	0.0019	0.0018	0.0019	0.0185	0.0018	0.0018	0.0018	0.0185	0.0019	0.0018	0.0019	0.0018	0.0019	0.0019	0.0018	0.0018	0.0019	0.0018	0.0188	0.0018	0.0018	0.0018	0.0018	0.0018	0.0019	0.0018	0.0194	0.0018	0.0019	0.0018	0.0018	0.0018	0.0018	0.0019	0.0018	0.0185	0.0019	0.0019	0.0018	0.0019	0.0019	0.0018	0.0018
[1510] #CNPEO647-14|KR256502|BIOUG10899-H02|Ctenosciara_hyalipennis|COI-5P	CNPEO647-14	ENEA	0.0018	0.0018	0.0018	0	0	0	0	0.0183	0	0	0	0.0183	0	0	0	0	0	0	0	0	0	0	0.0186	0	0	0	0	0	0	0	0.0192	0	0	0	0	0	0	0	0	0.0183	0	0	0	0	0	0	0
[1511] #CNPEQ019-14|KR247470|BIOUG10963-G05|Ctenosciara_hyalipennis|COI-5P	CNPEQ019-14	ENEA	0.0017	0.0017	0.0017	0	0	0	0	0.0174	0	0	0	0.0178	0	0	0	0	0	0	0	0	0	0	0.0175	0	0	0	0	0	0	0	0.0184	0	0	0	0	0	0	0	0	0.018	0	0	0	0	0	0	0
[1512] #CNPEQ036-14|KR256178|BIOUG10963-H10|Ctenosciara_hyalipennis|COI-5P	CNPEQ036-14	ENEA	0	0	0	0.0017	0.0018	0.0017	0.0017	0.0189	0.0017	0.0017	0.0017	0.0193	0.0018	0.0017	0.0018	0.0017	0.0018	0.0018	0.0017	0.0017	0.0017	0.0017	0.0193	0.0017	0.0017	0.0017	0.0017	0.0017	0.0018	0.0017	0.0202	0.0017	0.0018	0.0017	0.0017	0.0017	0.0017	0.0017	0.0017	0.0195	0.0018	0.0017	0.0018	0.0018	0.0018	0.0017	0.0017
[1513] #CNPEQ140-14|KR248154|BIOUG11006-A11|Ctenosciara_hyalipennis|COI-5P	CNPEQ140-14	ENEA	0.0017	0.0017	0.0017	0	0	0	0	0.0173	0	0	0	0.0177	0	0	0	0	0	0	0	0	0	0	0.0176	0	0	0	0	0	0	0	0.0185	0	0	0	0	0	0	0	0	0.0179	0	0	0	0	0	0	0
[1514] #CNPEQ142-14|KR253912|BIOUG11006-B01|Ctenosciara_hyalipennis|COI-5P	CNPEQ142-14	ENEA	0.0017	0.0017	0.0017	0	0	0	0	0.0177	0	0	0	0.0177	0	0	0	0	0	0	0	0	0	0	0.018	0	0	0	0	0	0	0	0.0185	0	0	0	0	0	0	0	0	0.0177	0	0	0	0	0	0	0
[1515] #CNPEQ143-14|KR249207|BIOUG11006-B02|Ctenosciara_hyalipennis|COI-5P	CNPEQ143-14	ENEA	0.0017	0.0017	0.0017	0	0	0	0	0.0177	0	0	0	0.0177	0	0	0	0	0	0	0	0	0	0	0.0179	0	0	0	0	0	0	0	0.0185	0	0	0	0	0	0	0	0	0.0177	0	0	0	0	0	0	0
[1516] #CNPEQ149-14|KR245363|BIOUG11006-B08|Ctenosciara_hyalipennis|COI-5P	CNPEQ149-14	ENEA	0.0018	0.0018	0.0018	0	0	0	0	0.0167	0	0	0	0.0167	0	0	0	0	0	0	0	0	0	0	0.0169	0	0	0	0	0	0	0	0.0175	0	0	0	0	0	0	0	0	0.0167	0	0	0	0	0	0	0
[truncated: 2,536 more rows]
[truncated: 4,000 more columns]
