# Supplementary material for: Ctenosciara alexanderkoenigi sp. n. (Diptera: Sciaridae), an exotic invader in Germany?
Source: Biodivers Data J. 2016 Apr 1;(4):e6460. doi: 10.3897/BDJ.4.e6460 (PMC4822059; doi:10.3897/BDJ.4.e6460)
Supplement: Supplementary material 5 — Haplotype information [file biodiversity_data_journal-4-e6460-s005.xlsx]

## Sheet: SNP
	Input Data File: C:\...\BOLD_AAH3983_alignment.fas
	Number of sequences: 4047 Number of sequences used: 4047
	Selected region: 1-658 Number of sites: 658
	Total number of sites (excluding sites with gaps / missing data): 312
	Sites with alignment gaps: not considered
	Number of variable sites: 21
	=========== Haplotype Distribution ===========
	Number of haplotypes, h: 20
	Haplotype diversity, Hd: 0,4531
		1	1	1	1	1	2	2	2	3	3	3	3	3	4	4	4	4	4	4	4	4
		6	6	6	7	8	0	0	3	1	2	2	5	6	1	1	6	6	7	7	7	9
	haplotype	2	3	9	9	1	5	8	8	6	2	8	5	1	0	5	6	7	0	2	8	2	frequency
	Hap_1	T	A	T	G	A	C	T	T	A	A	A	T	A	G	T	A	C	A	C	A	A	2854
	Hap_2	.	.	.	.	.	.	.	G	.	.	.	.	G	.	.	.	.	G	.	.	.	294
	Hap_3	.	.	.	.	.	.	.	.	.	.	.	.	.	.	.	.	A	.	.	.	.	1
	Hap_4	.	.	.	.	.	.	.	.	.	.	.	.	.	A	.	.	.	.	.	.	.	1
	Hap_5	.	.	.	.	.	.	.	A	.	.	.	.	G	.	.	.	.	.	.	.	.	16
	Hap_6	.	.	.	.	.	.	.	.	.	.	.	.	G	.	.	.	.	.	.	.	.	853
	Hap_7	.	.	.	.	.	.	.	G	.	.	.	.	.	.	.	.	.	.	.	.	.	1
	Hap_8	.	.	.	A	.	.	.	.	.	.	.	.	G	.	.	.	.	.	.	.	.	1
	Hap_9	.	.	.	.	.	.	.	.	.	.	.	A	G	.	.	G	.	.	.	.	.	3
	Hap_10	.	.	.	.	.	.	.	G	.	.	.	.	G	.	.	.	.	.	.	.	.	3
	Hap_11	.	.	A	.	G	.	C	.	.	.	.	.	G	.	.	.	.	.	.	C	.	5
	Hap_12	.	.	.	.	.	.	A	.	.	G	.	.	.	.	C	.	.	.	.	C	.	2
	Hap_13	.	.	.	.	.	.	.	.	.	.	.	A	G	.	.	.	.	.	.	.	.	4
	Hap_14	.	.	.	.	.	.	.	.	T	.	.	.	G	.	.	.	.	.	.	.	.	2
	Hap_15	.	.	.	.	.	.	.	.	.	.	.	.	G	.	.	.	.	.	T	.	.	1
	Hap_16	.	.	.	.	.	.	.	.	G	.	.	.	G	.	.	.	.	.	.	.	.	2
	Hap_17	.	G	.	.	.	T	.	.	.	.	.	.	.	.	.	.	.	.	.	C	.	1
	Hap_18	.	.	.	.	.	.	.	.	.	.	.	.	G	.	.	.	.	.	.	.	T	1
	Hap_19	.	.	.	.	.	.	.	A	.	.	G	.	G	.	.	.	.	.	.	.	.	1
	Hap_20	C	.	.	.	.	.	.	.	.	.	.	.	.	.	.	.	.	.	.	.	.	1
